# Supplementary material
Source: PubMed Central journal article supplement (PMC2612478)

## Supplemental Material

### SUPPLEMENTAL MATERIALS AND METHODS

**cDNA constructs.** Human Smad1 through Smad5, and mouse Smad6 through Smad8 cDNAs were as described previously (32).

**Antibodies.** We used commercially available antibodies as follows: mouse anti-FLAG (M2, Sigma, MO), rabbit anti-phospho-Smad1/3 (Cell Signaling, MA, for immunoblotting), anti-phospho-Smad3 (Rockland, PA, for immunoprecipitation), anti-phospho-Smad2 (138D4, Cell Signaling), and anti-JUNB (Santa Cruz, CA).

**Immunoprecipitation and immunoblotting.** Cells lysates were prepared in RIPA lysis buffer [50 mM Tris-HCl pH 8.0, 150 mM NaCl, 0.1% SDS, 0.5% sodium deoxycholate (DOC), 1% Triton-X100] supplemented with protease inhibitors (P8340, Sigma). Igepal CA630 lysis buffer [20 mM Tris-HCl, pH 7.5, 150 mM NaCl, 1% Igepal CA630, and protease inhibitors] was used for transfection experiments. For immunoprecipitation, Exacta Cruz F reagents (Santa Cruz) were used. Immune complexes were washed with lysis buffer three times, and SDS-gel electrophoresis and immunoblotting were performed as described (16), using an LAS-3000 mini lumino-image analyzer (Fuji film, Tokyo, Japan).

**Primers for ChIP-qPCR and RT-qPCR.** Primers used for ChIP-qPCR are as follows:

| Promoter regions | Sense primers (5'-3') | Antisense primers (5'-3') |
|------------------|-----------------------|---------------------------|
|                  |                       |                           |

|                              |                        |                        |
|------------------------------|------------------------|------------------------|
| <i>SERPINE1</i>              | GCAGGACATCCGGGAGAGA    | CCAATAGCCTTGGCCTGAGA   |
| <i>ID1</i>                   | TAAGGTGACCCTTGCTCA     | GTCTAGCTAGTTCCCGTGCT   |
| <i>HPRT1</i>                 | TGTTTGGGCTATTTACTAGTTG | ATAAAATGACTTAAGCCCAGAG |
| <i>HOXA13</i>                | GTCTTGTAGCTGCCATGTTT   | GAACGCTTGTTCTCTTCTA    |
| <i>KIF5B</i>                 | CCATAGAAACAGAGGTTCCA   | GAAGCTGACCAGTACCTTTG   |
| <i>TMEPAI</i>                | AGTCGCGATGGAGCATTTAG   | AGACACCTCGCAGACCAGAC   |
| <i>DMTF1</i>                 | ACCTCTTTTACAGCATCAGC   | TGGGTTGGAATGTTTGTACT   |
| <i>PTGES</i>                 | CTGGGACTCGTTAATGTTGT   | GTCACTAACAAGCCCACTGT   |
| <i>DAB2IP</i>                | GCGTAGGTAGCATGAAAATG   | AAACAGTCACTCAACCTTGG   |
| <i>MNT</i>                   | TGGGTAGGTCACCATTACTC   | GATAAAAATCTGCCCTTTC    |
| <i>BCAT1</i>                 | TAACCACCACCCTTTTGTTA   | GGGAGAGAGGTTTTACATT    |
| <i>MDC1</i>                  | GCCCCTAGAACTCACCTACT   | GAAGCCAATCAGCAAATAAG   |
| <i>SKIL</i>                  | CCCGAAGCAGTAAACTAGA    | AAATAGTCCACCGAGTAGCA   |
| <i>CDC45L</i>                | AAACACCCTCAGTAGAAGCA   | CCCTACTAAATTCGTCTGGA   |
| <i>ING4</i>                  | CCCTTAAAAGGAGAACTTCC   | CTACCATGCAAAAGGAAAAG   |
| <i>JUNB</i>                  | CAGTCCAGACACACAAACC    | CTGTGTCCATGTGTGACAGT   |
| <i>CDC6</i>                  | GCTGAATCTCCGATTATTTG   | TTTGCAGGCTATTTCAAGTC   |
| <i>CDKN1A</i><br><i>SBR1</i> | GAGGAAAAGCATCTTGAG     | AAATAGACGGGAGCAACG     |
| <i>CDKN1A</i><br><i>SBR2</i> | ACTTGTCCCTAGGAAAATCC   | GAAAACGGAGAGTGAGTTTG   |
| <i>CDKN1A *a</i>             | TTCTCCCCAAAGTAAACAGAC  | CTTGAAGCCCCTCTGCTTTC   |
| <i>CDKN1A *b</i>             | GAAGTCAGTTCCTTGTGGAG   | TCTCTCACCTCCTCTGAGTG   |

|                                     |                      |                      |
|-------------------------------------|----------------------|----------------------|
| <i>EGFR</i>                         | GAGTCTGGCTTCGTGACTAC | TGACATCAACAGCAAGTACG |
| <i>SLC9A1</i>                       | GCCGAGGGAAAGAAGTATC  | AGTAGTCGGCATTTTACTCG |
| <i>ETS1</i>                         | AGTCCGTCTGATTCTCCAC  | ACGTCCTGTGTGTCAGTCTT |
| <i>TRAF7</i>                        | TCATCTCTCTCCTGTGCTTT | ACACCCCAGAGAAAGAACCT |
| <i>RNF152</i>                       | CTTCTTGCAGCAACACAGTA | TAGTCCCAGGTGAAACAAAG |
| <i>TFAP2A</i>                       | GTTGTGGAAACAGCTTTGAC | AGTGTGAATGCGTGTGTAAG |
| <i>TRIM25</i>                       | GAAATCCCCTCTGACCTATT | CCTCCTATTCATCCTCATTG |
| <i>SMAD7</i>                        | CTGCCTAGGGCATTTCATT  | CCAGCTTGGGTATATGTTTC |
| <i>MMP9</i>                         | CTATGGCTTCCTTACTGACG | CAATTCCCACACTGACTCTT |
| <i>MYLK</i>                         | AAGGAGCTGAATGTCCTACA | TTTCTCTCCAGTGGTGCTAT |
| <i>DST</i>                          | CCACAATGAACCAAGAGAAG | TTACCGTAGCAGTGATTCTG |
| <i>CST6</i>                         | TGTGACTTTGAGGTCCTTGT | GGGACTTATCACATCTGCAC |
| <i>JUN</i>                          | TCGGACTATACTGCCGACCT | ACTGAGTGTGGCTGAAGCA  |
| <i>EEF1D</i>                        | CGACACTTCAAAGGCAGA   | AGCACTTGTGCAGACTCCTC |
| <i>PTHLH P3</i>                     | GTTTACACGTCTCCCATAGC | TCTTTTAGGAGGCGGTTAG  |
| <i>PTHLH</i><br><i>upstream SBR</i> | GAGAGGAGAGGATATGAACG | ATATAGACAGAGCGGGCTTC |

Primers used for RT-qPCR are as follows:

| Gene symbols    | Sense primers (5'-3')  | Antisense primers (5'-3') |
|-----------------|------------------------|---------------------------|
| <i>CDKN1A</i>   | CTGCCCAAGCTCTACCTTCC   | CAGGTCCACATGGTCTTCTT      |
| <i>SERPINE1</i> | GGCTGACTTCACGAGTCTTTCA | ATGCGGGCTGAGACTATGACA     |
| <i>GAPDH</i>    | GAAGGTGAAGGTCGGAGTC    | GAAGATGGTGATGGGATTTTC     |

|                     |                        |                       |
|---------------------|------------------------|-----------------------|
| <i>Smad2</i>        | CTCCAATGTTAACCGAAATGCC | GGCACTCAGCAAAAACCTCCC |
| <i>Smad3</i>        | GGACGACTACAGCCATTCCA   | TTCCGATGTGTCTCCGTGTCA |
| <i>MMP9</i>         | CTACCACCTCGAACTTTGAC   | GGCACTGAGGAATGATCTAA  |
| <i>ID1</i>          | CTGCTCTACGACATGAACGGC  | TGACGTGCTGGAGAATCTCCA |
| <i>MYLK</i>         | GCGATTTAGAAGTTGTGGAG   | CCTGATTGACTGGTCATCTT  |
| <i>DST</i>          | TCGGCTGATTAGACAGATTC   | CGTCCAGCTCTTTCTTTAG   |
| <i>CST6</i>         | CATCAAGTACTTCCTGACGA   | ACAAGGACCTCAAAGTCACA  |
| <i>CDC6</i>         | GCCAGACTATTCTCAAACCA   | CAAGGTCATCCTGTTACCAT  |
| <i>Fibronectin1</i> | GAGCCATGTGTCTTACCATT   | AGTATTTCTGGTCCTGCTCA  |
| <i>PTH1H</i>        | AGACTGGTTCAGCAGTGGA    | CTGATGTTTCAGACACAGCTC |
| * <i>JUN</i>        | ACGGACTGTTCTATGACTGC   | GTCATGCTCTGTTTCAGGAT  |
| * <i>JUNB</i>       | GTGCACTAAAATGGAACAGC   | CTCGGTTTCAGGAGTTTGTA  |
| * <i>EEF1D</i>      | GGAAGCTACAGATTCAGTGTG  | TCAAACCTGGTGATCTCCTC  |

## SUPPLEMENTAL FIGURE LEGENDS

Supplemental FIG. S1. Immunoprecipitation followed by immunoblotting of Smad family members by the antibody used for ChIP-chip. COS7 cells were transfected with FLAG-tagged Smad1 through 8 as indicated. Twenty-four hours later, cells were harvested, lysed, and equal amounts of lysates were immunoprecipitated by anti-Smad2/3 or mouse control IgG<sub>1</sub>. The upper panel shows immunoprecipitated Smad2/3 while the lower panel shows 5% input of each Smad protein. IP: immunoprecipitation, IB: immunoblotting.

Supplemental FIG. S2 *CDC6* as a novel, slowly down-regulated target of TGF- $\beta$  signaling. (A) Schematic representation of Smad binding region upstream of *CDC6* promoter. Smad binding region, its peak position, and MAT scores are represented as in Figure 1B. (B) Validation of Smad2/3 binding to the *CDC6* promoter by ChIP-qPCR. HaCaT cells were treated as in Figure 1A, and binding of Smad2/3 to the promoter was determined. Error bars represent the S.D. (C) TGF- $\beta$ -induced transcriptional response of the *CDC6* gene. HaCaT cells were stimulated with TGF- $\beta$ , and total RNA was extracted as in Figure 2C. Levels of *CDC6* expression were determined by RT-qPCR and normalized to *GAPDH*. Error bars represent the S.D.

Supplemental FIG. S3. Validation of binding of JUN, ETS1, and TFAP2A to Smad binding regions by ChIP-qPCR. HaCaT cells were treated as in Figure 1C, and sheared chromatin was immunoprecipitated by anti-JUN, anti-ETS1, or anti-TFAP2A antibodies. Anti-Smad2/3 was also used as a control. TGF- $\beta$ -induced binding of each transcription

factor to the indicated promoter regions is shown as a heat map. All basal bindings of the transcription factors to the regions were greater than control IgG (data not shown). Control: regions where Smad binding signals were not significant.

Supplemental FIG. S4. Identification of SBRs in the *PTH LH* promoter. **(A)** Schematic representation of Smad binding region upstream of the *PTH LH* promoter. Smad binding region, its peak position, and MAT scores are shown as in Figure 1B. P3: promoters analyzed by Lindermann et al (37). **(B)** Validation of Smad2/3 binding to the *PTH LH* promoter by ChIP-qPCR. HaCaT cells were treated as in Figure 1A, and binding of Smad2/3 to the promoter was determined. Error bars represent the S.D. **(C)** Effects of JUN, ETS1, or TFAP2A siRNAs on *PTH LH* mRNA expression. HaCaT cells were transfected with the indicated siRNAs, and 30 hours later stimulated with or without 1 ng/ml of TGF- $\beta$ , followed by incubation for additional 24 hours. *SERPINE1* expression was determined by RT-qPCR and normalized by *GAPDH* expression. Error bars represent the S.D.

Supplemental FIG. S5. Physical interaction of Smad2/3 with ETS1/TFAP2A. **(A)** Detection of endogenous Smad2/3 bound to ETS1, TFAP2A, and JUN in HaCaT cells. Cells were treated with 3 ng/ml TGF- $\beta$  for 1.5 hours, and harvested. Smad2/3 co-immunoprecipitated with the respective antibodies indicated was detected (left, top panel). The lower three panels show immunoprecipitation of ETS1, TFAP2A, or JUN. The right panels show expression of Smad2/3, phospho-Smad2, phospho-Smad3, and loading control. **(B)** Interaction of ETS1 and TFAP2A with Smad2/3/4 in transfected COS7 cells. Cells were transfected with 6Myc-tagged ETS1 or TFAP2A and

FLAG-tagged Smad2 through 4 as indicated. Twenty-four hours later, cells were harvested, lysed, and equal amounts of lysates were immunoprecipitated by anti-FLAG. The upper panel shows immunoprecipitated ETS1 or TFAP2A and lower panels show expression of each protein. ALK-5-TD: constitutively active type I TGF- $\beta$  receptor.

Supplemental FIG. S6. TGF- $\beta$ -induced genes without identified SBRs can be either potential direct targets of Smad2/3 or indirect target genes. **(A)** Summary of the expression array results compared to putative SBRs determined by a lower cut-off threshold. SBRs were determined from the ChIP-chip data by cut-off value of  $p < 10^{-4}$  and FDR 10%. Obtained putative SBR data was mapped to nearby genes as in Fig. 2C. **(B)** Effect of cycloheximide (CHX) to TGF- $\beta$ -induced *Fibronectin 1* expression. HaCaT cells were pre-incubated with/without 5  $\mu$ M of CHX (SIGMA) for 1 h, stimulated with 3 ng/ml of TGF- $\beta$ , and harvested at indicated times. *Fibronectin 1* expression was determined by RT-qPCR and normalized by *GAPDH* expression. Error bars represent the S.D.

Supplemental TABLE S1. Complete list of Smad binding regions. We mapped MAT scores to positions in human genome assembly Hg 17 (NCBI Build 35). Both Bandwidth and MaxGap parameters were set to 250. Cutoff threshold p-value and FDR were set to  $1.0 \times 10^{-5}$  and 5%, respectively.

Supplemental TABLE S2. Complete list of annotated genes. We first determined peak signal positions within the SBRs. We then identified nearby known genes for each peak signal positions. Genes that have peak signal positions within 5 kb upstream from TSS

and the first intron of their promoters were selected. AFFY\_ID: probe IDs of Affymetrix human expression arrays.

Supplemental TABLE S3. Complete list of Smad binding regions at the lower threshold. We mapped MAT scores to positions in human genome assembly Hg 17 (NCBI Build 35). Both Bandwidth and MaxGap parameters were set to 250. Cutoff threshold p-value and FDR were set to  $1.0 \times 10^{-4}$  and 5%, respectively.

Supplemental TABLE S4. Complete list of annotated genes at the lower threshold. We first determined peak signal positions within the SBRs. We then identified nearby known genes for each peak signal positions. Genes that have peak signal positions within 5 kb upstream from transcription start sites and the first intron of their promoters were selected. AFFY\_ID: probe IDs of Affymetrix human expression arrays.

**SUPPLEMENTAL TABLE S1.** Complete list of Smad2/3 binding regions ( $p < 10^{-5}$ ).

| chromosome | start    | end      |
|------------|----------|----------|
| chr1       | 18870    | 19606    |
| chr1       | 6606819  | 6607793  |
| chr1       | 8019154  | 8020087  |
| chr1       | 8022221  | 8023184  |
| chr1       | 8874369  | 8875053  |
| chr1       | 9819032  | 9820769  |
| chr1       | 10687313 | 10688432 |
| chr1       | 11799324 | 11800334 |
| chr1       | 11973912 | 11974847 |
| chr1       | 12612314 | 12614045 |
| chr1       | 16230469 | 16231239 |
| chr1       | 16585130 | 16586022 |



|      |          |          |
|------|----------|----------|
| chr1 | 16586023 | 16586659 |
| chr1 | 16737795 | 16739275 |
| chr1 | 16811709 | 16813245 |
| chr1 | 16967796 | 16968713 |
| chr1 | 19996829 | 19997775 |
| chr1 | 22046289 | 22047212 |
| chr1 | 22071219 | 22072219 |
| chr1 | 22097620 | 22098326 |
| chr1 | 23268341 | 23269467 |
| chr1 | 24388654 | 24389486 |
| chr1 | 24390727 | 24391984 |
| chr1 | 24393581 | 24394639 |
| chr1 | 26367726 | 26368677 |
| chr1 | 26388402 | 26389353 |
| chr1 | 26702614 | 26704145 |
| chr1 | 26863834 | 26864874 |
| chr1 | 26871727 | 26874000 |
| chr1 | 26875384 | 26876362 |
| chr1 | 26917682 | 26918779 |
| chr1 | 27165483 | 27166326 |
| chr1 | 27500876 | 27501613 |
| chr1 | 29383546 | 29384611 |
| chr1 | 31564439 | 31565090 |
| chr1 | 31709198 | 31711342 |
| chr1 | 32951085 | 32951801 |
| chr1 | 33391473 | 33392268 |
| chr1 | 33567881 | 33568948 |
| chr1 | 33949332 | 33950226 |
| chr1 | 36284110 | 36285081 |
| chr1 | 36285082 | 36285955 |
| chr1 | 36434385 | 36435398 |
| chr1 | 36520469 | 36521990 |
| chr1 | 37606025 | 37607262 |
| chr1 | 37608457 | 37609203 |
| chr1 | 39251405 | 39252815 |
| chr1 | 41115336 | 41116099 |
| chr1 | 42300134 | 42301066 |
| chr1 | 43507502 | 43508571 |
| chr1 | 43671840 | 43672710 |
| chr1 | 44460936 | 44462016 |

|      |           |           |
|------|-----------|-----------|
| chr1 | 44941503  | 44943141  |
| chr1 | 45656261  | 45657420  |
| chr1 | 52729782  | 52730542  |
| chr1 | 53503327  | 53504216  |
| chr1 | 54585285  | 54587711  |
| chr1 | 54719157  | 54720840  |
| chr1 | 58753083  | 58754078  |
| chr1 | 58754541  | 58755806  |
| chr1 | 58761631  | 58762892  |
| chr1 | 62498892  | 62499849  |
| chr1 | 64349387  | 64350358  |
| chr1 | 67230471  | 67231144  |
| chr1 | 67860093  | 67861535  |
| chr1 | 67863948  | 67865148  |
| chr1 | 68009516  | 68010420  |
| chr1 | 72461976  | 72463043  |
| chr1 | 78156755  | 78157732  |
| chr1 | 84683713  | 84684593  |
| chr1 | 84810070  | 84811304  |
| chr1 | 84812522  | 84813709  |
| chr1 | 85379402  | 85380531  |
| chr1 | 85754144  | 85754823  |
| chr1 | 85757526  | 85758365  |
| chr1 | 93859140  | 93859968  |
| chr1 | 94477549  | 94478446  |
| chr1 | 94716825  | 94717646  |
| chr1 | 94718674  | 94719036  |
| chr1 | 98839600  | 98840382  |
| chr1 | 101072223 | 101072874 |
| chr1 | 108454953 | 108455675 |
| chr1 | 110731260 | 110732057 |
| chr1 | 110732058 | 110732972 |
| chr1 | 112718842 | 112719659 |
| chr1 | 112959467 | 112960445 |
| chr1 | 114159186 | 114160052 |
| chr1 | 114865104 | 114866084 |
| chr1 | 114923145 | 114923754 |
| chr1 | 115554473 | 115556023 |
| chr1 | 117160897 | 117162421 |
| chr1 | 120322724 | 120325317 |

|      |           |           |
|------|-----------|-----------|
| chr1 | 141466344 | 141467327 |
| chr1 | 141902851 | 141905402 |
| chr1 | 141916045 | 141918372 |
| chr1 | 141918744 | 141919760 |
| chr1 | 142083141 | 142085653 |
| chr1 | 142096294 | 142098587 |
| chr1 | 142099203 | 142099974 |
| chr1 | 142697128 | 142699760 |
| chr1 | 143232239 | 143233765 |
| chr1 | 143868459 | 143869677 |
| chr1 | 144372898 | 144374369 |
| chr1 | 145031624 | 145034135 |
| chr1 | 145044836 | 145047094 |
| chr1 | 145047491 | 145048507 |
| chr1 | 145335733 | 145337114 |
| chr1 | 146389256 | 146391548 |
| chr1 | 146402267 | 146404775 |
| chr1 | 146616794 | 146617859 |
| chr1 | 146625692 | 146628092 |
| chr1 | 146634974 | 146637374 |
| chr1 | 146645041 | 146646280 |
| chr1 | 146721778 | 146723137 |
| chr1 | 146723689 | 146724992 |
| chr1 | 147363543 | 147364899 |
| chr1 | 147855486 | 147857033 |
| chr1 | 147980489 | 147981393 |
| chr1 | 147983107 | 147983935 |
| chr1 | 148243213 | 148244374 |
| chr1 | 148298709 | 148299648 |
| chr1 | 148324753 | 148326210 |
| chr1 | 148777061 | 148779227 |
| chr1 | 148779286 | 148780347 |
| chr1 | 148784107 | 148785378 |
| chr1 | 148948156 | 148949146 |
| chr1 | 149177990 | 149179355 |
| chr1 | 149690184 | 149691148 |
| chr1 | 149691149 | 149692634 |
| chr1 | 149757920 | 149758869 |
| chr1 | 149811166 | 149812051 |
| chr1 | 149817995 | 149819309 |

|      |           |           |
|------|-----------|-----------|
| chr1 | 150350612 | 150353049 |
| chr1 | 150353050 | 150354921 |
| chr1 | 150708226 | 150709407 |
| chr1 | 151203434 | 151204746 |
| chr1 | 151823639 | 151824670 |
| chr1 | 151909698 | 151911915 |
| chr1 | 151911916 | 151913353 |
| chr1 | 151914896 | 151915957 |
| chr1 | 152027009 | 152028062 |
| chr1 | 153487643 | 153488296 |
| chr1 | 156706952 | 156708918 |
| chr1 | 157803732 | 157804934 |
| chr1 | 157915150 | 157916557 |
| chr1 | 162332498 | 162333403 |
| chr1 | 164363636 | 164364569 |
| chr1 | 164490538 | 164491284 |
| chr1 | 166068460 | 166069600 |
| chr1 | 166186821 | 166187714 |
| chr1 | 169752982 | 169754320 |
| chr1 | 171898080 | 171898959 |
| chr1 | 174795788 | 174796801 |
| chr1 | 175041739 | 175042842 |
| chr1 | 175237320 | 175238516 |
| chr1 | 175841819 | 175843410 |
| chr1 | 175843525 | 175844717 |
| chr1 | 175934969 | 175935886 |
| chr1 | 176654903 | 176655693 |
| chr1 | 177722519 | 177723299 |
| chr1 | 179663148 | 179663984 |
| chr1 | 179722639 | 179723908 |
| chr1 | 179886153 | 179887503 |
| chr1 | 180170806 | 180171881 |
| chr1 | 182017593 | 182019375 |
| chr1 | 194476281 | 194477031 |
| chr1 | 197870639 | 197872106 |
| chr1 | 198098024 | 198098938 |
| chr1 | 199665513 | 199666671 |
| chr1 | 200003787 | 200004875 |
| chr1 | 200561250 | 200562079 |
| chr1 | 200872020 | 200873078 |

|       |           |           |
|-------|-----------|-----------|
| chr1  | 201194062 | 201195216 |
| chr1  | 201822424 | 201823542 |
| chr1  | 202200732 | 202201641 |
| chr1  | 202450494 | 202451654 |
| chr1  | 203065780 | 203066449 |
| chr1  | 203456724 | 203458081 |
| chr1  | 203466797 | 203467840 |
| chr1  | 203593086 | 203594098 |
| chr1  | 203612622 | 203613972 |
| chr1  | 203614155 | 203615336 |
| chr1  | 203877875 | 203878722 |
| chr1  | 203882574 | 203883924 |
| chr1  | 204780623 | 204782224 |
| chr1  | 204782243 | 204783338 |
| chr1  | 206149191 | 206150194 |
| chr1  | 206213546 | 206215127 |
| chr1  | 206216854 | 206218344 |
| chr1  | 206218492 | 206220228 |
| chr1  | 206369623 | 206370451 |
| chr1  | 206370901 | 206372172 |
| chr1  | 206384413 | 206386404 |
| chr1  | 206386933 | 206388457 |
| chr1  | 206794063 | 206794976 |
| chr1  | 208596569 | 208597435 |
| chr1  | 209169459 | 209171097 |
| chr1  | 211119493 | 211120526 |
| chr1  | 218303655 | 218304685 |
| chr1  | 220201254 | 220202608 |
| chr1  | 222149415 | 222150630 |
| chr1  | 224440174 | 224441241 |
| chr1  | 225089515 | 225090651 |
| chr1  | 225710625 | 225711582 |
| chr1  | 230057813 | 230058836 |
| chr1  | 231049964 | 231050996 |
| chr1  | 231052834 | 231053642 |
| chr1  | 231053643 | 231056018 |
| chr1  | 231992637 | 231993464 |
| chr1  | 233013539 | 233014186 |
| chr1  | 240842773 | 240843920 |
| chr10 | 3814582   | 3815860   |

|       |          |          |
|-------|----------|----------|
| chr10 | 4988917  | 4989886  |
| chr10 | 5040895  | 5042010  |
| chr10 | 5477300  | 5478091  |
| chr10 | 8135598  | 8136432  |
| chr10 | 8697800  | 8698992  |
| chr10 | 8700411  | 8701702  |
| chr10 | 14683707 | 14684490 |
| chr10 | 17309742 | 17311028 |
| chr10 | 21845681 | 21846697 |
| chr10 | 23674666 | 23675515 |
| chr10 | 24812200 | 24813300 |
| chr10 | 24817270 | 24818334 |
| chr10 | 25050668 | 25051718 |
| chr10 | 27487172 | 27488021 |
| chr10 | 29963566 | 29964889 |
| chr10 | 30020175 | 30021303 |
| chr10 | 33287256 | 33288050 |
| chr10 | 33290681 | 33291507 |
| chr10 | 42000388 | 42001485 |
| chr10 | 46188656 | 46189634 |
| chr10 | 46570857 | 46573599 |
| chr10 | 46590616 | 46593035 |
| chr10 | 46593117 | 46594795 |
| chr10 | 47216223 | 47217946 |
| chr10 | 47217981 | 47219852 |
| chr10 | 47237543 | 47239351 |
| chr10 | 47239352 | 47240121 |
| chr10 | 47874541 | 47876263 |
| chr10 | 47876830 | 47878717 |
| chr10 | 47895871 | 47897679 |
| chr10 | 47897680 | 47898449 |
| chr10 | 48571960 | 48572771 |
| chr10 | 48578541 | 48579405 |
| chr10 | 48865276 | 48868854 |
| chr10 | 48868976 | 48870573 |
| chr10 | 49131638 | 49132492 |
| chr10 | 49277592 | 49279225 |
| chr10 | 51822533 | 51823672 |
| chr10 | 52033723 | 52034728 |
| chr10 | 52051274 | 52052220 |

|       |           |           |
|-------|-----------|-----------|
| chr10 | 53128800  | 53129768  |
| chr10 | 59765100  | 59766524  |
| chr10 | 61394788  | 61396000  |
| chr10 | 63475595  | 63476649  |
| chr10 | 64246496  | 64247343  |
| chr10 | 64698343  | 64699625  |
| chr10 | 64894992  | 64896656  |
| chr10 | 69762365  | 69763239  |
| chr10 | 70876119  | 70877390  |
| chr10 | 71661739  | 71662493  |
| chr10 | 71904737  | 71906529  |
| chr10 | 72245856  | 72247026  |
| chr10 | 75159441  | 75160203  |
| chr10 | 75301614  | 75302429  |
| chr10 | 75336028  | 75336996  |
| chr10 | 75338535  | 75339665  |
| chr10 | 75428921  | 75429773  |
| chr10 | 75606492  | 75607425  |
| chr10 | 76637351  | 76638808  |
| chr10 | 80498391  | 80499230  |
| chr10 | 82001287  | 82002157  |
| chr10 | 82162788  | 82163820  |
| chr10 | 88397233  | 88398438  |
| chr10 | 88708422  | 88709397  |
| chr10 | 88831513  | 88832557  |
| chr10 | 88844945  | 88845657  |
| chr10 | 90559143  | 90560276  |
| chr10 | 92670328  | 92671835  |
| chr10 | 95186543  | 95187417  |
| chr10 | 95188130  | 95188967  |
| chr10 | 95231754  | 95232821  |
| chr10 | 97044697  | 97045697  |
| chr10 | 99321170  | 99321918  |
| chr10 | 99324071  | 99324934  |
| chr10 | 99463381  | 99464407  |
| chr10 | 100018632 | 100019962 |
| chr10 | 101369941 | 101370774 |
| chr10 | 101370775 | 101371755 |
| chr10 | 101411014 | 101411868 |
| chr10 | 101726397 | 101727372 |

|       |           |           |
|-------|-----------|-----------|
| chr10 | 102035027 | 102037459 |
| chr10 | 102114419 | 102115190 |
| chr10 | 102120479 | 102121570 |
| chr10 | 104395270 | 104396675 |
| chr10 | 104990911 | 104991792 |
| chr10 | 105228628 | 105229415 |
| chr10 | 105445853 | 105446928 |
| chr10 | 105835032 | 105836132 |
| chr10 | 105840318 | 105841179 |
| chr10 | 105867460 | 105868402 |
| chr10 | 105869176 | 105870338 |
| chr10 | 105870339 | 105871696 |
| chr10 | 106084726 | 106085686 |
| chr10 | 116151636 | 116152936 |
| chr10 | 116275055 | 116275780 |
| chr10 | 116275781 | 116276663 |
| chr10 | 124123189 | 124124379 |
| chr10 | 127565454 | 127566423 |
| chr10 | 127651422 | 127652529 |
| chr10 | 133595450 | 133596174 |
| chr10 | 134196018 | 134197232 |
| chr10 | 135392109 | 135393211 |
| chr11 | 163813    | 165081    |
| chr11 | 399951    | 401171    |
| chr11 | 496543    | 497428    |
| chr11 | 687273    | 688528    |
| chr11 | 824105    | 825480    |
| chr11 | 1804821   | 1805871   |
| chr11 | 1806461   | 1807277   |
| chr11 | 1808240   | 1809135   |
| chr11 | 2906729   | 2908347   |
| chr11 | 3399039   | 3400033   |
| chr11 | 6367428   | 6368073   |
| chr11 | 8696403   | 8698171   |
| chr11 | 8792020   | 8793210   |
| chr11 | 8884401   | 8885542   |
| chr11 | 9438626   | 9439514   |
| chr11 | 9543656   | 9545076   |
| chr11 | 9546663   | 9547853   |
| chr11 | 10281510  | 10282632  |



|       |          |          |
|-------|----------|----------|
| chr11 | 10284774 | 10285926 |
| chr11 | 11983190 | 11984027 |
| chr11 | 12265626 | 12266489 |
| chr11 | 13248944 | 13249720 |
| chr11 | 13440049 | 13440819 |
| chr11 | 13641411 | 13642657 |
| chr11 | 16990676 | 16991525 |
| chr11 | 19690290 | 19690965 |
| chr11 | 20013294 | 20014539 |
| chr11 | 27018318 | 27019105 |
| chr11 | 32807343 | 32808259 |
| chr11 | 32990044 | 32990375 |
| chr11 | 33700618 | 33701823 |
| chr11 | 34598726 | 34599699 |
| chr11 | 35117159 | 35118146 |
| chr11 | 44074448 | 44075394 |
| chr11 | 44840002 | 44841253 |
| chr11 | 47194158 | 47195204 |
| chr11 | 47385679 | 47386598 |
| chr11 | 58101241 | 58102867 |
| chr11 | 59310861 | 59311651 |
| chr11 | 59900199 | 59901118 |
| chr11 | 60821238 | 60822451 |
| chr11 | 61344034 | 61344923 |
| chr11 | 61496157 | 61497717 |
| chr11 | 62071652 | 62072680 |
| chr11 | 62076438 | 62077411 |
| chr11 | 62077412 | 62078230 |
| chr11 | 62115282 | 62116162 |
| chr11 | 63764104 | 63765070 |
| chr11 | 63769319 | 63770115 |
| chr11 | 63858752 | 63859784 |
| chr11 | 64530544 | 64531492 |
| chr11 | 64905453 | 64907363 |
| chr11 | 65015487 | 65016479 |
| chr11 | 65023893 | 65025505 |
| chr11 | 65027643 | 65029008 |
| chr11 | 65081166 | 65081989 |
| chr11 | 65083735 | 65085448 |
| chr11 | 65310464 | 65311239 |

|       |           |           |
|-------|-----------|-----------|
| chr11 | 65315950  | 65317749  |
| chr11 | 65424313  | 65425231  |
| chr11 | 65439292  | 65440475  |
| chr11 | 65536386  | 65537749  |
| chr11 | 65860334  | 65861376  |
| chr11 | 66291901  | 66292674  |
| chr11 | 66429786  | 66430579  |
| chr11 | 66481946  | 66483024  |
| chr11 | 66494660  | 66495708  |
| chr11 | 66578926  | 66580426  |
| chr11 | 66876960  | 66878071  |
| chr11 | 66897706  | 66899064  |
| chr11 | 66902899  | 66904268  |
| chr11 | 67328287  | 67329236  |
| chr11 | 68811732  | 68813390  |
| chr11 | 69604208  | 69605406  |
| chr11 | 71008105  | 71008788  |
| chr11 | 71176510  | 71177468  |
| chr11 | 72201620  | 72202694  |
| chr11 | 72765450  | 72766381  |
| chr11 | 74331290  | 74332374  |
| chr11 | 76176947  | 76177795  |
| chr11 | 85457742  | 85459348  |
| chr11 | 86190936  | 86191971  |
| chr11 | 87551543  | 87552783  |
| chr11 | 87783168  | 87784449  |
| chr11 | 87787704  | 87788720  |
| chr11 | 94140452  | 94141377  |
| chr11 | 95162522  | 95163354  |
| chr11 | 95471423  | 95472487  |
| chr11 | 100060641 | 100061620 |
| chr11 | 101487405 | 101488601 |
| chr11 | 101692922 | 101693875 |
| chr11 | 102155841 | 102157372 |
| chr11 | 102159380 | 102160569 |
| chr11 | 102226943 | 102227945 |
| chr11 | 102333572 | 102334548 |
| chr11 | 104422569 | 104423661 |
| chr11 | 107233605 | 107234214 |
| chr11 | 107873102 | 107874089 |

|       |           |           |
|-------|-----------|-----------|
| chr11 | 111254625 | 111255910 |
| chr11 | 111538672 | 111539552 |
| chr11 | 113153712 | 113154651 |
| chr11 | 117639672 | 117640952 |
| chr11 | 117984282 | 117985104 |
| chr11 | 118265529 | 118266542 |
| chr11 | 118286104 | 118287323 |
| chr11 | 118287842 | 118289028 |
| chr11 | 118582544 | 118583331 |
| chr11 | 124457711 | 124458997 |
| chr11 | 125777959 | 125778811 |
| chr11 | 127897331 | 127898329 |
| chr11 | 128398723 | 128399674 |
| chr11 | 128436661 | 128437802 |
| chr11 | 129377778 | 129378595 |
| chr11 | 129411865 | 129412759 |
| chr12 | 6251523   | 6252607   |
| chr12 | 6324545   | 6325411   |
| chr12 | 6351905   | 6352961   |
| chr12 | 6615072   | 6616267   |
| chr12 | 10219437  | 10220820  |
| chr12 | 10223220  | 10224308  |
| chr12 | 10255838  | 10256817  |
| chr12 | 10347414  | 10348558  |
| chr12 | 10465760  | 10466818  |
| chr12 | 10481184  | 10482278  |
| chr12 | 12915913  | 12917669  |
| chr12 | 12934475  | 12936114  |
| chr12 | 13141997  | 13143924  |
| chr12 | 13144521  | 13145389  |
| chr12 | 13240055  | 13241415  |
| chr12 | 15005354  | 15006393  |
| chr12 | 18734761  | 18735803  |
| chr12 | 24991005  | 24991784  |
| chr12 | 25098009  | 25099592  |
| chr12 | 28013748  | 28014774  |
| chr12 | 28017297  | 28020606  |
| chr12 | 32941102  | 32942122  |
| chr12 | 43895330  | 43896267  |
| chr12 | 44408461  | 44409252  |

|       |           |           |
|-------|-----------|-----------|
| chr12 | 45051235  | 45052314  |
| chr12 | 45760674  | 45761870  |
| chr12 | 45765648  | 45766472  |
| chr12 | 46448132  | 46449237  |
| chr12 | 48881698  | 48882665  |
| chr12 | 48900012  | 48901001  |
| chr12 | 50871880  | 50872702  |
| chr12 | 50909954  | 50911655  |
| chr12 | 51120964  | 51121881  |
| chr12 | 51172991  | 51174006  |
| chr12 | 51174007  | 51174672  |
| chr12 | 51200259  | 51201224  |
| chr12 | 51201280  | 51202828  |
| chr12 | 51478986  | 51479920  |
| chr12 | 51480609  | 51481470  |
| chr12 | 52675035  | 52675964  |
| chr12 | 52701363  | 52702044  |
| chr12 | 55620388  | 55622204  |
| chr12 | 55636785  | 55638236  |
| chr12 | 55664865  | 55666403  |
| chr12 | 55845413  | 55846338  |
| chr12 | 63132298  | 63133227  |
| chr12 | 63849979  | 63851318  |
| chr12 | 64328381  | 64329847  |
| chr12 | 67488644  | 67489601  |
| chr12 | 67918785  | 67919833  |
| chr12 | 69318691  | 69319741  |
| chr12 | 70520082  | 70520980  |
| chr12 | 74009629  | 74010538  |
| chr12 | 78587168  | 78588682  |
| chr12 | 88248312  | 88249452  |
| chr12 | 91040370  | 91041534  |
| chr12 | 95091430  | 95092513  |
| chr12 | 95381172  | 95382102  |
| chr12 | 95383233  | 95384204  |
| chr12 | 103182083 | 103184057 |
| chr12 | 107625821 | 107627190 |
| chr12 | 113584159 | 113585336 |
| chr12 | 120691944 | 120693119 |
| chr12 | 120699663 | 120700918 |

|       |           |           |
|-------|-----------|-----------|
| chr12 | 121431938 | 121432512 |
| chr12 | 121712393 | 121713187 |
| chr12 | 121730326 | 121731214 |
| chr12 | 121761629 | 121762440 |
| chr12 | 121839935 | 121840770 |
| chr12 | 122103780 | 122104692 |
| chr12 | 123923254 | 123924418 |
| chr12 | 123926238 | 123927105 |
| chr12 | 129348959 | 129349941 |
| chr13 | 23428151  | 23429208  |
| chr13 | 23983305  | 23985032  |
| chr13 | 26897699  | 26898840  |
| chr13 | 27092916  | 27093882  |
| chr13 | 29066021  | 29067967  |
| chr13 | 30089551  | 30090279  |
| chr13 | 40532233  | 40533114  |
| chr13 | 40533260  | 40534207  |
| chr13 | 41513131  | 41514156  |
| chr13 | 43631281  | 43632505  |
| chr13 | 44049308  | 44050300  |
| chr13 | 49058778  | 49060097  |
| chr13 | 51275250  | 51276610  |
| chr13 | 95126263  | 95127078  |
| chr13 | 95127756  | 95128683  |
| chr13 | 96723185  | 96724281  |
| chr13 | 96724816  | 96726211  |
| chr13 | 98032908  | 98033740  |
| chr13 | 100899954 | 100901342 |
| chr13 | 100904098 | 100905720 |
| chr13 | 109762631 | 109763559 |
| chr13 | 110319872 | 110321327 |
| chr13 | 110365179 | 110365794 |
| chr13 | 113151296 | 113152013 |
| chr13 | 113195437 | 113196370 |
| chr14 | 20007588  | 20008676  |
| chr14 | 20525457  | 20526222  |
| chr14 | 21453581  | 21454332  |
| chr14 | 21455511  | 21456156  |
| chr14 | 22709899  | 22710865  |
| chr14 | 23652757  | 23653628  |

|       |          |          |
|-------|----------|----------|
| chr14 | 34412339 | 34412956 |
| chr14 | 36736568 | 36737610 |
| chr14 | 37133887 | 37135997 |
| chr14 | 38805306 | 38806158 |
| chr14 | 49766814 | 49767822 |
| chr14 | 50204097 | 50204745 |
| chr14 | 51188141 | 51188775 |
| chr14 | 52236587 | 52237990 |
| chr14 | 53977595 | 53978420 |
| chr14 | 54663550 | 54664877 |
| chr14 | 55077147 | 55078248 |
| chr14 | 57029000 | 57029686 |
| chr14 | 57834358 | 57835200 |
| chr14 | 58173125 | 58174375 |
| chr14 | 60858999 | 60859943 |
| chr14 | 63177855 | 63178972 |
| chr14 | 63390103 | 63391015 |
| chr14 | 64075379 | 64076414 |
| chr14 | 64235008 | 64236031 |
| chr14 | 64239304 | 64240453 |
| chr14 | 64240454 | 64240994 |
| chr14 | 64298031 | 64299387 |
| chr14 | 66895615 | 66896807 |
| chr14 | 66947840 | 66949420 |
| chr14 | 66950016 | 66951537 |
| chr14 | 67209953 | 67210594 |
| chr14 | 67253098 | 67253792 |
| chr14 | 68329884 | 68331059 |
| chr14 | 68513556 | 68514470 |
| chr14 | 68615212 | 68616805 |
| chr14 | 69147545 | 69148153 |
| chr14 | 70177135 | 70178462 |
| chr14 | 72594286 | 72595338 |
| chr14 | 73073830 | 73075050 |
| chr14 | 73105835 | 73106896 |
| chr14 | 73249978 | 73251853 |
| chr14 | 73322100 | 73322711 |
| chr14 | 74151086 | 74152086 |
| chr14 | 74152606 | 74154435 |
| chr14 | 74155328 | 74156520 |

|       |           |           |
|-------|-----------|-----------|
| chr14 | 74604998  | 74605844  |
| chr14 | 76497350  | 76498771  |
| chr14 | 76564510  | 76565597  |
| chr14 | 76569239  | 76570390  |
| chr14 | 76633174  | 76634449  |
| chr14 | 80756812  | 80758102  |
| chr14 | 80935847  | 80936979  |
| chr14 | 80936980  | 80938093  |
| chr14 | 88089711  | 88090696  |
| chr14 | 92043098  | 92043921  |
| chr14 | 92047409  | 92048171  |
| chr14 | 92867779  | 92868897  |
| chr14 | 93494973  | 93496743  |
| chr14 | 102908314 | 102909314 |
| chr14 | 102922263 | 102922944 |
| chr14 | 102923074 | 102923726 |
| chr14 | 104217655 | 104218947 |
| chr14 | 104558678 | 104559519 |
| chr14 | 105027980 | 105029039 |
| chr15 | 27900618  | 27901516  |
| chr15 | 28704424  | 28706023  |
| chr15 | 30693880  | 30695564  |
| chr15 | 31093028  | 31093963  |
| chr15 | 31147371  | 31149099  |
| chr15 | 36330683  | 36331916  |
| chr15 | 37327438  | 37328496  |
| chr15 | 37658449  | 37660815  |
| chr15 | 38183993  | 38184761  |
| chr15 | 38318330  | 38319773  |
| chr15 | 38848651  | 38849789  |
| chr15 | 38925029  | 38926094  |
| chr15 | 40353350  | 40354196  |
| chr15 | 40570198  | 40571124  |
| chr15 | 40574094  | 40575294  |
| chr15 | 40758458  | 40759384  |
| chr15 | 41671866  | 41672902  |
| chr15 | 41771698  | 41772765  |
| chr15 | 42366984  | 42368376  |
| chr15 | 49907863  | 49909000  |
| chr15 | 50050887  | 50051758  |

|       |          |          |
|-------|----------|----------|
| chr15 | 50099003 | 50100214 |
| chr15 | 50100339 | 50101059 |
| chr15 | 50258416 | 50259099 |
| chr15 | 53996373 | 53998012 |
| chr15 | 54073159 | 54073994 |
| chr15 | 54078811 | 54079706 |
| chr15 | 54998888 | 55000031 |
| chr15 | 57279209 | 57280256 |
| chr15 | 58470009 | 58471654 |
| chr15 | 58471655 | 58473325 |
| chr15 | 58476092 | 58477473 |
| chr15 | 58477474 | 58478457 |
| chr15 | 58478498 | 58479329 |
| chr15 | 60143124 | 60144351 |
| chr15 | 63875356 | 63876707 |
| chr15 | 64781537 | 64782402 |
| chr15 | 65127853 | 65129018 |
| chr15 | 65144764 | 65145601 |
| chr15 | 66350756 | 66352160 |
| chr15 | 66354381 | 66355248 |
| chr15 | 66433866 | 66434925 |
| chr15 | 68874257 | 68875416 |
| chr15 | 69868968 | 69870489 |
| chr15 | 70310719 | 70311866 |
| chr15 | 70316386 | 70317343 |
| chr15 | 70735269 | 70736059 |
| chr15 | 71712887 | 71714610 |
| chr15 | 72067231 | 72068136 |
| chr15 | 72068642 | 72069472 |
| chr15 | 72159936 | 72160863 |
| chr15 | 72272034 | 72273547 |
| chr15 | 72275070 | 72276400 |
| chr15 | 72279457 | 72281578 |
| chr15 | 72294072 | 72294840 |
| chr15 | 72614227 | 72614993 |
| chr15 | 72614994 | 72615680 |
| chr15 | 72619759 | 72620671 |
| chr15 | 73187503 | 73188473 |
| chr15 | 73280194 | 73281127 |
| chr15 | 73363395 | 73364227 |



|       |           |           |
|-------|-----------|-----------|
| chr15 | 73529239  | 73530440  |
| chr15 | 73915962  | 73916864  |
| chr15 | 76952463  | 76953504  |
| chr15 | 77030705  | 77032032  |
| chr15 | 77083465  | 77084483  |
| chr15 | 78515645  | 78516728  |
| chr15 | 78856172  | 78858276  |
| chr15 | 80125387  | 80126381  |
| chr15 | 80820086  | 80820891  |
| chr15 | 81741949  | 81742694  |
| chr15 | 81744331  | 81745246  |
| chr15 | 81745430  | 81746893  |
| chr15 | 81746894  | 81747694  |
| chr15 | 81747695  | 81749507  |
| chr15 | 82689825  | 82690723  |
| chr15 | 83091455  | 83092726  |
| chr15 | 83723885  | 83724956  |
| chr15 | 86966993  | 86967969  |
| chr15 | 87431727  | 87432978  |
| chr15 | 87679123  | 87679909  |
| chr15 | 87846790  | 87848091  |
| chr15 | 89213583  | 89214645  |
| chr15 | 89216438  | 89217959  |
| chr15 | 97256715  | 97258872  |
| chr15 | 97922910  | 97923997  |
| chr15 | 99276011  | 99276968  |
| chr15 | 100318919 | 100319655 |
| chr16 | 1368590   | 1369692   |
| chr16 | 2153114   | 2153979   |
| chr16 | 2848044   | 2849073   |
| chr16 | 3010128   | 3011515   |
| chr16 | 3011516   | 3012276   |
| chr16 | 3013215   | 3013825   |
| chr16 | 4933074   | 4933990   |
| chr16 | 5086764   | 5087465   |
| chr16 | 5087654   | 5088539   |
| chr16 | 11917429  | 11918450  |
| chr16 | 11937416  | 11938398  |
| chr16 | 14707973  | 14709367  |
| chr16 | 14709694  | 14710988  |

|       |          |          |
|-------|----------|----------|
| chr16 | 14718026 | 14719008 |
| chr16 | 14747095 | 14748489 |
| chr16 | 14748816 | 14750110 |
| chr16 | 14757150 | 14758132 |
| chr16 | 14943770 | 14944728 |
| chr16 | 15118905 | 15119786 |
| chr16 | 15373617 | 15374575 |
| chr16 | 15381693 | 15383034 |
| chr16 | 15383307 | 15384697 |
| chr16 | 15645014 | 15646098 |
| chr16 | 15646295 | 15647221 |
| chr16 | 16342461 | 16343245 |
| chr16 | 16385819 | 16386603 |
| chr16 | 18779202 | 18780074 |
| chr16 | 19436200 | 19436921 |
| chr16 | 19439285 | 19440443 |
| chr16 | 19473780 | 19474595 |
| chr16 | 20823328 | 20824309 |
| chr16 | 21332297 | 21333279 |
| chr16 | 21343212 | 21344497 |
| chr16 | 21344786 | 21346240 |
| chr16 | 21368123 | 21369182 |
| chr16 | 21436727 | 21437701 |
| chr16 | 21437702 | 21439547 |
| chr16 | 21764753 | 21765735 |
| chr16 | 21775489 | 21776777 |
| chr16 | 21777037 | 21778520 |
| chr16 | 22407340 | 22408399 |
| chr16 | 22430278 | 22431732 |
| chr16 | 22431981 | 22433309 |
| chr16 | 22443244 | 22444226 |
| chr16 | 22731722 | 22733136 |
| chr16 | 22734907 | 22736035 |
| chr16 | 27245382 | 27246431 |
| chr16 | 28270225 | 28271199 |
| chr16 | 28280932 | 28282220 |
| chr16 | 28384061 | 28385040 |
| chr16 | 28555546 | 28556092 |
| chr16 | 28556785 | 28557870 |
| chr16 | 28567615 | 28568573 |

|       |          |          |
|-------|----------|----------|
| chr16 | 28670653 | 28671981 |
| chr16 | 28681731 | 28682719 |
| chr16 | 28961682 | 28962661 |
| chr16 | 29311288 | 29312270 |
| chr16 | 29321912 | 29323200 |
| chr16 | 29323597 | 29324474 |
| chr16 | 29324475 | 29324928 |
| chr16 | 29346836 | 29347858 |
| chr16 | 29372619 | 29373524 |
| chr16 | 29412819 | 29413801 |
| chr16 | 29423702 | 29425042 |
| chr16 | 29425277 | 29426712 |
| chr16 | 29448749 | 29449664 |
| chr16 | 29530175 | 29531007 |
| chr16 | 29531008 | 29532408 |
| chr16 | 30111961 | 30112827 |
| chr16 | 30152791 | 30153773 |
| chr16 | 30163684 | 30164972 |
| chr16 | 30165260 | 30166695 |
| chr16 | 30188734 | 30189649 |
| chr16 | 30868561 | 30869430 |
| chr16 | 45279328 | 45280438 |
| chr16 | 51643621 | 51644565 |
| chr16 | 51689674 | 51692098 |
| chr16 | 53520682 | 53521437 |
| chr16 | 54062313 | 54063665 |
| chr16 | 54159524 | 54160174 |
| chr16 | 55197311 | 55200509 |
| chr16 | 55452300 | 55453400 |
| chr16 | 55682394 | 55683512 |
| chr16 | 55782056 | 55783112 |
| chr16 | 56210606 | 56212305 |
| chr16 | 56392446 | 56393447 |
| chr16 | 56399133 | 56400144 |
| chr16 | 56401053 | 56402354 |
| chr16 | 56403504 | 56404718 |
| chr16 | 56406054 | 56407245 |
| chr16 | 56407418 | 56408513 |
| chr16 | 66855991 | 66857606 |
| chr16 | 67227193 | 67228427 |

|       |          |          |
|-------|----------|----------|
| chr16 | 68576301 | 68577283 |
| chr16 | 68586880 | 68588169 |
| chr16 | 68588464 | 68589473 |
| chr16 | 68589474 | 68589896 |
| chr16 | 68813487 | 68814511 |
| chr16 | 70486026 | 70487250 |
| chr16 | 72973573 | 72974531 |
| chr16 | 74077040 | 74077981 |
| chr16 | 80037380 | 80038205 |
| chr16 | 80084501 | 80085490 |
| chr16 | 81218879 | 81220141 |
| chr16 | 83091951 | 83093192 |
| chr16 | 83209601 | 83210429 |
| chr16 | 83619590 | 83621110 |
| chr16 | 84205762 | 84206750 |
| chr16 | 86089935 | 86090692 |
| chr16 | 86457476 | 86459032 |
| chr16 | 86459033 | 86460621 |
| chr16 | 88515367 | 88516619 |
| chr16 | 88716492 | 88717746 |
| chr16 | 88814186 | 88815087 |
| chr17 | 181842   | 183546   |
| chr17 | 578735   | 579381   |
| chr17 | 579428   | 580299   |
| chr17 | 827601   | 828751   |
| chr17 | 960763   | 961763   |
| chr17 | 964771   | 965848   |
| chr17 | 1564640  | 1565545  |
| chr17 | 2254885  | 2255966  |
| chr17 | 2255967  | 2257949  |
| chr17 | 3738389  | 3739483  |
| chr17 | 4789002  | 4789982  |
| chr17 | 4792824  | 4794074  |
| chr17 | 5428226  | 5429533  |
| chr17 | 6486070  | 6487749  |
| chr17 | 7063949  | 7064796  |
| chr17 | 7106519  | 7107519  |
| chr17 | 7195532  | 7196924  |
| chr17 | 7198126  | 7199167  |
| chr17 | 7682908  | 7683857  |

|       |          |          |
|-------|----------|----------|
| chr17 | 7685001  | 7687812  |
| chr17 | 7731865  | 7732657  |
| chr17 | 7962054  | 7962976  |
| chr17 | 8228770  | 8229480  |
| chr17 | 9520443  | 9521425  |
| chr17 | 10218911 | 10219738 |
| chr17 | 15489148 | 15490773 |
| chr17 | 15495568 | 15496436 |
| chr17 | 15501477 | 15503367 |
| chr17 | 16666120 | 16667214 |
| chr17 | 16689617 | 16691623 |
| chr17 | 17684543 | 17685834 |
| chr17 | 18269166 | 18271177 |
| chr17 | 18317678 | 18318627 |
| chr17 | 18320177 | 18321530 |
| chr17 | 18562327 | 18563839 |
| chr17 | 18854896 | 18855818 |
| chr17 | 18937137 | 18937905 |
| chr17 | 19002233 | 19002998 |
| chr17 | 19063174 | 19063939 |
| chr17 | 19562819 | 19563829 |
| chr17 | 19999762 | 20000494 |
| chr17 | 20000495 | 20001155 |
| chr17 | 20310713 | 20312035 |
| chr17 | 20313608 | 20314557 |
| chr17 | 20337748 | 20338663 |
| chr17 | 20361147 | 20363158 |
| chr17 | 20542126 | 20543402 |
| chr17 | 20545049 | 20545959 |
| chr17 | 21125788 | 21126691 |
| chr17 | 21128176 | 21129056 |
| chr17 | 21131202 | 21132336 |
| chr17 | 22981828 | 22982803 |
| chr17 | 25923100 | 25924408 |
| chr17 | 26403353 | 26404302 |
| chr17 | 29603570 | 29604648 |
| chr17 | 32922048 | 32923486 |
| chr17 | 35338870 | 35339610 |
| chr17 | 35693187 | 35694676 |
| chr17 | 36813488 | 36814627 |

|       |          |          |
|-------|----------|----------|
| chr17 | 36929062 | 36930119 |
| chr17 | 36930278 | 36931296 |
| chr17 | 36931297 | 36932228 |
| chr17 | 36939359 | 36940534 |
| chr17 | 36996201 | 36997385 |
| chr17 | 36997697 | 36998725 |
| chr17 | 37021946 | 37023200 |
| chr17 | 37033823 | 37036105 |
| chr17 | 37065145 | 37066090 |
| chr17 | 37193976 | 37194767 |
| chr17 | 37202455 | 37203610 |
| chr17 | 37833620 | 37834452 |
| chr17 | 38901705 | 38902900 |
| chr17 | 39192450 | 39193474 |
| chr17 | 39570920 | 39571530 |
| chr17 | 40726187 | 40727606 |
| chr17 | 40751723 | 40753230 |
| chr17 | 40753745 | 40754801 |
| chr17 | 43252811 | 43253480 |
| chr17 | 43477971 | 43478932 |
| chr17 | 44404363 | 44405523 |
| chr17 | 45482814 | 45483859 |
| chr17 | 45487335 | 45488261 |
| chr17 | 45610179 | 45611398 |
| chr17 | 46482057 | 46483034 |
| chr17 | 46553785 | 46554866 |
| chr17 | 46585543 | 46586554 |
| chr17 | 52347850 | 52348820 |
| chr17 | 53333352 | 53334355 |
| chr17 | 55051347 | 55052316 |
| chr17 | 58235440 | 58236507 |
| chr17 | 60087215 | 60088498 |
| chr17 | 60088755 | 60089442 |
| chr17 | 62672811 | 62674147 |
| chr17 | 63609622 | 63610479 |
| chr17 | 64071816 | 64073353 |
| chr17 | 64833823 | 64834808 |
| chr17 | 71487262 | 71487982 |
| chr17 | 72787521 | 72788716 |
| chr17 | 72793100 | 72794988 |

|       |          |          |
|-------|----------|----------|
| chr17 | 72795751 | 72797007 |
| chr17 | 75842769 | 75843569 |
| chr17 | 76193877 | 76194664 |
| chr17 | 76917494 | 76918540 |
| chr17 | 78440411 | 78441508 |
| chr18 | 93845    | 94951    |
| chr18 | 3438716  | 3440178  |
| chr18 | 3443655  | 3444629  |
| chr18 | 3583116  | 3584418  |
| chr18 | 3585084  | 3586374  |
| chr18 | 3592400  | 3594192  |
| chr18 | 3594345  | 3594991  |
| chr18 | 9006704  | 9008193  |
| chr18 | 11618161 | 11619143 |
| chr18 | 11628752 | 11629830 |
| chr18 | 11630324 | 11631768 |
| chr18 | 12298456 | 12299329 |
| chr18 | 19286441 | 19288504 |
| chr18 | 19420518 | 19421402 |
| chr18 | 20104616 | 20105416 |
| chr18 | 22383128 | 22383826 |
| chr18 | 26935995 | 26938084 |
| chr18 | 27209996 | 27211013 |
| chr18 | 27281227 | 27282162 |
| chr18 | 27344500 | 27345402 |
| chr18 | 30872617 | 30874152 |
| chr18 | 31335740 | 31336673 |
| chr18 | 40514317 | 40515199 |
| chr18 | 44732416 | 44733633 |
| chr18 | 44735266 | 44736873 |
| chr18 | 44737206 | 44738065 |
| chr18 | 45877716 | 45878572 |
| chr18 | 50646534 | 50647155 |
| chr18 | 51407582 | 51408553 |
| chr18 | 53863703 | 53864581 |
| chr18 | 54486835 | 54489229 |
| chr18 | 57709262 | 57710276 |
| chr18 | 59245222 | 59246341 |
| chr18 | 59289949 | 59291375 |
| chr18 | 59294317 | 59295930 |

|       |          |          |
|-------|----------|----------|
| chr18 | 59459138 | 59460192 |
| chr18 | 59476841 | 59477831 |
| chr18 | 59592806 | 59594395 |
| chr18 | 59699569 | 59701875 |
| chr18 | 59787784 | 59789293 |
| chr18 | 66023376 | 66024108 |
| chr19 | 21619    | 22350    |
| chr19 | 195064   | 196330   |
| chr19 | 703263   | 704630   |
| chr19 | 967454   | 968518   |
| chr19 | 1216373  | 1217499  |
| chr19 | 3508609  | 3509675  |
| chr19 | 4862532  | 4863650  |
| chr19 | 5237765  | 5238844  |
| chr19 | 5526467  | 5527311  |
| chr19 | 6716745  | 6718215  |
| chr19 | 7361679  | 7362862  |
| chr19 | 8326120  | 8327327  |
| chr19 | 8332534  | 8333429  |
| chr19 | 12755303 | 12757287 |
| chr19 | 12757856 | 12758658 |
| chr19 | 12760972 | 12761448 |
| chr19 | 12761845 | 12762936 |
| chr19 | 14448080 | 14448958 |
| chr19 | 14497353 | 14498188 |
| chr19 | 17308196 | 17309206 |
| chr19 | 18649496 | 18650585 |
| chr19 | 41319180 | 41320251 |
| chr19 | 44013391 | 44014505 |
| chr19 | 44019494 | 44021649 |
| chr19 | 45640949 | 45641772 |
| chr19 | 45912772 | 45914452 |
| chr19 | 46281176 | 46281959 |
| chr19 | 46459387 | 46460431 |
| chr19 | 47907084 | 47907732 |
| chr19 | 48028484 | 48029173 |
| chr19 | 48094748 | 48095587 |
| chr19 | 48444679 | 48445406 |
| chr19 | 48948628 | 48949695 |
| chr19 | 48976896 | 48977973 |



|       |          |          |
|-------|----------|----------|
| chr19 | 48978392 | 48979311 |
| chr19 | 49936533 | 49937731 |
| chr19 | 50600025 | 50601801 |
| chr19 | 50673378 | 50674428 |
| chr19 | 51417097 | 51418087 |
| chr19 | 54070013 | 54070954 |
| chr19 | 54219682 | 54221638 |
| chr19 | 54224288 | 54226229 |
| chr19 | 54232493 | 54234654 |
| chr19 | 54236675 | 54238381 |
| chr19 | 54238382 | 54239093 |
| chr19 | 54244606 | 54246391 |
| chr19 | 54250514 | 54251630 |
| chr19 | 54255989 | 54257038 |
| chr19 | 56127196 | 56127986 |
| chr19 | 56164348 | 56165135 |
| chr19 | 59959391 | 59960409 |
| chr19 | 59974091 | 59975157 |
| chr19 | 60272224 | 60273549 |
| chr19 | 60419370 | 60420237 |
| chr19 | 63790054 | 63791174 |
| chr2  | 5496     | 6528     |
| chr2  | 9095042  | 9095805  |
| chr2  | 11623035 | 11623820 |
| chr2  | 25511255 | 25512198 |
| chr2  | 25808086 | 25808700 |
| chr2  | 27762515 | 27763913 |
| chr2  | 27900114 | 27901148 |
| chr2  | 28018795 | 28019741 |
| chr2  | 28020581 | 28021371 |
| chr2  | 28525269 | 28525954 |
| chr2  | 28678991 | 28679945 |
| chr2  | 37105620 | 37106303 |
| chr2  | 37814821 | 37815812 |
| chr2  | 40573231 | 40574231 |
| chr2  | 43596473 | 43597373 |
| chr2  | 47052664 | 47053541 |
| chr2  | 47314804 | 47316297 |
| chr2  | 48482493 | 48483475 |
| chr2  | 54695971 | 54696694 |

|      |           |           |
|------|-----------|-----------|
| chr2 | 55189157  | 55190680  |
| chr2 | 55558118  | 55559005  |
| chr2 | 61153384  | 61154315  |
| chr2 | 61155259  | 61156763  |
| chr2 | 64790960  | 64791902  |
| chr2 | 65574907  | 65575779  |
| chr2 | 69110250  | 69111065  |
| chr2 | 69917634  | 69918853  |
| chr2 | 70223606  | 70224587  |
| chr2 | 70224939  | 70226120  |
| chr2 | 70691083  | 70691946  |
| chr2 | 72286537  | 72287369  |
| chr2 | 86032139  | 86033135  |
| chr2 | 86579096  | 86580297  |
| chr2 | 87592515  | 87595726  |
| chr2 | 87596036  | 87596962  |
| chr2 | 91099946  | 91101469  |
| chr2 | 91427433  | 91428325  |
| chr2 | 91644230  | 91645111  |
| chr2 | 95980256  | 95981018  |
| chr2 | 95981808  | 95982564  |
| chr2 | 95997093  | 95997896  |
| chr2 | 96347830  | 96348796  |
| chr2 | 102076068 | 102077438 |
| chr2 | 102411170 | 102411959 |
| chr2 | 105471278 | 105472371 |
| chr2 | 105478148 | 105480145 |
| chr2 | 106540661 | 106541355 |
| chr2 | 106964254 | 106965138 |
| chr2 | 108608468 | 108609260 |
| chr2 | 109062978 | 109064320 |
| chr2 | 109909056 | 109910240 |
| chr2 | 110768510 | 110769390 |
| chr2 | 110769391 | 110770033 |
| chr2 | 111049839 | 111050719 |
| chr2 | 111050720 | 111051299 |
| chr2 | 111591356 | 111592530 |
| chr2 | 111596512 | 111597396 |
| chr2 | 111966145 | 111967043 |
| chr2 | 111967287 | 111970575 |

|      |           |           |
|------|-----------|-----------|
| chr2 | 111970576 | 111971379 |
| chr2 | 112448448 | 112449827 |
| chr2 | 112529771 | 112530785 |
| chr2 | 112955111 | 112955762 |
| chr2 | 113117807 | 113119610 |
| chr2 | 113542258 | 113544033 |
| chr2 | 113546052 | 113547242 |
| chr2 | 114097063 | 114098134 |
| chr2 | 118559050 | 118560037 |
| chr2 | 121265493 | 121266306 |
| chr2 | 127691322 | 127692655 |
| chr2 | 127699803 | 127701178 |
| chr2 | 127981888 | 127983084 |
| chr2 | 130655259 | 130656046 |
| chr2 | 133007250 | 133008495 |
| chr2 | 133262811 | 133263607 |
| chr2 | 143464525 | 143465208 |
| chr2 | 143465378 | 143466301 |
| chr2 | 152857725 | 152858390 |
| chr2 | 159838858 | 159840106 |
| chr2 | 160887080 | 160888508 |
| chr2 | 161989784 | 161990854 |
| chr2 | 162926074 | 162927287 |
| chr2 | 165521821 | 165523078 |
| chr2 | 169719947 | 169721043 |
| chr2 | 171499455 | 171500546 |
| chr2 | 176794074 | 176795163 |
| chr2 | 178082957 | 178084020 |
| chr2 | 178087426 | 178088224 |
| chr2 | 178088225 | 178088805 |
| chr2 | 179958189 | 179959133 |
| chr2 | 187280616 | 187282446 |
| chr2 | 191340143 | 191340828 |
| chr2 | 191572126 | 191572738 |
| chr2 | 198205530 | 198206444 |
| chr2 | 200990585 | 200991589 |
| chr2 | 200992193 | 200992792 |
| chr2 | 203065130 | 203065880 |
| chr2 | 203065881 | 203066595 |
| chr2 | 207853389 | 207854845 |

|       |           |           |
|-------|-----------|-----------|
| chr2  | 218976772 | 218977861 |
| chr2  | 219907721 | 219908809 |
| chr2  | 219963509 | 219965503 |
| chr2  | 219968886 | 219969705 |
| chr2  | 233075571 | 233076513 |
| chr2  | 233937725 | 233938982 |
| chr2  | 234380709 | 234381739 |
| chr2  | 237775782 | 237776943 |
| chr2  | 241092951 | 241093912 |
| chr2  | 241218933 | 241219893 |
| chr2  | 241224756 | 241225916 |
| chr20 | 252437    | 253893    |
| chr20 | 1254138   | 1255023   |
| chr20 | 1398129   | 1399146   |
| chr20 | 3164113   | 3165218   |
| chr20 | 4100133   | 4101467   |
| chr20 | 4614314   | 4615272   |
| chr20 | 6050258   | 6051592   |
| chr20 | 6051593   | 6053104   |
| chr20 | 10362631  | 10363692  |
| chr20 | 10547817  | 10548678  |
| chr20 | 10599737  | 10600605  |
| chr20 | 16456316  | 16457491  |
| chr20 | 17486853  | 17487613  |
| chr20 | 17497088  | 17498148  |
| chr20 | 17897414  | 17898241  |
| chr20 | 19812862  | 19814120  |
| chr20 | 20477107  | 20478897  |
| chr20 | 21327832  | 21328589  |
| chr20 | 22977739  | 22978461  |
| chr20 | 23278309  | 23279143  |
| chr20 | 25552340  | 25553259  |
| chr20 | 29655113  | 29657295  |
| chr20 | 29770886  | 29772062  |
| chr20 | 30038828  | 30040574  |
| chr20 | 31783515  | 31784451  |
| chr20 | 31863512  | 31864428  |
| chr20 | 33006507  | 33007546  |
| chr20 | 35356158  | 35357418  |
| chr20 | 35357419  | 35358136  |

|       |          |          |
|-------|----------|----------|
| chr20 | 35586258 | 35587375 |
| chr20 | 36230618 | 36231906 |
| chr20 | 44034107 | 44034945 |
| chr20 | 44066528 | 44067643 |
| chr20 | 45421044 | 45422054 |
| chr20 | 45852746 | 45853497 |
| chr20 | 47856355 | 47857239 |
| chr20 | 48894341 | 48895286 |
| chr20 | 49852449 | 49854086 |
| chr20 | 54634855 | 54635702 |
| chr20 | 55334605 | 55335960 |
| chr20 | 55630614 | 55631625 |
| chr20 | 55716599 | 55718110 |
| chr20 | 55718401 | 55719863 |
| chr20 | 55724468 | 55725379 |
| chr20 | 55725880 | 55726801 |
| chr20 | 56638016 | 56639387 |
| chr20 | 57019183 | 57020232 |
| chr20 | 57948654 | 57949581 |
| chr20 | 60167940 | 60168958 |
| chr20 | 61646660 | 61647947 |
| chr21 | 29593509 | 29594301 |
| chr21 | 35181914 | 35182764 |
| chr21 | 35340969 | 35342362 |
| chr21 | 36765124 | 36766162 |
| chr21 | 36771686 | 36773285 |
| chr21 | 38583269 | 38584238 |
| chr21 | 39091034 | 39092933 |
| chr21 | 39094440 | 39096001 |
| chr21 | 42061064 | 42062520 |
| chr21 | 44250477 | 44251321 |
| chr21 | 45671572 | 45672632 |
| chr22 | 16490094 | 16491370 |
| chr22 | 17159261 | 17159945 |
| chr22 | 17841029 | 17841737 |
| chr22 | 18778250 | 18779158 |
| chr22 | 18799519 | 18800824 |
| chr22 | 19182572 | 19183742 |
| chr22 | 19186263 | 19187034 |
| chr22 | 19187404 | 19189116 |

|       |          |          |
|-------|----------|----------|
| chr22 | 19456206 | 19457357 |
| chr22 | 19910382 | 19911124 |
| chr22 | 20063002 | 20064046 |
| chr22 | 20097762 | 20099055 |
| chr22 | 20119371 | 20120339 |
| chr22 | 20172197 | 20173142 |
| chr22 | 20193461 | 20194801 |
| chr22 | 20228556 | 20229458 |
| chr22 | 21848935 | 21850125 |
| chr22 | 28562798 | 28563861 |
| chr22 | 28973093 | 28973990 |
| chr22 | 29136901 | 29137546 |
| chr22 | 29140772 | 29141833 |
| chr22 | 29142904 | 29144525 |
| chr22 | 29963561 | 29965466 |
| chr22 | 30010828 | 30011730 |
| chr22 | 30382830 | 30383576 |
| chr22 | 34349881 | 34351033 |
| chr22 | 35106207 | 35107471 |
| chr22 | 35116312 | 35117249 |
| chr22 | 36245646 | 36246534 |
| chr22 | 36246535 | 36247475 |
| chr22 | 36625404 | 36626394 |
| chr22 | 36900036 | 36901097 |
| chr22 | 37701238 | 37702240 |
| chr22 | 38039887 | 38040946 |
| chr22 | 40008760 | 40009642 |
| chr22 | 41582276 | 41583130 |
| chr22 | 43962545 | 43963494 |
| chr22 | 44770749 | 44771621 |
| chr22 | 44771622 | 44772316 |
| chr22 | 44772425 | 44773523 |
| chr22 | 44785831 | 44786525 |
| chr22 | 45458941 | 45460059 |
| chr22 | 48807646 | 48809088 |
| chr22 | 48823577 | 48824532 |
| chr22 | 49515130 | 49516286 |
| chr3  | 8674866  | 8675786  |
| chr3  | 9900789  | 9901764  |
| chr3  | 25440210 | 25440858 |

|      |           |           |
|------|-----------|-----------|
| chr3 | 25440859  | 25441719  |
| chr3 | 29299106  | 29299720  |
| chr3 | 39167312  | 39168139  |
| chr3 | 39168302  | 39169763  |
| chr3 | 44982720  | 44983695  |
| chr3 | 45240148  | 45241101  |
| chr3 | 48607444  | 48608901  |
| chr3 | 48610403  | 48612016  |
| chr3 | 57069287  | 57070028  |
| chr3 | 65971356  | 65972078  |
| chr3 | 69893668  | 69894772  |
| chr3 | 75565938  | 75566796  |
| chr3 | 75566848  | 75567851  |
| chr3 | 102887782 | 102888765 |
| chr3 | 102888766 | 102889328 |
| chr3 | 106567516 | 106568242 |
| chr3 | 106569062 | 106570044 |
| chr3 | 112795227 | 112796499 |
| chr3 | 112875465 | 112876844 |
| chr3 | 112877146 | 112878907 |
| chr3 | 113060102 | 113061147 |
| chr3 | 113061309 | 113062502 |
| chr3 | 113287563 | 113288513 |
| chr3 | 120382881 | 120384173 |
| chr3 | 120384174 | 120384611 |
| chr3 | 120386019 | 120387081 |
| chr3 | 123715169 | 123716148 |
| chr3 | 123811484 | 123812387 |
| chr3 | 123995260 | 123996619 |
| chr3 | 125035858 | 125036901 |
| chr3 | 126311291 | 126313495 |
| chr3 | 127117364 | 127118232 |
| chr3 | 127118420 | 127119129 |
| chr3 | 130080353 | 130081146 |
| chr3 | 130641012 | 130642083 |
| chr3 | 131311697 | 131312736 |
| chr3 | 133518689 | 133519725 |
| chr3 | 134769492 | 134771056 |
| chr3 | 134771300 | 134772195 |
| chr3 | 135558989 | 135559958 |

|      |           |           |
|------|-----------|-----------|
| chr3 | 135576115 | 135577033 |
| chr3 | 142686975 | 142688327 |
| chr3 | 143076898 | 143077828 |
| chr3 | 144097546 | 144098436 |
| chr3 | 144202382 | 144203543 |
| chr3 | 147360423 | 147361448 |
| chr3 | 150540075 | 150540867 |
| chr3 | 150577921 | 150578752 |
| chr3 | 150858035 | 150859119 |
| chr3 | 151608374 | 151609106 |
| chr3 | 151963895 | 151964689 |
| chr3 | 152516743 | 152517649 |
| chr3 | 152518902 | 152520164 |
| chr3 | 153469353 | 153470056 |
| chr3 | 154359180 | 154360066 |
| chr3 | 154360489 | 154362835 |
| chr3 | 157873929 | 157875028 |
| chr3 | 158011295 | 158013975 |
| chr3 | 158017130 | 158018665 |
| chr3 | 158026244 | 158026965 |
| chr3 | 158026966 | 158027855 |
| chr3 | 161766158 | 161767321 |
| chr3 | 161877121 | 161878095 |
| chr3 | 169295330 | 169296197 |
| chr3 | 169296412 | 169297415 |
| chr3 | 171556296 | 171557520 |
| chr3 | 171557593 | 171558749 |
| chr3 | 171558750 | 171559847 |
| chr3 | 173009682 | 173010447 |
| chr3 | 173011289 | 173012729 |
| chr3 | 173045301 | 173045912 |
| chr3 | 173911255 | 173912046 |
| chr3 | 178398443 | 178399119 |
| chr3 | 183809923 | 183810674 |
| chr3 | 184465948 | 184467258 |
| chr3 | 186758780 | 186759897 |
| chr3 | 187141248 | 187142063 |
| chr3 | 187983294 | 187984370 |
| chr3 | 195336021 | 195337111 |
| chr3 | 197204193 | 197205000 |



|      |           |           |
|------|-----------|-----------|
| chr3 | 197351138 | 197351923 |
| chr3 | 197357169 | 197358883 |
| chr3 | 197553263 | 197554109 |
| chr3 | 197557900 | 197558776 |
| chr3 | 197717535 | 197718844 |
| chr3 | 198246306 | 198248063 |
| chr3 | 198841742 | 198842620 |
| chr3 | 199389881 | 199391149 |
| chr4 | 15885     | 16935     |
| chr4 | 1160753   | 1161578   |
| chr4 | 3424493   | 3425597   |
| chr4 | 4074250   | 4075001   |
| chr4 | 4075108   | 4075866   |
| chr4 | 6787990   | 6788817   |
| chr4 | 6808423   | 6809479   |
| chr4 | 25996646  | 25997688  |
| chr4 | 38490990  | 38491865  |
| chr4 | 40472640  | 40473469  |
| chr4 | 41381631  | 41382836  |
| chr4 | 49344109  | 49344962  |
| chr4 | 68579916  | 68581414  |
| chr4 | 69532386  | 69533317  |
| chr4 | 71562139  | 71563022  |
| chr4 | 75063091  | 75063943  |
| chr4 | 79830460  | 79831354  |
| chr4 | 81348096  | 81349127  |
| chr4 | 81355512  | 81356528  |
| chr4 | 84562076  | 84563000  |
| chr4 | 85969067  | 85970531  |
| chr4 | 88169632  | 88170571  |
| chr4 | 100207909 | 100209350 |
| chr4 | 101093585 | 101094525 |
| chr4 | 102627652 | 102628620 |
| chr4 | 103780371 | 103780945 |
| chr4 | 122969094 | 122970259 |
| chr4 | 140293144 | 140294296 |
| chr4 | 143758976 | 143759624 |
| chr4 | 146786204 | 146786881 |
| chr4 | 153959259 | 153960390 |
| chr4 | 154431249 | 154432331 |

|      |           |           |
|------|-----------|-----------|
| chr4 | 170565586 | 170566236 |
| chr4 | 177566577 | 177567767 |
| chr4 | 188022277 | 188023197 |
| chr4 | 188024912 | 188025959 |
| chr4 | 191392615 | 191393503 |
| chr5 | 1937138   | 1937893   |
| chr5 | 2810724   | 2811793   |
| chr5 | 13997334  | 13998671  |
| chr5 | 16988174  | 16988822  |
| chr5 | 21372070  | 21373285  |
| chr5 | 21375726  | 21376586  |
| chr5 | 34281708  | 34282531  |
| chr5 | 34284715  | 34285942  |
| chr5 | 34951129  | 34952024  |
| chr5 | 36642114  | 36643135  |
| chr5 | 38637121  | 38638578  |
| chr5 | 43075897  | 43076631  |
| chr5 | 43078254  | 43079245  |
| chr5 | 43100695  | 43101720  |
| chr5 | 49997026  | 49998024  |
| chr5 | 49999227  | 50000556  |
| chr5 | 50012760  | 50013370  |
| chr5 | 52314983  | 52316180  |
| chr5 | 52316484  | 52317632  |
| chr5 | 52318677  | 52320726  |
| chr5 | 52810567  | 52811851  |
| chr5 | 55454796  | 55456150  |
| chr5 | 56813730  | 56814972  |
| chr5 | 58695229  | 58696230  |
| chr5 | 64529631  | 64530306  |
| chr5 | 64530307  | 64531282  |
| chr5 | 66335759  | 66336677  |
| chr5 | 68891624  | 68892346  |
| chr5 | 69043247  | 69044113  |
| chr5 | 69046244  | 69047541  |
| chr5 | 69170858  | 69172267  |
| chr5 | 69174286  | 69175157  |
| chr5 | 69622979  | 69623812  |
| chr5 | 69625922  | 69627265  |
| chr5 | 69727585  | 69728994  |

|      |           |           |
|------|-----------|-----------|
| chr5 | 69731044  | 69731884  |
| chr5 | 69921399  | 69922808  |
| chr5 | 70045982  | 70047279  |
| chr5 | 70049408  | 70050270  |
| chr5 | 70622485  | 70623326  |
| chr5 | 70625459  | 70626783  |
| chr5 | 71510804  | 71511523  |
| chr5 | 71565460  | 71566560  |
| chr5 | 72179450  | 72180472  |
| chr5 | 72286898  | 72287966  |
| chr5 | 73972654  | 73975640  |
| chr5 | 74323910  | 74324954  |
| chr5 | 75703868  | 75704904  |
| chr5 | 76145306  | 76146379  |
| chr5 | 76149852  | 76150680  |
| chr5 | 76361396  | 76362228  |
| chr5 | 83713293  | 83714866  |
| chr5 | 90611360  | 90613618  |
| chr5 | 95323169  | 95323917  |
| chr5 | 96063851  | 96065239  |
| chr5 | 96296020  | 96297100  |
| chr5 | 107035951 | 107036644 |
| chr5 | 110875922 | 110876819 |
| chr5 | 111775856 | 111776679 |
| chr5 | 115204911 | 115205706 |
| chr5 | 124105851 | 124107180 |
| chr5 | 135391416 | 135392359 |
| chr5 | 139002603 | 139003609 |
| chr5 | 139707655 | 139709327 |
| chr5 | 141230006 | 141231377 |
| chr5 | 141957532 | 141958472 |
| chr5 | 142045680 | 142046636 |
| chr5 | 147194540 | 147195921 |
| chr5 | 148493642 | 148494987 |
| chr5 | 148495004 | 148495898 |
| chr5 | 148978268 | 148979533 |
| chr5 | 149877314 | 149878117 |
| chr5 | 149999998 | 150000940 |
| chr5 | 150133563 | 150134586 |
| chr5 | 150932191 | 150933051 |

|      |           |           |
|------|-----------|-----------|
| chr5 | 156750004 | 156750838 |
| chr5 | 156935493 | 156936240 |
| chr5 | 159272450 | 159273281 |
| chr5 | 167647706 | 167648552 |
| chr5 | 169054898 | 169056563 |
| chr5 | 171546162 | 171547279 |
| chr5 | 172136924 | 172137819 |
| chr5 | 172137820 | 172138433 |
| chr5 | 178146013 | 178147341 |
| chr5 | 178982137 | 178982909 |
| chr5 | 180474232 | 180475371 |
| chr6 | 2933313   | 2934404   |
| chr6 | 3105173   | 3106043   |
| chr6 | 7485920   | 7487031   |
| chr6 | 10520886  | 10521604  |
| chr6 | 10548931  | 10550149  |
| chr6 | 12395700  | 12396682  |
| chr6 | 12396873  | 12399223  |
| chr6 | 16869999  | 16871665  |
| chr6 | 16873791  | 16875056  |
| chr6 | 20319345  | 20320225  |
| chr6 | 26163011  | 26163695  |
| chr6 | 26232161  | 26233152  |
| chr6 | 26305006  | 26306069  |
| chr6 | 26312498  | 26313574  |
| chr6 | 26393033  | 26393967  |
| chr6 | 27033379  | 27034215  |
| chr6 | 27036423  | 27037657  |
| chr6 | 27208197  | 27209572  |
| chr6 | 27883330  | 27884670  |
| chr6 | 27889803  | 27890802  |
| chr6 | 27899514  | 27900351  |
| chr6 | 27906520  | 27907816  |
| chr6 | 30792507  | 30794006  |
| chr6 | 30818466  | 30819252  |
| chr6 | 30823660  | 30824783  |
| chr6 | 30824784  | 30826083  |
| chr6 | 30827192  | 30828064  |
| chr6 | 32228509  | 32229375  |
| chr6 | 33046490  | 33047511  |

|      |           |           |
|------|-----------|-----------|
| chr6 | 33280732  | 33281776  |
| chr6 | 34820896  | 34821612  |
| chr6 | 36669582  | 36670337  |
| chr6 | 36755599  | 36756777  |
| chr6 | 36758044  | 36759132  |
| chr6 | 36831379  | 36832191  |
| chr6 | 36988029  | 36989207  |
| chr6 | 37081413  | 37082244  |
| chr6 | 37244815  | 37245888  |
| chr6 | 37247457  | 37248518  |
| chr6 | 41712117  | 41712976  |
| chr6 | 41712977  | 41713956  |
| chr6 | 42299970  | 42301016  |
| chr6 | 42302208  | 42303443  |
| chr6 | 43134669  | 43136020  |
| chr6 | 47119724  | 47120409  |
| chr6 | 56615282  | 56616364  |
| chr6 | 56926765  | 56927714  |
| chr6 | 64341301  | 64342174  |
| chr6 | 74461098  | 74462944  |
| chr6 | 75972055  | 75973071  |
| chr6 | 84793879  | 84794831  |
| chr6 | 86216255  | 86217118  |
| chr6 | 88466929  | 88467820  |
| chr6 | 108986526 | 108987247 |
| chr6 | 116488034 | 116489329 |
| chr6 | 116799271 | 116800260 |
| chr6 | 119509882 | 119510628 |
| chr6 | 123005040 | 123006129 |
| chr6 | 126174969 | 126176036 |
| chr6 | 128883451 | 128884585 |
| chr6 | 132313817 | 132314837 |
| chr6 | 137579665 | 137580562 |
| chr6 | 137580785 | 137581756 |
| chr6 | 138467944 | 138468625 |
| chr6 | 138469830 | 138470885 |
| chr6 | 139180235 | 139181402 |
| chr6 | 142663400 | 142664303 |
| chr6 | 144646996 | 144647997 |
| chr6 | 149109118 | 149109981 |

|      |           |           |
|------|-----------|-----------|
| chr6 | 151449000 | 151451029 |
| chr6 | 155539891 | 155541277 |
| chr6 | 157190072 | 157191069 |
| chr6 | 160647531 | 160648530 |
| chr6 | 163804208 | 163805097 |
| chr6 | 165958224 | 165959411 |
| chr6 | 167587300 | 167588522 |
| chr6 | 167703312 | 167705243 |
| chr6 | 168049438 | 168050378 |
| chr7 | 107683    | 108945    |
| chr7 | 644209    | 646446    |
| chr7 | 1271641   | 1272645   |
| chr7 | 1344745   | 1346199   |
| chr7 | 1346402   | 1347509   |
| chr7 | 1349752   | 1350557   |
| chr7 | 4496605   | 4497829   |
| chr7 | 5239894   | 5241171   |
| chr7 | 5241981   | 5243350   |
| chr7 | 5368280   | 5369383   |
| chr7 | 5375001   | 5376156   |
| chr7 | 7378678   | 7379874   |
| chr7 | 7724138   | 7725020   |
| chr7 | 12498916  | 12499836  |
| chr7 | 17112312  | 17113157  |
| chr7 | 20027727  | 20028734  |
| chr7 | 20029792  | 20030799  |
| chr7 | 22539189  | 22540279  |
| chr7 | 22543826  | 22544882  |
| chr7 | 22833610  | 22834286  |
| chr7 | 22994357  | 22995328  |
| chr7 | 23059168  | 23060094  |
| chr7 | 24710931  | 24711906  |
| chr7 | 24794051  | 24795141  |
| chr7 | 26013404  | 26014640  |
| chr7 | 26948480  | 26949473  |
| chr7 | 26963479  | 26964533  |
| chr7 | 26967549  | 26968712  |
| chr7 | 26968765  | 26969790  |
| chr7 | 26977413  | 26979147  |
| chr7 | 26981569  | 26983125  |

|      |          |          |
|------|----------|----------|
| chr7 | 26983126 | 26984252 |
| chr7 | 26984253 | 26985379 |
| chr7 | 26997372 | 26998181 |
| chr7 | 27552614 | 27553286 |
| chr7 | 27553287 | 27554119 |
| chr7 | 28221356 | 28222792 |
| chr7 | 29376639 | 29378376 |
| chr7 | 29800870 | 29801552 |
| chr7 | 29956251 | 29957242 |
| chr7 | 32704092 | 32704904 |
| chr7 | 33620558 | 33621480 |
| chr7 | 35507569 | 35508627 |
| chr7 | 36202815 | 36203818 |
| chr7 | 42044864 | 42045748 |
| chr7 | 43398777 | 43399678 |
| chr7 | 43790814 | 43791580 |
| chr7 | 43810052 | 43810892 |
| chr7 | 43831466 | 43832128 |
| chr7 | 44302575 | 44303395 |
| chr7 | 44660919 | 44661581 |
| chr7 | 44697513 | 44698402 |
| chr7 | 44792456 | 44793284 |
| chr7 | 45581512 | 45582408 |
| chr7 | 45736733 | 45738202 |
| chr7 | 47575847 | 47576817 |
| chr7 | 47894795 | 47896117 |
| chr7 | 47897450 | 47898567 |
| chr7 | 47900924 | 47902375 |
| chr7 | 47902603 | 47903384 |
| chr7 | 50372885 | 50373965 |
| chr7 | 54861999 | 54863002 |
| chr7 | 65903597 | 65904565 |
| chr7 | 71920443 | 71921419 |
| chr7 | 72681051 | 72682472 |
| chr7 | 72689449 | 72690529 |
| chr7 | 72937773 | 72938801 |
| chr7 | 73750742 | 73751823 |
| chr7 | 74632651 | 74633696 |
| chr7 | 74870501 | 74871328 |
| chr7 | 75571098 | 75571983 |

|      |           |           |
|------|-----------|-----------|
| chr7 | 79917502  | 79918553  |
| chr7 | 84433784  | 84434817  |
| chr7 | 86425666  | 86426771  |
| chr7 | 87500468  | 87501506  |
| chr7 | 92389351  | 92390541  |
| chr7 | 93164542  | 93165412  |
| chr7 | 97672915  | 97673972  |
| chr7 | 98384180  | 98385128  |
| chr7 | 98509466  | 98510697  |
| chr7 | 98515922  | 98516961  |
| chr7 | 98860671  | 98861720  |
| chr7 | 99583307  | 99584100  |
| chr7 | 100321403 | 100322319 |
| chr7 | 100361125 | 100362150 |
| chr7 | 100362516 | 100364206 |
| chr7 | 100867276 | 100868114 |
| chr7 | 101864928 | 101865694 |
| chr7 | 101905516 | 101906178 |
| chr7 | 102578976 | 102579769 |
| chr7 | 111682880 | 111684016 |
| chr7 | 115444943 | 115446147 |
| chr7 | 115451704 | 115452879 |
| chr7 | 115758777 | 115759216 |
| chr7 | 115905463 | 115907326 |
| chr7 | 116010531 | 116011263 |
| chr7 | 116187194 | 116187954 |
| chr7 | 129192206 | 129193284 |
| chr7 | 129526388 | 129527255 |
| chr7 | 129607309 | 129608105 |
| chr7 | 133921417 | 133922394 |
| chr7 | 138923947 | 138924978 |
| chr7 | 142629334 | 142630445 |
| chr7 | 143421771 | 143422473 |
| chr7 | 143496604 | 143497287 |
| chr7 | 148368243 | 148369245 |
| chr7 | 150248146 | 150249009 |
| chr8 | 5357      | 6258      |
| chr8 | 143828    | 145046    |
| chr8 | 1721590   | 1722578   |
| chr8 | 8123775   | 8124499   |



|      |           |           |
|------|-----------|-----------|
| chr8 | 10548847  | 10550127  |
| chr8 | 12087673  | 12088898  |
| chr8 | 12338135  | 12339143  |
| chr8 | 17707377  | 17708233  |
| chr8 | 19214633  | 19215548  |
| chr8 | 22022843  | 22023669  |
| chr8 | 22510550  | 22511615  |
| chr8 | 22900103  | 22900968  |
| chr8 | 22987557  | 22988778  |
| chr8 | 23258748  | 23259434  |
| chr8 | 25092545  | 25093817  |
| chr8 | 27530361  | 27531312  |
| chr8 | 30059136  | 30060015  |
| chr8 | 30060016  | 30060913  |
| chr8 | 37667868  | 37668705  |
| chr8 | 42242237  | 42243125  |
| chr8 | 49665043  | 49665906  |
| chr8 | 49997919  | 49999459  |
| chr8 | 55096382  | 55097273  |
| chr8 | 57395363  | 57396358  |
| chr8 | 57397745  | 57398541  |
| chr8 | 71686560  | 71687604  |
| chr8 | 81158257  | 81159309  |
| chr8 | 81159310  | 81160563  |
| chr8 | 82066374  | 82067294  |
| chr8 | 82073490  | 82074805  |
| chr8 | 102031304 | 102032483 |
| chr8 | 103734712 | 103735873 |
| chr8 | 103888313 | 103889636 |
| chr8 | 119193891 | 119194683 |
| chr8 | 120286526 | 120287175 |
| chr8 | 120288090 | 120289637 |
| chr8 | 124259814 | 124260703 |
| chr8 | 124477993 | 124478503 |
| chr8 | 124618910 | 124620202 |
| chr8 | 128816150 | 128817035 |
| chr8 | 134378578 | 134379805 |
| chr8 | 142080917 | 142082141 |
| chr8 | 143754183 | 143755286 |
| chr8 | 144726842 | 144727671 |

|      |           |           |
|------|-----------|-----------|
| chr8 | 145085427 | 145086901 |
| chr8 | 145276068 | 145276718 |
| chr8 | 145420096 | 145420746 |
| chr8 | 145618673 | 145620427 |
| chr9 | 696912    | 697865    |
| chr9 | 697866    | 698668    |
| chr9 | 5828966   | 5830099   |
| chr9 | 21678291  | 21679171  |
| chr9 | 27509058  | 27510848  |
| chr9 | 33223595  | 33224463  |
| chr9 | 33280487  | 33281681  |
| chr9 | 33803970  | 33804718  |
| chr9 | 35721315  | 35722227  |
| chr9 | 39277354  | 39278286  |
| chr9 | 39588643  | 39589573  |
| chr9 | 40318313  | 40319248  |
| chr9 | 40361859  | 40362790  |
| chr9 | 40953898  | 40954721  |
| chr9 | 41349652  | 41350475  |
| chr9 | 43092209  | 43093140  |
| chr9 | 43136944  | 43137942  |
| chr9 | 45796219  | 45799050  |
| chr9 | 65595727  | 65599246  |
| chr9 | 65811520  | 65815259  |
| chr9 | 67556255  | 67556902  |
| chr9 | 67556903  | 67559701  |
| chr9 | 67679834  | 67681122  |
| chr9 | 67997985  | 67999080  |
| chr9 | 68086056  | 68087010  |
| chr9 | 69017484  | 69018277  |
| chr9 | 69018449  | 69020679  |
| chr9 | 69980715  | 69981842  |
| chr9 | 70264075  | 70264922  |
| chr9 | 71610562  | 71611570  |
| chr9 | 71613496  | 71614882  |
| chr9 | 74871633  | 74872706  |
| chr9 | 81534075  | 81535348  |
| chr9 | 82904869  | 82906188  |
| chr9 | 82906239  | 82907103  |
| chr9 | 83551911  | 83553145  |

|      |           |           |
|------|-----------|-----------|
| chr9 | 83823570  | 83824588  |
| chr9 | 85587489  | 85588577  |
| chr9 | 88232040  | 88233003  |
| chr9 | 88233237  | 88234303  |
| chr9 | 89449592  | 89452183  |
| chr9 | 90643529  | 90644261  |
| chr9 | 91264476  | 91265539  |
| chr9 | 91941995  | 91942867  |
| chr9 | 92521527  | 92522561  |
| chr9 | 92522562  | 92523242  |
| chr9 | 92612156  | 92613073  |
| chr9 | 92815732  | 92816632  |
| chr9 | 94215880  | 94216684  |
| chr9 | 94216734  | 94217635  |
| chr9 | 96259882  | 96260755  |
| chr9 | 96260756  | 96261510  |
| chr9 | 96262001  | 96262936  |
| chr9 | 96854174  | 96855230  |
| chr9 | 96887639  | 96888882  |
| chr9 | 96903834  | 96905151  |
| chr9 | 98097327  | 98098243  |
| chr9 | 98623323  | 98624306  |
| chr9 | 100268069 | 100269127 |
| chr9 | 100269827 | 100270625 |
| chr9 | 100270626 | 100271775 |
| chr9 | 100417430 | 100418377 |
| chr9 | 103935458 | 103936633 |
| chr9 | 106701820 | 106702812 |
| chr9 | 106762390 | 106763994 |
| chr9 | 107116382 | 107117453 |
| chr9 | 107880880 | 107881932 |
| chr9 | 107881955 | 107884188 |
| chr9 | 108676823 | 108677816 |
| chr9 | 108853938 | 108854859 |
| chr9 | 109339060 | 109339901 |
| chr9 | 109481583 | 109482549 |
| chr9 | 110096666 | 110097840 |
| chr9 | 110811600 | 110812471 |
| chr9 | 110818803 | 110819738 |
| chr9 | 111472396 | 111473572 |

|      |           |           |
|------|-----------|-----------|
| chr9 | 112015956 | 112016964 |
| chr9 | 112175991 | 112176603 |
| chr9 | 112220993 | 112221780 |
| chr9 | 113420328 | 113421685 |
| chr9 | 114645679 | 114647224 |
| chr9 | 114958039 | 114959113 |
| chr9 | 114960304 | 114961301 |
| chr9 | 114968582 | 114969567 |
| chr9 | 116534578 | 116535994 |
| chr9 | 120718044 | 120718909 |
| chr9 | 121127841 | 121129110 |
| chr9 | 121176717 | 121177671 |
| chr9 | 121214466 | 121215844 |
| chr9 | 121541905 | 121542999 |
| chr9 | 122782919 | 122784016 |
| chr9 | 124620820 | 124621675 |
| chr9 | 125084794 | 125085473 |
| chr9 | 127415952 | 127416963 |
| chr9 | 127420480 | 127421490 |
| chr9 | 127760789 | 127761747 |
| chr9 | 127796971 | 127798023 |
| chr9 | 127810054 | 127811042 |
| chr9 | 127811194 | 127812088 |
| chr9 | 128164972 | 128165582 |
| chr9 | 128743796 | 128745098 |
| chr9 | 129175241 | 129176750 |
| chr9 | 129593413 | 129594725 |
| chr9 | 129676437 | 129677151 |
| chr9 | 130331535 | 130332498 |
| chr9 | 130739046 | 130740192 |
| chr9 | 131618825 | 131619908 |
| chr9 | 132935278 | 132936321 |
| chr9 | 136652239 | 136652962 |
| chr9 | 136863756 | 136864624 |
| chr9 | 137253410 | 137254489 |
| chr9 | 137734994 | 137735996 |
| chr9 | 137738421 | 137739340 |
| chr9 | 137781932 | 137783269 |
| chr9 | 138403870 | 138405124 |
| chrX | 12752035  | 12753415  |

|      |           |           |
|------|-----------|-----------|
| chrX | 15441956  | 15442711  |
| chrX | 15631403  | 15632240  |
| chrX | 17154582  | 17155899  |
| chrX | 23559130  | 23559774  |
| chrX | 23678548  | 23679687  |
| chrX | 47130044  | 47131026  |
| chrX | 48784515  | 48785353  |
| chrX | 111429811 | 111430685 |
| chrX | 114080632 | 114081311 |
| chrX | 114616843 | 114618736 |
| chrX | 119650025 | 119650900 |
| chrX | 129025297 | 129025984 |
| chrX | 148290268 | 148291310 |
| chrX | 148312460 | 148313433 |
| chrX | 153332730 | 153333616 |

**SUPPLEMENTAL TABLE S2.** Complete list of annotated genes ( $p < 10^{-5}$ ).

| AFFY_ID                                                         | Gene Name                                                                   |
|-----------------------------------------------------------------|-----------------------------------------------------------------------------|
| 209369_at                                                       | annexin a3                                                                  |
| 219691_at, 228531_at                                            | sterile alpha motif domain containing 9                                     |
| 210582_s_at, 202193_at                                          | lim domain kinase 2                                                         |
| 211936_at, 230031_at                                            | heat shock 70kda protein 5 (glucose-regulated protein, 78kda)               |
| 203696_s_at                                                     | replication factor c (activator 1) 2, 40kda                                 |
| 201925_s_at, 201926_s_at                                        | cd55 antigen, decay accelerating factor for complement (cromer blood group) |
| 204532_x_at, 208596_s_at, 215125_s_at, 207126_x_at              | udp glucuronosyltransferase 1 family, polypeptide a9                        |
| 203779_s_at, 230518_at, 203780_at                               | epithelial v-like antigen 1                                                 |
| 1555310_a_at, 219461_at                                         | p21(cdkn1a)-activated kinase 6                                              |
| 203192_at                                                       | atp-binding cassette, sub-family b (mdr/tap), member 6                      |
| 217792_at, 222417_s_at, 229981_at, 229980_s_at                  | sorting nexin 5                                                             |
| 202468_s_at                                                     | catenin (cadherin-associated protein), alpha-like 1                         |
| 226405_s_at                                                     | arrestin domain containing 1                                                |
| 224631_at, 224636_at                                            | zinc finger protein 91 homolog (mouse)                                      |
| 223538_at, 223539_s_at                                          | small edrk-rich factor 1a (telomeric)                                       |
| 200001_at                                                       | calpain, small subunit 1                                                    |
| 226233_at                                                       | udp-galnac:betaglcnac beta 1,3-galactosaminyltransferase, polypeptide 2     |
| 204000_at, 207124_s_at, 211871_x_at                             | guanine nucleotide binding protein (g protein), beta 5                      |
| 1558027_s_at, 225278_at                                         | protein kinase, amp-activated, beta 2 non-catalytic subunit                 |
| 230643_at                                                       | wingless-type mmtv integration site family, member 9a                       |
| 219697_at                                                       | heparan sulfate (glucosamine) 3-o-sulfotransferase 2                        |
| 226753_at, 232048_at                                            | family with sequence similarity 76, member b                                |
| 214290_s_at, 218280_x_at                                        | histone 2, h2aa                                                             |
| 213342_at, 224895_at, 224894_at                                 | yes-associated protein 1, 65kda                                             |
| 204532_x_at, 207126_x_at, 208596_s_at, 215125_s_at, 206094_x_at | udp glucuronosyltransferase 1 family, polypeptide a6                        |
| 226738_at                                                       | wd repeat domain 81                                                         |
| 206858_s_at                                                     | homeobox c6                                                                 |
| 201268_at                                                       | non-metastatic cells 2, protein (nm23b) expressed in                        |

|                                                                     |                                                                                                                                                                                                                                                                        |
|---------------------------------------------------------------------|------------------------------------------------------------------------------------------------------------------------------------------------------------------------------------------------------------------------------------------------------------------------|
| 203157_s_at, 223079_s_at,<br>221510_s_at, 203159_at,<br>203158_s_at | glutaminase                                                                                                                                                                                                                                                            |
| 202679_at                                                           | niemann-pick disease, type c1                                                                                                                                                                                                                                          |
| 212509_s_at                                                         | flj46603 protein                                                                                                                                                                                                                                                       |
| 223259_at                                                           | hypothetical protein loc51242                                                                                                                                                                                                                                          |
| 225135_at                                                           | sin3 homolog a, transcription regulator (yeast)                                                                                                                                                                                                                        |
| 223367_at                                                           | williams beuren syndrome chromosome region 18                                                                                                                                                                                                                          |
| 229615_at                                                           | ,consensus includes gb:av722510 /fea=est /db_xref=gi:10825071 /db_xref=est:av722510 /clone=htbagb11 /ug=hs.5461 ests,gb:av722510 /db_xref=gi:10825071 /db_xref=av722510 /clone=htbagb11 /fea=est /cnt=18 /tid=hs.5461.0 /tier=stack /stk=12 /ug=hs.5461 /ug_title=ests |
| 212995_x_at                                                         | hypothetical protein flj14346                                                                                                                                                                                                                                          |
| 218245_at                                                           | leucine rich repeat containing 54                                                                                                                                                                                                                                      |
| 204532_x_at, 208596_s_at,<br>215125_s_at, 207126_x_at               | udp glucuronosyltransferase 1 family, polypeptide a5                                                                                                                                                                                                                   |
| 201921_at, 226859_at                                                | guanine nucleotide binding protein (g protein), gamma 10                                                                                                                                                                                                               |
| 219457_s_at, 60471_at                                               | ras and rab interactor 3                                                                                                                                                                                                                                               |
| 208962_s_at, 208963_x_at,<br>208964_s_at                            | fatty acid desaturase 1                                                                                                                                                                                                                                                |
| 223058_at, 223059_s_at                                              | family with sequence similarity 107, member b                                                                                                                                                                                                                          |
| 202469_s_at                                                         | cleavage and polyadenylation specific factor 6, 68kda                                                                                                                                                                                                                  |
| 205823_at, 209637_s_at                                              | regulator of g-protein signalling 12                                                                                                                                                                                                                                   |
| 201886_at, 216389_s_at                                              | wd repeat domain 23                                                                                                                                                                                                                                                    |
| 212245_at, 212246_at                                                | multiple coagulation factor deficiency 2                                                                                                                                                                                                                               |
| 225789_at, 231299_at,<br>239026_x_at                                | centaurin, gamma 3                                                                                                                                                                                                                                                     |
| 203725_at                                                           | growth arrest and dna-damage-inducible, alpha                                                                                                                                                                                                                          |
| 219013_at                                                           | udp-n-acetyl-alpha-d-galactosamine:polypeptide<br>n-acetylgalactosaminyltransferase 11 (galnac-t11)                                                                                                                                                                    |
| 217848_s_at                                                         | pyrophosphatase (inorganic) 1                                                                                                                                                                                                                                          |
| 201688_s_at, 201689_s_at,<br>201690_s_at                            | tumor protein d52                                                                                                                                                                                                                                                      |
| 205512_s_at                                                         | programmed cell death 8 (apoptosis-inducing factor)                                                                                                                                                                                                                    |
| 238689_at                                                           | hypothetical protein flj22684                                                                                                                                                                                                                                          |
| 212909_at, 229105_at                                                | ly6/plaur domain containing 1                                                                                                                                                                                                                                          |
| 212895_s_at                                                         | active bcr-related gene                                                                                                                                                                                                                                                |
| 214580_x_at                                                         | keratin 6a                                                                                                                                                                                                                                                             |
| 202458_at, 229441_at,<br>226279_at                                  | protease, serine, 23                                                                                                                                                                                                                                                   |

|                                                       |                                                                                             |
|-------------------------------------------------------|---------------------------------------------------------------------------------------------|
| 206860_s_at, 211724_x_at                              | hypothetical protein flj20323                                                               |
| 204812_at                                             | zw10, kinetochore associated, homolog (drosophila)                                          |
| 208636_at, 211160_x_at,<br>208637_x_at                | actinin, alpha 1                                                                            |
| 201351_s_at, 201352_at                                | yme1-like 1 (s. cerevisiae)                                                                 |
| 222633_at, 223013_at,<br>222634_s_at                  | transducin (beta)-like 1x-linked receptor 1                                                 |
| 203300_x_at, 230264_s_at,<br>228415_at                | adaptor-related protein complex 1, sigma 2 subunit                                          |
| 205015_s_at, 205016_at,<br>211258_s_at                | transforming growth factor, alpha                                                           |
| 212989_at                                             | transmembrane protein 23                                                                    |
| 209600_s_at, 227962_at,<br>213501_at                  | acyl-coenzyme a oxidase 1, palmitoyl                                                        |
| 220240_s_at                                           | transmembrane and coiled-coil domains 3                                                     |
| 223109_at                                             | trub pseudouridine (psi) synthase homolog 2 (e. coli)                                       |
| 222675_s_at, 227371_at,<br>227372_s_at                | bai1-associated protein 2-like 1                                                            |
| 1556773_at, 206300_s_at,<br>210355_at, 211756_at      | parathyroid hormone-like hormone                                                            |
| 200097_s_at, 200775_s_at                              | heterogeneous nuclear ribonucleoprotein k                                                   |
| 209684_at                                             | ras and rab interactor 2                                                                    |
| 228545_at                                             | zinc finger protein 148 (phz-52)                                                            |
| 1552295_a_at, 225277_at                               | solute carrier family 39 (zinc transporter), member 13                                      |
| 204532_x_at, 207126_x_at,<br>208596_s_at, 215125_s_at | udp glucuronosyltransferase 1 family, polypeptide a1                                        |
| 204194_at                                             | btb and cnc homology 1, basic leucine zipper transcription factor 1                         |
| 224992_s_at, 224991_at                                | c-maf-inducing protein                                                                      |
| 228324_at                                             | chromosome 9 open reading frame 41                                                          |
| 208868_s_at, 208869_s_at                              | gaba(a) receptor-associated protein like 1                                                  |
| 204420_at                                             | fos-like antigen 1                                                                          |
| 207156_at                                             | histone 1, h2ai                                                                             |
| 202759_s_at, 202760_s_at,<br>226694_at                | a kinase (prka) anchor protein 2                                                            |
| 212374_at                                             | fem-1 homolog b (c. elegans)                                                                |
| 218116_at                                             | hypothetical protein hspc220                                                                |
| 202425_x_at, 202457_s_at,<br>202429_s_at, 236545_at   | protein phosphatase 3 (formerly 2b), catalytic subunit, alpha isoform (calcineurin a alpha) |
| 203108_at                                             | g protein-coupled receptor, family c, group 5, member a                                     |
| 203316_s_at, 215450_at                                | small nuclear ribonucleoprotein polypeptide e                                               |



|                                                                 |                                                                                     |
|-----------------------------------------------------------------|-------------------------------------------------------------------------------------|
| 207388_s_at, 210367_s_at                                        | prostaglandin e synthase                                                            |
| 1557432_at, 219026_s_at,<br>222810_s_at, 234343_s_at            | ras protein activator like 2                                                        |
| 211012_s_at, 211014_s_at                                        | hypothetical protein loc161527                                                      |
| 200614_at                                                       | clathrin, heavy polypeptide (hc)                                                    |
| 201022_s_at, 201021_s_at                                        | destrin (actin depolymerizing factor)                                               |
| 229804_x_at                                                     | cobw domain containing 1                                                            |
| 223796_at                                                       | contactin associated protein-like 3                                                 |
| 214693_x_at, 215434_x_at,<br>229447_x_at, 226740_x_at           | neuroblastoma breakpoint family, member 14                                          |
| 201215_at                                                       | plastin 3 (t isoform)                                                               |
| 217820_s_at, 222433_at                                          | enabled homolog (drosophila)                                                        |
| 206487_at, 212074_at                                            | unc-84 homolog a (c. elegans)                                                       |
| 225119_at, 225498_at                                            | chromatin modifying protein 4b                                                      |
| 204036_at, 204037_at,<br>204038_s_at                            | endothelial differentiation, lysophosphatidic acid g-protein-coupled receptor,<br>2 |
| 236370_at, 232665_x_at,<br>215458_s_at, 212668_at,<br>212666_at | smad specific e3 ubiquitin protein ligase 1                                         |
| 236077_at                                                       | glucosidase, alpha; neutral c                                                       |
| 225020_at                                                       | ngap-like protein                                                                   |
| 202912_at                                                       | adrenomedullin                                                                      |
| 223095_at                                                       | marvel domain containing 1                                                          |
| 202154_x_at, 213476_x_at                                        | melanocortin 1 receptor (alpha melanocyte stimulating hormone receptor)             |
| 202708_s_at                                                     | histone 1, h2bb                                                                     |
| 202899_s_at, 208673_s_at,<br>232392_at, 208672_s_at             | splicing factor, arginine/serine-rich 3                                             |
| 208685_x_at, 214911_s_at,<br>208686_s_at                        | bromodomain containing 2                                                            |
| 205846_at, 230250_at                                            | protein tyrosine phosphatase, receptor type, b                                      |
| 210676_x_at                                                     | ranbp2-like and grip domain containing 8                                            |
| 221664_s_at, 223000_s_at,<br>226482_s_at, 224097_s_at           | f11 receptor                                                                        |
| 201373_at                                                       | plectin 1, intermediate filament binding protein 500kda                             |
| 219151_s_at, 220500_s_at                                        | rab, member of ras oncogene family-like 2a                                          |
| 209929_s_at, 36004_at                                           | inhibitor of kappa light polypeptide gene enhancer in b-cells, kinase gamma         |
| 221951_at, 65630_at                                             | transmembrane protein 80                                                            |
| 200847_s_at                                                     | transmembrane protein 66                                                            |
| 219850_s_at, 222932_at,<br>225645_at, 232361_s_at,              | ets homologous factor                                                               |

|                                          |                                                                                                                       |
|------------------------------------------|-----------------------------------------------------------------------------------------------------------------------|
| 224189_x_at                              |                                                                                                                       |
| 233180_at                                | ring finger protein 152                                                                                               |
| 223143_s_at, 223144_s_at,<br>223145_s_at | chromosome 6 open reading frame 166                                                                                   |
| 201912_s_at, 240452_at,<br>215438_x_at   | g1 to s phase transition 1                                                                                            |
| 228293_at                                | novel 58.3 kda protein                                                                                                |
| 206604_at, 229396_at                     | ovo-like 1(drosophila)                                                                                                |
| 204948_s_at, 207345_at,<br>226847_at     | follistatin                                                                                                           |
| 225655_at                                | ubiquitin-like, containing phd and ring finger domains, 1                                                             |
| 209765_at                                | adam metalloproteinase domain 19 (meltrin beta)                                                                       |
| 201300_s_at, 215707_s_at                 | prion protein (p27-30) (creutzfeld-jakob disease,<br>gerstmann-strausler-scheinker syndrome, fatal familial insomnia) |
| 218370_s_at, 222610_s_at                 | s100p binding protein                                                                                                 |
| 203091_at, 214093_s_at,<br>212847_at     | far upstream element (fuse) binding protein 1                                                                         |
| 209490_s_at                              | palmitoyl-protein thioesterase 2                                                                                      |
| 205550_s_at, 212645_x_at                 | brain and reproductive organ-expressed (tnfrsf1a modulator)                                                           |
| 200872_at, 238909_at                     | s100 calcium binding protein a10 (annexin ii ligand, calpactin i, light polypeptide (p11))                            |
| 216092_s_at                              | solute carrier family 7 (cationic amino acid transporter, y+ system), member 8                                        |
| 212010_s_at, 213548_s_at,<br>213554_s_at | cdv3 homolog (mouse)                                                                                                  |
| 204473_s_at                              | zinc finger protein 592                                                                                               |
| 210993_s_at, 227798_at                   | smad, mothers against dpp homolog 1 (drosophila)                                                                      |
| 200916_at, 210978_s_at                   | transgelin 2                                                                                                          |
| 205157_s_at                              | keratin 17                                                                                                            |
| 224806_at                                | tripartite motif-containing 25                                                                                        |
| 203287_at                                | ladinin 1                                                                                                             |
| 208891_at, 208893_s_at,<br>208892_s_at   | dual specificity phosphatase 6                                                                                        |
| 225557_at                                | axin1 up-regulated 1                                                                                                  |
| 200965_s_at, 210461_s_at                 | actin binding lim protein 1                                                                                           |
| 213005_s_at                              | ankyrin repeat domain 15                                                                                              |
| 232333_at, 244414_at,<br>235457_at       | mastermind-like 2 (drosophila)                                                                                        |
| 204678_s_at, 204679_at                   | potassium channel, subfamily k, member 1                                                                              |
| 222154_s_at                              | dna polymerase-transactivated protein 6                                                                               |

|                                                                              |                                                                                                                    |
|------------------------------------------------------------------------------|--------------------------------------------------------------------------------------------------------------------|
| 219922_s_at, 227308_x_at                                                     | latent transforming growth factor beta binding protein 3                                                           |
| 204734_at                                                                    | keratin 15                                                                                                         |
| 213139_at                                                                    | snail homolog 2 (drosophila)                                                                                       |
| 205220_at                                                                    | g protein-coupled receptor 109b                                                                                    |
| 214722_at, 227067_x_at                                                       | notch homolog 2 (drosophila) n-terminal like                                                                       |
| 218964_at                                                                    | at rich interactive domain 3b (bright- like)                                                                       |
| 238638_at                                                                    | solute carrier family 37 (glycerol-3-phosphate transporter), member 2                                              |
| 204028_s_at, 213313_at                                                       | rab gtpase activating protein 1                                                                                    |
| 204653_at, 204654_s_at                                                       | transcription factor ap-2 alpha (activating enhancer binding protein 2 alpha)                                      |
| 218854_at                                                                    | squamous cell carcinoma antigen recognized by t cells 2                                                            |
| 218979_at                                                                    | chromosome 9 open reading frame 76                                                                                 |
| 219179_at                                                                    | dapper, antagonist of beta-catenin, homolog 1 (xenopus laevis)                                                     |
| 219474_at                                                                    | chromosome 3 open reading frame 52                                                                                 |
| 225738_at, 226389_s_at                                                       | rap guanine nucleotide exchange factor (gef) 1                                                                     |
| 233690_at                                                                    | chromosome 21 open reading frame 96                                                                                |
| 224561_s_at, 217982_s_at                                                     | mortality factor 4 like 1                                                                                          |
| 207935_s_at                                                                  | keratin 13                                                                                                         |
| 209126_x_at, 214580_x_at                                                     | keratin 6b                                                                                                         |
| 221215_s_at                                                                  | receptor-interacting serine-threonine kinase 4                                                                     |
| 238650_x_at                                                                  | chromosome 14 open reading frame 150                                                                               |
| 201473_at                                                                    | jun b proto-oncogene                                                                                               |
| 226046_at, 226048_at                                                         | mitogen-activated protein kinase 8                                                                                 |
| 200730_s_at, 200731_s_at,<br>200733_s_at                                     | protein tyrosine phosphatase type iva, member 1                                                                    |
| 220468_at                                                                    | adp-ribosylation factor-like 14                                                                                    |
| 215504_x_at, 223251_s_at,<br>218093_s_at, 226663_at,<br>235008_at, 227260_at | ankyrin repeat domain 10                                                                                           |
| 211255_x_at, 215158_s_at                                                     | death effector domain containing                                                                                   |
| 202443_x_at, 210756_s_at,<br>212377_s_at                                     | notch homolog 2 (drosophila)                                                                                       |
| 212185_x_at                                                                  | metallothionein 2a                                                                                                 |
| 203597_s_at, 203599_s_at,<br>203598_s_at                                     | ww domain binding protein 4 (formin binding protein 21)                                                            |
| 212925_at                                                                    | chromosome 19 open reading frame 21                                                                                |
| 201067_at, 201068_s_at                                                       | proteasome (prosome, macropain) 26s subunit, atpase, 2                                                             |
| 221551_x_at, 223285_s_at                                                     | st6<br>(alpha-n-acetyl-neuraminy-2,3-beta-galactosyl-1,3)-n-acetylgalactosaminide<br>alpha-2,6-sialyltransferase 4 |
| 237411_at                                                                    | adam metalloproteinase with thrombospondin type 1 motif, 6                                                         |

|                                                                                              |                                                                                                    |
|----------------------------------------------------------------------------------------------|----------------------------------------------------------------------------------------------------|
| 1553995_a_at, 203939_at                                                                      | 5'-nucleotidase, ecto (cd73)                                                                       |
| 226380_at                                                                                    | protein tyrosine phosphatase, non-receptor type 21                                                 |
| 201983_s_at, 201984_s_at,<br>211607_x_at, 210984_x_at,<br>224999_at, 233044_at,<br>232541_at | epidermal growth factor receptor (erythroblastic leukemia viral (v-erb-b) oncogene homolog, avian) |
| 203061_s_at, 203062_s_at                                                                     | mediator of dna damage checkpoint 1                                                                |
| 226832_at                                                                                    | hypothetical loc389188                                                                             |
| 219290_x_at, 222859_s_at,<br>222858_s_at                                                     | dual adaptor of phosphotyrosine and 3-phosphoinositides                                            |
| 226733_at                                                                                    | 6-phosphofructo-2-kinase/fructose-2,6-biphosphatase 2                                              |
| 204662_at                                                                                    | cp110 protein                                                                                      |
| 223460_at                                                                                    | calcium/calmodulin-dependent protein kinase kinase 1, alpha                                        |
| 208680_at                                                                                    | peroxiredoxin 1                                                                                    |
| 232116_at                                                                                    | grainyhead-like 3 (drosophila)                                                                     |
| 1554018_at, 201141_at                                                                        | glycoprotein (transmembrane) nmb                                                                   |
| 222173_s_at                                                                                  | tbc1 domain family, member 2                                                                       |
| 208949_s_at                                                                                  | galectin-3 internal gene                                                                           |
| 220353_at                                                                                    | hypothetical protein flj10661                                                                      |
| 209558_s_at, 38340_at                                                                        | huntingtin interacting protein 1 related                                                           |
| 208620_at                                                                                    | poly(rc) binding protein 1                                                                         |
| 219412_at                                                                                    | rab38, member ras oncogene family                                                                  |
| 220924_s_at, 222982_x_at                                                                     | solute carrier family 38, member 2                                                                 |
| 221772_s_at, 225066_at                                                                       | protein phosphatase 2, regulatory subunit b, delta isoform                                         |
| 216241_s_at                                                                                  | transcription elongation factor a (sii), 1                                                         |
| 224619_at                                                                                    | cancer susceptibility candidate 4                                                                  |
| 228558_at                                                                                    | chromosome 14 open reading frame 80                                                                |
| 203802_x_at, 213773_x_at                                                                     | nol1/nop2/sun domain family, member 5                                                              |
| 226726_at                                                                                    | o-acyltransferase (membrane bound) domain containing 2                                             |
| 214580_x_at                                                                                  | keratin 6a                                                                                         |
| 203002_at                                                                                    | kiaa0989 protein                                                                                   |
| 224650_at                                                                                    | mal, t-cell differentiation protein 2                                                              |
| 218826_at                                                                                    | solute carrier family 35, member f2                                                                |
| 204126_s_at                                                                                  | cdc45 cell division cycle 45-like (s. cerevisiae)                                                  |
| 224817_at                                                                                    | sh3 and px domains 2a                                                                              |
| 209130_at, 209131_s_at,<br>214544_s_at, 229773_at                                            | synaptosomal-associated protein, 23kda                                                             |
| 212125_at, 1553535_a_at,<br>212127_at                                                        | ran gtpase activating protein 1                                                                    |
| 224569_s_at, 224572_s_at,                                                                    | interferon regulatory factor 2 binding protein 2                                                   |

|                                          |                                                                      |
|------------------------------------------|----------------------------------------------------------------------|
| 224571_at                                |                                                                      |
| 221540_x_at, 223758_s_at                 | general transcription factor iih, polypeptide 2, 44kda               |
| 1553105_s_at, 217901_at                  | desmoglein 2                                                         |
| 214693_x_at                              | neuroblastoma breakpoint family, member 9                            |
| 207622_s_at, 209247_s_at,<br>209246_at   | atp-binding cassette, sub-family f (gcn20), member 2                 |
| 226206_at                                | v-maf musculoaponeurotic fibrosarcoma oncogene homolog k (avian)     |
| 222669_s_at                              | shwachman-bodian-diamond syndrome                                    |
| 219105_x_at                              | origin recognition complex, subunit 6 homolog-like (yeast)           |
| 218328_at, 228931_at                     | coenzyme q4 homolog (yeast)                                          |
| 218880_at, 228188_at,<br>225262_at       | fos-like antigen 2                                                   |
| 201653_at                                | cornichon homolog (drosophila)                                       |
| 213085_s_at, 236725_at                   | ww, c2 and coiled-coil domain containing 1                           |
| 209103_s_at                              | ubiquitin fusion degradation 1 like (yeast)                          |
| 205596_s_at, 230820_at                   | smad specific e3 ubiquitin protein ligase 2                          |
| 201031_s_at, 213470_s_at,<br>213619_at   | heterogeneous nuclear ribonucleoprotein h1 (h)                       |
| 201474_s_at                              | integrin, alpha 3 (antigen cd49c, alpha 3 subunit of vla-3 receptor) |
| 219332_at                                | mical-like 2                                                         |
| 209803_s_at                              | pleckstrin homology-like domain, family a, member 2                  |
| 204003_s_at                              | nucleoporin like 2                                                   |
| 209148_at, 215099_s_at                   | retinoid x receptor, beta                                            |
| 201995_at, 232174_at,<br>242126_at       | exostoses (multiple) 1                                               |
| 225450_at, 228840_at,<br>225459_at       | likely ortholog of mouse junction-enriched and associated protein    |
| 228468_at                                | microtubule associated serine/threonine kinase-like                  |
| 201435_s_at, 201437_s_at                 | eukaryotic translation initiation factor 4e                          |
| 204614_at                                | serpin peptidase inhibitor, clade b (ovalbumin), member 2            |
| 227946_at                                | oxysterol binding protein-like 7                                     |
| 204711_at                                | kiaa0753                                                             |
| 204538_x_at                              | similar to nuclear pore complex interacting protein                  |
| 208158_s_at, 209485_s_at                 | oxysterol-binding protein-related protein 1                          |
| 1558699_a_at,<br>1552628_a_at, 222751_at | hypothetical protein flj22313                                        |
| 219265_at, 229568_at,<br>226844_at       | mob1, mps one binder kinase activator-like 2b (yeast)                |
| 209260_at                                | stratifin                                                            |
| 201428_at                                | claudin 4                                                            |

|                                                     |                                                                                                         |
|-----------------------------------------------------|---------------------------------------------------------------------------------------------------------|
| 202141_s_at, 202143_s_at,<br>202142_at              | cop9 constitutive photomorphogenic homolog subunit 8 (arabidopsis)                                      |
| 201142_at, 201144_s_at,<br>201143_s_at              | eukaryotic translation initiation factor 2, subunit 1 alpha, 35kda                                      |
| 227249_at                                           | myosin, heavy polypeptide 11, smooth muscle                                                             |
| 201266_at                                           | thioredoxin reductase 1                                                                                 |
| 221890_at                                           | zinc finger protein 335                                                                                 |
| 204455_at, 212254_s_at,<br>212253_x_at, 215016_x_at | dystonin                                                                                                |
| 208937_s_at                                         | inhibitor of dna binding 1, dominant negative helix-loop-helix protein                                  |
| 209286_at, 209287_s_at,<br>209288_s_at              | cdc42 effector protein (rho gtpase binding) 3                                                           |
| 203846_at                                           | tripartite motif-containing 32                                                                          |
| 222889_at                                           | dna cross-link repair 1b (pso2 homolog, s. cerevisiae)                                                  |
| 219361_s_at                                         | interferon stimulated exonuclease gene 20kda-like 1                                                     |
| 216242_x_at                                         | dna directed rna polymerase ii polypeptide j-related gene                                               |
| 1558678_s_at,<br>224558_s_at, 224568_x_at           | metastasis associated lung adenocarcinoma transcript 1 (non-coding rna)                                 |
| 200606_at                                           | desmoplakin                                                                                             |
| 1569030_s_at, 222512_at                             | nedd8 ultimate buster-1                                                                                 |
| 1554757_a_at, 203006_at                             | inositol polyphosphate-5-phosphatase, 40kda                                                             |
| 225582_at                                           | kiaa1754                                                                                                |
| 213147_at, 213150_at                                | homeobox a10                                                                                            |
| 202676_x_at, 210975_x_at                            | fas-activated serine/threonine kinase                                                                   |
| 208864_s_at, 216609_at                              | thioredoxin                                                                                             |
| 229804_x_at                                         | hypothetical protein from clone 1659351                                                                 |
| 205847_at                                           | protease, serine, 22                                                                                    |
| 219515_at                                           | pr domain containing 10                                                                                 |
| 209626_s_at, 209627_s_at                            | oxysterol binding protein-like 3                                                                        |
| 209453_at                                           | solute carrier family 9 (sodium/hydrogen exchanger), member 1 (antiporter, na+/h+, amiloride sensitive) |
| 201235_s_at, 201236_s_at                            | btg family, member 2                                                                                    |
| 208657_s_at, 41220_at                               | septin 9                                                                                                |
| 229582_at                                           | chromosome 18 open reading frame 37                                                                     |
| 218396_at                                           | vacuolar protein sorting 13c (yeast)                                                                    |
| 210958_s_at, 225613_at,<br>40016_g_at, 225611_at    | microtubule associated serine/threonine kinase family member 4                                          |
| 1557080_s_at,<br>205422_s_at                        | integrin, beta-like 1 (with egf-like repeat domains)                                                    |
| 204494_s_at, 204495_s_at                            | dkfzp434h132 protein                                                                                    |

|                                          |                                                                             |
|------------------------------------------|-----------------------------------------------------------------------------|
| 225890_at                                | chromosome 20 open reading frame 72                                         |
| 222013_x_at                              | amyloid beta (a4) precursor protein (peptidase nexin-ii, alzheimer disease) |
| 1554010_at, 202607_at                    | n-deacetylase/n-sulfotransferase (heparan glucosaminyl) 1                   |
| 201829_at, 201830_s_at                   | neuroepithelial cell transforming gene 1                                    |
| 218258_at                                | polymerase (rna) i polypeptide d, 16kda                                     |
| 202146_at, 202147_s_at                   | interferon-related developmental regulator 1                                |
| 205375_at                                | myod family inhibitor                                                       |
| 209407_s_at                              | deformed epidermal autoregulatory factor 1 (drosophila)                     |
| 235521_at                                | homeobox a3                                                                 |
| 223019_at, 233974_s_at                   | chromosome 9 open reading frame 88                                          |
| 201065_s_at, 210892_s_at,<br>210891_s_at | general transcription factor ii, i                                          |
| 230669_at                                | ras p21 protein activator 2                                                 |
| 230769_at                                | denn/madd domain containing 2c                                              |
| 1552487_a_at, 206581_at                  | basonuclin 1                                                                |
| 200789_at                                | enoyl coenzyme a hydratase 1, peroxisomal                                   |
| 229949_at                                | tripartite motif-containing 50a                                             |
| 218644_at                                | pleckstrin 2                                                                |
| 204206_at                                | max binding protein                                                         |
| 201650_at                                | keratin 19                                                                  |
| 212262_at, 212263_at                     | quaking homolog, kh domain rna binding (mouse)                              |
| 222457_s_at, 217892_s_at                 | lim domain and actin binding 1                                              |
| 212321_at, 212322_at                     | sphingosine-1-phosphate lyase 1                                             |
| 1554352_s_at                             | denn/madd domain containing 4a                                              |
| 204682_at, 223690_at                     | latent transforming growth factor beta binding protein 2                    |
| 224762_at                                | serine incorporator 2                                                       |
| 1556042_s_at                             | hypothetical locus loc338799                                                |
| 1568868_at                               | flj16008 protein                                                            |
| 204484_at                                | phosphoinositide-3-kinase, class 2, beta polypeptide                        |
| 1554493_s_at,<br>220212_s_at             | thyroid adenoma associated                                                  |
| 201065_s_at, 210891_s_at                 | general transcription factor ii, i, pseudogene 1                            |
| 203254_s_at                              | talin 1                                                                     |
| 205278_at, 206670_s_at,<br>206669_at     | glutamate decarboxylase 1 (brain, 67kda)                                    |
| 204790_at                                | smad, mothers against dpp homolog 7 (drosophila)                            |
| 1565863_at, 202085_at                    | tight junction protein 2 (zona occludens 2)                                 |
| 201577_at                                | non-metastatic cells 1, protein (nm23a) expressed in                        |
| 225035_x_at, 236841_at                   | cxyorf1-related protein                                                     |
| 202593_s_at, 226214_at                   | membrane interacting protein of rgs16                                       |

|                                                       |                                                                                             |
|-------------------------------------------------------|---------------------------------------------------------------------------------------------|
| 226797_at                                             | mbt domain containing 1                                                                     |
| 204032_at, 239908_at                                  | breast cancer anti-estrogen resistance 3                                                    |
| 1556000_s_at, 224945_at,<br>224943_at                 | btb (poz) domain containing 7                                                               |
| 204094_s_at                                           | tsc22 domain family, member 2                                                               |
| 202949_s_at                                           | four and a half lim domains 2                                                               |
| 219033_at                                             | poly (adp-ribose) polymerase family, member 8                                               |
| 220225_at                                             | iroquois homeobox protein 4                                                                 |
| 217775_s_at, 217776_at                                | retinol dehydrogenase 11 (all-trans and 9-cis)                                              |
| 211003_x_at                                           | transglutaminase 2 (c polypeptide,<br>protein-glutamine-gamma-glutamyltransferase)          |
| 202568_s_at, 202569_s_at                              | map/microtubule affinity-regulating kinase 3                                                |
| 218636_s_at, 65884_at                                 | mannosidase, alpha, class 1b, member 1                                                      |
| 213379_at                                             | coenzyme q2 homolog, prenyltransferase (yeast)                                              |
| 221843_s_at, 65438_at                                 | kiaa1609 protein                                                                            |
| 201328_at, 201329_s_at,<br>222303_at                  | v-ets erythroblastosis virus e26 oncogene homolog 2 (avian)                                 |
| 212153_at                                             | pogo transposable element with znf domain                                                   |
| 203578_s_at, 203580_s_at                              | solute carrier family 7 (cationic amino acid transporter, y+ system), member 6              |
| 1552619_a_at,<br>222608_s_at                          | anillin, actin binding protein (scraps homolog, drosophila)                                 |
| 202132_at, 202134_s_at,<br>202133_at                  | ww domain containing transcription regulator 1                                              |
| 1554410_a_at                                          | similar to rcc1-like g exchanging factor-like isoform 1; rcc1-like g exchanging factor-like |
| 225035_x_at, 225995_x_at                              | hypothetical protein loc58481                                                               |
| 244766_at                                             | pi-3-kinase-related kinase smg-1                                                            |
| 244766_at                                             | slc7a5 pseudogene                                                                           |
| 214143_x_at                                           | solute carrier family 36 (proton/amino acid symporter), member 2                            |
| 203641_s_at, 203642_s_at                              | cobl-like 1                                                                                 |
| 204532_x_at, 208596_s_at,<br>215125_s_at, 207126_x_at | udp glucuronosyltransferase 1 family, polypeptide a10                                       |
| 218276_s_at, 234491_s_at,<br>222573_s_at              | salvador homolog 1 (drosophila)                                                             |
| 210087_s_at, 210594_x_at,<br>201875_s_at, 201874_at   | myelin protein zero-like 1                                                                  |
| 213097_s_at                                           | zuotin related factor 1                                                                     |
| 226545_at, 239719_at,<br>229900_at                    | cd109 antigen (gov platelet alloantigens)                                                   |



|                                                                 |                                                                                |
|-----------------------------------------------------------------|--------------------------------------------------------------------------------|
| 219825_at                                                       | cytochrome p450, family 26, subfamily b, polypeptide 1                         |
| 201945_at                                                       | furin (paired basic amino acid cleaving enzyme)                                |
| 214446_at, 244026_at,<br>226982_at, 226099_at                   | elongation factor, rna polymerase ii, 2                                        |
| 223174_at                                                       | btb (poz) domain containing 10                                                 |
| 225926_at, 209452_s_at,<br>225928_at                            | vesicle transport through interaction with t-snares homolog 1b (yeast)         |
| 203840_at, 32088_at                                             | basic leucine zipper nuclear factor 1 (jem-1)                                  |
| 202011_at, 214168_s_at,<br>243184_at                            | tight junction protein 1 (zona occludens 1)                                    |
| 226837_at                                                       | sprouty-related, evh1 domain containing 1                                      |
| 219553_at                                                       | non-metastatic cells 7, protein expressed in (nucleoside-diphosphate kinase)   |
| 204833_at, 213026_at                                            | atg12 autophagy related 12 homolog (s. cerevisiae)                             |
| 227478_at                                                       | hypothetical protein loc284262                                                 |
| 229231_at                                                       | leucine rich repeat containing 37b                                             |
| 216598_s_at                                                     | chemokine (c-c motif) ligand 2                                                 |
| 212704_at                                                       | zinc finger, cchc domain containing 11                                         |
| 218368_s_at                                                     | tumor necrosis factor receptor superfamily, member 12a                         |
| 208960_s_at,<br>1555832_s_at,<br>208961_s_at                    | kruppel-like factor 6                                                          |
| 222913_at, 225140_at                                            | kruppel-like factor 3 (basic)                                                  |
| 203134_at, 212511_at,<br>215236_s_at, 215832_x_at,<br>212506_at | phosphatidylinositol binding clathrin assembly protein                         |
| 200885_at                                                       | ras homolog gene family, member c                                              |
| 202129_s_at, 202131_s_at,<br>202130_at                          | rio kinase 3 (yeast)                                                           |
| 226264_at                                                       | sushi domain containing 1                                                      |
| 223635_s_at                                                     | single stranded dna binding protein 3                                          |
| 233173_x_at                                                     | general transcription factor iiic, polypeptide 5, 63kda                        |
| 225464_at, 225481_at                                            | ferm domain containing 6                                                       |
| 207291_at, 238513_at                                            | proline rich gla (g-carboxyglutamic acid) 4 (transmembrane)                    |
| 212665_at                                                       | tcdd-inducible poly(adp-ribose) polymerase                                     |
| 1554410_a_at,<br>221247_s_at                                    | williams-beuren syndrome chromosome region 16                                  |
| 205595_at                                                       | desmoglein 3 (pemphigus vulgaris antigen)                                      |
| 221676_s_at, 222409_at                                          | coronin, actin binding protein, 1c                                             |
| 206566_at, 212290_at,<br>212295_s_at, 212292_at                 | solute carrier family 7 (cationic amino acid transporter, y+ system), member 1 |

|                                                                   |                                                                    |
|-------------------------------------------------------------------|--------------------------------------------------------------------|
| 218782_s_at, 235266_at,<br>228401_at, 222740_at                   | atpase family, aaa domain containing 2                             |
| 209008_x_at                                                       | keratin 8                                                          |
| 1552618_at, 212799_at,<br>214441_at, 212800_at                    | syntaxin 6                                                         |
| 207127_s_at, 210110_x_at,<br>208990_s_at, 210588_x_at             | heterogeneous nuclear ribonucleoprotein h3 (2h9)                   |
| 203391_at                                                         | fk506 binding protein 2, 13kda                                     |
| 203918_at                                                         | protocadherin 1 (cadherin-like 1)                                  |
| 200810_s_at, 200811_at                                            | cold inducible rna binding protein                                 |
| 215111_s_at, 235315_at                                            | tsc22 domain family, member 1                                      |
| 219836_at                                                         | zinc finger, bed-type containing 2                                 |
| 204004_at, 229515_at,<br>226231_at, 226223_at,<br>204005_s_at     | prkc, apoptosis, wt1, regulator                                    |
| 209093_s_at, 210589_s_at                                          | glucosidase, beta; acid (includes glucosylceramidase)              |
| 204363_at                                                         | coagulation factor iii (thromboplastin, tissue factor)             |
| 1553103_at, 202584_at                                             | nuclear transcription factor, x-box binding 1                      |
| 228765_at                                                         | gtf2i repeat domain containing 2                                   |
| 219921_s_at, 230263_s_at,<br>230207_s_at, 230206_at,<br>222721_at | dedicator of cytokinesis 5                                         |
| 214693_x_at                                                       | kiaa1245                                                           |
| 208309_s_at, 210018_x_at                                          | mucosa associated lymphoid tissue lymphoma translocation gene 1    |
| 52940_at                                                          | single immunoglobulin and toll-interleukin 1 receptor (tir) domain |
| 225623_at                                                         | kiaa1737                                                           |
| 206582_s_at, 212070_at                                            | g protein-coupled receptor 56                                      |
| 201426_s_at                                                       | vimentin                                                           |
| 212615_at, 212616_at                                              | hypothetical protein bc022889                                      |
| 1555420_a_at, 239809_at,<br>238482_at, 204334_at                  | kruppel-like factor 7 (ubiquitous)                                 |
| 230316_at                                                         | sec14-like 2 (s. cerevisiae)                                       |
| 202575_at                                                         | cellular retinoic acid binding protein 2                           |
| 214604_at                                                         | homeobox d11                                                       |
| 201462_at                                                         | secernin 1                                                         |
| 207233_s_at, 226066_at                                            | microphthalmia-associated transcription factor                     |
| 206295_at                                                         | interleukin 18 (interferon-gamma-inducing factor)                  |
| 219665_at                                                         | nudix (nucleoside diphosphate linked moiety x)-type motif 18       |
| 207121_s_at                                                       | mitogen-activated protein kinase 6                                 |
| 212782_x_at                                                       | polymerase (rna) ii (dna directed) polypeptide j, 13.3kda          |

|                                                                                                                                       |                                                                                          |
|---------------------------------------------------------------------------------------------------------------------------------------|------------------------------------------------------------------------------------------|
| 1557905_s_at, 229221_at,<br>217523_at, 216056_at,<br>212063_at, 212014_x_at,<br>210916_s_at, 209835_x_at,<br>204490_s_at, 204489_s_at | cd44 antigen (indian blood group)                                                        |
| 1555594_a_at,<br>201151_s_at, 201152_s_at,<br>201153_s_at, 241681_at,<br>1558111_at                                                   | muscleblind-like (drosophila)                                                            |
| 202393_s_at, 244447_at                                                                                                                | kruppel-like factor 10                                                                   |
| 203431_s_at, 210791_s_at                                                                                                              | rho gtpase-activating protein                                                            |
| 214487_s_at                                                                                                                           | rap2a, member of ras oncogene family                                                     |
| 213844_at                                                                                                                             | homeobox a5                                                                              |
| 226820_at                                                                                                                             | fjl25476 protein                                                                         |
| 203463_s_at, 203464_s_at                                                                                                              | epsin 2                                                                                  |
| 209277_at, 209278_s_at                                                                                                                | tissue factor pathway inhibitor 2                                                        |
| 208690_s_at                                                                                                                           | pdz and lim domain 1 (elfin)                                                             |
| 207391_s_at, 211205_x_at                                                                                                              | phosphatidylinositol-4-phosphate 5-kinase, type i, alpha                                 |
| 217802_s_at, 229353_s_at,<br>222424_s_at                                                                                              | nuclear casein kinase and cyclin-dependent kinase substrate 1                            |
| 201645_at                                                                                                                             | tenascin c (hexabrachion)                                                                |
| 208791_at, 208792_s_at                                                                                                                | clusterin                                                                                |
| 202442_at                                                                                                                             | adaptor-related protein complex 3, sigma 1 subunit                                       |
| 203491_s_at, 203493_s_at,<br>203494_s_at, 209862_s_at,<br>203492_x_at                                                                 | centrosomal protein 57kda                                                                |
| 203814_s_at                                                                                                                           | nad(p)h dehydrogenase, quinone 2                                                         |
| 219936_s_at                                                                                                                           | g protein-coupled receptor 87                                                            |
| 203510_at, 213816_s_at,<br>213807_x_at                                                                                                | met proto-oncogene (hepatocyte growth factor receptor)                                   |
| 228933_at                                                                                                                             | nance-horan syndrome (congenital cataracts and dental anomalies)                         |
| 202431_s_at                                                                                                                           | v-myc myelocytomatosis viral oncogene homolog (avian)                                    |
| 229465_s_at                                                                                                                           | protein tyrosine phosphatase, receptor type, d                                           |
| 202693_s_at, 202695_s_at                                                                                                              | serine/threonine kinase 17a (apoptosis-inducing)                                         |
| 203674_at                                                                                                                             | helicase with zinc finger                                                                |
| 201794_s_at                                                                                                                           | smg-7 homolog, nonsense mediated mrna decay factor (c. elegans)                          |
| 200638_s_at, 200640_at,<br>200641_s_at, 200639_s_at                                                                                   | tyrosine 3-monooxygenase/tryptophan 5-monooxygenase activation protein, zeta polypeptide |
| 208748_s_at, 208749_x_at,<br>210142_x_at                                                                                              | flotillin 1                                                                              |
| 202918_s_at, 202919_at                                                                                                                | preimplantation protein 3                                                                |

|                                                             |                                                               |
|-------------------------------------------------------------|---------------------------------------------------------------|
| 244766_at                                                   | kiaa0220-like protein                                         |
| 200634_at                                                   | profilin 1                                                    |
| 202181_at                                                   | kiaa0247                                                      |
| 203231_s_at, 203232_s_at                                    | ataxin 1                                                      |
| 1555269_a_at, 218804_at                                     | transmembrane protein 16a                                     |
| 209093_s_at, 210589_s_at                                    | glucosidase, beta; acid, pseudogene                           |
| 244766_at                                                   | hypothetical gene loc283846                                   |
| 212057_at                                                   | kiaa0182                                                      |
| 218198_at                                                   | hypothetical protein flj10694                                 |
| 205133_s_at                                                 | heat shock 10kda protein 1 (chaperonin 10)                    |
| 1569362_at, 240655_at, 201952_at                            | activated leukocyte cell adhesion molecule                    |
| 217813_s_at, 222431_at                                      | spindlin                                                      |
| 231714_s_at                                                 | adaptor-related protein complex 4, beta 1 subunit             |
| 201136_at                                                   | proteolipid protein 2 (colonic epithelium-enriched)           |
| 1559425_at, 206099_at                                       | protein kinase c, eta                                         |
| 204726_at                                                   | cadherin 13, h-cadherin (heart)                               |
| 223276_at                                                   | mstp150                                                       |
| 200632_s_at                                                 | n-myc downstream regulated gene 1                             |
| 202012_s_at, 202013_s_at                                    | exostoses (multiple) 2                                        |
| 218907_s_at                                                 | leucine rich repeat containing 61                             |
| 202023_at                                                   | ephrin-a1                                                     |
| 201324_at, 201325_s_at, 213895_at                           | epithelial membrane protein 1                                 |
| 212685_s_at                                                 | dkfzp434n024 protein                                          |
| 202055_at, 202058_s_at, 213741_s_at, 202059_s_at, 202056_at | karyopherin alpha 1 (importin alpha 5)                        |
| 218995_s_at                                                 | endothelin 1                                                  |
| 207540_s_at, 226068_at                                      | spleen tyrosine kinase                                        |
| 210119_at                                                   | potassium inwardly-rectifying channel, subfamily j, member 15 |
| 1552277_a_at, 1555841_at                                    | chromosome 9 open reading frame 30                            |
| 203233_at                                                   | interleukin 4 receptor                                        |
| 201155_s_at, 216205_s_at                                    | mitofusin 2                                                   |
| 201561_s_at                                                 | calsyntenin 1                                                 |
| 202820_at                                                   | aryl hydrocarbon receptor                                     |
| 205192_at                                                   | mitogen-activated protein kinase kinase kinase 14             |
| 223474_at                                                   | chromosome 14 open reading frame 4                            |
| 228284_at                                                   | hypothetical gene supported by bc000228; nm_005077            |
| 203887_s_at, 203888_at                                      | thrombomodulin                                                |

|                                                    |                                                                                        |
|----------------------------------------------------|----------------------------------------------------------------------------------------|
| 218810_at                                          | zinc finger ccch-type containing 12a                                                   |
| 223029_s_at, 223031_s_at                           | tnf receptor-associated factor 7                                                       |
| 221509_at, 234915_s_at, 231896_s_at                | density-regulated protein                                                              |
| 204476_s_at                                        | pyruvate carboxylase                                                                   |
| 207856_s_at                                        | hypothetical protein flj20297                                                          |
| 1552477_a_at, 1552478_a_at                         | interferon regulatory factor 6                                                         |
| 209372_x_at                                        | tubulin, beta 2b                                                                       |
| 207643_s_at                                        | tumor necrosis factor receptor superfamily, member 1a                                  |
| 201579_at                                          | fat tumor suppressor homolog 1 (drosophila)                                            |
| 218224_at                                          | paraneoplastic antigen ma1                                                             |
| 207379_at, 1558643_s_at, 225275_at                 | egf-like repeats and discoidin i-like domains 3                                        |
| 209885_at, 31846_at                                | ras homolog gene family, member d                                                      |
| 201975_at, 210716_s_at                             | restin (reed-steinberg cell-expressed intermediate filament-associated protein)        |
| 209920_at, 210214_s_at, 231873_at, 225144_at       | bone morphogenetic protein receptor, type ii (serine/threonine kinase)                 |
| 202656_s_at, 202657_s_at                           | serta domain containing 2                                                              |
| 203234_at                                          | uridine phosphorylase 1                                                                |
| 209026_x_at, 212320_at, 211714_x_at                | tubulin, beta                                                                          |
| 202308_at                                          | sterol regulatory element binding transcription factor 1                               |
| 228073_at                                          | n-acetylneuraminic acid phosphatase                                                    |
| 202351_at, 232797_at, 236251_at, 241769_at         | integrin, alpha v (vitronectin receptor, alpha polypeptide, antigen cd51)              |
| 207628_s_at                                        | putative methyltransferase                                                             |
| 203065_s_at, 212097_at                             | caveolin 1, caveolae protein, 22kda                                                    |
| 203936_s_at                                        | matrix metalloproteinase 9 (gelatinase b, 92kda gelatinase, 92kda type iv collagenase) |
| 235911_at                                          | hypothetical gene supported by bc034933; bc068085                                      |
| 204538_x_at                                        | nuclear pore complex interacting protein                                               |
| 218849_s_at                                        | protein phosphatase 1, regulatory (inhibitor) subunit 13 like                          |
| 219058_x_at                                        | tubulointerstitial nephritis antigen-like 1                                            |
| 232968_at                                          | fibronectin type iii and ankyrin repeat domains 1                                      |
| 1562022_s_at                                       | rad9 homolog a (s. pombe)                                                              |
| 204532_x_at, 215125_s_at, 208596_s_at, 207126_x_at | udp glucuronosyltransferase 1 family, polypeptide a3                                   |
| 209711_at, 209712_at                               | solute carrier family 35 (udp-glucuronic acid/udp-n-acetylgalactosamine dual           |

|                                                                                                |                                                                                |
|------------------------------------------------------------------------------------------------|--------------------------------------------------------------------------------|
|                                                                                                | transporter), member d1                                                        |
| 201301_s_at, 201302_at                                                                         | annexin a4                                                                     |
| 207657_x_at, 212635_at,<br>225765_at, 225766_s_at,<br>221829_s_at, 209226_s_at,<br>209225_x_at | transportin 1                                                                  |
| 203394_s_at, 203395_s_at                                                                       | hairy and enhancer of split 1, (drosophila)                                    |
| 201110_s_at, 201109_s_at,<br>201108_s_at, 201107_s_at                                          | thrombospondin 1                                                               |
| 206336_at                                                                                      | chemokine (c-x-c motif) ligand 6 (granulocyte chemotactic protein 2)           |
| 220015_at                                                                                      | castor homolog 1, zinc finger (drosophila)                                     |
| 200710_at                                                                                      | acyl-coenzyme a dehydrogenase, very long chain                                 |
| 201289_at, 210764_s_at                                                                         | cysteine-rich, angiogenic inducer, 61                                          |
| 213986_s_at                                                                                    | chromosome 19 open reading frame 6                                             |
| 219856_at, 228865_at                                                                           | hypothetical protein mgc2742                                                   |
| 201398_s_at, 210733_at,<br>201399_s_at                                                         | translocation associated membrane protein 1                                    |
| 225664_at, 231766_s_at                                                                         | collagen, type xii, alpha 1                                                    |
| 203821_at, 38037_at                                                                            | heparin-binding egf-like growth factor                                         |
| 228606_at                                                                                      | hypothetical protein mgc33212                                                  |
| 225005_at                                                                                      | phd finger protein 13                                                          |
| 214693_x_at                                                                                    | hypothetical loc401967                                                         |
| 215501_s_at, 221563_at                                                                         | dual specificity phosphatase 10                                                |
| 229296_at                                                                                      | loc375758                                                                      |
| 209193_at                                                                                      | pim-1 oncogene                                                                 |
| 1556034_s_at                                                                                   | myotubularin related protein 11                                                |
| 208490_x_at                                                                                    | histone 1, h2bd                                                                |
| 211662_s_at                                                                                    | voltage-dependent anion channel 2                                              |
| 235096_at                                                                                      | leo1, paf1/rna polymerase ii complex component, homolog (s. cerevisiae)        |
| 226961_at                                                                                      | hypothetical protein loc222171                                                 |
| 224435_at, 228155_at                                                                           | chromosome 10 open reading frame 58                                            |
| 204342_at                                                                                      | solute carrier family 25 (mitochondrial carrier; phosphate carrier), member 24 |
| 209566_at                                                                                      | insulin induced gene 2                                                         |
| 207717_s_at                                                                                    | plakophilin 2                                                                  |
| 218138_at, 222530_s_at                                                                         | mckusick-kaufman syndrome                                                      |
| 211962_s_at, 211965_at                                                                         | zinc finger protein 36, c3h type-like 1                                        |
| 224724_at                                                                                      | sulfatase 2                                                                    |
| 200758_s_at, 214179_s_at,<br>200759_x_at                                                       | nuclear factor (erythroid-derived 2)-like 1                                    |

|                                                                   |                                                                   |
|-------------------------------------------------------------------|-------------------------------------------------------------------|
| 203220_s_at, 203221_at,<br>228284_at, 203222_s_at                 | transducin-like enhancer of split 1 (e(sp1) homolog, drosophila)  |
| 244766_at                                                         | nuclear pore complex interacting protein pseudogene               |
| 201217_x_at, 211073_x_at,<br>212039_x_at, 211666_x_at             | ribosomal protein l3                                              |
| 202790_at                                                         | claudin 7                                                         |
| 202727_s_at, 211676_s_at                                          | interferon gamma receptor 1                                       |
| 202613_at                                                         | ctp synthase                                                      |
| 201631_s_at                                                       | immediate early response 3                                        |
| 203074_at                                                         | annexin a8                                                        |
| 221432_s_at, 223192_at                                            | solute carrier family 25, member 28                               |
| 218887_at, 229884_s_at                                            | mitochondrial ribosomal protein l2                                |
| 201251_at, 213700_s_at                                            | pyruvate kinase, muscle                                           |
| 218693_at                                                         | tetraspanin 15                                                    |
| 211764_s_at, 214590_s_at                                          | ubiquitin-conjugating enzyme e2d 1 (ubc4/5 homolog, yeast)        |
| 224160_s_at                                                       | acyl-coenzyme a dehydrogenase family, member 9                    |
| 209534_x_at, 222024_s_at,<br>227039_at, 224884_at,<br>221718_s_at | lymphoid blast crisis oncogene                                    |
| 212134_at                                                         | pleckstrin homology-like domain, family b, member 1               |
| 210968_s_at, 214629_x_at,<br>239251_at, 211509_s_at               | reticulon 4                                                       |
| 225231_at, 225234_at,<br>243475_at, 229010_at                     | cas-br-m (murine) ecotropic retroviral transforming sequence      |
| 204636_at                                                         | collagen, type xvii, alpha 1                                      |
| 204373_s_at, 213165_at                                            | centrosomal protein 350kda                                        |
| 244766_at                                                         | slc7a5 pseudogene                                                 |
| 201590_x_at, 210427_x_at,<br>213503_x_at                          | annexin a2                                                        |
| 227717_at                                                         | flj41603 protein                                                  |
| 211296_x_at                                                       | ubiquitin c                                                       |
| 218534_s_at, 222661_at                                            | fetal hypothetical protein                                        |
| 227461_at, 235852_at                                              | stonin 2                                                          |
| 225932_s_at, 225107_at,<br>205292_s_at                            | heterogeneous nuclear ribonucleoprotein a2/b1                     |
| 206421_s_at                                                       | serpin peptidase inhibitor, clade b (ovalbumin), member 7         |
| 201615_x_at, 201616_s_at,<br>212077_at, 201617_x_at               | caldesmon 1                                                       |
| 209649_at, 215044_s_at                                            | signal transducing adaptor molecule (sh3 domain and itam motif) 2 |
| 226245_at, 226246_at                                              | potassium channel tetramerisation domain containing 1             |

|                                                       |                                                                             |
|-------------------------------------------------------|-----------------------------------------------------------------------------|
| 209653_at, 225268_at,<br>225267_at                    | karyopherin alpha 4 (importin alpha 3)                                      |
| 239586_at, 242944_at                                  | family with sequence similarity 83, member a                                |
| 204268_at                                             | s100 calcium binding protein a2                                             |
| 202267_at, 207517_at                                  | laminin, gamma 2                                                            |
| 1554980_a_at,<br>202672_s_at                          | activating transcription factor 3                                           |
| 210095_s_at, 212143_s_at                              | insulin-like growth factor binding protein 3                                |
| 218317_x_at, 233334_x_at                              | gyi-yig domain containing 2                                                 |
| 225049_at                                             | biogenesis of lysosome-related organelles complex-1, subunit 2              |
| 209313_at                                             | xpa binding protein 1, gtpase                                               |
| 218412_s_at                                           | gtf2i repeat domain containing 1                                            |
| 209239_at                                             | nuclear factor of kappa light polypeptide gene enhancer in b-cells 1 (p105) |
| 202487_s_at, 212205_at,<br>227085_at, 212206_s_at     | h2a histone family, member v                                                |
| 217730_at                                             | transmembrane bax inhibitor motif containing 1                              |
| 209270_at                                             | laminin, beta 3                                                             |
| 210732_s_at, 208936_x_at,<br>208934_s_at              | lectin, galactoside-binding, soluble, 8 (galectin 8)                        |
| 213030_s_at                                           | plexin a2                                                                   |
| 202719_s_at, 202720_at                                | testis derived transcript (3 lim domains)                                   |
| 205260_s_at                                           | acylphosphatase 1, erythrocyte (common) type                                |
| 208836_at, 242836_at                                  | atpase, na+/k+ transporting, beta 3 polypeptide                             |
| 204532_x_at, 207126_x_at,<br>215125_s_at, 208596_s_at | udp glucuronosyltransferase 1 family, polypeptide a7                        |
| 202284_s_at                                           | cyclin-dependent kinase inhibitor 1a (p21, cip1)                            |
| 207157_s_at                                           | guanine nucleotide binding protein (g protein), gamma 5                     |
| 200920_s_at, 200921_s_at                              | b-cell translocation gene 1, anti-proliferative                             |
| 201415_at                                             | glutathione synthetase                                                      |
| 204141_at, 209372_x_at                                | tubulin, beta 2a                                                            |
| 203967_at, 203968_s_at                                | cdc6 cell division cycle 6 homolog (s. cerevisiae)                          |
| 1555841_at                                            | transmembrane protein with egf-like and two follistatin-like domains 1      |
| 209675_s_at                                           | heterogeneous nuclear ribonucleoprotein u-like 1                            |
| 205396_at, 205397_x_at,<br>205398_s_at, 239448_at     | smad, mothers against dpp homolog 3 (drosophila)                            |
| 208678_at                                             | atpase, h+ transporting, lysosomal 31kda, v1 subunit e1                     |
| 223322_at                                             | ras association (ralgds/af-6) domain family 5                               |
| 201362_at, 206245_s_at,<br>201363_s_at                | influenza virus ns1a binding protein                                        |
| 222996_s_at, 233955_x_at,                             | cxxc finger 5                                                               |



|                                                                                  |                                                                               |
|----------------------------------------------------------------------------------|-------------------------------------------------------------------------------|
| 224516_s_at                                                                      |                                                                               |
| 203301_s_at                                                                      | cyclin d binding myb-like transcription factor 1                              |
| 208371_s_at                                                                      | ring finger protein 1                                                         |
| 209607_x_at, 210580_x_at,<br>1569522_at                                          | sulfotransferase family, cytosolic, 1a, phenol-preferring, member 3           |
| 236027_at                                                                        | chromosome 10 open reading frame 78                                           |
| 208949_s_at                                                                      | lectin, galactoside-binding, soluble, 3 (galectin 3)                          |
| 209386_at, 215034_s_at                                                           | transmembrane 4 l six family member 1                                         |
| 203038_at, 233609_at                                                             | protein tyrosine phosphatase, receptor type, k                                |
| 204131_s_at, 204132_s_at,<br>242320_at, 210655_s_at                              | forkhead box o3a                                                              |
| 1555487_a_at                                                                     | arp3 actin-related protein 3 homolog b (yeast)                                |
| 212823_s_at                                                                      | spectrin, beta, erythrocytic (includes spherocytosis, clinical type i)        |
| 205286_at, 205287_s_at                                                           | transcription factor ap-2 gamma (activating enhancer binding protein 2 gamma) |
| 202315_s_at, 226602_s_at                                                         | breakpoint cluster region                                                     |
| 225490_at                                                                        | kiaa1557 protein                                                              |
| 206503_x_at, 210362_x_at,<br>211013_x_at, 211012_s_at,<br>211014_s_at, 235508_at | promyelocytic leukemia                                                        |
| 1555920_at, 201091_s_at,<br>200037_s_at                                          | chromobox homolog 3 (hp1 gamma homolog, drosophila)                           |
| 218421_at                                                                        | ceramide kinase                                                               |
| 214599_at                                                                        | involucrin                                                                    |
| 203455_s_at, 210592_s_at,<br>230333_at, 213988_s_at                              | spermidine/spermine n1-acetyltransferase                                      |
| 203313_s_at                                                                      | tgfb-induced factor (tale family homeobox)                                    |
| 226516_at                                                                        | hypothetical protein pp3501                                                   |
| 227586_at, 228505_s_at                                                           | loc124491                                                                     |
| 225589_at                                                                        | sh3 domain containing ring finger 1                                           |
| 213012_at                                                                        | neural precursor cell expressed, developmentally down-regulated 4             |
| 204190_at                                                                        | ubiquitin specific peptidase like 1                                           |
| 203511_s_at, 203512_at                                                           | trafficking protein particle complex 3                                        |
| 200770_s_at, 200771_at,<br>243591_at                                             | laminin, gamma 1 (formerly lamb2)                                             |
| 221012_s_at, 223132_s_at                                                         | tripartite motif-containing 8                                                 |
| 202996_at                                                                        | polymerase (dna-directed), delta 4                                            |
| 210004_at                                                                        | oxidised low density lipoprotein (lectin-like) receptor 1                     |
| 227569_at                                                                        | ligand of numb-protein x 2                                                    |
| 228723_at                                                                        | hypothetical loc283677                                                        |

|                                                               |                                                                                              |
|---------------------------------------------------------------|----------------------------------------------------------------------------------------------|
| 225313_at                                                     | chromosome 20 open reading frame 177                                                         |
| 207856_s_at                                                   | fij41352 protein                                                                             |
| 208920_at, 208921_s_at                                        | sorcin                                                                                       |
| 238058_at                                                     | hypothetical protein loc150381                                                               |
| 212533_at                                                     | wee1 homolog (s. pombe)                                                                      |
| 205933_at                                                     | set binding protein 1                                                                        |
| 217831_s_at, 220248_x_at,<br>232520_s_at                      | p47 (rat)                                                                                    |
| 1553530_a_at,<br>1553678_a_at,<br>211945_s_at                 | integrin, beta 1 (fibronectin receptor, beta polypeptide, antigen cd29 includes mdf2, msk12) |
| 204699_s_at, 214193_s_at,<br>204700_x_at                      | chromosome 1 open reading frame 107                                                          |
| 225176_at                                                     | mstp146                                                                                      |
| 233478_at, 235230_at                                          | phosphatidylinositol-specific phospholipase c, x domain containing 2                         |
| 205479_s_at, 211668_s_at                                      | plasminogen activator, urokinase                                                             |
| 204750_s_at, 226817_at,<br>204751_x_at                        | desmocollin 2                                                                                |
| 222785_x_at, 231530_s_at                                      | chromosome 11 open reading frame 1                                                           |
| 227616_at, 228065_at                                          | b-cell cll/lymphoma 9-like                                                                   |
| 209602_s_at, 209604_s_at                                      | gata binding protein 3                                                                       |
| 203581_at, 203582_s_at                                        | rab4a, member ras oncogene family                                                            |
| 201015_s_at                                                   | junction plakoglobin                                                                         |
| 202982_s_at                                                   | acyl-coa thioesterase 2                                                                      |
| 205017_s_at, 232138_at,<br>236699_at, 236067_at,<br>232369_at | muscleblind-like 2 (drosophila)                                                              |
| 220547_s_at                                                   | family with sequence similarity 35, member a                                                 |
| 205573_s_at                                                   | dkfzp564f052 protein                                                                         |
| 200983_x_at, 212463_at,<br>200985_s_at, 200984_s_at           | cd59 antigen, complement regulatory protein                                                  |
| 224908_s_at                                                   | tubulin tyrosine ligase                                                                      |
| 212966_at                                                     | hypermethylated in cancer 2                                                                  |
| 202440_s_at                                                   | suppression of tumorigenicity 5                                                              |
| 224857_s_at, 224874_at                                        | hypothetical protein mgc9850                                                                 |
| 203173_s_at                                                   | esophageal cancer associated protein                                                         |
| 226829_at                                                     | kiaa1914                                                                                     |
| 218366_x_at, 223988_x_at,<br>223528_s_at                      | fij20859 gene                                                                                |
| 207785_s_at, 211974_x_at                                      | recombining binding protein suppressor of hairless (drosophila)                              |

|                                                       |                                                                         |
|-------------------------------------------------------|-------------------------------------------------------------------------|
| 210649_s_at, 212152_x_at                              | at rich interactive domain 1a (swi- like)                               |
| 227309_at                                             | yod1 otu deubiquinating enzyme 1 homolog ( yeast)                       |
| 202756_s_at                                           | glypican 1                                                              |
| 225467_s_at                                           | retinol dehydrogenase 13 (all-trans and 9-cis)                          |
| 204532_x_at, 207126_x_at,<br>208596_s_at, 215125_s_at | udp glucuronosyltransferase 1 family, polypeptide a4                    |
| 201976_s_at                                           | myosin x                                                                |
| 211986_at, 220016_at                                  | ahnak nucleoprotein (desmoyokin)                                        |
| 214580_x_at                                           | keratin 6e                                                              |
| 221763_at, 224933_s_at,<br>228793_at                  | thyroid hormone receptor interactor 8                                   |
| 207667_s_at, 215498_s_at,<br>215499_at                | mitogen-activated protein kinase kinase 3                               |
| 218268_at                                             | tbc1 domain family, member 15                                           |
| 206748_s_at, 212470_at                                | sperm associated antigen 9                                              |
| 218585_s_at, 222680_s_at                              | denticleless homolog (drosophila)                                       |
| 228138_at, 242621_at                                  | zinc finger protein 498                                                 |
| 208898_at, 208899_x_at                                | atpase, h+ transporting, lysosomal 34kda, v1 subunit d                  |
| 200709_at, 210186_s_at,<br>214119_s_at                | fk506 binding protein 1a, 12kda                                         |
| 201231_s_at                                           | enolase 1, (alpha)                                                      |
| 218898_at                                             | family with sequence similarity 57, member a                            |
| 221059_s_at, 224583_at                                | coactosin-like 1 (dictyostelium)                                        |
| 201340_s_at, 201341_at                                | ectodermal-neural cortex (with btb-like domain)                         |
| 209191_at                                             | tubulin, beta 6                                                         |
| 209048_s_at                                           | protein kinase c binding protein 1                                      |
| 200796_s_at, 200798_x_at,<br>200797_s_at              | myeloid cell leukemia sequence 1 (bcl2-related)                         |
| 204765_at                                             | rho guanine nucleotide exchange factor (gef) 5                          |
| 223748_at                                             | solute carrier family 4, sodium bicarbonate transporter-like, member 11 |
| 211926_s_at                                           | myosin, heavy polypeptide 9, non-muscle                                 |
| 213605_s_at                                           | glucuronidase, beta-like 2                                              |
| 218292_s_at, 233748_x_at,<br>222582_at                | protein kinase, amp-activated, gamma 2 non-catalytic subunit            |
| 226602_s_at                                           | similar to breakpoint cluster region isoform 1                          |
| 205680_at                                             | matrix metalloproteinase 10 (stromelysin 2)                             |
| 219041_s_at                                           | zinc finger protein                                                     |
| 209512_at, 209513_s_at                                | hydroxysteroid dehydrogenase like 2                                     |
| 203499_at                                             | eph receptor a2                                                         |
| 205020_s_at                                           | adp-ribosylation factor-like 4a                                         |

|                                                     |                                                                                                   |
|-----------------------------------------------------|---------------------------------------------------------------------------------------------------|
| 206429_at                                           | coagulation factor ii (thrombin) receptor-like 1                                                  |
| 212296_at                                           | proteasome (prosome, macropain) 26s subunit, non-atpase, 14                                       |
| 200671_s_at, 226342_at,<br>215918_s_at, 200672_x_at | spectrin, beta, non-erythrocytic 1                                                                |
| 1556385_at, 219500_at                               | cardiotrophin-like cytokine factor 1                                                              |
| 209351_at                                           | keratin 14 (epidermolysis bullosa simplex, dowling-meara, koebner)                                |
| 224685_at                                           | myeloid/lymphoid or mixed-lineage leukemia (trithorax homolog, drosophila);<br>translocated to, 4 |
| 206127_at, 221773_at                                | elk3, ets-domain protein (srf accessory protein 2)                                                |
| 212447_at, 223585_x_at,<br>223584_s_at              | kelch repeat and btb (poz) domain containing 2                                                    |
| 213353_at                                           | atp-binding cassette, sub-family a (abc1), member 5                                               |
| 212602_at                                           | wd repeat and fyve domain containing 3                                                            |
| 203753_at, 222146_s_at                              | transcription factor 4                                                                            |
| 201403_s_at                                         | microsomal glutathione s-transferase 3                                                            |
| 206050_s_at                                         | ribonuclease/angiogenin inhibitor 1                                                               |
| 207069_s_at                                         | smad, mothers against dpp homolog 6 (drosophila)                                                  |
| 225129_at                                           | copine ii                                                                                         |
| 218414_s_at, 222625_s_at,<br>230219_at              | nude nuclear distribution gene e homolog 1 (a. nidulans)                                          |
| 227263_at                                           | pdz-lim protein mystique                                                                          |
| 1553096_s_at,<br>1558143_a_at                       | bcl2-like 11 (apoptosis facilitator)                                                              |
| 213923_at, 214487_s_at                              | rap2b, member of ras oncogene family                                                              |
| 207467_x_at, 212586_at,<br>208908_s_at              | calpastatin                                                                                       |
| 228220_at                                           | fch domain only 2                                                                                 |
| 200892_s_at, 200893_at,<br>210180_s_at              | splicing factor, arginine/serine-rich 10 (transformer 2 homolog, drosophila)                      |
| 225847_at                                           | arylamide deacetylase-like 1                                                                      |
| 203366_at                                           | polymerase (dna directed), gamma                                                                  |
| 201920_at, 230494_at                                | solute carrier family 20 (phosphate transporter), member 1                                        |
| 223326_s_at                                         | hypothetical protein flj22795                                                                     |
| 218399_s_at                                         | cell division cycle associated 4                                                                  |
| 209537_at                                           | exostoses (multiple)-like 2                                                                       |
| 203574_at                                           | nuclear factor, interleukin 3 regulated                                                           |
| 205401_at, 225114_at,<br>225113_at                  | alkylglycerone phosphate synthase                                                                 |
| 208807_s_at                                         | chromodomain helicase dna binding protein 3                                                       |
| 203453_at                                           | sodium channel, nonvoltage-gated 1 alpha                                                          |

|                                           |                                                                                               |
|-------------------------------------------|-----------------------------------------------------------------------------------------------|
| 217875_s_at                               | transmembrane, prostate androgen induced rna                                                  |
| 200013_at, 214143_x_at                    | ribosomal protein l24                                                                         |
| 1555551_at, 204855_at                     | serpin peptidase inhibitor, clade b (ovalbumin), member 5                                     |
| 225770_at, 225774_at, 225773_at           | ring finger and spry domain containing 1                                                      |
| 206632_s_at                               | apolipoprotein b mrna editing enzyme, catalytic polypeptide-like 3b                           |
| 235753_at                                 | hypothetical protein loc285944                                                                |
| 201798_s_at, 211864_s_at, 217518_at       | fer-1-like 3, myoferlin (c. elegans)                                                          |
| 222414_at, 222415_at                      | myeloid/lymphoid or mixed-lineage leukemia 3                                                  |
| 209339_at                                 | seven in absentia homolog 2 (drosophila)                                                      |
| 204240_s_at, 213253_at                    | smc2 structural maintenance of chromosomes 2-like 1 (yeast)                                   |
| 223172_s_at                               | mitochondrial protein 18 kda                                                                  |
| 201270_x_at                               | nudc domain containing 3                                                                      |
| 213893_x_at                               | postmeiotic segregation increased 2-like 5                                                    |
| 1555996_s_at, 200912_s_at                 | eukaryotic translation initiation factor 4a, isoform 2                                        |
| 218923_at, 218924_s_at                    | chitobiase, di-n-acetyl-                                                                      |
| 202628_s_at, 1568765_at, 202627_s_at      | serpin peptidase inhibitor, clade e (nexin, plasminogen activator inhibitor type 1), member 1 |
| 231849_at                                 | hypothetical protein loc144501                                                                |
| 221799_at, 55093_at                       | chondroitin sulfate glucuronyltransferase                                                     |
| 225688_s_at, 238419_at                    | pleckstrin homology-like domain, family b, member 2                                           |
| 222250_s_at                               | chromosome 1 open reading frame 73                                                            |
| 204461_x_at, 210216_x_at, 204460_s_at     | rad1 homolog (s. pombe)                                                                       |
| 225524_at                                 | anthrax toxin receptor 2                                                                      |
| 202565_s_at, 202566_s_at                  | supervillin                                                                                   |
| 205566_at, 225337_at, 228490_at, 63825_at | abhydrolase domain containing 2                                                               |
| 213075_at                                 | olfactomedin-like 2a                                                                          |
| 212689_s_at                               | jumonji domain containing 1a                                                                  |
| 204247_s_at                               | cyclin-dependent kinase 5                                                                     |
| 218113_at                                 | transmembrane protein 2                                                                       |
| 1555255_a_at, 204578_at                   | histidine acid phosphatase domain containing 2a                                               |
| 229558_at                                 | similar to tsg118.1                                                                           |
| 218848_at                                 | tho complex 6 homolog (drosophila)                                                            |
| 227072_at                                 | rotatin                                                                                       |
| 205807_s_at                               | tuftelin 1                                                                                    |
| 208445_s_at                               | williams-beuren syndrome chromosome region 10                                                 |

|                                                           |                                                                                                                                                                                                                                                                                        |
|-----------------------------------------------------------|----------------------------------------------------------------------------------------------------------------------------------------------------------------------------------------------------------------------------------------------------------------------------------------|
| 202481_at, 238032_at                                      | dehydrogenase/reductase (sdr family) member 3                                                                                                                                                                                                                                          |
| 218708_at                                                 | ntf2-like export factor 1                                                                                                                                                                                                                                                              |
| 226575_at                                                 | zinc finger protein 462                                                                                                                                                                                                                                                                |
| 221779_at, 55081_at                                       | mical-like 1                                                                                                                                                                                                                                                                           |
| 200931_s_at                                               | vinculin                                                                                                                                                                                                                                                                               |
| 217744_s_at, 222392_x_at                                  | perp, tp53 apoptosis effector                                                                                                                                                                                                                                                          |
| 225120_at, 226762_at, 235711_at, 227718_at                | purine-rich element binding protein b                                                                                                                                                                                                                                                  |
| 219953_s_at, 242515_x_at                                  | chromosome 11 open reading frame 17                                                                                                                                                                                                                                                    |
| 218537_at, 45714_at                                       | host cell factor c1 regulator 1 (xpo1 dependent)                                                                                                                                                                                                                                       |
| 225596_at                                                 | kinesin light chain 4                                                                                                                                                                                                                                                                  |
| 231022_at                                                 | ,consensus includes gb:ai139990 /fea=est /db_xref=gi:3647447 /db_xref=est:qa47d03.x1 /clone=image:1689893 /ug=hs.134586 ests,gb:ai139990 /db_xref=gi:3647447 /db_xref=qa47d03.x1 /clone=image:1689893 /fea=est /cnt=9 /tid=hs.134586.0 /tier=stack /stk=8 /ug=hs.134586 /ug_title=ests |
| 206621_s_at                                               | williams-beuren syndrome chromosome region 1                                                                                                                                                                                                                                           |
| 221873_at                                                 | zinc finger protein 143 (clone phz-1)                                                                                                                                                                                                                                                  |
| 226763_at                                                 | sec14 and spectrin domains 1                                                                                                                                                                                                                                                           |
| 200851_s_at                                               | kiaa0174                                                                                                                                                                                                                                                                               |
| 202712_s_at                                               | creatine kinase, mitochondrial 1b                                                                                                                                                                                                                                                      |
| 1558014_s_at, 224866_at, 224865_at                        | male sterility domain containing 2                                                                                                                                                                                                                                                     |
| 223014_at                                                 | ubiquitin-conjugating enzyme e2r 2                                                                                                                                                                                                                                                     |
| 207223_s_at, 214698_at, 224618_at, 224617_at, 214697_s_at | rod1 regulator of differentiation 1 (s. pombe)                                                                                                                                                                                                                                         |
| 205264_at                                                 | cd3e antigen, epsilon polypeptide associated protein                                                                                                                                                                                                                                   |
| 225411_at, 225412_at                                      | transmembrane protein 87b                                                                                                                                                                                                                                                              |
| 201195_s_at                                               | solute carrier family 7 (cationic amino acid transporter, y+ system), member 5                                                                                                                                                                                                         |
| 219222_at                                                 | ribokinase                                                                                                                                                                                                                                                                             |
| 212028_at, 212033_at, 212031_at, 212030_at                | rna binding motif protein 25                                                                                                                                                                                                                                                           |
| 218501_at                                                 | rho guanine nucleotide exchange factor (gef) 3                                                                                                                                                                                                                                         |
| 219024_at, 226247_at                                      | pleckstrin homology domain containing, family a (phosphoinositide binding specific) member 1                                                                                                                                                                                           |
| 206034_at                                                 | serpin peptidase inhibitor, clade b (ovalbumin), member 8                                                                                                                                                                                                                              |
| 212445_s_at, 212448_at                                    | neural precursor cell expressed, developmentally down-regulated 4-like                                                                                                                                                                                                                 |
| 1557527_at, 209360_s_at,                                  | runt-related transcription factor 1 (acute myeloid leukemia 1; aml1                                                                                                                                                                                                                    |

|                                                    |                                                                                                                                                  |
|----------------------------------------------------|--------------------------------------------------------------------------------------------------------------------------------------------------|
| 236114_at                                          | oncogene)                                                                                                                                        |
| 207821_s_at, 208820_at                             | ptk2 protein tyrosine kinase 2                                                                                                                   |
| 200946_x_at, 200947_s_at                           | glutamate dehydrogenase 1                                                                                                                        |
| 1555812_a_at, 201288_at                            | rho gdp dissociation inhibitor (gdi) beta                                                                                                        |
| 219177_at                                          | brix domain containing 2                                                                                                                         |
| 209699_x_at                                        | aldo-keto reductase family 1, member c2 (dihydrodiol dehydrogenase 2; bile acid binding protein; 3-alpha hydroxysteroid dehydrogenase, type iii) |
| 223796_at                                          | contactin associated protein-like 3b                                                                                                             |
| 211031_s_at                                        | cytoplasmic linker 2                                                                                                                             |
| 220048_at                                          | ectodysplasin a receptor                                                                                                                         |
| 220800_s_at, 223077_at, 223078_s_at                | tropomodulin 3 (ubiquitous)                                                                                                                      |
| 224764_at                                          | rho gtpase activating protein 21                                                                                                                 |
| 209432_s_at                                        | camp responsive element binding protein 3                                                                                                        |
| 203047_at, 40420_at                                | serine/threonine kinase 10                                                                                                                       |
| 1555780_a_at, 201453_x_at                          | ras homolog enriched in brain                                                                                                                    |
| 209579_s_at, 209580_s_at, 214047_s_at, 214048_at   | methyl-cpg binding domain protein 4                                                                                                              |
| 1558393_at, 209016_s_at                            | keratin 7                                                                                                                                        |
| 203367_at                                          | dual specificity phosphatase 14                                                                                                                  |
| 208153_s_at                                        | fat tumor suppressor homolog 2 (drosophila)                                                                                                      |
| 207526_s_at, 242809_at, 234066_at                  | interleukin 1 receptor-like 1                                                                                                                    |
| 219749_at                                          | sh2 domain containing 4a                                                                                                                         |
| 202392_s_at                                        | phosphatidylserine decarboxylase                                                                                                                 |
| 204136_at                                          | collagen, type vii, alpha 1 (epidermolysis bullosa, dystrophic, dominant and recessive)                                                          |
| 225299_at, 225301_s_at                             | myosin vb                                                                                                                                        |
| 207871_s_at                                        | suppression of tumorigenicity 7                                                                                                                  |
| 214580_x_at                                        | keratin 6c                                                                                                                                       |
| 200637_s_at, 200635_s_at, 200636_s_at              | protein tyrosine phosphatase, receptor type, f                                                                                                   |
| 217727_x_at, 233864_s_at, 222387_s_at, 222388_s_at | vacuolar protein sorting 35 (yeast)                                                                                                              |
| 219696_at                                          | hypothetical protein flj20054                                                                                                                    |
| 223233_s_at                                        | cingulin                                                                                                                                         |
| 209101_at                                          | connective tissue growth factor                                                                                                                  |
| 225533_at, 227212_s_at, 227211_at                  | phd finger protein 19                                                                                                                            |

|                                                       |                                                                                                                                                                                                                                                                                                      |
|-------------------------------------------------------|------------------------------------------------------------------------------------------------------------------------------------------------------------------------------------------------------------------------------------------------------------------------------------------------------|
| 230660_at                                             | serta domain containing 4                                                                                                                                                                                                                                                                            |
| 207243_s_at, 235190_at                                | calmodulin 1 (phosphorylase kinase, delta)                                                                                                                                                                                                                                                           |
| 205203_at, 226636_at,<br>215723_s_at, 232530_at       | phospholipase d1, phosphatidylcholine-specific                                                                                                                                                                                                                                                       |
| 241464_s_at                                           | ,consensus includes gb:ai973033 /fea=est /db_xref=gi:5769859<br>/db_xref=est:wr46g03.x1 /clone=image:2490772 /ug=hs.126691<br>ests,gb:ai973033 /db_xref=gi:5769859 /db_xref=wr46g03.x1<br>/clone=image:2490772 /fea=est /cnt=5 /tid=hs.126691.1 /tier=consend<br>/stk=4 /ug=hs.126691 /ug_title=ests |
| 213605_s_at                                           | similar to sma5 protein                                                                                                                                                                                                                                                                              |
| 212048_s_at                                           | tyrosyl-trna synthetase                                                                                                                                                                                                                                                                              |
| 202518_at                                             | b-cell cll/lymphoma 7b                                                                                                                                                                                                                                                                               |
| 219151_s_at, 220500_s_at                              | rab, member of ras oncogene family-like 2b                                                                                                                                                                                                                                                           |
| 244054_at, 217591_at,<br>206675_s_at                  | ski-like                                                                                                                                                                                                                                                                                             |
| 218347_at                                             | radical s-adenosyl methionine and flavodoxin domains 1                                                                                                                                                                                                                                               |
| 1555355_a_at, 241435_at,<br>214447_at                 | v-ets erythroblastosis virus e26 oncogene homolog 1 (avian)                                                                                                                                                                                                                                          |
| 231876_at                                             | tripartite motif-containing 56                                                                                                                                                                                                                                                                       |
| 222989_s_at, 222991_s_at,<br>222990_at                | ubiquilin 1                                                                                                                                                                                                                                                                                          |
| 218078_s_at                                           | zinc finger, dhhc-type containing 3                                                                                                                                                                                                                                                                  |
| 223839_s_at                                           | stearoyl-coa desaturase (delta-9-desaturase)                                                                                                                                                                                                                                                         |
| 238017_at                                             | retinal short chain dehydrogenase reductase isoform 1                                                                                                                                                                                                                                                |
| 1559759_at                                            | kinesin family member c3                                                                                                                                                                                                                                                                             |
| 214390_s_at, 214452_at,<br>225285_at                  | branched chain aminotransferase 1, cytosolic                                                                                                                                                                                                                                                         |
| 226390_at                                             | start domain containing 4, sterol regulated                                                                                                                                                                                                                                                          |
| 202196_s_at, 232947_at,<br>214247_s_at, 230508_at     | dickkopf homolog 3 (xenopus laevis)                                                                                                                                                                                                                                                                  |
| 223498_at, 240765_at                                  | spectrin domain with coiled-coils 1                                                                                                                                                                                                                                                                  |
| 222760_at                                             | zinc finger protein 703                                                                                                                                                                                                                                                                              |
| 221620_s_at                                           | hypothetical protein mgc4825                                                                                                                                                                                                                                                                         |
| 202211_at                                             | adp-ribosylation factor gtpase activating protein 3                                                                                                                                                                                                                                                  |
| 212202_s_at, 212204_at                                | transmembrane protein 87a                                                                                                                                                                                                                                                                            |
| 1552703_s_at                                          | caspase-1 dominant-negative inhibitor pseudo-ice                                                                                                                                                                                                                                                     |
| 1553906_s_at                                          | fyve, rhogef and ph domain containing 2                                                                                                                                                                                                                                                              |
| 204532_x_at, 208596_s_at,<br>215125_s_at, 207126_x_at | udp glucuronosyltransferase 1 family, polypeptide a8                                                                                                                                                                                                                                                 |
| 1555240_s_at, 212294_at,                              | guanine nucleotide binding protein (g protein), gamma 12                                                                                                                                                                                                                                             |



|                                   |                                                                                                 |
|-----------------------------------|-------------------------------------------------------------------------------------------------|
| 222834_s_at                       |                                                                                                 |
| 226929_at                         | 5,10-methylenetetrahydrofolate reductase (nadph)                                                |
| 202761_s_at                       | spectrin repeat containing, nuclear envelope 2                                                  |
| 1552703_s_at                      | caspase 1, apoptosis-related cysteine peptidase (interleukin 1, beta, convertase)               |
| 202123_s_at                       | v-abl abelson murine leukemia viral oncogene homolog 1                                          |
| 201820_at, 213240_s_at            | keratin 4                                                                                       |
| 227379_at                         | o-acyltransferase (membrane bound) domain containing 1                                          |
| 226217_at, 226601_at              | solute carrier family 30 (zinc transporter), member 7                                           |
| 226026_at                         | disrupted in renal carcinoma 2                                                                  |
| 226586_at, 235903_at              | ankyrin repeat and sterile alpha motif domain containing 6                                      |
| 1561330_at                        | desmoglein 4                                                                                    |
| 218520_at                         | tank-binding kinase 1                                                                           |
| 202620_s_at                       | procollagen-lysine, 2-oxoglutarate 5-dioxygenase 2                                              |
| 202500_at                         | dnaj (hsp40) homolog, subfamily b, member 2                                                     |
| 1555680_a_at,<br>210357_s_at      | spermine oxidase                                                                                |
| 214684_at                         | mads box transcription enhancer factor 2, polypeptide a (myocyte enhancer factor 2a)            |
| 201695_s_at                       | nucleoside phosphorylase                                                                        |
| 224950_at                         | prostaglandin f2 receptor negative regulator                                                    |
| 212458_at                         | sprouty-related, evh1 domain containing 2                                                       |
| 201506_at                         | transforming growth factor, beta-induced, 68kda                                                 |
| 211320_s_at                       | protein tyrosine phosphatase, receptor type, u                                                  |
| 205032_at                         | integrin, alpha 2 (cd49b, alpha 2 subunit of vla-2 receptor)                                    |
| 225593_at                         | lsm10, u7 small nuclear rna associated                                                          |
| 204538_x_at                       | hypothetical protein loc339047                                                                  |
| 204119_s_at, 204120_s_at          | adenosine kinase                                                                                |
| 218417_s_at, 48106_at             | hypothetical protein flj20489                                                                   |
| 202111_at                         | solute carrier family 4, anion exchanger, member 2 (erythrocyte membrane protein band 3-like 1) |
| 202800_at                         | solute carrier family 1 (glial high affinity glutamate transporter), member 3                   |
| 218796_at, 229545_at,<br>60474_at | chromosome 20 open reading frame 42                                                             |
| 205246_at                         | peroxisome biogenesis factor 13                                                                 |
| 203258_at                         | dr1-associated protein 1 (negative cofactor 2 alpha)                                            |
| 202501_at, 213489_at              | microtubule-associated protein, rp/eb family, member 2                                          |
| 227811_at                         | fyve, rhogef and ph domain containing 3                                                         |
| 225612_s_at                       | udp-glcnaac:betagal beta-1,3-n-acetylglucosaminyltransferase 5                                  |
| 225544_at                         | t-box 3 (ulnar mammary syndrome)                                                                |

|                                        |                                                                                       |
|----------------------------------------|---------------------------------------------------------------------------------------|
| 201032_at                              | bladder cancer associated protein                                                     |
| 205211_s_at                            | ras and rab interactor 1                                                              |
| 202239_at                              | poly (adp-ribose) polymerase family, member 4                                         |
| 224562_at                              | was protein family, member 2                                                          |
| 202228_s_at, 242865_at                 | neuroplastin                                                                          |
| 200976_s_at, 213786_at,<br>200977_s_at | tax1 (human t-cell leukemia virus type i) binding protein 1                           |
| 218352_at                              | regulator of chromosome condensation (rcc1) and btb (poz) domain containing protein 1 |

**SUPPLEMENTAL TABLE S3.** Complete list of Smad2/3 binding regions ( $p < 10^{-4}$ ).

| Chromosome | start    | end      |
|------------|----------|----------|
| chr1       | 18870    | 19606    |
| chr1       | 461036   | 461718   |
| chr1       | 602545   | 603263   |
| chr1       | 1687347  | 1688090  |
| chr1       | 6606819  | 6607793  |
| chr1       | 6607794  | 6608124  |
| chr1       | 8019154  | 8020087  |
| chr1       | 8022221  | 8023184  |
| chr1       | 8519843  | 8520417  |
| chr1       | 8867640  | 8868214  |
| chr1       | 8874369  | 8875053  |
| chr1       | 9819032  | 9820769  |
| chr1       | 10687313 | 10688432 |
| chr1       | 11799324 | 11800334 |
| chr1       | 11973912 | 11974847 |
| chr1       | 12612314 | 12614045 |
| chr1       | 15596131 | 15597014 |
| chr1       | 16230469 | 16231239 |
| chr1       | 16235645 | 16236462 |
| chr1       | 16585130 | 16586022 |
| chr1       | 16586023 | 16586659 |
| chr1       | 16737795 | 16739275 |
| chr1       | 16811709 | 16813245 |
| chr1       | 16967796 | 16968713 |
| chr1       | 17512880 | 17513532 |
| chr1       | 17513533 | 17513888 |
| chr1       | 18974658 | 18975232 |
| chr1       | 19996829 | 19997775 |
| chr1       | 19998234 | 19998943 |
| chr1       | 22046289 | 22047212 |
| chr1       | 22071219 | 22072219 |
| chr1       | 22090627 | 22091231 |
| chr1       | 22097620 | 22098326 |
| chr1       | 23266161 | 23266782 |
| chr1       | 23266783 | 23267109 |
| chr1       | 23268341 | 23269467 |
| chr1       | 23630869 | 23631443 |

|      |          |          |
|------|----------|----------|
| chr1 | 24189453 | 24190151 |
| chr1 | 24388654 | 24389486 |
| chr1 | 24390727 | 24391984 |
| chr1 | 24393581 | 24394639 |
| chr1 | 26362234 | 26363076 |
| chr1 | 26367726 | 26368677 |
| chr1 | 26388402 | 26389353 |
| chr1 | 26702614 | 26704145 |
| chr1 | 26863834 | 26864874 |
| chr1 | 26871727 | 26874000 |
| chr1 | 26874634 | 26875208 |
| chr1 | 26875384 | 26876362 |
| chr1 | 26917682 | 26918779 |
| chr1 | 27165483 | 27166326 |
| chr1 | 27500876 | 27501613 |
| chr1 | 28665796 | 28666484 |
| chr1 | 29383546 | 29384611 |
| chr1 | 30898288 | 30899107 |
| chr1 | 31210715 | 31211439 |
| chr1 | 31564439 | 31565090 |
| chr1 | 31708347 | 31709117 |
| chr1 | 31709198 | 31711342 |
| chr1 | 32951085 | 32951801 |
| chr1 | 33097448 | 33098205 |
| chr1 | 33115665 | 33116276 |
| chr1 | 33116277 | 33116576 |
| chr1 | 33391473 | 33392268 |
| chr1 | 33567881 | 33568948 |
| chr1 | 33949332 | 33950226 |
| chr1 | 36284110 | 36285081 |
| chr1 | 36285082 | 36285955 |
| chr1 | 36434385 | 36435398 |
| chr1 | 36520469 | 36521990 |
| chr1 | 37606025 | 37607262 |
| chr1 | 37608457 | 37609203 |
| chr1 | 39251405 | 39252815 |
| chr1 | 40174436 | 40175010 |
| chr1 | 41115336 | 41116099 |
| chr1 | 42300134 | 42301066 |
| chr1 | 43507502 | 43508571 |

|      |          |          |
|------|----------|----------|
| chr1 | 43671840 | 43672710 |
| chr1 | 44064362 | 44065007 |
| chr1 | 44460936 | 44462016 |
| chr1 | 44941503 | 44943141 |
| chr1 | 45656261 | 45657420 |
| chr1 | 51413348 | 51414041 |
| chr1 | 52729782 | 52730542 |
| chr1 | 53503327 | 53504216 |
| chr1 | 54431206 | 54431780 |
| chr1 | 54585285 | 54587711 |
| chr1 | 54719157 | 54720840 |
| chr1 | 58753083 | 58754078 |
| chr1 | 58754541 | 58755806 |
| chr1 | 58761631 | 58762892 |
| chr1 | 62498892 | 62499849 |
| chr1 | 64349387 | 64350358 |
| chr1 | 67230471 | 67231144 |
| chr1 | 67860093 | 67861535 |
| chr1 | 67863948 | 67865148 |
| chr1 | 68009516 | 68010420 |
| chr1 | 72461976 | 72463043 |
| chr1 | 77809908 | 77810482 |
| chr1 | 78156755 | 78157732 |
| chr1 | 84683006 | 84683712 |
| chr1 | 84683713 | 84684593 |
| chr1 | 84810070 | 84811304 |
| chr1 | 84812522 | 84813709 |
| chr1 | 85379402 | 85380531 |
| chr1 | 85456175 | 85457204 |
| chr1 | 85750811 | 85751610 |
| chr1 | 85754144 | 85754823 |
| chr1 | 85757526 | 85758365 |
| chr1 | 87508609 | 87509183 |
| chr1 | 90170324 | 90170898 |
| chr1 | 93859140 | 93859968 |
| chr1 | 94055628 | 94056590 |
| chr1 | 94087004 | 94087578 |
| chr1 | 94477549 | 94478446 |
| chr1 | 94716825 | 94717646 |
| chr1 | 94718099 | 94718673 |

|      |           |           |
|------|-----------|-----------|
| chr1 | 94718674  | 94719036  |
| chr1 | 98839600  | 98840382  |
| chr1 | 101072223 | 101072874 |
| chr1 | 108453883 | 108454493 |
| chr1 | 108454953 | 108455675 |
| chr1 | 110731260 | 110732057 |
| chr1 | 110732058 | 110732972 |
| chr1 | 112718842 | 112719659 |
| chr1 | 112959467 | 112960445 |
| chr1 | 113210291 | 113210865 |
| chr1 | 113643390 | 113644322 |
| chr1 | 114159186 | 114160052 |
| chr1 | 114865104 | 114866084 |
| chr1 | 114923145 | 114923754 |
| chr1 | 114924731 | 114925305 |
| chr1 | 115554473 | 115556023 |
| chr1 | 116877227 | 116878019 |
| chr1 | 117160897 | 117162421 |
| chr1 | 120322724 | 120325317 |
| chr1 | 120529030 | 120529604 |
| chr1 | 141390545 | 141391119 |
| chr1 | 141466344 | 141467327 |
| chr1 | 141902851 | 141905402 |
| chr1 | 141916045 | 141918372 |
| chr1 | 141918744 | 141919760 |
| chr1 | 142083141 | 142085653 |
| chr1 | 142096294 | 142098587 |
| chr1 | 142099203 | 142099974 |
| chr1 | 142474813 | 142475387 |
| chr1 | 142697128 | 142699760 |
| chr1 | 143232239 | 143233765 |
| chr1 | 143550854 | 143551468 |
| chr1 | 143551672 | 143552534 |
| chr1 | 143867746 | 143868458 |
| chr1 | 143868459 | 143869677 |
| chr1 | 144372898 | 144374369 |
| chr1 | 145031624 | 145034135 |
| chr1 | 145044836 | 145047094 |
| chr1 | 145047491 | 145048507 |
| chr1 | 145335733 | 145337114 |

|      |           |           |
|------|-----------|-----------|
| chr1 | 146387880 | 146388490 |
| chr1 | 146389256 | 146391548 |
| chr1 | 146402267 | 146404775 |
| chr1 | 146616794 | 146617859 |
| chr1 | 146625692 | 146628092 |
| chr1 | 146634974 | 146637374 |
| chr1 | 146645041 | 146646280 |
| chr1 | 146671296 | 146672100 |
| chr1 | 146721778 | 146723137 |
| chr1 | 146723689 | 146724992 |
| chr1 | 147363543 | 147364899 |
| chr1 | 147855486 | 147857033 |
| chr1 | 147980489 | 147981393 |
| chr1 | 147983107 | 147983935 |
| chr1 | 148243213 | 148244374 |
| chr1 | 148298709 | 148299648 |
| chr1 | 148324753 | 148326210 |
| chr1 | 148777061 | 148779227 |
| chr1 | 148779286 | 148780347 |
| chr1 | 148784107 | 148785378 |
| chr1 | 148948156 | 148949146 |
| chr1 | 149177990 | 149179355 |
| chr1 | 149690184 | 149691148 |
| chr1 | 149691149 | 149692634 |
| chr1 | 149757920 | 149758869 |
| chr1 | 149811166 | 149812051 |
| chr1 | 149817995 | 149819309 |
| chr1 | 150350612 | 150353049 |
| chr1 | 150353050 | 150354921 |
| chr1 | 150456193 | 150456767 |
| chr1 | 150708226 | 150709407 |
| chr1 | 150982226 | 150982872 |
| chr1 | 151203434 | 151204746 |
| chr1 | 151722663 | 151723237 |
| chr1 | 151823639 | 151824670 |
| chr1 | 151909698 | 151911915 |
| chr1 | 151911916 | 151913353 |
| chr1 | 151914896 | 151915957 |
| chr1 | 151920843 | 151921417 |
| chr1 | 152009835 | 152010409 |

|      |           |           |
|------|-----------|-----------|
| chr1 | 152027009 | 152028062 |
| chr1 | 152889293 | 152889901 |
| chr1 | 153487643 | 153488296 |
| chr1 | 153534688 | 153535446 |
| chr1 | 156706377 | 156706951 |
| chr1 | 156706952 | 156708918 |
| chr1 | 157803732 | 157804934 |
| chr1 | 157804935 | 157805683 |
| chr1 | 157915150 | 157916557 |
| chr1 | 159262077 | 159262890 |
| chr1 | 159262891 | 159263260 |
| chr1 | 162332498 | 162333403 |
| chr1 | 163576964 | 163577690 |
| chr1 | 164363636 | 164364569 |
| chr1 | 164490538 | 164491284 |
| chr1 | 164924462 | 164925273 |
| chr1 | 166068460 | 166069600 |
| chr1 | 166186821 | 166187714 |
| chr1 | 166594539 | 166595113 |
| chr1 | 169232423 | 169233033 |
| chr1 | 169752982 | 169754320 |
| chr1 | 170176337 | 170177184 |
| chr1 | 170177809 | 170178383 |
| chr1 | 171500055 | 171500629 |
| chr1 | 171893176 | 171894006 |
| chr1 | 171896384 | 171897215 |
| chr1 | 171898080 | 171898959 |
| chr1 | 174793941 | 174794705 |
| chr1 | 174795788 | 174796801 |
| chr1 | 175041739 | 175042842 |
| chr1 | 175237320 | 175238516 |
| chr1 | 175782421 | 175782995 |
| chr1 | 175841819 | 175843410 |
| chr1 | 175843525 | 175844717 |
| chr1 | 175934969 | 175935886 |
| chr1 | 175995530 | 175996104 |
| chr1 | 176583427 | 176584001 |
| chr1 | 176654903 | 176655693 |
| chr1 | 176852198 | 176852772 |
| chr1 | 177722519 | 177723299 |



|      |           |           |
|------|-----------|-----------|
| chr1 | 177789361 | 177790145 |
| chr1 | 179663148 | 179663984 |
| chr1 | 179722639 | 179723908 |
| chr1 | 179886153 | 179887503 |
| chr1 | 180168661 | 180169235 |
| chr1 | 180170806 | 180171881 |
| chr1 | 181088951 | 181089525 |
| chr1 | 182017593 | 182019375 |
| chr1 | 189759997 | 189760571 |
| chr1 | 189805280 | 189805854 |
| chr1 | 193468672 | 193469246 |
| chr1 | 194476281 | 194477031 |
| chr1 | 197115684 | 197116258 |
| chr1 | 197870639 | 197872106 |
| chr1 | 197983813 | 197984413 |
| chr1 | 198098024 | 198098938 |
| chr1 | 199049707 | 199050352 |
| chr1 | 199508997 | 199509774 |
| chr1 | 199665513 | 199666671 |
| chr1 | 200003787 | 200004875 |
| chr1 | 200007143 | 200007751 |
| chr1 | 200561250 | 200562079 |
| chr1 | 200872020 | 200873078 |
| chr1 | 201117669 | 201119227 |
| chr1 | 201194062 | 201195216 |
| chr1 | 201822424 | 201823542 |
| chr1 | 202200732 | 202201641 |
| chr1 | 202332081 | 202332655 |
| chr1 | 202450494 | 202451654 |
| chr1 | 203065780 | 203066449 |
| chr1 | 203456724 | 203458081 |
| chr1 | 203466797 | 203467840 |
| chr1 | 203593086 | 203594098 |
| chr1 | 203612622 | 203613972 |
| chr1 | 203614155 | 203615336 |
| chr1 | 203877875 | 203878722 |
| chr1 | 203882574 | 203883924 |
| chr1 | 204780623 | 204782224 |
| chr1 | 204782243 | 204783338 |
| chr1 | 205791013 | 205791658 |

|      |           |           |
|------|-----------|-----------|
| chr1 | 206149191 | 206150194 |
| chr1 | 206210749 | 206211323 |
| chr1 | 206213546 | 206215127 |
| chr1 | 206215493 | 206216067 |
| chr1 | 206216854 | 206218344 |
| chr1 | 206218492 | 206220228 |
| chr1 | 206369623 | 206370451 |
| chr1 | 206370901 | 206372172 |
| chr1 | 206384413 | 206386404 |
| chr1 | 206386933 | 206388457 |
| chr1 | 206794063 | 206794976 |
| chr1 | 208592054 | 208592628 |
| chr1 | 208596569 | 208597435 |
| chr1 | 208846356 | 208847110 |
| chr1 | 208848184 | 208848787 |
| chr1 | 209167000 | 209167693 |
| chr1 | 209169459 | 209171097 |
| chr1 | 210843055 | 210843629 |
| chr1 | 211119493 | 211120526 |
| chr1 | 212129288 | 212129893 |
| chr1 | 214846501 | 214847075 |
| chr1 | 214909574 | 214910200 |
| chr1 | 218303655 | 218304685 |
| chr1 | 219273634 | 219274277 |
| chr1 | 220201254 | 220202608 |
| chr1 | 220397451 | 220398025 |
| chr1 | 220486549 | 220487328 |
| chr1 | 222146342 | 222146940 |
| chr1 | 222149415 | 222150630 |
| chr1 | 222902054 | 222902819 |
| chr1 | 224440174 | 224441241 |
| chr1 | 224633931 | 224634772 |
| chr1 | 225089515 | 225090651 |
| chr1 | 225710625 | 225711582 |
| chr1 | 226067395 | 226068124 |
| chr1 | 227863212 | 227863849 |
| chr1 | 230057813 | 230058836 |
| chr1 | 231049964 | 231050996 |
| chr1 | 231052834 | 231053642 |
| chr1 | 231053643 | 231056018 |

|      |           |           |
|------|-----------|-----------|
| chr1 | 231992637 | 231993464 |
| chr1 | 233001761 | 233002508 |
| chr1 | 233013539 | 233014186 |
| chr1 | 233095254 | 233095828 |
| chr1 | 238126530 | 238127104 |
| chr1 | 240842773 | 240843920 |
| chr1 | 241352187 | 241352761 |
| chr2 | 5496      | 6528      |
| chr2 | 9095042   | 9095805   |
| chr2 | 9722031   | 9722692   |
| chr2 | 11623035  | 11623820  |
| chr2 | 11624374  | 11624948  |
| chr2 | 17641974  | 17642548  |
| chr2 | 20352551  | 20353421  |
| chr2 | 24149867  | 24150441  |
| chr2 | 24499549  | 24500156  |
| chr2 | 24837214  | 24837822  |
| chr2 | 25511255  | 25512198  |
| chr2 | 25808086  | 25808700  |
| chr2 | 27762515  | 27763913  |
| chr2 | 27900114  | 27901148  |
| chr2 | 28018795  | 28019741  |
| chr2 | 28020581  | 28021371  |
| chr2 | 28525269  | 28525954  |
| chr2 | 28527097  | 28527824  |
| chr2 | 28678991  | 28679945  |
| chr2 | 29258013  | 29258733  |
| chr2 | 31548925  | 31549640  |
| chr2 | 36496055  | 36496667  |
| chr2 | 37105620  | 37106303  |
| chr2 | 37814821  | 37815812  |
| chr2 | 38889277  | 38890458  |
| chr2 | 40573231  | 40574231  |
| chr2 | 42633578  | 42634232  |
| chr2 | 43596473  | 43597373  |
| chr2 | 43598101  | 43598819  |
| chr2 | 43773246  | 43774005  |
| chr2 | 47052664  | 47053541  |
| chr2 | 47080330  | 47080904  |
| chr2 | 47080905  | 47081280  |

|      |           |           |
|------|-----------|-----------|
| chr2 | 47314804  | 47316297  |
| chr2 | 48482493  | 48483475  |
| chr2 | 54695971  | 54696694  |
| chr2 | 55189157  | 55190680  |
| chr2 | 55558118  | 55559005  |
| chr2 | 61153384  | 61154315  |
| chr2 | 61155259  | 61156763  |
| chr2 | 64349424  | 64350508  |
| chr2 | 64586908  | 64587518  |
| chr2 | 64790960  | 64791902  |
| chr2 | 65574907  | 65575779  |
| chr2 | 69110250  | 69111065  |
| chr2 | 69917634  | 69918853  |
| chr2 | 70221928  | 70222502  |
| chr2 | 70223606  | 70224587  |
| chr2 | 70224939  | 70226120  |
| chr2 | 70691083  | 70691946  |
| chr2 | 72286537  | 72287369  |
| chr2 | 72287370  | 72288067  |
| chr2 | 86032139  | 86033135  |
| chr2 | 86579096  | 86580297  |
| chr2 | 86762504  | 86763141  |
| chr2 | 87592515  | 87595726  |
| chr2 | 87596036  | 87596962  |
| chr2 | 89944771  | 89945345  |
| chr2 | 91099946  | 91101469  |
| chr2 | 91427433  | 91428325  |
| chr2 | 91644230  | 91645111  |
| chr2 | 95980256  | 95981018  |
| chr2 | 95981808  | 95982564  |
| chr2 | 95984291  | 95984869  |
| chr2 | 95985914  | 95986630  |
| chr2 | 95995523  | 95996101  |
| chr2 | 95997093  | 95997896  |
| chr2 | 96001129  | 96001707  |
| chr2 | 96347830  | 96348796  |
| chr2 | 96622128  | 96622702  |
| chr2 | 97625037  | 97625775  |
| chr2 | 99563729  | 99564303  |
| chr2 | 101463418 | 101463992 |

|      |           |           |
|------|-----------|-----------|
| chr2 | 102076068 | 102077438 |
| chr2 | 102411170 | 102411959 |
| chr2 | 105471278 | 105472371 |
| chr2 | 105478148 | 105480145 |
| chr2 | 106540661 | 106541355 |
| chr2 | 106964254 | 106965138 |
| chr2 | 108608468 | 108609260 |
| chr2 | 108794064 | 108794674 |
| chr2 | 109062978 | 109064320 |
| chr2 | 109909056 | 109910240 |
| chr2 | 110102868 | 110103525 |
| chr2 | 110575106 | 110575763 |
| chr2 | 110768510 | 110769390 |
| chr2 | 110769391 | 110770033 |
| chr2 | 111049839 | 111050719 |
| chr2 | 111050720 | 111051299 |
| chr2 | 111591356 | 111592530 |
| chr2 | 111594461 | 111595035 |
| chr2 | 111596512 | 111597396 |
| chr2 | 111696879 | 111697924 |
| chr2 | 111697925 | 111698645 |
| chr2 | 111966145 | 111967043 |
| chr2 | 111967287 | 111970575 |
| chr2 | 111970576 | 111971379 |
| chr2 | 112448448 | 112449827 |
| chr2 | 112529771 | 112530785 |
| chr2 | 112906886 | 112907760 |
| chr2 | 112955111 | 112955762 |
| chr2 | 113117807 | 113119610 |
| chr2 | 113257830 | 113258477 |
| chr2 | 113542258 | 113544033 |
| chr2 | 113546052 | 113547242 |
| chr2 | 113588217 | 113588791 |
| chr2 | 113911300 | 113912111 |
| chr2 | 114057599 | 114058173 |
| chr2 | 114097063 | 114098134 |
| chr2 | 114124134 | 114125110 |
| chr2 | 114125111 | 114127025 |
| chr2 | 114127026 | 114127713 |
| chr2 | 118559050 | 118560037 |

|      |           |           |
|------|-----------|-----------|
| chr2 | 121265493 | 121266306 |
| chr2 | 127691322 | 127692655 |
| chr2 | 127699803 | 127701178 |
| chr2 | 127981888 | 127983084 |
| chr2 | 128000228 | 128000903 |
| chr2 | 130655259 | 130656046 |
| chr2 | 133007250 | 133008495 |
| chr2 | 133261327 | 133262037 |
| chr2 | 133262038 | 133262810 |
| chr2 | 133262811 | 133263607 |
| chr2 | 143464525 | 143465208 |
| chr2 | 143465378 | 143466301 |
| chr2 | 152857150 | 152857724 |
| chr2 | 152857725 | 152858390 |
| chr2 | 157119635 | 157120602 |
| chr2 | 158558118 | 158558917 |
| chr2 | 159838858 | 159840106 |
| chr2 | 160394159 | 160394810 |
| chr2 | 160887080 | 160888508 |
| chr2 | 161989784 | 161990854 |
| chr2 | 162926074 | 162927287 |
| chr2 | 165521821 | 165523078 |
| chr2 | 165525028 | 165525602 |
| chr2 | 169719947 | 169721043 |
| chr2 | 170333395 | 170334005 |
| chr2 | 171499455 | 171500546 |
| chr2 | 172575438 | 172576012 |
| chr2 | 176794074 | 176795163 |
| chr2 | 176797051 | 176797664 |
| chr2 | 178082957 | 178084020 |
| chr2 | 178086365 | 178087425 |
| chr2 | 178087426 | 178088224 |
| chr2 | 178088225 | 178088805 |
| chr2 | 179958189 | 179959133 |
| chr2 | 186484257 | 186484974 |
| chr2 | 187280616 | 187282446 |
| chr2 | 191009801 | 191010433 |
| chr2 | 191340143 | 191340828 |
| chr2 | 191572126 | 191572738 |
| chr2 | 198205530 | 198206444 |

|      |           |           |
|------|-----------|-----------|
| chr2 | 200990585 | 200991589 |
| chr2 | 200992193 | 200992792 |
| chr2 | 201808677 | 201809326 |
| chr2 | 203065130 | 203065880 |
| chr2 | 203065881 | 203066595 |
| chr2 | 204225561 | 204226396 |
| chr2 | 207853389 | 207854845 |
| chr2 | 208220093 | 208220801 |
| chr2 | 208221573 | 208222147 |
| chr2 | 218976772 | 218977861 |
| chr2 | 219907721 | 219908809 |
| chr2 | 219963509 | 219965503 |
| chr2 | 219968886 | 219969705 |
| chr2 | 220374938 | 220375587 |
| chr2 | 227526572 | 227527146 |
| chr2 | 232397434 | 232398045 |
| chr2 | 233075571 | 233076513 |
| chr2 | 233716232 | 233717111 |
| chr2 | 233937725 | 233938982 |
| chr2 | 234041291 | 234041964 |
| chr2 | 234380709 | 234381739 |
| chr2 | 234381925 | 234382541 |
| chr2 | 237775782 | 237776943 |
| chr2 | 241092951 | 241093912 |
| chr2 | 241218933 | 241219893 |
| chr2 | 241224756 | 241225916 |
| chr2 | 241239389 | 241240000 |
| chr2 | 241552875 | 241553588 |
| chr2 | 241557445 | 241558424 |
| chr3 | 4996640   | 4997329   |
| chr3 | 8674866   | 8675786   |
| chr3 | 8981316   | 8981890   |
| chr3 | 9900789   | 9901764   |
| chr3 | 15814887  | 15815706  |
| chr3 | 25440210  | 25440858  |
| chr3 | 25440859  | 25441719  |
| chr3 | 25679903  | 25680560  |
| chr3 | 29299106  | 29299720  |
| chr3 | 39167312  | 39168139  |
| chr3 | 39168302  | 39169763  |

|      |           |           |
|------|-----------|-----------|
| chr3 | 40326000  | 40326574  |
| chr3 | 41216676  | 41217250  |
| chr3 | 42107507  | 42108356  |
| chr3 | 44982720  | 44983695  |
| chr3 | 45240148  | 45241101  |
| chr3 | 48324496  | 48325169  |
| chr3 | 48607444  | 48608901  |
| chr3 | 48610403  | 48612016  |
| chr3 | 52062569  | 52063265  |
| chr3 | 57069287  | 57070028  |
| chr3 | 65971356  | 65972078  |
| chr3 | 69893668  | 69894772  |
| chr3 | 71195362  | 71195971  |
| chr3 | 71198564  | 71199181  |
| chr3 | 75565938  | 75566796  |
| chr3 | 75566848  | 75567851  |
| chr3 | 90338982  | 90339873  |
| chr3 | 95264291  | 95264901  |
| chr3 | 99797514  | 99798122  |
| chr3 | 101533193 | 101533767 |
| chr3 | 102887782 | 102888765 |
| chr3 | 102888766 | 102889328 |
| chr3 | 106566570 | 106567178 |
| chr3 | 106567179 | 106567515 |
| chr3 | 106567516 | 106568242 |
| chr3 | 106569062 | 106570044 |
| chr3 | 106570055 | 106570730 |
| chr3 | 112795227 | 112796499 |
| chr3 | 112796500 | 112797169 |
| chr3 | 112875465 | 112876844 |
| chr3 | 112877146 | 112878907 |
| chr3 | 113060102 | 113061147 |
| chr3 | 113061309 | 113062502 |
| chr3 | 113287563 | 113288513 |
| chr3 | 114947618 | 114948192 |
| chr3 | 115258112 | 115258797 |
| chr3 | 120382881 | 120384173 |
| chr3 | 120384174 | 120384611 |
| chr3 | 120386019 | 120387081 |
| chr3 | 123715169 | 123716148 |



|      |           |           |
|------|-----------|-----------|
| chr3 | 123811484 | 123812387 |
| chr3 | 123995260 | 123996619 |
| chr3 | 124824504 | 124825114 |
| chr3 | 125035858 | 125036901 |
| chr3 | 125162309 | 125162883 |
| chr3 | 126309413 | 126310041 |
| chr3 | 126311291 | 126313495 |
| chr3 | 126317866 | 126318662 |
| chr3 | 127117364 | 127118232 |
| chr3 | 127118420 | 127119129 |
| chr3 | 128792854 | 128793428 |
| chr3 | 129688932 | 129689532 |
| chr3 | 130080353 | 130081146 |
| chr3 | 130362735 | 130363309 |
| chr3 | 130641012 | 130642083 |
| chr3 | 131311697 | 131312736 |
| chr3 | 132094613 | 132095225 |
| chr3 | 133518689 | 133519725 |
| chr3 | 133831258 | 133831832 |
| chr3 | 134769492 | 134771056 |
| chr3 | 134771300 | 134772195 |
| chr3 | 134774489 | 134775164 |
| chr3 | 134776086 | 134776660 |
| chr3 | 135452298 | 135453084 |
| chr3 | 135558989 | 135559958 |
| chr3 | 135565574 | 135566328 |
| chr3 | 135575175 | 135575820 |
| chr3 | 135575821 | 135576114 |
| chr3 | 135576115 | 135577033 |
| chr3 | 138157277 | 138157851 |
| chr3 | 142686975 | 142688327 |
| chr3 | 142688969 | 142689543 |
| chr3 | 143076898 | 143077828 |
| chr3 | 144088489 | 144089099 |
| chr3 | 144097546 | 144098436 |
| chr3 | 144202382 | 144203543 |
| chr3 | 147360423 | 147361448 |
| chr3 | 147703343 | 147704022 |
| chr3 | 150540075 | 150540867 |
| chr3 | 150577921 | 150578752 |

|      |           |           |
|------|-----------|-----------|
| chr3 | 150858035 | 150859119 |
| chr3 | 151608374 | 151609106 |
| chr3 | 151963895 | 151964689 |
| chr3 | 152481790 | 152482476 |
| chr3 | 152516743 | 152517649 |
| chr3 | 152518902 | 152520164 |
| chr3 | 153467116 | 153467690 |
| chr3 | 153469353 | 153470056 |
| chr3 | 154359180 | 154360066 |
| chr3 | 154360489 | 154362835 |
| chr3 | 154363106 | 154364032 |
| chr3 | 157054864 | 157055539 |
| chr3 | 157055540 | 157055887 |
| chr3 | 157873929 | 157875028 |
| chr3 | 157876165 | 157876996 |
| chr3 | 158011295 | 158013975 |
| chr3 | 158017130 | 158018665 |
| chr3 | 158026244 | 158026965 |
| chr3 | 158026966 | 158027855 |
| chr3 | 161766158 | 161767321 |
| chr3 | 161877121 | 161878095 |
| chr3 | 162421336 | 162421937 |
| chr3 | 168012843 | 168013417 |
| chr3 | 169295330 | 169296197 |
| chr3 | 169296412 | 169297415 |
| chr3 | 171556296 | 171557520 |
| chr3 | 171557593 | 171558749 |
| chr3 | 171558750 | 171559847 |
| chr3 | 173009682 | 173010447 |
| chr3 | 173010448 | 173010803 |
| chr3 | 173011289 | 173012729 |
| chr3 | 173045301 | 173045912 |
| chr3 | 173911255 | 173912046 |
| chr3 | 178395919 | 178396493 |
| chr3 | 178397636 | 178398313 |
| chr3 | 178398443 | 178399119 |
| chr3 | 183809923 | 183810674 |
| chr3 | 184465948 | 184467258 |
| chr3 | 185449517 | 185450091 |
| chr3 | 186758780 | 186759897 |

|      |           |           |
|------|-----------|-----------|
| chr3 | 186775545 | 186776119 |
| chr3 | 187021536 | 187022142 |
| chr3 | 187141248 | 187142063 |
| chr3 | 187983294 | 187984370 |
| chr3 | 191520499 | 191521227 |
| chr3 | 191523021 | 191523705 |
| chr3 | 192531987 | 192532561 |
| chr3 | 194116601 | 194117175 |
| chr3 | 195336021 | 195337111 |
| chr3 | 195337700 | 195338495 |
| chr3 | 196874545 | 196875208 |
| chr3 | 197111617 | 197112191 |
| chr3 | 197122270 | 197123024 |
| chr3 | 197204193 | 197205000 |
| chr3 | 197351138 | 197351923 |
| chr3 | 197357169 | 197358883 |
| chr3 | 197553263 | 197554109 |
| chr3 | 197557900 | 197558776 |
| chr3 | 197717535 | 197718844 |
| chr3 | 198246306 | 198248063 |
| chr3 | 198841742 | 198842620 |
| chr3 | 199389881 | 199391149 |
| chr4 | 15885     | 16935     |
| chr4 | 1094868   | 1095442   |
| chr4 | 1160753   | 1161578   |
| chr4 | 3424493   | 3425597   |
| chr4 | 4074250   | 4075001   |
| chr4 | 4075108   | 4075866   |
| chr4 | 6787990   | 6788817   |
| chr4 | 6808423   | 6809479   |
| chr4 | 25996646  | 25997688  |
| chr4 | 38490990  | 38491865  |
| chr4 | 40177056  | 40177741  |
| chr4 | 40179387  | 40179961  |
| chr4 | 40472640  | 40473469  |
| chr4 | 41381631  | 41382836  |
| chr4 | 48823055  | 48823652  |
| chr4 | 49344109  | 49344962  |
| chr4 | 54698593  | 54699560  |
| chr4 | 68579916  | 68581414  |

|      |           |           |
|------|-----------|-----------|
| chr4 | 69532386  | 69533317  |
| chr4 | 71562139  | 71563022  |
| chr4 | 75063091  | 75063943  |
| chr4 | 75236039  | 75236680  |
| chr4 | 75594372  | 75594946  |
| chr4 | 79830460  | 79831354  |
| chr4 | 80055037  | 80055611  |
| chr4 | 81348096  | 81349127  |
| chr4 | 81355512  | 81356528  |
| chr4 | 84180521  | 84181095  |
| chr4 | 84562076  | 84563000  |
| chr4 | 84813966  | 84814540  |
| chr4 | 85969067  | 85970531  |
| chr4 | 88169632  | 88170571  |
| chr4 | 99939722  | 99940508  |
| chr4 | 100207909 | 100209350 |
| chr4 | 101093585 | 101094525 |
| chr4 | 102627652 | 102628620 |
| chr4 | 103780371 | 103780945 |
| chr4 | 110839231 | 110840126 |
| chr4 | 119707626 | 119708200 |
| chr4 | 122969094 | 122970259 |
| chr4 | 125716232 | 125717330 |
| chr4 | 126668401 | 126669045 |
| chr4 | 129061740 | 129062539 |
| chr4 | 140293144 | 140294296 |
| chr4 | 140294551 | 140295125 |
| chr4 | 143758976 | 143759624 |
| chr4 | 146786204 | 146786881 |
| chr4 | 153959259 | 153960390 |
| chr4 | 154431249 | 154432331 |
| chr4 | 170565586 | 170566236 |
| chr4 | 170914983 | 170915629 |
| chr4 | 177566577 | 177567767 |
| chr4 | 188022277 | 188023197 |
| chr4 | 188024912 | 188025959 |
| chr4 | 189403884 | 189404530 |
| chr4 | 191392615 | 191393503 |
| chr5 | 1937138   | 1937893   |
| chr5 | 2810724   | 2811793   |

|      |          |          |
|------|----------|----------|
| chr5 | 13997334 | 13998671 |
| chr5 | 16988174 | 16988822 |
| chr5 | 21372070 | 21373285 |
| chr5 | 21375726 | 21376586 |
| chr5 | 34281708 | 34282531 |
| chr5 | 34284715 | 34285942 |
| chr5 | 34951129 | 34952024 |
| chr5 | 35893492 | 35894102 |
| chr5 | 36642114 | 36643135 |
| chr5 | 38637121 | 38638578 |
| chr5 | 39255349 | 39255923 |
| chr5 | 43075897 | 43076631 |
| chr5 | 43078254 | 43079245 |
| chr5 | 43100695 | 43101720 |
| chr5 | 49997026 | 49998024 |
| chr5 | 49998285 | 49999226 |
| chr5 | 49999227 | 50000556 |
| chr5 | 50011362 | 50012002 |
| chr5 | 50012760 | 50013370 |
| chr5 | 52314983 | 52316180 |
| chr5 | 52316484 | 52317632 |
| chr5 | 52318677 | 52320726 |
| chr5 | 52810567 | 52811851 |
| chr5 | 55454796 | 55456150 |
| chr5 | 56813730 | 56814972 |
| chr5 | 58695229 | 58696230 |
| chr5 | 59099547 | 59100443 |
| chr5 | 59100444 | 59100961 |
| chr5 | 59104787 | 59105468 |
| chr5 | 64097309 | 64098386 |
| chr5 | 64100177 | 64100751 |
| chr5 | 64529631 | 64530306 |
| chr5 | 64530307 | 64531282 |
| chr5 | 66335759 | 66336677 |
| chr5 | 68891624 | 68892346 |
| chr5 | 69043247 | 69044113 |
| chr5 | 69046244 | 69047541 |
| chr5 | 69170858 | 69172267 |
| chr5 | 69174286 | 69175157 |
| chr5 | 69622979 | 69623812 |

|      |           |           |
|------|-----------|-----------|
| chr5 | 69625922  | 69627265  |
| chr5 | 69727585  | 69728994  |
| chr5 | 69731044  | 69731884  |
| chr5 | 69918515  | 69919351  |
| chr5 | 69921399  | 69922808  |
| chr5 | 70045982  | 70047279  |
| chr5 | 70049408  | 70050270  |
| chr5 | 70398691  | 70399348  |
| chr5 | 70622485  | 70623326  |
| chr5 | 70625459  | 70626783  |
| chr5 | 71510804  | 71511523  |
| chr5 | 71565460  | 71566560  |
| chr5 | 72179450  | 72180472  |
| chr5 | 72286898  | 72287966  |
| chr5 | 73969628  | 73970202  |
| chr5 | 73972654  | 73975640  |
| chr5 | 74323910  | 74324954  |
| chr5 | 74368573  | 74369390  |
| chr5 | 75703868  | 75704904  |
| chr5 | 76145306  | 76146379  |
| chr5 | 76149852  | 76150680  |
| chr5 | 76361396  | 76362228  |
| chr5 | 78316220  | 78316794  |
| chr5 | 78835674  | 78836293  |
| chr5 | 83713293  | 83714866  |
| chr5 | 90611360  | 90613618  |
| chr5 | 95089443  | 95090017  |
| chr5 | 95323169  | 95323917  |
| chr5 | 96063851  | 96065239  |
| chr5 | 96296020  | 96297100  |
| chr5 | 98292788  | 98293842  |
| chr5 | 102483533 | 102484142 |
| chr5 | 107035951 | 107036644 |
| chr5 | 110875922 | 110876819 |
| chr5 | 111775856 | 111776679 |
| chr5 | 112285370 | 112285944 |
| chr5 | 115204911 | 115205706 |
| chr5 | 118719044 | 118719774 |
| chr5 | 120976793 | 120977398 |
| chr5 | 122875231 | 122875916 |

|      |           |           |
|------|-----------|-----------|
| chr5 | 124105851 | 124107180 |
| chr5 | 124630542 | 124631165 |
| chr5 | 127061607 | 127062181 |
| chr5 | 135391416 | 135392359 |
| chr5 | 138652515 | 138653123 |
| chr5 | 138807468 | 138808142 |
| chr5 | 139002603 | 139003609 |
| chr5 | 139704085 | 139704888 |
| chr5 | 139707655 | 139709327 |
| chr5 | 140695145 | 140695719 |
| chr5 | 141230006 | 141231377 |
| chr5 | 141469451 | 141470025 |
| chr5 | 141957532 | 141958472 |
| chr5 | 142045680 | 142046636 |
| chr5 | 145296078 | 145296992 |
| chr5 | 147194540 | 147195921 |
| chr5 | 148493642 | 148494987 |
| chr5 | 148495004 | 148495898 |
| chr5 | 148978268 | 148979533 |
| chr5 | 149877314 | 149878117 |
| chr5 | 149999998 | 150000940 |
| chr5 | 150133563 | 150134586 |
| chr5 | 150932191 | 150933051 |
| chr5 | 151130988 | 151131603 |
| chr5 | 156750004 | 156750838 |
| chr5 | 156935493 | 156936240 |
| chr5 | 159271709 | 159272449 |
| chr5 | 159272450 | 159273281 |
| chr5 | 159277613 | 159278223 |
| chr5 | 167647706 | 167648552 |
| chr5 | 169054898 | 169056563 |
| chr5 | 171546162 | 171547279 |
| chr5 | 172136924 | 172137819 |
| chr5 | 172137820 | 172138433 |
| chr5 | 175807434 | 175808075 |
| chr5 | 177989885 | 177990687 |
| chr5 | 178146013 | 178147341 |
| chr5 | 178982137 | 178982909 |
| chr5 | 180474232 | 180475371 |
| chr5 | 180780336 | 180781018 |

|      |          |          |
|------|----------|----------|
| chr6 | 1258246  | 1258820  |
| chr6 | 1554843  | 1555626  |
| chr6 | 2784379  | 2785044  |
| chr6 | 2931497  | 2932531  |
| chr6 | 2933313  | 2934404  |
| chr6 | 3105173  | 3106043  |
| chr6 | 3787891  | 3788465  |
| chr6 | 4754423  | 4755223  |
| chr6 | 4755224  | 4756000  |
| chr6 | 7485920  | 7487031  |
| chr6 | 10520886 | 10521604 |
| chr6 | 10548931 | 10550149 |
| chr6 | 12395700 | 12396682 |
| chr6 | 12396873 | 12399223 |
| chr6 | 15354164 | 15354856 |
| chr6 | 16869999 | 16871665 |
| chr6 | 16873791 | 16875056 |
| chr6 | 17502102 | 17502827 |
| chr6 | 18101142 | 18102015 |
| chr6 | 18495464 | 18496110 |
| chr6 | 20319345 | 20320225 |
| chr6 | 25328050 | 25328624 |
| chr6 | 26163011 | 26163695 |
| chr6 | 26232161 | 26233152 |
| chr6 | 26291711 | 26292285 |
| chr6 | 26296924 | 26297498 |
| chr6 | 26301210 | 26301784 |
| chr6 | 26305006 | 26306069 |
| chr6 | 26307420 | 26308066 |
| chr6 | 26312498 | 26313574 |
| chr6 | 26324818 | 26325540 |
| chr6 | 26380834 | 26381408 |
| chr6 | 26393033 | 26393967 |
| chr6 | 27033379 | 27034215 |
| chr6 | 27036423 | 27037657 |
| chr6 | 27208197 | 27209572 |
| chr6 | 27222733 | 27223342 |
| chr6 | 27883330 | 27884670 |
| chr6 | 27889803 | 27890802 |
| chr6 | 27899514 | 27900351 |



|      |          |          |
|------|----------|----------|
| chr6 | 27906520 | 27907816 |
| chr6 | 27940839 | 27941485 |
| chr6 | 28156738 | 28157386 |
| chr6 | 30293186 | 30293760 |
| chr6 | 30646855 | 30647541 |
| chr6 | 30792507 | 30794006 |
| chr6 | 30818466 | 30819252 |
| chr6 | 30820148 | 30820834 |
| chr6 | 30823660 | 30824783 |
| chr6 | 30824784 | 30826083 |
| chr6 | 30827192 | 30828064 |
| chr6 | 32228509 | 32229375 |
| chr6 | 33046490 | 33047511 |
| chr6 | 33280732 | 33281776 |
| chr6 | 34820896 | 34821612 |
| chr6 | 34821613 | 34822053 |
| chr6 | 36669582 | 36670337 |
| chr6 | 36755599 | 36756777 |
| chr6 | 36758044 | 36759132 |
| chr6 | 36831379 | 36832191 |
| chr6 | 36988029 | 36989207 |
| chr6 | 37081413 | 37082244 |
| chr6 | 37244815 | 37245888 |
| chr6 | 37247457 | 37248518 |
| chr6 | 41712117 | 41712976 |
| chr6 | 41712977 | 41713956 |
| chr6 | 42299970 | 42301016 |
| chr6 | 42302208 | 42303443 |
| chr6 | 43134669 | 43136020 |
| chr6 | 44322520 | 44323094 |
| chr6 | 47118476 | 47119156 |
| chr6 | 47119724 | 47120409 |
| chr6 | 47731572 | 47732243 |
| chr6 | 50988368 | 50989044 |
| chr6 | 56615282 | 56616364 |
| chr6 | 56926765 | 56927714 |
| chr6 | 64339269 | 64340253 |
| chr6 | 64341301 | 64342174 |
| chr6 | 72185640 | 72186214 |
| chr6 | 74461098 | 74462944 |

|      |           |           |
|------|-----------|-----------|
| chr6 | 75972055  | 75973071  |
| chr6 | 79844822  | 79845396  |
| chr6 | 80836512  | 80837193  |
| chr6 | 84793879  | 84794831  |
| chr6 | 86216255  | 86217118  |
| chr6 | 88466929  | 88467820  |
| chr6 | 90064013  | 90064661  |
| chr6 | 108986526 | 108987247 |
| chr6 | 108989730 | 108990335 |
| chr6 | 111854514 | 111855088 |
| chr6 | 112033265 | 112033908 |
| chr6 | 116488034 | 116489329 |
| chr6 | 116799271 | 116800260 |
| chr6 | 116998771 | 116999345 |
| chr6 | 119257289 | 119257863 |
| chr6 | 119509882 | 119510628 |
| chr6 | 123005040 | 123006129 |
| chr6 | 126174969 | 126176036 |
| chr6 | 127629030 | 127629604 |
| chr6 | 128270568 | 128271179 |
| chr6 | 128883451 | 128884585 |
| chr6 | 132313817 | 132314837 |
| chr6 | 133011103 | 133011893 |
| chr6 | 137579665 | 137580562 |
| chr6 | 137580785 | 137581756 |
| chr6 | 138467944 | 138468625 |
| chr6 | 138469830 | 138470885 |
| chr6 | 139180235 | 139181402 |
| chr6 | 142663400 | 142664303 |
| chr6 | 144646996 | 144647997 |
| chr6 | 144649948 | 144650627 |
| chr6 | 149109118 | 149109981 |
| chr6 | 150276017 | 150276731 |
| chr6 | 150482060 | 150482634 |
| chr6 | 151295379 | 151296098 |
| chr6 | 151449000 | 151451029 |
| chr6 | 151864942 | 151865690 |
| chr6 | 155539891 | 155541277 |
| chr6 | 157190072 | 157191069 |
| chr6 | 160647531 | 160648530 |

|      |           |           |
|------|-----------|-----------|
| chr6 | 161387617 | 161388332 |
| chr6 | 163120642 | 163121216 |
| chr6 | 163804208 | 163805097 |
| chr6 | 165958224 | 165959411 |
| chr6 | 167587300 | 167588522 |
| chr6 | 167703312 | 167705243 |
| chr6 | 168049438 | 168050378 |
| chr6 | 170923001 | 170923683 |
| chr7 | 107683    | 108945    |
| chr7 | 644209    | 646446    |
| chr7 | 688735    | 689689    |
| chr7 | 1271641   | 1272645   |
| chr7 | 1344745   | 1346199   |
| chr7 | 1346402   | 1347509   |
| chr7 | 1349752   | 1350557   |
| chr7 | 1379838   | 1380742   |
| chr7 | 3113891   | 3114465   |
| chr7 | 4496605   | 4497829   |
| chr7 | 5239894   | 5241171   |
| chr7 | 5241981   | 5243350   |
| chr7 | 5326612   | 5327484   |
| chr7 | 5368280   | 5369383   |
| chr7 | 5369384   | 5370058   |
| chr7 | 5375001   | 5376156   |
| chr7 | 7376884   | 7378024   |
| chr7 | 7378678   | 7379874   |
| chr7 | 7453195   | 7453805   |
| chr7 | 7724138   | 7725020   |
| chr7 | 12498916  | 12499836  |
| chr7 | 16616775  | 16617349  |
| chr7 | 17112312  | 17113157  |
| chr7 | 20027727  | 20028734  |
| chr7 | 20029792  | 20030799  |
| chr7 | 20143079  | 20143825  |
| chr7 | 20144641  | 20145215  |
| chr7 | 21757120  | 21757771  |
| chr7 | 22539189  | 22540279  |
| chr7 | 22543826  | 22544882  |
| chr7 | 22833610  | 22834286  |
| chr7 | 22994357  | 22995328  |

|      |          |          |
|------|----------|----------|
| chr7 | 23059168 | 23060094 |
| chr7 | 24568420 | 24569304 |
| chr7 | 24710931 | 24711906 |
| chr7 | 24794051 | 24795141 |
| chr7 | 26013404 | 26014640 |
| chr7 | 26676884 | 26677500 |
| chr7 | 26677501 | 26677879 |
| chr7 | 26731058 | 26731739 |
| chr7 | 26915003 | 26915577 |
| chr7 | 26948480 | 26949473 |
| chr7 | 26963479 | 26964533 |
| chr7 | 26967549 | 26968712 |
| chr7 | 26968765 | 26969790 |
| chr7 | 26977413 | 26979147 |
| chr7 | 26980982 | 26981556 |
| chr7 | 26981569 | 26983125 |
| chr7 | 26983126 | 26984252 |
| chr7 | 26984253 | 26985379 |
| chr7 | 26985976 | 26987059 |
| chr7 | 26997372 | 26998181 |
| chr7 | 27552003 | 27552613 |
| chr7 | 27552614 | 27553286 |
| chr7 | 27553287 | 27554119 |
| chr7 | 28221356 | 28222792 |
| chr7 | 29376639 | 29378376 |
| chr7 | 29800870 | 29801552 |
| chr7 | 29955491 | 29956250 |
| chr7 | 29956251 | 29957242 |
| chr7 | 30098509 | 30099246 |
| chr7 | 32704092 | 32704904 |
| chr7 | 33620558 | 33621480 |
| chr7 | 35507569 | 35508627 |
| chr7 | 36202815 | 36203818 |
| chr7 | 39947313 | 39947887 |
| chr7 | 42044864 | 42045748 |
| chr7 | 43398777 | 43399678 |
| chr7 | 43790814 | 43791580 |
| chr7 | 43810052 | 43810892 |
| chr7 | 43831466 | 43832128 |
| chr7 | 44302575 | 44303395 |

|      |          |          |
|------|----------|----------|
| chr7 | 44356762 | 44357336 |
| chr7 | 44660072 | 44660918 |
| chr7 | 44660919 | 44661581 |
| chr7 | 44697513 | 44698402 |
| chr7 | 44792456 | 44793284 |
| chr7 | 45581512 | 45582408 |
| chr7 | 45736733 | 45738202 |
| chr7 | 47575847 | 47576817 |
| chr7 | 47894795 | 47896117 |
| chr7 | 47897450 | 47898567 |
| chr7 | 47900924 | 47902375 |
| chr7 | 47902603 | 47903384 |
| chr7 | 50372885 | 50373965 |
| chr7 | 54861999 | 54863002 |
| chr7 | 55415521 | 55416095 |
| chr7 | 55536253 | 55536935 |
| chr7 | 65903597 | 65904565 |
| chr7 | 71920443 | 71921419 |
| chr7 | 72437661 | 72438235 |
| chr7 | 72681051 | 72682472 |
| chr7 | 72687078 | 72687652 |
| chr7 | 72689449 | 72690529 |
| chr7 | 72937773 | 72938801 |
| chr7 | 73517496 | 73518325 |
| chr7 | 73750742 | 73751823 |
| chr7 | 74632651 | 74633696 |
| chr7 | 74870501 | 74871328 |
| chr7 | 75571098 | 75571983 |
| chr7 | 75576253 | 75576962 |
| chr7 | 76336596 | 76337190 |
| chr7 | 79917502 | 79918553 |
| chr7 | 80192464 | 80193177 |
| chr7 | 80193178 | 80193538 |
| chr7 | 84433784 | 84434817 |
| chr7 | 86425666 | 86426771 |
| chr7 | 87498677 | 87499286 |
| chr7 | 87500468 | 87501506 |
| chr7 | 92105579 | 92106268 |
| chr7 | 92389351 | 92390541 |
| chr7 | 92832778 | 92833352 |

|      |           |           |
|------|-----------|-----------|
| chr7 | 93164542  | 93165412  |
| chr7 | 93188521  | 93189095  |
| chr7 | 97672915  | 97673972  |
| chr7 | 98384180  | 98385128  |
| chr7 | 98449870  | 98450634  |
| chr7 | 98452127  | 98453089  |
| chr7 | 98509466  | 98510697  |
| chr7 | 98515922  | 98516961  |
| chr7 | 98650081  | 98650655  |
| chr7 | 98860671  | 98861720  |
| chr7 | 99583307  | 99584100  |
| chr7 | 100321403 | 100322319 |
| chr7 | 100361125 | 100362150 |
| chr7 | 100362516 | 100364206 |
| chr7 | 100867276 | 100868114 |
| chr7 | 101629723 | 101630555 |
| chr7 | 101712541 | 101713167 |
| chr7 | 101765585 | 101766273 |
| chr7 | 101784803 | 101785497 |
| chr7 | 101806305 | 101806879 |
| chr7 | 101864928 | 101865694 |
| chr7 | 101905516 | 101906178 |
| chr7 | 102578976 | 102579769 |
| chr7 | 105518148 | 105518834 |
| chr7 | 111682880 | 111684016 |
| chr7 | 115444943 | 115446147 |
| chr7 | 115451704 | 115452879 |
| chr7 | 115758127 | 115758776 |
| chr7 | 115758777 | 115759216 |
| chr7 | 115905463 | 115907326 |
| chr7 | 116010531 | 116011263 |
| chr7 | 116187194 | 116187954 |
| chr7 | 117417442 | 117418016 |
| chr7 | 117455521 | 117456095 |
| chr7 | 129192206 | 129193284 |
| chr7 | 129526388 | 129527255 |
| chr7 | 129607309 | 129608105 |
| chr7 | 133921417 | 133922394 |
| chr7 | 135065445 | 135066346 |
| chr7 | 138923947 | 138924978 |

|      |           |           |
|------|-----------|-----------|
| chr7 | 139850169 | 139850780 |
| chr7 | 140162801 | 140163481 |
| chr7 | 142629334 | 142630445 |
| chr7 | 143370504 | 143371329 |
| chr7 | 143421771 | 143422473 |
| chr7 | 143449096 | 143449921 |
| chr7 | 143496604 | 143497287 |
| chr7 | 148368243 | 148369245 |
| chr7 | 150248146 | 150249009 |
| chr8 | 5357      | 6258      |
| chr8 | 51265     | 51875     |
| chr8 | 143828    | 145046    |
| chr8 | 568860    | 571332    |
| chr8 | 1721590   | 1722578   |
| chr8 | 1774484   | 1775361   |
| chr8 | 8122841   | 8123486   |
| chr8 | 8123775   | 8124499   |
| chr8 | 10548847  | 10550127  |
| chr8 | 11763524  | 11764098  |
| chr8 | 12087673  | 12088898  |
| chr8 | 12337289  | 12337883  |
| chr8 | 12338135  | 12339143  |
| chr8 | 14455454  | 14456139  |
| chr8 | 17250816  | 17251390  |
| chr8 | 17704116  | 17704833  |
| chr8 | 17707377  | 17708233  |
| chr8 | 19214633  | 19215548  |
| chr8 | 22022843  | 22023669  |
| chr8 | 22495411  | 22495985  |
| chr8 | 22510550  | 22511615  |
| chr8 | 22900103  | 22900968  |
| chr8 | 22980929  | 22981503  |
| chr8 | 22987557  | 22988778  |
| chr8 | 23258748  | 23259434  |
| chr8 | 25092545  | 25093817  |
| chr8 | 25097352  | 25097926  |
| chr8 | 25099076  | 25099686  |
| chr8 | 26924112  | 26924722  |
| chr8 | 27530361  | 27531312  |
| chr8 | 30059136  | 30060015  |

|      |           |           |
|------|-----------|-----------|
| chr8 | 30060016  | 30060913  |
| chr8 | 30634466  | 30635109  |
| chr8 | 37667868  | 37668705  |
| chr8 | 38081430  | 38082036  |
| chr8 | 38975601  | 38976340  |
| chr8 | 38977684  | 38978258  |
| chr8 | 40131374  | 40131985  |
| chr8 | 42027204  | 42027851  |
| chr8 | 42242237  | 42243125  |
| chr8 | 49665043  | 49665906  |
| chr8 | 49997919  | 49999459  |
| chr8 | 55096382  | 55097273  |
| chr8 | 57285938  | 57286550  |
| chr8 | 57395363  | 57396358  |
| chr8 | 57397745  | 57398541  |
| chr8 | 67198557  | 67199651  |
| chr8 | 67741174  | 67741821  |
| chr8 | 71684872  | 71685624  |
| chr8 | 71686560  | 71687604  |
| chr8 | 81158257  | 81159309  |
| chr8 | 81159310  | 81160563  |
| chr8 | 82066374  | 82067294  |
| chr8 | 82073490  | 82074805  |
| chr8 | 82915265  | 82915839  |
| chr8 | 90985484  | 90986058  |
| chr8 | 100094063 | 100094681 |
| chr8 | 102031304 | 102032483 |
| chr8 | 102573824 | 102574434 |
| chr8 | 103734712 | 103735873 |
| chr8 | 103739025 | 103739673 |
| chr8 | 103887336 | 103888169 |
| chr8 | 103888313 | 103889636 |
| chr8 | 103944211 | 103945016 |
| chr8 | 119193891 | 119194683 |
| chr8 | 120286526 | 120287175 |
| chr8 | 120288090 | 120289637 |
| chr8 | 120290364 | 120290938 |
| chr8 | 124259814 | 124260703 |
| chr8 | 124477418 | 124477992 |
| chr8 | 124477993 | 124478503 |



|      |           |           |
|------|-----------|-----------|
| chr8 | 124618910 | 124620202 |
| chr8 | 127638998 | 127639572 |
| chr8 | 127643774 | 127644450 |
| chr8 | 128816150 | 128817035 |
| chr8 | 128876445 | 128877019 |
| chr8 | 134378578 | 134379805 |
| chr8 | 142080917 | 142082141 |
| chr8 | 142207209 | 142207783 |
| chr8 | 143754183 | 143755286 |
| chr8 | 144726842 | 144727671 |
| chr8 | 145085427 | 145086901 |
| chr8 | 145276068 | 145276718 |
| chr8 | 145420096 | 145420746 |
| chr8 | 145618673 | 145620427 |
| chr9 | 18463     | 19042     |
| chr9 | 168508    | 169302    |
| chr9 | 696912    | 697865    |
| chr9 | 697866    | 698668    |
| chr9 | 5828966   | 5830099   |
| chr9 | 21678291  | 21679171  |
| chr9 | 23672464  | 23673038  |
| chr9 | 27509058  | 27510848  |
| chr9 | 33223595  | 33224463  |
| chr9 | 33280487  | 33281681  |
| chr9 | 33436724  | 33437298  |
| chr9 | 33803970  | 33804718  |
| chr9 | 34366423  | 34366997  |
| chr9 | 35721315  | 35722227  |
| chr9 | 39277354  | 39278286  |
| chr9 | 39588643  | 39589573  |
| chr9 | 40318313  | 40319248  |
| chr9 | 40361859  | 40362790  |
| chr9 | 40953898  | 40954721  |
| chr9 | 41349652  | 41350475  |
| chr9 | 43092209  | 43093140  |
| chr9 | 43136944  | 43137942  |
| chr9 | 45120044  | 45120622  |
| chr9 | 45796219  | 45799050  |
| chr9 | 65595727  | 65599246  |
| chr9 | 65811520  | 65815259  |

|      |          |          |
|------|----------|----------|
| chr9 | 67556255 | 67556902 |
| chr9 | 67556903 | 67559701 |
| chr9 | 67679834 | 67681122 |
| chr9 | 67902906 | 67903522 |
| chr9 | 67997985 | 67999080 |
| chr9 | 68086056 | 68087010 |
| chr9 | 68965160 | 68965734 |
| chr9 | 69015003 | 69016294 |
| chr9 | 69017484 | 69018277 |
| chr9 | 69018449 | 69020679 |
| chr9 | 69980715 | 69981842 |
| chr9 | 70264075 | 70264922 |
| chr9 | 71610562 | 71611570 |
| chr9 | 71613496 | 71614882 |
| chr9 | 72209867 | 72210441 |
| chr9 | 72996715 | 72997289 |
| chr9 | 72997290 | 72997598 |
| chr9 | 74871633 | 74872706 |
| chr9 | 74931868 | 74932653 |
| chr9 | 76238700 | 76239274 |
| chr9 | 81534075 | 81535348 |
| chr9 | 82904869 | 82906188 |
| chr9 | 82906239 | 82907103 |
| chr9 | 83551911 | 83553145 |
| chr9 | 83823570 | 83824588 |
| chr9 | 85587489 | 85588577 |
| chr9 | 86935701 | 86936311 |
| chr9 | 88232040 | 88233003 |
| chr9 | 88233237 | 88234303 |
| chr9 | 89025030 | 89025604 |
| chr9 | 89449592 | 89452183 |
| chr9 | 90643529 | 90644261 |
| chr9 | 91264476 | 91265539 |
| chr9 | 91941995 | 91942867 |
| chr9 | 92521527 | 92522561 |
| chr9 | 92522562 | 92523242 |
| chr9 | 92612156 | 92613073 |
| chr9 | 92815732 | 92816632 |
| chr9 | 94215880 | 94216684 |
| chr9 | 94216734 | 94217635 |

|      |           |           |
|------|-----------|-----------|
| chr9 | 96258829  | 96259588  |
| chr9 | 96259882  | 96260755  |
| chr9 | 96260756  | 96261510  |
| chr9 | 96262001  | 96262936  |
| chr9 | 96291127  | 96291701  |
| chr9 | 96461581  | 96462284  |
| chr9 | 96854174  | 96855230  |
| chr9 | 96883730  | 96884384  |
| chr9 | 96887639  | 96888882  |
| chr9 | 96903834  | 96905151  |
| chr9 | 98097327  | 98098243  |
| chr9 | 98623323  | 98624306  |
| chr9 | 99063602  | 99064282  |
| chr9 | 99662608  | 99663182  |
| chr9 | 100268069 | 100269127 |
| chr9 | 100269827 | 100270625 |
| chr9 | 100270626 | 100271775 |
| chr9 | 100417430 | 100418377 |
| chr9 | 103935458 | 103936633 |
| chr9 | 106701820 | 106702812 |
| chr9 | 106762390 | 106763994 |
| chr9 | 107116382 | 107117453 |
| chr9 | 107331072 | 107331709 |
| chr9 | 107331710 | 107332182 |
| chr9 | 107880880 | 107881932 |
| chr9 | 107881955 | 107884188 |
| chr9 | 108676823 | 108677816 |
| chr9 | 108775566 | 108776140 |
| chr9 | 108853938 | 108854859 |
| chr9 | 108959656 | 108960443 |
| chr9 | 109339060 | 109339901 |
| chr9 | 109481583 | 109482549 |
| chr9 | 110096666 | 110097840 |
| chr9 | 110811600 | 110812471 |
| chr9 | 110818803 | 110819738 |
| chr9 | 110882023 | 110882672 |
| chr9 | 111472396 | 111473572 |
| chr9 | 112015956 | 112016964 |
| chr9 | 112175991 | 112176603 |
| chr9 | 112220993 | 112221780 |

|      |           |           |
|------|-----------|-----------|
| chr9 | 112559136 | 112559905 |
| chr9 | 112994140 | 112994857 |
| chr9 | 113183283 | 113184199 |
| chr9 | 113252151 | 113253001 |
| chr9 | 113420328 | 113421685 |
| chr9 | 114453657 | 114454267 |
| chr9 | 114645679 | 114647224 |
| chr9 | 114958039 | 114959113 |
| chr9 | 114959729 | 114960303 |
| chr9 | 114960304 | 114961301 |
| chr9 | 114968582 | 114969567 |
| chr9 | 116534578 | 116535994 |
| chr9 | 117545764 | 117546747 |
| chr9 | 120718044 | 120718909 |
| chr9 | 121127841 | 121129110 |
| chr9 | 121138760 | 121139369 |
| chr9 | 121176717 | 121177671 |
| chr9 | 121214466 | 121215844 |
| chr9 | 121541905 | 121542999 |
| chr9 | 122771875 | 122772486 |
| chr9 | 122782919 | 122784016 |
| chr9 | 124100807 | 124101474 |
| chr9 | 124620820 | 124621675 |
| chr9 | 125084794 | 125085473 |
| chr9 | 127415952 | 127416963 |
| chr9 | 127420480 | 127421490 |
| chr9 | 127760789 | 127761747 |
| chr9 | 127796971 | 127798023 |
| chr9 | 127807133 | 127807846 |
| chr9 | 127810054 | 127811042 |
| chr9 | 127811194 | 127812088 |
| chr9 | 128034763 | 128035480 |
| chr9 | 128164972 | 128165582 |
| chr9 | 128628614 | 128629214 |
| chr9 | 128743796 | 128745098 |
| chr9 | 128745603 | 128746331 |
| chr9 | 129175241 | 129176750 |
| chr9 | 129593413 | 129594725 |
| chr9 | 129676437 | 129677151 |
| chr9 | 129883619 | 129884193 |

|       |           |           |
|-------|-----------|-----------|
| chr9  | 130331535 | 130332498 |
| chr9  | 130483691 | 130484265 |
| chr9  | 130739046 | 130740192 |
| chr9  | 131618825 | 131619908 |
| chr9  | 132935278 | 132936321 |
| chr9  | 136652239 | 136652962 |
| chr9  | 136863756 | 136864624 |
| chr9  | 137253410 | 137254489 |
| chr9  | 137255894 | 137256605 |
| chr9  | 137256720 | 137257464 |
| chr9  | 137734994 | 137735996 |
| chr9  | 137736309 | 137737440 |
| chr9  | 137737441 | 137738420 |
| chr9  | 137738421 | 137739340 |
| chr9  | 137781932 | 137783269 |
| chr9  | 138403870 | 138405124 |
| chr10 | 729039    | 729876    |
| chr10 | 1084483   | 1085742   |
| chr10 | 3814582   | 3815860   |
| chr10 | 4988917   | 4989886   |
| chr10 | 5040895   | 5042010   |
| chr10 | 5323663   | 5324397   |
| chr10 | 5477300   | 5478091   |
| chr10 | 5893864   | 5894476   |
| chr10 | 8135598   | 8136432   |
| chr10 | 8697800   | 8698992   |
| chr10 | 8700411   | 8701702   |
| chr10 | 14683707  | 14684490  |
| chr10 | 17283330  | 17283977  |
| chr10 | 17309742  | 17311028  |
| chr10 | 17312258  | 17313150  |
| chr10 | 21503787  | 21504361  |
| chr10 | 21845681  | 21846697  |
| chr10 | 21846698  | 21847106  |
| chr10 | 21862270  | 21863103  |
| chr10 | 22255712  | 22256425  |
| chr10 | 23674666  | 23675515  |
| chr10 | 24812200  | 24813300  |
| chr10 | 24817270  | 24818334  |
| chr10 | 25050668  | 25051718  |

|       |          |          |
|-------|----------|----------|
| chr10 | 27487172 | 27488021 |
| chr10 | 29963566 | 29964889 |
| chr10 | 30020175 | 30021303 |
| chr10 | 30762758 | 30763332 |
| chr10 | 32255359 | 32256398 |
| chr10 | 32256399 | 32256733 |
| chr10 | 33287256 | 33288050 |
| chr10 | 33290681 | 33291507 |
| chr10 | 33291845 | 33292419 |
| chr10 | 38339840 | 38340450 |
| chr10 | 38731993 | 38732587 |
| chr10 | 42000388 | 42001485 |
| chr10 | 42598501 | 42599075 |
| chr10 | 46182236 | 46183034 |
| chr10 | 46188656 | 46189634 |
| chr10 | 46570857 | 46573599 |
| chr10 | 46590616 | 46593035 |
| chr10 | 46593117 | 46594795 |
| chr10 | 46667496 | 46668322 |
| chr10 | 46669498 | 46670393 |
| chr10 | 47216223 | 47217946 |
| chr10 | 47217981 | 47219852 |
| chr10 | 47219853 | 47220400 |
| chr10 | 47237543 | 47239351 |
| chr10 | 47239352 | 47240121 |
| chr10 | 47467035 | 47467860 |
| chr10 | 47805704 | 47806502 |
| chr10 | 47874541 | 47876263 |
| chr10 | 47876830 | 47878717 |
| chr10 | 47895871 | 47897679 |
| chr10 | 47897680 | 47898449 |
| chr10 | 48571960 | 48572771 |
| chr10 | 48576662 | 48577309 |
| chr10 | 48578541 | 48579405 |
| chr10 | 48865276 | 48868854 |
| chr10 | 48868976 | 48870573 |
| chr10 | 49131638 | 49132492 |
| chr10 | 49277592 | 49279225 |
| chr10 | 49484660 | 49485347 |
| chr10 | 50859649 | 50860295 |

|       |          |          |
|-------|----------|----------|
| chr10 | 51560887 | 51561712 |
| chr10 | 51822533 | 51823672 |
| chr10 | 52033723 | 52034728 |
| chr10 | 52051274 | 52052220 |
| chr10 | 53128800 | 53129768 |
| chr10 | 55334526 | 55335136 |
| chr10 | 59765100 | 59766524 |
| chr10 | 61394788 | 61396000 |
| chr10 | 63332315 | 63332921 |
| chr10 | 63475595 | 63476649 |
| chr10 | 63697624 | 63698198 |
| chr10 | 64246496 | 64247343 |
| chr10 | 64698343 | 64699625 |
| chr10 | 64894992 | 64896656 |
| chr10 | 69503946 | 69504744 |
| chr10 | 69664623 | 69665443 |
| chr10 | 69762365 | 69763239 |
| chr10 | 69972450 | 69973195 |
| chr10 | 70876119 | 70877390 |
| chr10 | 71661739 | 71662493 |
| chr10 | 71904737 | 71906529 |
| chr10 | 72245856 | 72247026 |
| chr10 | 73702395 | 73703146 |
| chr10 | 74117824 | 74118398 |
| chr10 | 75159441 | 75160203 |
| chr10 | 75301614 | 75302429 |
| chr10 | 75336028 | 75336996 |
| chr10 | 75338535 | 75339665 |
| chr10 | 75428921 | 75429773 |
| chr10 | 75606492 | 75607425 |
| chr10 | 76637351 | 76638808 |
| chr10 | 80498391 | 80499230 |
| chr10 | 80937685 | 80938501 |
| chr10 | 81257679 | 81258394 |
| chr10 | 81953341 | 81954226 |
| chr10 | 82001287 | 82002157 |
| chr10 | 82162788 | 82163820 |
| chr10 | 88397233 | 88398438 |
| chr10 | 88708422 | 88709397 |
| chr10 | 88720299 | 88720904 |

|       |           |           |
|-------|-----------|-----------|
| chr10 | 88831513  | 88832557  |
| chr10 | 88833986  | 88834560  |
| chr10 | 88844945  | 88845657  |
| chr10 | 89092055  | 89092629  |
| chr10 | 89403462  | 89404076  |
| chr10 | 90559143  | 90560276  |
| chr10 | 90740620  | 90741250  |
| chr10 | 92670328  | 92671835  |
| chr10 | 94324157  | 94324731  |
| chr10 | 95038690  | 95039264  |
| chr10 | 95186543  | 95187417  |
| chr10 | 95188130  | 95188967  |
| chr10 | 95231754  | 95232821  |
| chr10 | 97044697  | 97045697  |
| chr10 | 99321170  | 99321918  |
| chr10 | 99324071  | 99324934  |
| chr10 | 99439442  | 99440016  |
| chr10 | 99463381  | 99464407  |
| chr10 | 100018632 | 100019962 |
| chr10 | 101369941 | 101370774 |
| chr10 | 101370775 | 101371755 |
| chr10 | 101410439 | 101411013 |
| chr10 | 101411014 | 101411868 |
| chr10 | 101525446 | 101526138 |
| chr10 | 101726397 | 101727372 |
| chr10 | 102035027 | 102037459 |
| chr10 | 102114419 | 102115190 |
| chr10 | 102120479 | 102121570 |
| chr10 | 103533763 | 103534474 |
| chr10 | 104253010 | 104253690 |
| chr10 | 104395270 | 104396675 |
| chr10 | 104990911 | 104991792 |
| chr10 | 105022708 | 105023660 |
| chr10 | 105228628 | 105229415 |
| chr10 | 105445853 | 105446928 |
| chr10 | 105665791 | 105666850 |
| chr10 | 105835032 | 105836132 |
| chr10 | 105840318 | 105841179 |
| chr10 | 105867460 | 105868402 |
| chr10 | 105869176 | 105870338 |



|       |           |           |
|-------|-----------|-----------|
| chr10 | 105870339 | 105871696 |
| chr10 | 106084726 | 106085686 |
| chr10 | 112615058 | 112615632 |
| chr10 | 115603961 | 115604708 |
| chr10 | 116151636 | 116152936 |
| chr10 | 116275055 | 116275780 |
| chr10 | 116275781 | 116276663 |
| chr10 | 118497425 | 118498176 |
| chr10 | 118753764 | 118754575 |
| chr10 | 120830481 | 120831055 |
| chr10 | 124123189 | 124124379 |
| chr10 | 124757683 | 124758397 |
| chr10 | 126422330 | 126422940 |
| chr10 | 126470584 | 126471158 |
| chr10 | 127565454 | 127566423 |
| chr10 | 127579358 | 127580299 |
| chr10 | 127581453 | 127582298 |
| chr10 | 127651422 | 127652529 |
| chr10 | 131826783 | 131827357 |
| chr10 | 133595450 | 133596174 |
| chr10 | 134196018 | 134197232 |
| chr10 | 135225834 | 135226547 |
| chr10 | 135392109 | 135393211 |
| chr11 | 163813    | 165081    |
| chr11 | 352663    | 354076    |
| chr11 | 399951    | 401171    |
| chr11 | 401172    | 402209    |
| chr11 | 402210    | 402857    |
| chr11 | 496543    | 497428    |
| chr11 | 682616    | 683396    |
| chr11 | 687273    | 688528    |
| chr11 | 824105    | 825480    |
| chr11 | 1804821   | 1805871   |
| chr11 | 1806461   | 1807277   |
| chr11 | 1808240   | 1809135   |
| chr11 | 2156277   | 2156919   |
| chr11 | 2246841   | 2247616   |
| chr11 | 2906729   | 2908347   |
| chr11 | 3399039   | 3400033   |
| chr11 | 3400312   | 3401040   |

|       |          |          |
|-------|----------|----------|
| chr11 | 5598439  | 5599235  |
| chr11 | 6297225  | 6297823  |
| chr11 | 6367428  | 6368073  |
| chr11 | 8696403  | 8698171  |
| chr11 | 8792020  | 8793210  |
| chr11 | 8884401  | 8885542  |
| chr11 | 9438626  | 9439514  |
| chr11 | 9543656  | 9545076  |
| chr11 | 9546663  | 9547853  |
| chr11 | 9641935  | 9642545  |
| chr11 | 10281510 | 10282632 |
| chr11 | 10284774 | 10285926 |
| chr11 | 10836088 | 10836662 |
| chr11 | 11983190 | 11984027 |
| chr11 | 12265626 | 12266489 |
| chr11 | 12985840 | 12986414 |
| chr11 | 13248944 | 13249720 |
| chr11 | 13440049 | 13440819 |
| chr11 | 13641411 | 13642657 |
| chr11 | 16990676 | 16991525 |
| chr11 | 18083904 | 18084551 |
| chr11 | 18307118 | 18307881 |
| chr11 | 18372592 | 18373166 |
| chr11 | 19218657 | 19219231 |
| chr11 | 19690290 | 19690965 |
| chr11 | 20013294 | 20014539 |
| chr11 | 24474578 | 24475447 |
| chr11 | 27018318 | 27019105 |
| chr11 | 27029922 | 27030533 |
| chr11 | 32807343 | 32808259 |
| chr11 | 32989429 | 32990043 |
| chr11 | 32990044 | 32990375 |
| chr11 | 33700618 | 33701823 |
| chr11 | 34598726 | 34599699 |
| chr11 | 35117159 | 35118146 |
| chr11 | 35598195 | 35599082 |
| chr11 | 36433810 | 36434384 |
| chr11 | 44074448 | 44075394 |
| chr11 | 44289928 | 44290638 |
| chr11 | 44840002 | 44841253 |

|       |          |          |
|-------|----------|----------|
| chr11 | 46099708 | 46100282 |
| chr11 | 46692614 | 46693316 |
| chr11 | 47165648 | 47166258 |
| chr11 | 47194158 | 47195204 |
| chr11 | 47385679 | 47386598 |
| chr11 | 56849225 | 56849874 |
| chr11 | 57054712 | 57055358 |
| chr11 | 57191499 | 57192073 |
| chr11 | 57235964 | 57236565 |
| chr11 | 58101241 | 58102867 |
| chr11 | 58103356 | 58104180 |
| chr11 | 59310861 | 59311651 |
| chr11 | 59900199 | 59901118 |
| chr11 | 60682792 | 60683559 |
| chr11 | 60821238 | 60822451 |
| chr11 | 61341163 | 61341737 |
| chr11 | 61344034 | 61344923 |
| chr11 | 61344924 | 61345479 |
| chr11 | 61496157 | 61497717 |
| chr11 | 62070151 | 62070725 |
| chr11 | 62071652 | 62072680 |
| chr11 | 62076438 | 62077411 |
| chr11 | 62077412 | 62078230 |
| chr11 | 62115282 | 62116162 |
| chr11 | 62380186 | 62380795 |
| chr11 | 62405066 | 62405677 |
| chr11 | 63462072 | 63462988 |
| chr11 | 63764104 | 63765070 |
| chr11 | 63769319 | 63770115 |
| chr11 | 63848589 | 63849327 |
| chr11 | 63858752 | 63859784 |
| chr11 | 64252110 | 64252714 |
| chr11 | 64366527 | 64367101 |
| chr11 | 64367662 | 64368624 |
| chr11 | 64400719 | 64401400 |
| chr11 | 64530544 | 64531492 |
| chr11 | 64646173 | 64646908 |
| chr11 | 64905453 | 64907363 |
| chr11 | 65015487 | 65016479 |
| chr11 | 65016480 | 65017203 |

|       |          |          |
|-------|----------|----------|
| chr11 | 65020966 | 65021739 |
| chr11 | 65023893 | 65025505 |
| chr11 | 65027643 | 65029008 |
| chr11 | 65081166 | 65081989 |
| chr11 | 65083735 | 65085448 |
| chr11 | 65310464 | 65311239 |
| chr11 | 65315950 | 65317749 |
| chr11 | 65424313 | 65425231 |
| chr11 | 65439292 | 65440475 |
| chr11 | 65536386 | 65537749 |
| chr11 | 65860334 | 65861376 |
| chr11 | 66291901 | 66292674 |
| chr11 | 66429786 | 66430579 |
| chr11 | 66481946 | 66483024 |
| chr11 | 66494660 | 66495708 |
| chr11 | 66578926 | 66580426 |
| chr11 | 66876960 | 66878071 |
| chr11 | 66878072 | 66878882 |
| chr11 | 66897706 | 66899064 |
| chr11 | 66902899 | 66904268 |
| chr11 | 67328287 | 67329236 |
| chr11 | 67329336 | 67330096 |
| chr11 | 67737272 | 67737932 |
| chr11 | 68811732 | 68813390 |
| chr11 | 69604208 | 69605406 |
| chr11 | 69727350 | 69728183 |
| chr11 | 71008105 | 71008788 |
| chr11 | 71175593 | 71176167 |
| chr11 | 71176510 | 71177468 |
| chr11 | 71468251 | 71468861 |
| chr11 | 71525414 | 71525988 |
| chr11 | 72201620 | 72202694 |
| chr11 | 72606885 | 72607545 |
| chr11 | 72765450 | 72766381 |
| chr11 | 74331290 | 74332374 |
| chr11 | 74333361 | 74334080 |
| chr11 | 74337318 | 74338035 |
| chr11 | 76170497 | 76171267 |
| chr11 | 76176947 | 76177795 |
| chr11 | 77123104 | 77123719 |

|       |           |           |
|-------|-----------|-----------|
| chr11 | 85107684  | 85108258  |
| chr11 | 85457742  | 85459348  |
| chr11 | 85633702  | 85634276  |
| chr11 | 86190936  | 86191971  |
| chr11 | 87550070  | 87550895  |
| chr11 | 87551543  | 87552783  |
| chr11 | 87552784  | 87553287  |
| chr11 | 87783168  | 87784449  |
| chr11 | 87787704  | 87788720  |
| chr11 | 91874085  | 91874700  |
| chr11 | 93866060  | 93866634  |
| chr11 | 94140452  | 94141377  |
| chr11 | 95162522  | 95163354  |
| chr11 | 95468663  | 95469237  |
| chr11 | 95471423  | 95472487  |
| chr11 | 100060641 | 100061620 |
| chr11 | 101487405 | 101488601 |
| chr11 | 101692922 | 101693875 |
| chr11 | 102155841 | 102157372 |
| chr11 | 102159380 | 102160569 |
| chr11 | 102226943 | 102227945 |
| chr11 | 102333572 | 102334548 |
| chr11 | 104422569 | 104423661 |
| chr11 | 107233605 | 107234214 |
| chr11 | 107873102 | 107874089 |
| chr11 | 109670867 | 109671441 |
| chr11 | 109672724 | 109673564 |
| chr11 | 110979195 | 110979769 |
| chr11 | 111254625 | 111255910 |
| chr11 | 111538672 | 111539552 |
| chr11 | 113153712 | 113154651 |
| chr11 | 116520642 | 116521216 |
| chr11 | 117450573 | 117451293 |
| chr11 | 117639672 | 117640952 |
| chr11 | 117984282 | 117985104 |
| chr11 | 118265529 | 118266542 |
| chr11 | 118286104 | 118287323 |
| chr11 | 118287842 | 118289028 |
| chr11 | 118470968 | 118471542 |
| chr11 | 118582544 | 118583331 |

|       |           |           |
|-------|-----------|-----------|
| chr11 | 124457711 | 124458997 |
| chr11 | 125777959 | 125778811 |
| chr11 | 127897331 | 127898329 |
| chr11 | 128398723 | 128399674 |
| chr11 | 128436661 | 128437802 |
| chr11 | 129221353 | 129222547 |
| chr11 | 129377778 | 129378595 |
| chr11 | 129378596 | 129379114 |
| chr11 | 129411865 | 129412759 |
| chr12 | 6251523   | 6252607   |
| chr12 | 6324545   | 6325411   |
| chr12 | 6351905   | 6352961   |
| chr12 | 6615072   | 6616267   |
| chr12 | 10219437  | 10220820  |
| chr12 | 10223220  | 10224308  |
| chr12 | 10255838  | 10256817  |
| chr12 | 10347414  | 10348558  |
| chr12 | 10465760  | 10466818  |
| chr12 | 10481184  | 10482278  |
| chr12 | 12915913  | 12917669  |
| chr12 | 12934475  | 12936114  |
| chr12 | 13141997  | 13143924  |
| chr12 | 13144521  | 13145389  |
| chr12 | 13240055  | 13241415  |
| chr12 | 14814082  | 14814691  |
| chr12 | 14815018  | 14815592  |
| chr12 | 15005354  | 15006393  |
| chr12 | 15833556  | 15834377  |
| chr12 | 18734761  | 18735803  |
| chr12 | 24991005  | 24991784  |
| chr12 | 25098009  | 25099592  |
| chr12 | 26170507  | 26171081  |
| chr12 | 27816258  | 27817221  |
| chr12 | 28011604  | 28012178  |
| chr12 | 28013748  | 28014774  |
| chr12 | 28017297  | 28020606  |
| chr12 | 32150753  | 32151368  |
| chr12 | 32722096  | 32722710  |
| chr12 | 32941102  | 32942122  |
| chr12 | 43895330  | 43896267  |

|       |          |          |
|-------|----------|----------|
| chr12 | 44408461 | 44409252 |
| chr12 | 45051235 | 45052314 |
| chr12 | 45760674 | 45761870 |
| chr12 | 45765648 | 45766472 |
| chr12 | 46448132 | 46449237 |
| chr12 | 47474847 | 47475421 |
| chr12 | 47945465 | 47946079 |
| chr12 | 48881698 | 48882665 |
| chr12 | 48900012 | 48901001 |
| chr12 | 48904259 | 48904833 |
| chr12 | 50871880 | 50872702 |
| chr12 | 50909954 | 50911655 |
| chr12 | 51120964 | 51121881 |
| chr12 | 51172991 | 51174006 |
| chr12 | 51174007 | 51174672 |
| chr12 | 51200259 | 51201224 |
| chr12 | 51201280 | 51202828 |
| chr12 | 51478986 | 51479920 |
| chr12 | 51480609 | 51481470 |
| chr12 | 51583726 | 51584398 |
| chr12 | 51586145 | 51586798 |
| chr12 | 52675035 | 52675964 |
| chr12 | 52698469 | 52699190 |
| chr12 | 52701363 | 52702044 |
| chr12 | 54010343 | 54010917 |
| chr12 | 55620388 | 55622204 |
| chr12 | 55636785 | 55638236 |
| chr12 | 55664865 | 55666403 |
| chr12 | 55768064 | 55768683 |
| chr12 | 55807043 | 55807762 |
| chr12 | 55845413 | 55846338 |
| chr12 | 57605180 | 57605754 |
| chr12 | 63132298 | 63133227 |
| chr12 | 63849979 | 63851318 |
| chr12 | 64328381 | 64329847 |
| chr12 | 65948931 | 65949505 |
| chr12 | 67488644 | 67489601 |
| chr12 | 67918785 | 67919833 |
| chr12 | 69318691 | 69319741 |
| chr12 | 70520082 | 70520980 |

|       |           |           |
|-------|-----------|-----------|
| chr12 | 74009629  | 74010538  |
| chr12 | 74070243  | 74070860  |
| chr12 | 78587168  | 78588682  |
| chr12 | 83807451  | 83808168  |
| chr12 | 87037898  | 87038472  |
| chr12 | 87041877  | 87042712  |
| chr12 | 88248312  | 88249452  |
| chr12 | 88249989  | 88250794  |
| chr12 | 91040370  | 91041534  |
| chr12 | 94369570  | 94370222  |
| chr12 | 95091430  | 95092513  |
| chr12 | 95381172  | 95382102  |
| chr12 | 95383233  | 95384204  |
| chr12 | 101016318 | 101017064 |
| chr12 | 103182083 | 103184057 |
| chr12 | 105988715 | 105989371 |
| chr12 | 107625821 | 107627190 |
| chr12 | 109834882 | 109835538 |
| chr12 | 113584159 | 113585336 |
| chr12 | 118076596 | 118077360 |
| chr12 | 119164843 | 119165417 |
| chr12 | 120691944 | 120693119 |
| chr12 | 120699663 | 120700918 |
| chr12 | 121430915 | 121431489 |
| chr12 | 121431938 | 121432512 |
| chr12 | 121526677 | 121527485 |
| chr12 | 121712393 | 121713187 |
| chr12 | 121725884 | 121726591 |
| chr12 | 121730326 | 121731214 |
| chr12 | 121761629 | 121762440 |
| chr12 | 121839935 | 121840770 |
| chr12 | 121905242 | 121906133 |
| chr12 | 122103780 | 122104692 |
| chr12 | 123923254 | 123924418 |
| chr12 | 123926238 | 123927105 |
| chr12 | 129348959 | 129349941 |
| chr12 | 130861169 | 130861743 |
| chr13 | 19254730  | 19255343  |
| chr13 | 22168208  | 22168855  |
| chr13 | 23428151  | 23429208  |



|       |           |           |
|-------|-----------|-----------|
| chr13 | 23983305  | 23985032  |
| chr13 | 26897699  | 26898840  |
| chr13 | 27092916  | 27093882  |
| chr13 | 27645952  | 27646526  |
| chr13 | 29066021  | 29067967  |
| chr13 | 29321362  | 29321972  |
| chr13 | 30089551  | 30090279  |
| chr13 | 32757537  | 32758111  |
| chr13 | 40532233  | 40533114  |
| chr13 | 40533260  | 40534207  |
| chr13 | 40604622  | 40605196  |
| chr13 | 41513131  | 41514156  |
| chr13 | 43631281  | 43632505  |
| chr13 | 44049308  | 44050300  |
| chr13 | 46026138  | 46026712  |
| chr13 | 47473610  | 47474184  |
| chr13 | 49058778  | 49060097  |
| chr13 | 51275250  | 51276610  |
| chr13 | 51921211  | 51922192  |
| chr13 | 52089283  | 52090076  |
| chr13 | 72247812  | 72248498  |
| chr13 | 74961132  | 74961833  |
| chr13 | 78953732  | 78954416  |
| chr13 | 95126263  | 95127078  |
| chr13 | 95127756  | 95128683  |
| chr13 | 96723185  | 96724281  |
| chr13 | 96724816  | 96726211  |
| chr13 | 98032908  | 98033740  |
| chr13 | 100899954 | 100901342 |
| chr13 | 100904098 | 100905720 |
| chr13 | 109758721 | 109759371 |
| chr13 | 109762631 | 109763559 |
| chr13 | 110319872 | 110321327 |
| chr13 | 110365179 | 110365794 |
| chr13 | 112889338 | 112889912 |
| chr13 | 113151296 | 113152013 |
| chr13 | 113195437 | 113196370 |
| chr13 | 113546369 | 113547063 |
| chr14 | 19273700  | 19274346  |
| chr14 | 20007588  | 20008676  |

|       |          |          |
|-------|----------|----------|
| chr14 | 20524619 | 20525456 |
| chr14 | 20525457 | 20526222 |
| chr14 | 20922492 | 20923066 |
| chr14 | 21453581 | 21454332 |
| chr14 | 21455511 | 21456156 |
| chr14 | 21575884 | 21576458 |
| chr14 | 22519167 | 22519931 |
| chr14 | 22521571 | 22522145 |
| chr14 | 22709899 | 22710865 |
| chr14 | 23652757 | 23653628 |
| chr14 | 30746882 | 30747456 |
| chr14 | 34412339 | 34412956 |
| chr14 | 34942393 | 34943033 |
| chr14 | 35365543 | 35366274 |
| chr14 | 36736568 | 36737610 |
| chr14 | 37133887 | 37135997 |
| chr14 | 38805306 | 38806158 |
| chr14 | 49766814 | 49767822 |
| chr14 | 50204097 | 50204745 |
| chr14 | 51188141 | 51188775 |
| chr14 | 51189253 | 51189827 |
| chr14 | 51609845 | 51610496 |
| chr14 | 52236587 | 52237990 |
| chr14 | 52265791 | 52266517 |
| chr14 | 53977595 | 53978420 |
| chr14 | 54663550 | 54664877 |
| chr14 | 55077147 | 55078248 |
| chr14 | 57029000 | 57029686 |
| chr14 | 57834358 | 57835200 |
| chr14 | 58173125 | 58174375 |
| chr14 | 59783995 | 59784786 |
| chr14 | 60858999 | 60859943 |
| chr14 | 62740419 | 62741028 |
| chr14 | 63177855 | 63178972 |
| chr14 | 63390103 | 63391015 |
| chr14 | 64040946 | 64041520 |
| chr14 | 64075379 | 64076414 |
| chr14 | 64235008 | 64236031 |
| chr14 | 64239304 | 64240453 |
| chr14 | 64240454 | 64240994 |

|       |          |          |
|-------|----------|----------|
| chr14 | 64298031 | 64299387 |
| chr14 | 64639385 | 64639959 |
| chr14 | 66723344 | 66724490 |
| chr14 | 66778144 | 66779012 |
| chr14 | 66895615 | 66896807 |
| chr14 | 66947840 | 66949420 |
| chr14 | 66950016 | 66951537 |
| chr14 | 67209953 | 67210594 |
| chr14 | 67253098 | 67253792 |
| chr14 | 68328870 | 68329444 |
| chr14 | 68329884 | 68331059 |
| chr14 | 68513556 | 68514470 |
| chr14 | 68614045 | 68614877 |
| chr14 | 68615212 | 68616805 |
| chr14 | 68934597 | 68935239 |
| chr14 | 69147545 | 69148153 |
| chr14 | 70177135 | 70178462 |
| chr14 | 70344516 | 70345162 |
| chr14 | 72594286 | 72595338 |
| chr14 | 72673179 | 72673825 |
| chr14 | 73073830 | 73075050 |
| chr14 | 73105835 | 73106896 |
| chr14 | 73249978 | 73251853 |
| chr14 | 73322100 | 73322711 |
| chr14 | 74151086 | 74152086 |
| chr14 | 74152606 | 74154435 |
| chr14 | 74154753 | 74155327 |
| chr14 | 74155328 | 74156520 |
| chr14 | 74418816 | 74419390 |
| chr14 | 74604998 | 74605844 |
| chr14 | 74712755 | 74713554 |
| chr14 | 76497350 | 76498771 |
| chr14 | 76563627 | 76564291 |
| chr14 | 76564510 | 76565597 |
| chr14 | 76569239 | 76570390 |
| chr14 | 76633174 | 76634449 |
| chr14 | 76856024 | 76856705 |
| chr14 | 77151530 | 77152184 |
| chr14 | 80755393 | 80756040 |
| chr14 | 80756812 | 80758102 |

|       |           |           |
|-------|-----------|-----------|
| chr14 | 80935847  | 80936979  |
| chr14 | 80936980  | 80938093  |
| chr14 | 88089711  | 88090696  |
| chr14 | 92043098  | 92043921  |
| chr14 | 92047409  | 92048171  |
| chr14 | 92721224  | 92721798  |
| chr14 | 92867779  | 92868897  |
| chr14 | 92869284  | 92869949  |
| chr14 | 93494973  | 93496743  |
| chr14 | 99776882  | 99777491  |
| chr14 | 101345892 | 101346529 |
| chr14 | 102663459 | 102664150 |
| chr14 | 102908314 | 102909314 |
| chr14 | 102922263 | 102922944 |
| chr14 | 102923074 | 102923726 |
| chr14 | 103160957 | 103161588 |
| chr14 | 103163165 | 103163804 |
| chr14 | 103163805 | 103164721 |
| chr14 | 104217655 | 104218947 |
| chr14 | 104225144 | 104225718 |
| chr14 | 104558678 | 104559519 |
| chr14 | 105027980 | 105029039 |
| chr14 | 105238379 | 105238987 |
| chr15 | 27900618  | 27901516  |
| chr15 | 27901986  | 27902711  |
| chr15 | 28704424  | 28706023  |
| chr15 | 30693880  | 30695564  |
| chr15 | 31093028  | 31093963  |
| chr15 | 31147371  | 31149099  |
| chr15 | 31323041  | 31323645  |
| chr15 | 32117211  | 32117860  |
| chr15 | 36330683  | 36331916  |
| chr15 | 37327438  | 37328496  |
| chr15 | 37658449  | 37660815  |
| chr15 | 38183993  | 38184761  |
| chr15 | 38188552  | 38189161  |
| chr15 | 38318330  | 38319773  |
| chr15 | 38459009  | 38459970  |
| chr15 | 38848651  | 38849789  |
| chr15 | 38925029  | 38926094  |

|       |          |          |
|-------|----------|----------|
| chr15 | 38973509 | 38974083 |
| chr15 | 39412242 | 39412856 |
| chr15 | 39637981 | 39638709 |
| chr15 | 40352611 | 40353349 |
| chr15 | 40353350 | 40354196 |
| chr15 | 40570198 | 40571124 |
| chr15 | 40574094 | 40575294 |
| chr15 | 40758458 | 40759384 |
| chr15 | 40759385 | 40759766 |
| chr15 | 41000124 | 41000730 |
| chr15 | 41298681 | 41299404 |
| chr15 | 41671866 | 41672902 |
| chr15 | 41771698 | 41772765 |
| chr15 | 42366984 | 42368376 |
| chr15 | 42506701 | 42507311 |
| chr15 | 42616337 | 42616947 |
| chr15 | 43481396 | 43481970 |
| chr15 | 43710955 | 43711599 |
| chr15 | 48434217 | 48434791 |
| chr15 | 48989434 | 48990307 |
| chr15 | 49907863 | 49909000 |
| chr15 | 50050887 | 50051758 |
| chr15 | 50099003 | 50100214 |
| chr15 | 50100339 | 50101059 |
| chr15 | 50258416 | 50259099 |
| chr15 | 50761682 | 50762256 |
| chr15 | 50961257 | 50961866 |
| chr15 | 53487145 | 53487838 |
| chr15 | 53996373 | 53998012 |
| chr15 | 54073159 | 54073994 |
| chr15 | 54078811 | 54079706 |
| chr15 | 54998888 | 55000031 |
| chr15 | 56849781 | 56850644 |
| chr15 | 57184865 | 57185510 |
| chr15 | 57279209 | 57280256 |
| chr15 | 58470009 | 58471654 |
| chr15 | 58471655 | 58473325 |
| chr15 | 58476092 | 58477473 |
| chr15 | 58477474 | 58478457 |
| chr15 | 58478498 | 58479329 |

|       |          |          |
|-------|----------|----------|
| chr15 | 58479330 | 58479914 |
| chr15 | 60143124 | 60144351 |
| chr15 | 61235993 | 61236712 |
| chr15 | 61583215 | 61583918 |
| chr15 | 63596840 | 63597523 |
| chr15 | 63875356 | 63876707 |
| chr15 | 64373900 | 64374474 |
| chr15 | 64583742 | 64584316 |
| chr15 | 64780744 | 64781536 |
| chr15 | 64781537 | 64782402 |
| chr15 | 65127853 | 65129018 |
| chr15 | 65144764 | 65145601 |
| chr15 | 66350756 | 66352160 |
| chr15 | 66354381 | 66355248 |
| chr15 | 66431661 | 66432235 |
| chr15 | 66433866 | 66434925 |
| chr15 | 68173700 | 68174274 |
| chr15 | 68842772 | 68843369 |
| chr15 | 68874257 | 68875416 |
| chr15 | 69868968 | 69870489 |
| chr15 | 69870490 | 69871374 |
| chr15 | 70310719 | 70311866 |
| chr15 | 70316386 | 70317343 |
| chr15 | 70735269 | 70736059 |
| chr15 | 71712887 | 71714610 |
| chr15 | 72067231 | 72068136 |
| chr15 | 72068642 | 72069472 |
| chr15 | 72159936 | 72160863 |
| chr15 | 72272034 | 72273547 |
| chr15 | 72275070 | 72276400 |
| chr15 | 72279457 | 72281578 |
| chr15 | 72294072 | 72294840 |
| chr15 | 72614227 | 72614993 |
| chr15 | 72614994 | 72615680 |
| chr15 | 72619759 | 72620671 |
| chr15 | 73115414 | 73116384 |
| chr15 | 73187503 | 73188473 |
| chr15 | 73280194 | 73281127 |
| chr15 | 73282037 | 73282611 |
| chr15 | 73339129 | 73339839 |

|       |          |          |
|-------|----------|----------|
| chr15 | 73363395 | 73364227 |
| chr15 | 73529239 | 73530440 |
| chr15 | 73800264 | 73800838 |
| chr15 | 73803149 | 73803834 |
| chr15 | 73915962 | 73916864 |
| chr15 | 73923477 | 73924146 |
| chr15 | 74388588 | 74389162 |
| chr15 | 74390735 | 74391404 |
| chr15 | 74391466 | 74392812 |
| chr15 | 76004354 | 76005106 |
| chr15 | 76952463 | 76953504 |
| chr15 | 77030705 | 77032032 |
| chr15 | 77083465 | 77084483 |
| chr15 | 78002327 | 78003109 |
| chr15 | 78515645 | 78516728 |
| chr15 | 78856172 | 78858276 |
| chr15 | 79080883 | 79081457 |
| chr15 | 80125387 | 80126381 |
| chr15 | 80341224 | 80341811 |
| chr15 | 80341812 | 80342198 |
| chr15 | 80433720 | 80434332 |
| chr15 | 80585338 | 80585957 |
| chr15 | 80741126 | 80741709 |
| chr15 | 80820086 | 80820891 |
| chr15 | 80980026 | 80980600 |
| chr15 | 81741949 | 81742694 |
| chr15 | 81743689 | 81744263 |
| chr15 | 81744331 | 81745246 |
| chr15 | 81745430 | 81746893 |
| chr15 | 81746894 | 81747694 |
| chr15 | 81747695 | 81749507 |
| chr15 | 82689825 | 82690723 |
| chr15 | 83091455 | 83092726 |
| chr15 | 83579003 | 83579696 |
| chr15 | 83723885 | 83724956 |
| chr15 | 86966993 | 86967969 |
| chr15 | 87431727 | 87432978 |
| chr15 | 87541546 | 87542120 |
| chr15 | 87679123 | 87679909 |
| chr15 | 87842432 | 87843294 |

|       |           |           |
|-------|-----------|-----------|
| chr15 | 87846790  | 87848091  |
| chr15 | 89212309  | 89213198  |
| chr15 | 89213583  | 89214645  |
| chr15 | 89216438  | 89217959  |
| chr15 | 96304342  | 96304916  |
| chr15 | 97007375  | 97007949  |
| chr15 | 97256715  | 97258872  |
| chr15 | 97608534  | 97609254  |
| chr15 | 97922910  | 97923997  |
| chr15 | 99276011  | 99276968  |
| chr15 | 100318919 | 100319655 |
| chr16 | 518477    | 519127    |
| chr16 | 579411    | 580082    |
| chr16 | 1368590   | 1369692   |
| chr16 | 2153114   | 2153979   |
| chr16 | 2848044   | 2849073   |
| chr16 | 3010128   | 3011515   |
| chr16 | 3011516   | 3012276   |
| chr16 | 3013215   | 3013825   |
| chr16 | 4604658   | 4605232   |
| chr16 | 4933074   | 4933990   |
| chr16 | 5086764   | 5087465   |
| chr16 | 5087654   | 5088539   |
| chr16 | 11783059  | 11783671  |
| chr16 | 11917429  | 11918450  |
| chr16 | 11937416  | 11938398  |
| chr16 | 14707973  | 14709367  |
| chr16 | 14709694  | 14710988  |
| chr16 | 14718026  | 14719008  |
| chr16 | 14747095  | 14748489  |
| chr16 | 14748816  | 14750110  |
| chr16 | 14757150  | 14758132  |
| chr16 | 14943770  | 14944728  |
| chr16 | 15114422  | 15115175  |
| chr16 | 15118905  | 15119786  |
| chr16 | 15373617  | 15374575  |
| chr16 | 15381693  | 15383034  |
| chr16 | 15383307  | 15384697  |
| chr16 | 15645014  | 15646098  |
| chr16 | 15646295  | 15647221  |



|       |          |          |
|-------|----------|----------|
| chr16 | 15947601 | 15948533 |
| chr16 | 16342461 | 16343245 |
| chr16 | 16385819 | 16386603 |
| chr16 | 18328143 | 18328777 |
| chr16 | 18368287 | 18368921 |
| chr16 | 18779202 | 18780074 |
| chr16 | 18785425 | 18786273 |
| chr16 | 18844616 | 18845375 |
| chr16 | 19436200 | 19436921 |
| chr16 | 19439285 | 19440443 |
| chr16 | 19473780 | 19474595 |
| chr16 | 20823328 | 20824309 |
| chr16 | 21332297 | 21333279 |
| chr16 | 21343212 | 21344497 |
| chr16 | 21344786 | 21346240 |
| chr16 | 21368123 | 21369182 |
| chr16 | 21436727 | 21437701 |
| chr16 | 21437702 | 21439547 |
| chr16 | 21764753 | 21765735 |
| chr16 | 21775489 | 21776777 |
| chr16 | 21777037 | 21778520 |
| chr16 | 21800520 | 21801134 |
| chr16 | 22216905 | 22217525 |
| chr16 | 22407340 | 22408399 |
| chr16 | 22430278 | 22431732 |
| chr16 | 22431981 | 22433309 |
| chr16 | 22443244 | 22444226 |
| chr16 | 22731722 | 22733136 |
| chr16 | 22734907 | 22736035 |
| chr16 | 27245382 | 27246431 |
| chr16 | 28270225 | 28271199 |
| chr16 | 28280932 | 28282220 |
| chr16 | 28384061 | 28385040 |
| chr16 | 28554832 | 28555545 |
| chr16 | 28555546 | 28556092 |
| chr16 | 28556785 | 28557870 |
| chr16 | 28567615 | 28568573 |
| chr16 | 28670653 | 28671981 |
| chr16 | 28681731 | 28682719 |
| chr16 | 28961682 | 28962661 |

|       |          |          |
|-------|----------|----------|
| chr16 | 29311288 | 29312270 |
| chr16 | 29321912 | 29323200 |
| chr16 | 29323597 | 29324474 |
| chr16 | 29324475 | 29324928 |
| chr16 | 29346836 | 29347858 |
| chr16 | 29353145 | 29353915 |
| chr16 | 29372619 | 29373524 |
| chr16 | 29412819 | 29413801 |
| chr16 | 29423702 | 29425042 |
| chr16 | 29425277 | 29426712 |
| chr16 | 29448749 | 29449664 |
| chr16 | 29529401 | 29530174 |
| chr16 | 29530175 | 29531007 |
| chr16 | 29531008 | 29532408 |
| chr16 | 29726036 | 29726610 |
| chr16 | 29729720 | 29730294 |
| chr16 | 30111961 | 30112827 |
| chr16 | 30152791 | 30153773 |
| chr16 | 30163684 | 30164972 |
| chr16 | 30165260 | 30166695 |
| chr16 | 30188734 | 30189649 |
| chr16 | 30576525 | 30577099 |
| chr16 | 30660009 | 30660618 |
| chr16 | 30868561 | 30869430 |
| chr16 | 45279328 | 45280438 |
| chr16 | 45420778 | 45421455 |
| chr16 | 45421456 | 45422081 |
| chr16 | 46835277 | 46835997 |
| chr16 | 51643621 | 51644565 |
| chr16 | 51685474 | 51686165 |
| chr16 | 51689674 | 51692098 |
| chr16 | 53520682 | 53521437 |
| chr16 | 54062313 | 54063665 |
| chr16 | 54159524 | 54160174 |
| chr16 | 55197311 | 55200509 |
| chr16 | 55201507 | 55202289 |
| chr16 | 55452300 | 55453400 |
| chr16 | 55682394 | 55683512 |
| chr16 | 55782056 | 55783112 |
| chr16 | 56210606 | 56212305 |

|       |          |          |
|-------|----------|----------|
| chr16 | 56219379 | 56219953 |
| chr16 | 56392446 | 56393447 |
| chr16 | 56393769 | 56394378 |
| chr16 | 56399133 | 56400144 |
| chr16 | 56401053 | 56402354 |
| chr16 | 56403504 | 56404718 |
| chr16 | 56406054 | 56407245 |
| chr16 | 56407418 | 56408513 |
| chr16 | 56840657 | 56841267 |
| chr16 | 57219477 | 57220085 |
| chr16 | 65077946 | 65078715 |
| chr16 | 65832601 | 65833515 |
| chr16 | 66825940 | 66826550 |
| chr16 | 66828205 | 66828844 |
| chr16 | 66855106 | 66855990 |
| chr16 | 66855991 | 66857606 |
| chr16 | 67227193 | 67228427 |
| chr16 | 68576301 | 68577283 |
| chr16 | 68586880 | 68588169 |
| chr16 | 68588464 | 68589473 |
| chr16 | 68589474 | 68589896 |
| chr16 | 68813487 | 68814511 |
| chr16 | 70486026 | 70487250 |
| chr16 | 72881703 | 72882315 |
| chr16 | 72959582 | 72960156 |
| chr16 | 72973573 | 72974531 |
| chr16 | 74077040 | 74077981 |
| chr16 | 80037380 | 80038205 |
| chr16 | 80084501 | 80085490 |
| chr16 | 81218879 | 81220141 |
| chr16 | 81220142 | 81220599 |
| chr16 | 83091951 | 83093192 |
| chr16 | 83209601 | 83210429 |
| chr16 | 83619590 | 83621110 |
| chr16 | 84205762 | 84206750 |
| chr16 | 86089935 | 86090692 |
| chr16 | 86457476 | 86459032 |
| chr16 | 86459033 | 86460621 |
| chr16 | 86461536 | 86462144 |
| chr16 | 88515367 | 88516619 |

|       |          |          |
|-------|----------|----------|
| chr16 | 88588144 | 88590340 |
| chr16 | 88716492 | 88717746 |
| chr16 | 88814186 | 88815087 |
| chr17 | 181842   | 183546   |
| chr17 | 578735   | 579381   |
| chr17 | 579428   | 580299   |
| chr17 | 827601   | 828751   |
| chr17 | 960763   | 961763   |
| chr17 | 964771   | 965848   |
| chr17 | 1564640  | 1565545  |
| chr17 | 2251418  | 2252065  |
| chr17 | 2254885  | 2255966  |
| chr17 | 2255967  | 2257949  |
| chr17 | 2442965  | 2443671  |
| chr17 | 2484230  | 2485118  |
| chr17 | 3517294  | 3518041  |
| chr17 | 3738389  | 3739483  |
| chr17 | 4342772  | 4343617  |
| chr17 | 4559647  | 4560353  |
| chr17 | 4789002  | 4789982  |
| chr17 | 4792824  | 4794074  |
| chr17 | 5263473  | 5264084  |
| chr17 | 5428226  | 5429533  |
| chr17 | 6486070  | 6487749  |
| chr17 | 7063949  | 7064796  |
| chr17 | 7106519  | 7107519  |
| chr17 | 7194957  | 7195531  |
| chr17 | 7195532  | 7196924  |
| chr17 | 7198126  | 7199167  |
| chr17 | 7682908  | 7683857  |
| chr17 | 7685001  | 7687812  |
| chr17 | 7731865  | 7732657  |
| chr17 | 7962054  | 7962976  |
| chr17 | 7964272  | 7964846  |
| chr17 | 8034780  | 8035354  |
| chr17 | 8228770  | 8229480  |
| chr17 | 8860827  | 8862122  |
| chr17 | 9520443  | 9521425  |
| chr17 | 10218911 | 10219738 |
| chr17 | 15486456 | 15487284 |

|       |          |          |
|-------|----------|----------|
| chr17 | 15489148 | 15490773 |
| chr17 | 15495568 | 15496436 |
| chr17 | 15501477 | 15503367 |
| chr17 | 16666120 | 16667214 |
| chr17 | 16689617 | 16691623 |
| chr17 | 17684543 | 17685834 |
| chr17 | 18027367 | 18027976 |
| chr17 | 18269166 | 18271177 |
| chr17 | 18317678 | 18318627 |
| chr17 | 18320177 | 18321530 |
| chr17 | 18562327 | 18563839 |
| chr17 | 18565820 | 18566612 |
| chr17 | 18848676 | 18849273 |
| chr17 | 18854896 | 18855818 |
| chr17 | 18937137 | 18937905 |
| chr17 | 19002233 | 19002998 |
| chr17 | 19063174 | 19063939 |
| chr17 | 19562819 | 19563829 |
| chr17 | 19596757 | 19597513 |
| chr17 | 19999762 | 20000494 |
| chr17 | 20000495 | 20001155 |
| chr17 | 20310713 | 20312035 |
| chr17 | 20313608 | 20314557 |
| chr17 | 20337748 | 20338663 |
| chr17 | 20361147 | 20363158 |
| chr17 | 20542126 | 20543402 |
| chr17 | 20545049 | 20545959 |
| chr17 | 21125788 | 21126691 |
| chr17 | 21128176 | 21129056 |
| chr17 | 21131202 | 21132336 |
| chr17 | 22645954 | 22646528 |
| chr17 | 22661161 | 22661885 |
| chr17 | 22981828 | 22982803 |
| chr17 | 24079106 | 24079680 |
| chr17 | 25922491 | 25923078 |
| chr17 | 25923100 | 25924408 |
| chr17 | 26256873 | 26257473 |
| chr17 | 26403353 | 26404302 |
| chr17 | 29603570 | 29604648 |
| chr17 | 32922048 | 32923486 |

|       |          |          |
|-------|----------|----------|
| chr17 | 35338870 | 35339610 |
| chr17 | 35508459 | 35509033 |
| chr17 | 35510501 | 35511302 |
| chr17 | 35693187 | 35694676 |
| chr17 | 36529535 | 36530109 |
| chr17 | 36762384 | 36762958 |
| chr17 | 36813488 | 36814627 |
| chr17 | 36929062 | 36930119 |
| chr17 | 36930278 | 36931296 |
| chr17 | 36931297 | 36932228 |
| chr17 | 36939359 | 36940534 |
| chr17 | 36996201 | 36997385 |
| chr17 | 36997697 | 36998725 |
| chr17 | 37021946 | 37023200 |
| chr17 | 37033823 | 37036105 |
| chr17 | 37064058 | 37064632 |
| chr17 | 37065145 | 37066090 |
| chr17 | 37097771 | 37098345 |
| chr17 | 37193976 | 37194767 |
| chr17 | 37202455 | 37203610 |
| chr17 | 37833620 | 37834452 |
| chr17 | 38901705 | 38902900 |
| chr17 | 39192450 | 39193474 |
| chr17 | 39570920 | 39571530 |
| chr17 | 40726187 | 40727606 |
| chr17 | 40751723 | 40753230 |
| chr17 | 40753745 | 40754801 |
| chr17 | 43252044 | 43252810 |
| chr17 | 43252811 | 43253480 |
| chr17 | 43477971 | 43478932 |
| chr17 | 44404363 | 44405523 |
| chr17 | 45482814 | 45483859 |
| chr17 | 45487335 | 45488261 |
| chr17 | 45610179 | 45611398 |
| chr17 | 46298756 | 46299417 |
| chr17 | 46482057 | 46483034 |
| chr17 | 46553785 | 46554866 |
| chr17 | 46585543 | 46586554 |
| chr17 | 52347850 | 52348820 |
| chr17 | 53333352 | 53334355 |

|       |          |          |
|-------|----------|----------|
| chr17 | 55051347 | 55052316 |
| chr17 | 58235440 | 58236507 |
| chr17 | 59932587 | 59933387 |
| chr17 | 60087215 | 60088498 |
| chr17 | 60088755 | 60089442 |
| chr17 | 60401790 | 60402575 |
| chr17 | 62672811 | 62674147 |
| chr17 | 63609622 | 63610479 |
| chr17 | 63610480 | 63610904 |
| chr17 | 64071816 | 64073353 |
| chr17 | 64833823 | 64834808 |
| chr17 | 70495755 | 70496505 |
| chr17 | 70662647 | 70663256 |
| chr17 | 71287091 | 71287668 |
| chr17 | 71487262 | 71487982 |
| chr17 | 72787521 | 72788716 |
| chr17 | 72793100 | 72794988 |
| chr17 | 72795751 | 72797007 |
| chr17 | 73649716 | 73650290 |
| chr17 | 75842769 | 75843569 |
| chr17 | 76193877 | 76194664 |
| chr17 | 76625635 | 76626209 |
| chr17 | 76917494 | 76918540 |
| chr17 | 78440411 | 78441508 |
| chr18 | 93845    | 94951    |
| chr18 | 608648   | 609257   |
| chr18 | 3437807  | 3438420  |
| chr18 | 3438716  | 3440178  |
| chr18 | 3440231  | 3440833  |
| chr18 | 3443655  | 3444629  |
| chr18 | 3583116  | 3584418  |
| chr18 | 3585084  | 3586374  |
| chr18 | 3592400  | 3594192  |
| chr18 | 3594345  | 3594991  |
| chr18 | 9006704  | 9008193  |
| chr18 | 11618161 | 11619143 |
| chr18 | 11628752 | 11629830 |
| chr18 | 11630324 | 11631768 |
| chr18 | 12298456 | 12299329 |
| chr18 | 19286441 | 19288504 |

|       |          |          |
|-------|----------|----------|
| chr18 | 19420518 | 19421402 |
| chr18 | 20104616 | 20105416 |
| chr18 | 22383128 | 22383826 |
| chr18 | 26935995 | 26938084 |
| chr18 | 27209996 | 27211013 |
| chr18 | 27281227 | 27282162 |
| chr18 | 27344500 | 27345402 |
| chr18 | 27345825 | 27347233 |
| chr18 | 30872617 | 30874152 |
| chr18 | 31335740 | 31336673 |
| chr18 | 40514317 | 40515199 |
| chr18 | 42167207 | 42167781 |
| chr18 | 44728720 | 44729294 |
| chr18 | 44732416 | 44733633 |
| chr18 | 44733634 | 44733955 |
| chr18 | 44735266 | 44736873 |
| chr18 | 44737206 | 44738065 |
| chr18 | 45598268 | 45599080 |
| chr18 | 45877716 | 45878572 |
| chr18 | 50646534 | 50647155 |
| chr18 | 51407582 | 51408553 |
| chr18 | 53863703 | 53864581 |
| chr18 | 54486835 | 54489229 |
| chr18 | 55717233 | 55718246 |
| chr18 | 57709262 | 57710276 |
| chr18 | 57714823 | 57715433 |
| chr18 | 58533428 | 58534002 |
| chr18 | 58535561 | 58536135 |
| chr18 | 59184329 | 59184903 |
| chr18 | 59245222 | 59246341 |
| chr18 | 59289949 | 59291375 |
| chr18 | 59294317 | 59295930 |
| chr18 | 59404810 | 59405641 |
| chr18 | 59459138 | 59460192 |
| chr18 | 59476841 | 59477831 |
| chr18 | 59592806 | 59594395 |
| chr18 | 59698075 | 59698759 |
| chr18 | 59699569 | 59701875 |
| chr18 | 59787784 | 59789293 |
| chr18 | 66023376 | 66024108 |



|       |          |          |
|-------|----------|----------|
| chr18 | 66104376 | 66105156 |
| chr19 | 21619    | 22350    |
| chr19 | 195064   | 196330   |
| chr19 | 407605   | 408319   |
| chr19 | 628264   | 628838   |
| chr19 | 703263   | 704630   |
| chr19 | 967454   | 968518   |
| chr19 | 972345   | 972919   |
| chr19 | 1216373  | 1217499  |
| chr19 | 2427119  | 2427693  |
| chr19 | 3005988  | 3006562  |
| chr19 | 3123457  | 3124544  |
| chr19 | 3124703  | 3125922  |
| chr19 | 3126216  | 3126878  |
| chr19 | 3471374  | 3472225  |
| chr19 | 3508609  | 3509675  |
| chr19 | 4862532  | 4863650  |
| chr19 | 4865821  | 4866588  |
| chr19 | 5237765  | 5238844  |
| chr19 | 5526467  | 5527311  |
| chr19 | 6716745  | 6718215  |
| chr19 | 7346957  | 7347605  |
| chr19 | 7361679  | 7362862  |
| chr19 | 8326120  | 8327327  |
| chr19 | 8332534  | 8333429  |
| chr19 | 10482023 | 10482597 |
| chr19 | 12755303 | 12757287 |
| chr19 | 12757288 | 12757855 |
| chr19 | 12757856 | 12758658 |
| chr19 | 12760362 | 12760971 |
| chr19 | 12760972 | 12761448 |
| chr19 | 12761845 | 12762936 |
| chr19 | 13126001 | 13126575 |
| chr19 | 14061638 | 14062470 |
| chr19 | 14391222 | 14391796 |
| chr19 | 14448080 | 14448958 |
| chr19 | 14497353 | 14498188 |
| chr19 | 14804259 | 14804833 |
| chr19 | 16041966 | 16042540 |
| chr19 | 17308196 | 17309206 |

|       |          |          |
|-------|----------|----------|
| chr19 | 17768805 | 17769563 |
| chr19 | 18017814 | 18018388 |
| chr19 | 18649496 | 18650585 |
| chr19 | 22731797 | 22732408 |
| chr19 | 34846814 | 34847388 |
| chr19 | 41319180 | 41320251 |
| chr19 | 41322819 | 41323515 |
| chr19 | 43482890 | 43483880 |
| chr19 | 44013391 | 44014505 |
| chr19 | 44019494 | 44021649 |
| chr19 | 45640949 | 45641772 |
| chr19 | 45912772 | 45914452 |
| chr19 | 46118448 | 46119641 |
| chr19 | 46186898 | 46187502 |
| chr19 | 46281176 | 46281959 |
| chr19 | 46459387 | 46460431 |
| chr19 | 47907084 | 47907732 |
| chr19 | 48028484 | 48029173 |
| chr19 | 48094748 | 48095587 |
| chr19 | 48444679 | 48445406 |
| chr19 | 48661643 | 48662217 |
| chr19 | 48948628 | 48949695 |
| chr19 | 48954954 | 48956039 |
| chr19 | 48976896 | 48977973 |
| chr19 | 48978392 | 48979311 |
| chr19 | 49936533 | 49937731 |
| chr19 | 50426729 | 50427586 |
| chr19 | 50536051 | 50536767 |
| chr19 | 50600025 | 50601801 |
| chr19 | 50673378 | 50674428 |
| chr19 | 51417097 | 51418087 |
| chr19 | 52427582 | 52428367 |
| chr19 | 54066981 | 54067704 |
| chr19 | 54067714 | 54068288 |
| chr19 | 54070013 | 54070954 |
| chr19 | 54219682 | 54221638 |
| chr19 | 54224288 | 54226229 |
| chr19 | 54232493 | 54234654 |
| chr19 | 54236675 | 54238381 |
| chr19 | 54238382 | 54239093 |

|       |          |          |
|-------|----------|----------|
| chr19 | 54244606 | 54246391 |
| chr19 | 54250514 | 54251630 |
| chr19 | 54255989 | 54257038 |
| chr19 | 55071839 | 55072451 |
| chr19 | 55127224 | 55127798 |
| chr19 | 56127196 | 56127986 |
| chr19 | 56164348 | 56165135 |
| chr19 | 59942899 | 59943544 |
| chr19 | 59959391 | 59960409 |
| chr19 | 59974091 | 59975157 |
| chr19 | 60038746 | 60039320 |
| chr19 | 60272224 | 60273549 |
| chr19 | 60419370 | 60420237 |
| chr19 | 60539024 | 60539794 |
| chr19 | 60542630 | 60543273 |
| chr19 | 63790054 | 63791174 |
| chr20 | 252437   | 253893   |
| chr20 | 1254138  | 1255023  |
| chr20 | 1398129  | 1399146  |
| chr20 | 1418502  | 1419076  |
| chr20 | 3164113  | 3165218  |
| chr20 | 4047908  | 4049057  |
| chr20 | 4100133  | 4101467  |
| chr20 | 4614314  | 4615272  |
| chr20 | 5538734  | 5539588  |
| chr20 | 6050258  | 6051592  |
| chr20 | 6051593  | 6053104  |
| chr20 | 10362631 | 10363692 |
| chr20 | 10547817 | 10548678 |
| chr20 | 10599737 | 10600605 |
| chr20 | 12937631 | 12938205 |
| chr20 | 16456316 | 16457491 |
| chr20 | 17486853 | 17487613 |
| chr20 | 17497088 | 17498148 |
| chr20 | 17897414 | 17898241 |
| chr20 | 19812862 | 19814120 |
| chr20 | 20477107 | 20478897 |
| chr20 | 20480080 | 20480654 |
| chr20 | 21327832 | 21328589 |
| chr20 | 22977739 | 22978461 |

|       |          |          |
|-------|----------|----------|
| chr20 | 23065224 | 23066154 |
| chr20 | 23278309 | 23279143 |
| chr20 | 25552340 | 25553259 |
| chr20 | 29653806 | 29654557 |
| chr20 | 29655113 | 29657295 |
| chr20 | 29770886 | 29772062 |
| chr20 | 30038828 | 30040574 |
| chr20 | 31783515 | 31784451 |
| chr20 | 31785006 | 31785831 |
| chr20 | 31863512 | 31864428 |
| chr20 | 33006507 | 33007546 |
| chr20 | 33266425 | 33267229 |
| chr20 | 34136623 | 34137515 |
| chr20 | 34280927 | 34281579 |
| chr20 | 34636878 | 34637525 |
| chr20 | 35356158 | 35357418 |
| chr20 | 35357419 | 35358136 |
| chr20 | 35586258 | 35587375 |
| chr20 | 35587934 | 35588886 |
| chr20 | 36227631 | 36228242 |
| chr20 | 36229582 | 36230190 |
| chr20 | 36230618 | 36231906 |
| chr20 | 36809862 | 36810436 |
| chr20 | 39402191 | 39402823 |
| chr20 | 42809380 | 42810055 |
| chr20 | 43417848 | 43418422 |
| chr20 | 44034107 | 44034945 |
| chr20 | 44066528 | 44067643 |
| chr20 | 45421044 | 45422054 |
| chr20 | 45422525 | 45423099 |
| chr20 | 45848177 | 45848794 |
| chr20 | 45852746 | 45853497 |
| chr20 | 45853498 | 45854212 |
| chr20 | 45854213 | 45854747 |
| chr20 | 47328049 | 47328644 |
| chr20 | 47856355 | 47857239 |
| chr20 | 48774448 | 48775540 |
| chr20 | 48894341 | 48895286 |
| chr20 | 49852449 | 49854086 |
| chr20 | 54634855 | 54635702 |

|       |          |          |
|-------|----------|----------|
| chr20 | 55334605 | 55335960 |
| chr20 | 55630614 | 55631625 |
| chr20 | 55716599 | 55718110 |
| chr20 | 55718401 | 55719863 |
| chr20 | 55724468 | 55725379 |
| chr20 | 55725880 | 55726801 |
| chr20 | 56638016 | 56639387 |
| chr20 | 57019183 | 57020232 |
| chr20 | 57948654 | 57949581 |
| chr20 | 60167940 | 60168958 |
| chr20 | 60312126 | 60312702 |
| chr20 | 60377806 | 60378380 |
| chr20 | 61026240 | 61026814 |
| chr20 | 61646660 | 61647947 |
| chr21 | 14878892 | 14879529 |
| chr21 | 29593509 | 29594301 |
| chr21 | 34241551 | 34242238 |
| chr21 | 35181914 | 35182764 |
| chr21 | 35340969 | 35342362 |
| chr21 | 35343256 | 35343830 |
| chr21 | 36765124 | 36766162 |
| chr21 | 36771686 | 36773285 |
| chr21 | 37712202 | 37712811 |
| chr21 | 38583269 | 38584238 |
| chr21 | 39091034 | 39092933 |
| chr21 | 39094440 | 39096001 |
| chr21 | 42061064 | 42062520 |
| chr21 | 43956256 | 43956980 |
| chr21 | 44250477 | 44251321 |
| chr21 | 45647220 | 45648022 |
| chr21 | 45671572 | 45672632 |
| chr22 | 15759493 | 15760459 |
| chr22 | 16490094 | 16491370 |
| chr22 | 17144048 | 17144671 |
| chr22 | 17159261 | 17159945 |
| chr22 | 17841029 | 17841737 |
| chr22 | 18681859 | 18682456 |
| chr22 | 18778250 | 18779158 |
| chr22 | 18799519 | 18800824 |
| chr22 | 18834485 | 18835494 |

|       |          |          |
|-------|----------|----------|
| chr22 | 19182572 | 19183742 |
| chr22 | 19186263 | 19187034 |
| chr22 | 19187404 | 19189116 |
| chr22 | 19456206 | 19457357 |
| chr22 | 19910382 | 19911124 |
| chr22 | 20063002 | 20064046 |
| chr22 | 20097762 | 20099055 |
| chr22 | 20119371 | 20120339 |
| chr22 | 20172197 | 20173142 |
| chr22 | 20193461 | 20194801 |
| chr22 | 20228556 | 20229458 |
| chr22 | 21848935 | 21850125 |
| chr22 | 28493843 | 28494487 |
| chr22 | 28562798 | 28563861 |
| chr22 | 28967188 | 28967864 |
| chr22 | 28973093 | 28973990 |
| chr22 | 29136901 | 29137546 |
| chr22 | 29140772 | 29141833 |
| chr22 | 29142904 | 29144525 |
| chr22 | 29963561 | 29965466 |
| chr22 | 30010828 | 30011730 |
| chr22 | 30381618 | 30382192 |
| chr22 | 30382221 | 30382829 |
| chr22 | 30382830 | 30383576 |
| chr22 | 34349881 | 34351033 |
| chr22 | 35106207 | 35107471 |
| chr22 | 35115489 | 35116096 |
| chr22 | 35116312 | 35117249 |
| chr22 | 36245646 | 36246534 |
| chr22 | 36246535 | 36247475 |
| chr22 | 36625404 | 36626394 |
| chr22 | 36900036 | 36901097 |
| chr22 | 37594262 | 37594869 |
| chr22 | 37701238 | 37702240 |
| chr22 | 37895057 | 37895847 |
| chr22 | 38039887 | 38040946 |
| chr22 | 40005921 | 40006495 |
| chr22 | 40008760 | 40009642 |
| chr22 | 41582276 | 41583130 |
| chr22 | 43962545 | 43963494 |

|       |           |           |
|-------|-----------|-----------|
| chr22 | 44770749  | 44771621  |
| chr22 | 44771622  | 44772316  |
| chr22 | 44772425  | 44773523  |
| chr22 | 44785831  | 44786525  |
| chr22 | 44787563  | 44788581  |
| chr22 | 44789175  | 44789749  |
| chr22 | 45458941  | 45460059  |
| chr22 | 48807646  | 48809088  |
| chr22 | 48823577  | 48824532  |
| chr22 | 49488072  | 49489070  |
| chr22 | 49515130  | 49516286  |
| chrX  | 11073457  | 11074063  |
| chrX  | 12752035  | 12753415  |
| chrX  | 15441956  | 15442711  |
| chrX  | 15631403  | 15632240  |
| chrX  | 16422309  | 16423021  |
| chrX  | 17154582  | 17155899  |
| chrX  | 23559130  | 23559774  |
| chrX  | 23678548  | 23679687  |
| chrX  | 27518697  | 27519271  |
| chrX  | 47130044  | 47131026  |
| chrX  | 47131797  | 47132513  |
| chrX  | 48784515  | 48785353  |
| chrX  | 70535612  | 70536186  |
| chrX  | 70545670  | 70546316  |
| chrX  | 87802570  | 87803144  |
| chrX  | 111429811 | 111430685 |
| chrX  | 114080632 | 114081311 |
| chrX  | 114616843 | 114618736 |
| chrX  | 119650025 | 119650900 |
| chrX  | 122719969 | 122720581 |
| chrX  | 129025297 | 129025984 |
| chrX  | 148290268 | 148291310 |
| chrX  | 148312460 | 148313433 |
| chrX  | 149533046 | 149533620 |
| chrX  | 153332730 | 153333616 |
| chrX  | 153818101 | 153818872 |
| chrY  | 2703087   | 2703661   |
| chrY  | 57367598  | 57368172  |

**SUPPLEMENTAL TABLE S4.** Complete list of annotated genes ( $p < 10^{-4}$ ).

| AFFY_ID                                                               | Gene Name                                                                   |
|-----------------------------------------------------------------------|-----------------------------------------------------------------------------|
| 223631_s_at, 231211_s_at                                              | chromosome 19 open reading frame 33                                         |
| 1553852_at, 236254_at,<br>220400_at, 1570196_at,<br>213243_at         | cohen syndrome 1                                                            |
| 1561654_at, 202193_at,<br>210582_s_at                                 | lim domain kinase 2                                                         |
| 205717_x_at, 211066_x_at,<br>215836_s_at, 209079_x_at                 | protocadherin gamma subfamily b, 2                                          |
| 201925_s_at, 241615_x_at,<br>243395_at, 241616_at,<br>201926_s_at     | cd55 antigen, decay accelerating factor for complement (cromer blood group) |
| 204532_x_at, 215125_s_at,<br>221305_s_at, 208596_s_at,<br>207126_x_at | udp glucuronosyltransferase 1 family, polypeptide a9                        |
| 223346_at                                                             | vacuolar protein sorting protein 18                                         |
| 219879_s_at                                                           | chromosome 17 open reading frame 53                                         |
| 203082_at                                                             | bms1-like, ribosome assembly protein (yeast)                                |
| 1559105_at                                                            | hypothetical protein loc152084                                              |
| 1555310_a_at, 1561320_at,<br>219461_at                                | p21(cdkn1a)-activated kinase 6                                              |
| 226739_at                                                             | ring finger protein 169                                                     |
| 217792_at, 222417_s_at,<br>229980_s_at, 238433_at,<br>229981_at       | sorting nexin 5                                                             |
| 207188_at, 229468_at                                                  | cyclin-dependent kinase 3                                                   |
| 202468_s_at                                                           | catenin (cadherin-associated protein), alpha-like 1                         |
| 1554345_a_at, 219467_at                                               | hypothetical protein flj20125                                               |
| 226405_s_at, 234214_at,<br>234607_at                                  | arrestin domain containing 1                                                |
| 224631_at, 224636_at, 226812_at                                       | zinc finger protein 91 homolog (mouse)                                      |
| 1561250_at, 232555_at,<br>242329_at                                   | hypothetical loc401317                                                      |
| 1553691_at, 1561714_a_at,<br>1562391_at, 226233_at                    | udp-galnac:betaglcnac beta 1,3-galactosaminyltransferase, polypeptide 2     |
| 214474_at, 225278_at,<br>1558027_s_at                                 | protein kinase, amp-activated, beta 2 non-catalytic subunit                 |
| 204114_at                                                             | nidogen 2 (osteonidogen)                                                    |
| 213511_s_at, 216303_s_at                                              | myotubularin related protein 1                                              |



|                                                                                                           |                                                                                                                                                                                                                                                                                          |
|-----------------------------------------------------------------------------------------------------------|------------------------------------------------------------------------------------------------------------------------------------------------------------------------------------------------------------------------------------------------------------------------------------------|
| 203224_at, 203225_s_at                                                                                    | riboflavin kinase                                                                                                                                                                                                                                                                        |
| 206411_s_at                                                                                               | v-abl abelson murine leukemia viral oncogene homolog 2 (arg, abelson-related gene)                                                                                                                                                                                                       |
| 221438_s_at                                                                                               | testis expressed sequence 12                                                                                                                                                                                                                                                             |
| 214290_s_at, 218280_x_at                                                                                  | histone 2, h2aa                                                                                                                                                                                                                                                                          |
| 213342_at, 224894_at, 224895_at                                                                           | yes-associated protein 1, 65kda                                                                                                                                                                                                                                                          |
| 231991_at                                                                                                 | chromosome 20 open reading frame 160                                                                                                                                                                                                                                                     |
| 204555_s_at                                                                                               | protein phosphatase 1, regulatory subunit 3d                                                                                                                                                                                                                                             |
| 203962_s_at, 217585_at, 241782_at, 233280_at                                                              | nebullette                                                                                                                                                                                                                                                                               |
| 224801_at, 230190_at, 224799_at, 224802_at                                                                | nedd4 family interacting protein 2                                                                                                                                                                                                                                                       |
| 208057_s_at, 231510_at, 228537_at                                                                         | gli-kruppel family member gli2                                                                                                                                                                                                                                                           |
| 235131_at, 238906_s_at, 235489_at, 238905_at                                                              | ras homolog gene family, member j                                                                                                                                                                                                                                                        |
| 1552889_a_at                                                                                              | protein 7 transactivated by hepatitis b virus x antigen (hbxa)                                                                                                                                                                                                                           |
| 203157_s_at, 244247_at, 241034_at, 223080_at, 223079_s_at, 221510_s_at, 203158_s_at, 211414_at, 203159_at | glutaminase                                                                                                                                                                                                                                                                              |
| 202679_at, 217584_at                                                                                      | niemann-pick disease, type c1                                                                                                                                                                                                                                                            |
| 1566284_at, 230589_at, 240577_at, 238736_at, 208070_s_at                                                  | rev3-like, catalytic subunit of dna polymerase zeta (yeast)                                                                                                                                                                                                                              |
| 223259_at, 240701_at, 235136_at                                                                           | hypothetical protein loc51242                                                                                                                                                                                                                                                            |
| 1555764_s_at, 218408_at                                                                                   | translocase of inner mitochondrial membrane 10 homolog (yeast)                                                                                                                                                                                                                           |
| 238620_at                                                                                                 | ,consensus includes gb:aa678564 /fea=est /db_xref=gi:2659086 /db_xref=est:ah05g01.s1 /clone=image:1155792 /ug=hs.116502 ests,gb:aa678564 /db_xref=gi:2659086 /db_xref=ah05g01.s1 /clone=image:1155792 /fea=est /cnt=9 /tid=hs.116502.0 /tier=consend /stk=2 /ug=hs.116502 /ug_title=ests |
| 1552572_a_at, 1552573_s_at, 1569494_at, 244246_at, 1570052_at                                             | mirror-image polydactyly 1                                                                                                                                                                                                                                                               |
| 212995_x_at, 220720_x_at                                                                                  | hypothetical protein flj14346                                                                                                                                                                                                                                                            |
| 204532_x_at, 207126_x_at, 208596_s_at, 215125_s_at                                                        | udp glucuronosyltransferase 1 family, polypeptide a5                                                                                                                                                                                                                                     |
| 205959_at                                                                                                 | matrix metalloproteinase 13 (collagenase 3)                                                                                                                                                                                                                                              |
| 219456_s_at, 222069_s_at                                                                                  | ras and rab interactor 3                                                                                                                                                                                                                                                                 |

|                                                                                                                                       |                                                                                                                                                                                                                                                               |
|---------------------------------------------------------------------------------------------------------------------------------------|---------------------------------------------------------------------------------------------------------------------------------------------------------------------------------------------------------------------------------------------------------------|
| 219457_s_at, 237277_at,<br>60471_at                                                                                                   |                                                                                                                                                                                                                                                               |
| 218792_s_at, 222746_s_at                                                                                                              | b-box and spry domain containing                                                                                                                                                                                                                              |
| 1560012_at, 210734_x_at,<br>216002_at, 214108_at,<br>209332_s_at, 208403_x_at,<br>209331_s_at                                         | myc associated factor x                                                                                                                                                                                                                                       |
| 206746_at                                                                                                                             | beaded filament structural protein 1, filensin                                                                                                                                                                                                                |
| 202469_s_at, 236582_at,<br>243530_at, 202470_s_at                                                                                     | cleavage and polyadenylation specific factor 6, 68kda                                                                                                                                                                                                         |
| 221252_s_at, 241553_at                                                                                                                | germ cell associated 1                                                                                                                                                                                                                                        |
| 1555022_at, 205823_at,<br>209638_x_at, 242079_at,<br>214362_at, 214361_s_at,<br>209639_s_at, 209637_s_at,<br>1555033_a_at, 1555032_at | regulator of g-protein signalling 12                                                                                                                                                                                                                          |
| 230887_at                                                                                                                             | cdc14 cell division cycle 14 homolog c (s. cerevisiae)                                                                                                                                                                                                        |
| 203725_at                                                                                                                             | growth arrest and dna-damage-inducible, alpha                                                                                                                                                                                                                 |
| 219013_at                                                                                                                             | udp-n-acetyl-alpha-d-galactosamine:polypeptide<br>n-acetylgalactosaminyltransferase 11 (galnac-t11)                                                                                                                                                           |
| 231144_at, 204099_at                                                                                                                  | swi/snf related, matrix associated, actin dependent regulator of<br>chromatin, subfamily d, member 3                                                                                                                                                          |
| 223333_s_at                                                                                                                           | angiopoietin-like 4                                                                                                                                                                                                                                           |
| 205512_s_at, 243353_at                                                                                                                | programmed cell death 8 (apoptosis-inducing factor)                                                                                                                                                                                                           |
| 1565947_a_at                                                                                                                          | ribosomal protein l37                                                                                                                                                                                                                                         |
| 225143_at, 229236_s_at,<br>231505_s_at, 230637_at                                                                                     | sideroflexin 4                                                                                                                                                                                                                                                |
| 206488_s_at, 241929_at,<br>242197_x_at, 209555_s_at                                                                                   | cd36 antigen (collagen type i receptor, thrombospondin receptor)                                                                                                                                                                                              |
| 208493_at, 213823_at                                                                                                                  | homeobox a11                                                                                                                                                                                                                                                  |
| 1555201_a_at, 220329_s_at                                                                                                             | chromosome 6 open reading frame 96                                                                                                                                                                                                                            |
| 231302_at                                                                                                                             | fch and double sh3 domains 2                                                                                                                                                                                                                                  |
| 205754_at                                                                                                                             | coagulation factor ii (thrombin)                                                                                                                                                                                                                              |
| 220907_at, 235988_at, 238689_at                                                                                                       | hypothetical protein flj22684                                                                                                                                                                                                                                 |
| 1559679_a_at, 202773_s_at,<br>202774_s_at, 240078_at,<br>202775_s_at                                                                  | splicing factor, arginine/serine-rich 8 (suppressor-of-white-apricot<br>homolog, drosophila)                                                                                                                                                                  |
| 238213_at                                                                                                                             | ,consensus includes gb:aw510697 /fea=est /db_xref=gi:7148775<br>/db_xref=est:hc89g01.x1 /clone=image:2907216 /ug=hs.120592<br>ests,gb:aw510697 /db_xref=gi:7148775 /db_xref=hc89g01.x1<br>/clone=image:2907216 /fea=est /cnt=7 /tid=hs.120592.0 /tier=consend |

|                                                                |                                          |                                                                                                                                                                                                                                                                                            |
|----------------------------------------------------------------|------------------------------------------|--------------------------------------------------------------------------------------------------------------------------------------------------------------------------------------------------------------------------------------------------------------------------------------------|
|                                                                |                                          | /stk=5 /ug=hs.120592 /ug_title=ests                                                                                                                                                                                                                                                        |
| 212909_at,<br>229105_at                                        | 229104_s_at,                             | ly6/plaur domain containing 1                                                                                                                                                                                                                                                              |
| 215998_at,<br>229912_at, 229407_at                             | 243535_at,                               | sidekick homolog 1 (chicken)                                                                                                                                                                                                                                                               |
| 219224_x_at                                                    |                                          | zinc finger protein 408                                                                                                                                                                                                                                                                    |
| 203080_s_at                                                    |                                          | dkfzp434h071 protein                                                                                                                                                                                                                                                                       |
| 212895_s_at                                                    |                                          | active bcr-related gene                                                                                                                                                                                                                                                                    |
| 214580_x_at                                                    |                                          | keratin 6a                                                                                                                                                                                                                                                                                 |
| 202458_at, 229441_at, 226279_at                                |                                          | protease, serine, 23                                                                                                                                                                                                                                                                       |
| 206860_s_at,<br>209672_s_at                                    | 211724_x_at,                             | hypothetical protein flj20323                                                                                                                                                                                                                                                              |
| 204812_at                                                      |                                          | zw10, kinetochore associated, homolog (drosophila)                                                                                                                                                                                                                                         |
| 1557553_at,<br>224270_at,<br>1555444_a_at,<br>1559911_at       | 201957_at,<br>233700_at,<br>201958_s_at, | protein phosphatase 1, regulatory (inhibitor) subunit 12b                                                                                                                                                                                                                                  |
| 201351_s_at,<br>232216_at                                      | 201352_at,                               | yme1-like 1 (s. cerevisiae)                                                                                                                                                                                                                                                                |
| 206308_at, 232121_at                                           |                                          | dna (cytosine-5-)-methyltransferase 2                                                                                                                                                                                                                                                      |
| 201164_s_at,<br>201165_s_at                                    | 201166_s_at,                             | pumilio homolog 1 (drosophila)                                                                                                                                                                                                                                                             |
| 238264_at                                                      |                                          | ,consensus includes gb:bf110088 /fea=est /db_xref=gi:10939778 /db_xref=est:7n45g11.x1 /clone=image:3567573 /ug=hs.157021 ests,gb:bf110088 /db_xref=gi:10939778 /db_xref=7n45g11.x1 /clone=image:3567573 /fea=est /cnt=7 /tid=hs.157021.0 /tier=consend /stk=7 /ug=hs.157021 /ug_title=ests |
| 222633_at,<br>222634_s_at,<br>241711_at                        | 223013_at,<br>233633_at,                 | transducin (beta)-like 1x-linked receptor 1                                                                                                                                                                                                                                                |
| 219080_s_at, 222819_at                                         |                                          | ctp synthase ii                                                                                                                                                                                                                                                                            |
| 1557257_at,<br>244619_at, 205263_at                            | 1557258_a_at,                            | b-cell cll/lymphoma 10                                                                                                                                                                                                                                                                     |
| 201060_x_at                                                    |                                          | stomatin                                                                                                                                                                                                                                                                                   |
| 205015_s_at,<br>211258_s_at                                    | 205016_at,                               | transforming growth factor, alpha                                                                                                                                                                                                                                                          |
| 1556923_at,<br>207656_s_at,<br>226396_at, 227962_at, 213501_at | 209600_s_at,<br>209601_at,               | acyl-coenzyme a oxidase 1, palmitoyl                                                                                                                                                                                                                                                       |
| 212989_at, 236757_at                                           |                                          | transmembrane protein 23                                                                                                                                                                                                                                                                   |
| 205717_x_at,                                                   | 211066_x_at,                             | protocadherin gamma subfamily b, 3                                                                                                                                                                                                                                                         |

|                                                                                        |                                                                                                                                                                                                                                                                                                                        |
|----------------------------------------------------------------------------------------|------------------------------------------------------------------------------------------------------------------------------------------------------------------------------------------------------------------------------------------------------------------------------------------------------------------------|
| 209079_x_at, 215836_s_at                                                               |                                                                                                                                                                                                                                                                                                                        |
| 222675_s_at, 227372_s_at, 240522_at, 227371_at, 222676_at                              | bai1-associated protein 2-like 1                                                                                                                                                                                                                                                                                       |
| 200043_at                                                                              | enhancer of rudimentary homolog (drosophila)                                                                                                                                                                                                                                                                           |
| 204674_at, 35974_at, 240718_at                                                         | lymphoid-restricted membrane protein                                                                                                                                                                                                                                                                                   |
| 200097_s_at, 200775_s_at                                                               | heterogeneous nuclear ribonucleoprotein k                                                                                                                                                                                                                                                                              |
| 227877_at                                                                              | similar to annexin ii receptor                                                                                                                                                                                                                                                                                         |
| 204194_at, 234315_at, 210818_s_at, 234938_at                                           | btb and cnc homology 1, basic leucine zipper transcription factor 1                                                                                                                                                                                                                                                    |
| 1552661_at, 205717_x_at, 211066_x_at, 215836_s_at, 209079_x_at, 1552662_a_at           | protocadherin gamma subfamily b, 7                                                                                                                                                                                                                                                                                     |
| 217634_at                                                                              | similar to supervillin isoform 2; membrane-associated f-actin binding protein p205; archvillin                                                                                                                                                                                                                         |
| 208868_s_at, 208869_s_at                                                               | gaba(a) receptor-associated protein like 1                                                                                                                                                                                                                                                                             |
| 228324_at, 243646_at, 241781_at                                                        | chromosome 9 open reading frame 41                                                                                                                                                                                                                                                                                     |
| 204420_at                                                                              | fos-like antigen 1                                                                                                                                                                                                                                                                                                     |
| 216244_at, 216243_s_at, 216245_at, 212659_s_at                                         | interleukin 1 receptor antagonist                                                                                                                                                                                                                                                                                      |
| 239103_at                                                                              | ,consensus includes gb:aw292424 /fea=est /db_xref=gi:6699060 /db_xref=est:ui-h-bi2-agp-a-07-0-ui.s1 /clone=image:2724781 /ug=hs.134025 ests,gb:aw292424 /db_xref=gi:6699060 /db_xref=ui-h-bi2-agp-a-07-0-ui.s1 /clone=image:2724781 /fea=est /cnt=5 /tid=hs.134025.0 /tier=consend /stk=4 /ug=hs.134025 /ug_title=ests |
| 207156_at, 214542_x_at, 214554_at, 208583_x_at                                         | histone 1, h2ai                                                                                                                                                                                                                                                                                                        |
| 1553502_a_at, 202759_s_at, 1554640_at, 202760_s_at, 226694_at                          | a kinase (prka) anchor protein 2                                                                                                                                                                                                                                                                                       |
| 210074_at                                                                              | cathepsin l2                                                                                                                                                                                                                                                                                                           |
| 218459_at, 233851_s_at                                                                 | torsin family 3, member a                                                                                                                                                                                                                                                                                              |
| 212374_at                                                                              | fem-1 homolog b (c. elegans)                                                                                                                                                                                                                                                                                           |
| 218116_at                                                                              | hypothetical protein hspc220                                                                                                                                                                                                                                                                                           |
| 1557637_at, 1562467_at, 202425_x_at, 1560552_a_at, 202429_s_at, 236545_at, 202457_s_at | protein phosphatase 3 (formerly 2b), catalytic subunit, alpha isoform (calcineurin a alpha)                                                                                                                                                                                                                            |
| 239220_at                                                                              | ,consensus includes gb:aa449026 /fea=est /db_xref=gi:2163046 /db_xref=est:zx07e03.r1 /clone=image:785788 /ug=hs.57773 ests,gb:aa449026 /db_xref=gi:2163046 /db_xref=zx07e03.r1                                                                                                                                         |

|                                                       |                                                                                                      |
|-------------------------------------------------------|------------------------------------------------------------------------------------------------------|
|                                                       | /clone=image:785788 /fea=est /cnt=8 /tid=hs.57773.0 /tier=consend /stk=0 /ug=hs.57773 /ug_title=ests |
| 227192_at                                             | proline-rich transmembrane protein 2                                                                 |
| 1553111_a_at                                          | kelch repeat and btb (poz) domain containing 6                                                       |
| 203108_at                                             | g protein-coupled receptor, family c, group 5, member a                                              |
| 212288_at,<br>243876_at,<br>213940_s_at,<br>230086_at | 244286_at,<br>239453_at,<br>230389_at,<br>formin binding protein 1                                   |
| 207022_s_at                                           | lactate dehydrogenase c                                                                              |
| 203316_s_at,<br>231112_at                             | 215450_at,<br>small nuclear ribonucleoprotein polypeptide e                                          |
| 211012_s_at, 211014_s_at                              | hypothetical protein loc161527                                                                       |
| 1559011_at                                            | flj13773                                                                                             |
| 226261_at, 229188_s_at                                | zinc and ring finger 2                                                                               |
| 224262_at                                             | interleukin 1 family, member 10 (theta)                                                              |
| 220149_at                                             | hypothetical protein flj22671                                                                        |
| 223796_at, 231464_at                                  | contactin associated protein-like 3                                                                  |
| 227457_at                                             | dda1                                                                                                 |
| 214693_x_at,<br>226740_x_at, 215434_x_at              | 229447_x_at,<br>neuroblastoma breakpoint family, member 14                                           |
| 239078_at, 241908_at                                  | chromosome 1 open reading frame 58                                                                   |
| 201215_at                                             | plastin 3 (t isoform)                                                                                |
| 217820_s_at,<br>222434_at, 228553_at, 228310_at       | 222433_at,<br>enabled homolog (drosophila)                                                           |
| 238469_at                                             | opioid growth factor receptor-like 1                                                                 |
| 206487_at,<br>230210_at, 214169_at                    | 212074_at,<br>unc-84 homolog a (c. elegans)                                                          |
| 215043_s_at                                           | sma5                                                                                                 |
| 204499_at,<br>204500_s_at                             | 237141_x_at,<br>atp/gtp binding protein 1                                                            |
| 209818_s_at,<br>233919_s_at, 209819_at                | 232341_x_at,<br>hyaluronan binding protein 4                                                         |
| 230953_at                                             | hypothetical protein                                                                                 |
| 225119_at, 225498_at                                  | chromatin modifying protein 4b                                                                       |
| 1559360_at, 207301_at                                 | ephrin-a5                                                                                            |
| 243280_at                                             | similar to line-1 reverse transcriptase homolog                                                      |
| 1552315_at,<br>236401_at, 1552318_at                  | 1552316_a_at,<br>gtpase, imap family member 1                                                        |
| 232300_at                                             | chromosome 10 open reading frame 116                                                                 |

|                                                                                       |                                                                                                                                                                                                                                                                                                                                                                                                               |
|---------------------------------------------------------------------------------------|---------------------------------------------------------------------------------------------------------------------------------------------------------------------------------------------------------------------------------------------------------------------------------------------------------------------------------------------------------------------------------------------------------------|
| 223095_at, 234917_at                                                                  | marvel domain containing 1                                                                                                                                                                                                                                                                                                                                                                                    |
| 209710_at, 210358_x_at                                                                | gata binding protein 2                                                                                                                                                                                                                                                                                                                                                                                        |
| 208354_s_at, 215274_at, 244477_at                                                     | solute carrier family 12 (sodium/chloride transporters), member 3                                                                                                                                                                                                                                                                                                                                             |
| 202708_s_at                                                                           | histone 1, h2bb                                                                                                                                                                                                                                                                                                                                                                                               |
| 221156_x_at, 221511_x_at, 222156_x_at                                                 | cell cycle progression 1                                                                                                                                                                                                                                                                                                                                                                                      |
| 1555326_a_at, 202381_at, 1570042_a_at                                                 | adam metalloproteinase domain 9 (meltrin gamma)                                                                                                                                                                                                                                                                                                                                                               |
| 208685_x_at, 214911_s_at, 208686_s_at                                                 | bromodomain containing 2                                                                                                                                                                                                                                                                                                                                                                                      |
| 1557073_s_at, 226964_at, 240011_at, 213922_at, 1554295_x_at, 1554294_s_at, 1554293_at | kiaa0847 protein                                                                                                                                                                                                                                                                                                                                                                                              |
| 238932_at                                                                             | ,consensus includes gb:aa810263 /fea=est /db_xref=gi:2879622 /db_xref=est:od14e12.s1 /clone=image:1367950 /ug=hs.41272 ests, weakly similar to e41925 hypothetical protein 3 h.sapiens,gb:aa810263 /db_xref=gi:2879622 /db_xref=od14e12.s1 /clone=image:1367950 /fea=est /cnt=7 /tid=hs.41272.1 /tier=consend /stk=1 /ug=hs.41272 /ug_title=ests, weakly similar to e41925 hypothetical protein 3 (h.sapiens) |
| 1565974_at, 242646_at, 243105_at, 222759_at, 1565975_at, 218242_s_at                  | suppressor of variegation 4-20 homolog 1 (drosophila)                                                                                                                                                                                                                                                                                                                                                         |
| 224097_s_at, 221664_s_at, 223000_s_at, 226482_s_at                                    | f11 receptor                                                                                                                                                                                                                                                                                                                                                                                                  |
| 1565669_at                                                                            | high-mobility group nucleosomal binding domain 2                                                                                                                                                                                                                                                                                                                                                              |
| 202776_at                                                                             | deoxynucleotidyltransferase, terminal, interacting protein 2                                                                                                                                                                                                                                                                                                                                                  |
| 224117_at                                                                             | hypothetical gene supported by bc001801                                                                                                                                                                                                                                                                                                                                                                       |
| 221951_at, 65630_at                                                                   | transmembrane protein 80                                                                                                                                                                                                                                                                                                                                                                                      |
| 210275_s_at, 217741_s_at, 229368_s_at, 228317_at                                      | zinc finger, a20 domain containing 2                                                                                                                                                                                                                                                                                                                                                                          |
| 244666_at                                                                             | grb2-related adaptor protein                                                                                                                                                                                                                                                                                                                                                                                  |
| 1559600_at                                                                            | hypothetical protein loc220686                                                                                                                                                                                                                                                                                                                                                                                |
| 209806_at                                                                             | histone 1, h2bk                                                                                                                                                                                                                                                                                                                                                                                               |
| 1554052_at, 200860_s_at, 200861_at                                                    | ccr4-not transcription complex, subunit 1                                                                                                                                                                                                                                                                                                                                                                     |
| 206194_at                                                                             | homeobox c4                                                                                                                                                                                                                                                                                                                                                                                                   |
| 201912_s_at, 240452_at, 215438_x_at                                                   | g1 to s phase transition 1                                                                                                                                                                                                                                                                                                                                                                                    |

|                                            |                                                                                                                                                                                                                                                                                            |
|--------------------------------------------|--------------------------------------------------------------------------------------------------------------------------------------------------------------------------------------------------------------------------------------------------------------------------------------------|
| 228293_at                                  | novel 58.3 kda protein                                                                                                                                                                                                                                                                     |
| 206604_at, 229396_at                       | ovo-like 1(drosophila)                                                                                                                                                                                                                                                                     |
| 213138_at                                  | at rich interactive domain 5a (mrf1-like)                                                                                                                                                                                                                                                  |
| 236626_at                                  | family with sequence similarity 86, member a                                                                                                                                                                                                                                               |
| 204948_s_at, 226847_at, 207345_at          | follistatin                                                                                                                                                                                                                                                                                |
| 232449_at                                  | 6-pyruvoyltetrahydropterin synthase                                                                                                                                                                                                                                                        |
| 221128_at, 209765_at, 234641_at, 234208_at | adam metallopeptidase domain 19 (meltrin beta)                                                                                                                                                                                                                                             |
| 238258_at                                  | williams-beuren syndrome critical region 28                                                                                                                                                                                                                                                |
| 201300_s_at, 215707_s_at                   | prion protein (p27-30) (creutzfeld-jakob disease, gerstmann-strausler-scheinker syndrome, fatal familial insomnia)                                                                                                                                                                         |
| 218370_s_at, 222610_s_at                   | s100p binding protein                                                                                                                                                                                                                                                                      |
| 208469_s_at, 209490_s_at, 230054_at        | palmitoyl-protein thioesterase 2                                                                                                                                                                                                                                                           |
| 203143_s_at, 203144_s_at                   | kiaa0040                                                                                                                                                                                                                                                                                   |
| 200872_at, 238909_at                       | s100 calcium binding protein a10 (annexin ii ligand, calpactin i, light polypeptide (p11))                                                                                                                                                                                                 |
| 242537_at                                  | 6-phosphogluconolactonase                                                                                                                                                                                                                                                                  |
| 218998_at                                  | chromosome 9 open reading frame 6                                                                                                                                                                                                                                                          |
| 212010_s_at, 213554_s_at, 213548_s_at      | cdv3 homolog (mouse)                                                                                                                                                                                                                                                                       |
| 203339_at, 203340_s_at                     | solute carrier family 25 (mitochondrial carrier, aralar), member 12                                                                                                                                                                                                                        |
| 210993_s_at, 227798_at, 244446_at          | smad, mothers against dpp homolog 1 (drosophila)                                                                                                                                                                                                                                           |
| 219623_at                                  | arp5 actin-related protein 5 homolog (yeast)                                                                                                                                                                                                                                               |
| 205157_s_at                                | keratin 17                                                                                                                                                                                                                                                                                 |
| 224806_at, 206911_at                       | tripartite motif-containing 25                                                                                                                                                                                                                                                             |
| 203287_at                                  | ladinin 1                                                                                                                                                                                                                                                                                  |
| 204760_s_at, 31637_s_at                    | thyroid hormone receptor, alpha (erythroblastic leukemia viral (v-erb-a) oncogene homolog, avian)                                                                                                                                                                                          |
| 239709_at                                  | ,consensus includes gb:bf194875 /fea=est /db_xref=gi:11081147 /db_xref=est:7o89f12.x1 /clone=image:3643558 /ug=hs.243596 ests,gb:bf194875 /db_xref=gi:11081147 /db_xref=7o89f12.x1 /clone=image:3643558 /fea=est /cnt=4 /tid=hs.243596.0 /tier=consend /stk=4 /ug=hs.243596 /ug_title=ests |
| 225557_at, 243326_at                       | axin1 up-regulated 1                                                                                                                                                                                                                                                                       |
| 238920_at                                  | chromosome 20 open reading frame 11                                                                                                                                                                                                                                                        |
| 200965_s_at, 210461_s_at                   | actin binding lim protein 1                                                                                                                                                                                                                                                                |
| 238873_at                                  | chromosome 18 open reading frame 8                                                                                                                                                                                                                                                         |

|                                                                                                       |                                                                                                                                                                                                                                                |
|-------------------------------------------------------------------------------------------------------|------------------------------------------------------------------------------------------------------------------------------------------------------------------------------------------------------------------------------------------------|
| 1566464_at, 1566465_at,<br>204679_at, 204678_s_at                                                     | potassium channel, subfamily k, member 1                                                                                                                                                                                                       |
| 1553581_s_at, 235390_at                                                                               | p18srp protein                                                                                                                                                                                                                                 |
| 1560059_at, 219053_s_at,<br>1560060_s_at                                                              | vacuolar protein sorting 37c (yeast)                                                                                                                                                                                                           |
| 219922_s_at, 237144_at,<br>227308_x_at                                                                | latent transforming growth factor beta binding protein 3                                                                                                                                                                                       |
| 204734_at                                                                                             | keratin 15                                                                                                                                                                                                                                     |
| 213139_at                                                                                             | snail homolog 2 (drosophila)                                                                                                                                                                                                                   |
| 1553831_at                                                                                            | apolipoprotein b mrna editing enzyme, catalytic polypeptide-like 3d (putative)                                                                                                                                                                 |
| 210239_at                                                                                             | iroquois homeobox protein 5                                                                                                                                                                                                                    |
| 235632_at, 237406_at, 239267_at                                                                       | proteasome (prosome, macropain) subunit, beta type, 7                                                                                                                                                                                          |
| 238638_at                                                                                             | solute carrier family 37 (glycerol-3-phosphate transporter), member 2                                                                                                                                                                          |
| 1558867_at, 1558868_a_at,<br>218854_at                                                                | squamous cell carcinoma antigen recognized by t cells 2                                                                                                                                                                                        |
| 202930_s_at                                                                                           | succinate-coa ligase, adp-forming, beta subunit                                                                                                                                                                                                |
| 205355_at, 226030_at                                                                                  | acyl-coenzyme a dehydrogenase, short/branched chain                                                                                                                                                                                            |
| 200896_x_at                                                                                           | hepatoma-derived growth factor (high-mobility group protein 1-like)                                                                                                                                                                            |
| 233690_at                                                                                             | chromosome 21 open reading frame 96                                                                                                                                                                                                            |
| 239354_at                                                                                             | ,consensus includes gb:c20606 /fea=est /db_xref=gi:1621716 /db_xref=est:humgs0004600 /ug=hs.250718 ests,gb:c20606 /db_xref=gi:1621716 /db_xref=humgs0004600 /fea=est /cnt=7 /tid=hs.250718.0 /tier=consend /stk=1 /ug=hs.250718 /ug_title=ests |
| 210689_at                                                                                             | claudin 14                                                                                                                                                                                                                                     |
| 221215_s_at                                                                                           | receptor-interacting serine-threonine kinase 4                                                                                                                                                                                                 |
| 235025_at, 238650_x_at,<br>244038_at                                                                  | chromosome 14 open reading frame 150                                                                                                                                                                                                           |
| 201473_at                                                                                             | jun b proto-oncogene                                                                                                                                                                                                                           |
| 223663_at                                                                                             | hypothetical protein dkfzp434g0920                                                                                                                                                                                                             |
| 1568882_at, 217706_at,<br>226717_at                                                                   | leucine rich repeat containing 51                                                                                                                                                                                                              |
| 209681_at                                                                                             | solute carrier family 19 (thiamine transporter), member 2                                                                                                                                                                                      |
| 215504_x_at, 241414_at,<br>239116_at, 235008_at,<br>227260_at, 218093_s_at,<br>226663_at, 223251_s_at | ankyrin repeat domain 10                                                                                                                                                                                                                       |
| 1559206_at, 1567443_x_at,<br>242875_at, 1567440_at                                                    | presenilin 1 (alzheimer disease 3)                                                                                                                                                                                                             |
| 1553194_at, 239548_at,<br>243357_at, 229461_x_at,                                                     | neuronal growth regulator 1                                                                                                                                                                                                                    |



|                                                                                                     |                                                                                                                                                                                                                                                                                          |
|-----------------------------------------------------------------------------------------------------|------------------------------------------------------------------------------------------------------------------------------------------------------------------------------------------------------------------------------------------------------------------------------------------|
| 1563316_at                                                                                          |                                                                                                                                                                                                                                                                                          |
| 228575_at                                                                                           | fibronectin type iii domain containing 6                                                                                                                                                                                                                                                 |
| 203597_s_at, 203599_s_at,<br>203598_s_at                                                            | ww domain binding protein 4 (formin binding protein 21)                                                                                                                                                                                                                                  |
| 212925_at                                                                                           | chromosome 19 open reading frame 21                                                                                                                                                                                                                                                      |
| 201067_at, 201068_s_at                                                                              | proteasome (prosome, macropain) 26s subunit, atpase, 2                                                                                                                                                                                                                                   |
| 207428_x_at, 210474_s_at,<br>212401_s_at, 211289_x_at                                               | cell division cycle 2-like 1 (pitslre proteins)                                                                                                                                                                                                                                          |
| 1566248_at, 1569208_a_at,<br>212327_at, 232457_at,<br>244554_at, 241459_at,<br>212328_at, 212325_at | hypothetical protein                                                                                                                                                                                                                                                                     |
| 1320_at, 40524_at, 226380_at,<br>1556706_at, 222092_at,<br>205438_at                                | protein tyrosine phosphatase, non-receptor type 21                                                                                                                                                                                                                                       |
| 226832_at                                                                                           | hypothetical loc389188                                                                                                                                                                                                                                                                   |
| 218802_at                                                                                           | hypothetical protein flj20647                                                                                                                                                                                                                                                            |
| 208557_at, 239915_at                                                                                | homeobox a6                                                                                                                                                                                                                                                                              |
| 219290_x_at, 240647_at,<br>222858_s_at, 236707_at,<br>222859_s_at                                   | dual adaptor of phosphotyrosine and 3-phosphoinositides                                                                                                                                                                                                                                  |
| 221232_s_at                                                                                         | ankyrin repeat domain 2 (stretch responsive muscle)                                                                                                                                                                                                                                      |
| 202853_s_at, 216976_s_at,<br>238210_at, 214172_x_at                                                 | ryk receptor-like tyrosine kinase                                                                                                                                                                                                                                                        |
| 240196_at                                                                                           | ,consensus includes gb:av758315 /fea=est /db_xref=gi:10916163<br>/db_xref=est:av758315 /clone=bmfarg10 /ug=hs.129115<br>ests,gb:av758315 /db_xref=gi:10916163 /db_xref=av758315<br>/clone=bmfarg10 /fea=est /cnt=8 /tid=hs.129115.0 /tier=consend<br>/stk=0 /ug=hs.129115 /ug_title=ests |
| 242933_at                                                                                           | high-mobility group box 4                                                                                                                                                                                                                                                                |
| 205717_x_at, 215836_s_at,<br>209079_x_at, 211880_x_at,<br>211066_x_at                               | protocadherin gamma subfamily a, 1                                                                                                                                                                                                                                                       |
| 208949_s_at                                                                                         | galectin-3 internal gene                                                                                                                                                                                                                                                                 |
| 1554711_at                                                                                          | family with sequence similarity 26, member a                                                                                                                                                                                                                                             |
| 208620_at                                                                                           | poly(rc) binding protein 1                                                                                                                                                                                                                                                               |
| 219412_at, 234666_at, 234188_at                                                                     | rab38, member ras oncogene family                                                                                                                                                                                                                                                        |
| 221772_s_at, 225066_at                                                                              | protein phosphatase 2, regulatory subunit b, delta isoform                                                                                                                                                                                                                               |
| 208091_s_at, 241010_x_at,<br>238976_at                                                              | egfr-coamplified and overexpressed protein                                                                                                                                                                                                                                               |
| 1552719_at, 1570639_at,                                                                             | cancer susceptibility candidate 4                                                                                                                                                                                                                                                        |

|                                                                                             |                                                                                                                                                                                                                                                                                          |
|---------------------------------------------------------------------------------------------|------------------------------------------------------------------------------------------------------------------------------------------------------------------------------------------------------------------------------------------------------------------------------------------|
| 224619_at, 1561644_x_at, 1559635_at                                                         |                                                                                                                                                                                                                                                                                          |
| 203722_at, 211552_s_at                                                                      | aldehyde dehydrogenase 4 family, member a1                                                                                                                                                                                                                                               |
| 203802_x_at, 213773_x_at                                                                    | nol1/nop2/sun domain family, member 5                                                                                                                                                                                                                                                    |
| 218195_at                                                                                   | chromosome 6 open reading frame 211                                                                                                                                                                                                                                                      |
| 214580_x_at                                                                                 | keratin 6a                                                                                                                                                                                                                                                                               |
| 236348_at                                                                                   | david_3253259                                                                                                                                                                                                                                                                            |
| 203797_at, 203798_s_at                                                                      | visinin-like 1                                                                                                                                                                                                                                                                           |
| 207899_at                                                                                   | gastric inhibitory polypeptide                                                                                                                                                                                                                                                           |
| 224650_at                                                                                   | mal, t-cell differentiation protein 2                                                                                                                                                                                                                                                    |
| 218826_at                                                                                   | solute carrier family 35, member f2                                                                                                                                                                                                                                                      |
| 204126_s_at                                                                                 | cdc45 cell division cycle 45-like (s. cerevisiae)                                                                                                                                                                                                                                        |
| 1553105_s_at, 217901_at                                                                     | desmoglein 2                                                                                                                                                                                                                                                                             |
| 209204_at, 227155_at, 229537_at, 209205_s_at, 241922_at                                     | lim domain only 4                                                                                                                                                                                                                                                                        |
| 221107_at                                                                                   | cholinergic receptor, nicotinic, alpha 9                                                                                                                                                                                                                                                 |
| 1570169_at, 1557143_at                                                                      | cub and sushi multiple domains 2                                                                                                                                                                                                                                                         |
| 207622_s_at, 214232_at, 207623_at, 209247_s_at, 209246_at                                   | atp-binding cassette, sub-family f (gcn20), member 2                                                                                                                                                                                                                                     |
| 203253_s_at                                                                                 | histidine acid phosphatase domain containing 1                                                                                                                                                                                                                                           |
| 236583_at                                                                                   | ,consensus includes gb:aa286867 /fea=est /db_xref=gi:1933927 /db_xref=est:zs56c05.s1 /clone=image:701480 /ug=hs.99693 ests,gb:aa286867 /db_xref=gi:1933927 /db_xref=zs56c05.s1 /clone=image:701480 /fea=est /cnt=6 /tid=hs.99693.0 /tier=consend /stk=6 /ug=hs.99693 /ug_title=ests      |
| 1569583_at, 205767_at                                                                       | epiregulin                                                                                                                                                                                                                                                                               |
| 220199_s_at                                                                                 | chromosome 1 open reading frame 80                                                                                                                                                                                                                                                       |
| 210152_at                                                                                   | leukocyte immunoglobulin-like receptor, subfamily b (with tm and itim domains), member 4                                                                                                                                                                                                 |
| 236391_at                                                                                   | xk, kell blood group complex subunit-related family, member 7                                                                                                                                                                                                                            |
| 1554511_at, 213085_s_at, 216074_x_at, 233352_at, 237238_at, 243290_at, 236725_at, 229180_at | ww, c2 and coiled-coil domain containing 1                                                                                                                                                                                                                                               |
| 236650_at                                                                                   | ,consensus includes gb:ai703450 /fea=est /db_xref=gi:4991350 /db_xref=est:we24d05.x1 /clone=image:2342025 /ug=hs.202243 ests,gb:ai703450 /db_xref=gi:4991350 /db_xref=we24d05.x1 /clone=image:2342025 /fea=est /cnt=6 /tid=hs.202243.0 /tier=consend /stk=6 /ug=hs.202243 /ug_title=ests |

|                                                                                     |                                                                               |
|-------------------------------------------------------------------------------------|-------------------------------------------------------------------------------|
| 209103_s_at                                                                         | ubiquitin fusion degradation 1 like (yeast)                                   |
| 205596_s_at, 216444_at,<br>230820_at, 238391_at,<br>241900_at, 238394_at, 232020_at | smad specific e3 ubiquitin protein ligase 2                                   |
| 223169_s_at                                                                         | ras homolog gene family, member u                                             |
| 1569916_at, 206376_at,<br>239352_at, 240419_at, 232263_at                           | solute carrier family 6, member 15                                            |
| 201474_s_at                                                                         | integrin, alpha 3 (antigen cd49c, alpha 3 subunit of vla-3 receptor)          |
| 209934_s_at, 212255_s_at,<br>230387_at, 211137_s_at,<br>209935_at                   | atpase, ca++ transporting, type 2c, member 1                                  |
| 206112_at                                                                           | ankyrin repeat domain 7                                                       |
| 200904_at, 200905_x_at,<br>217456_x_at                                              | major histocompatibility complex, class i, e                                  |
| 1560147_at, 242452_at,<br>235246_at                                                 | loc441300                                                                     |
| 1569431_at, 210160_at                                                               | platelet-activating factor acetylhydrolase, isoform ib, beta subunit<br>30kda |
| 209148_at, 215099_s_at,<br>215098_at                                                | retinoid x receptor, beta                                                     |
| 225320_at                                                                           | hypothetical protein flj21463                                                 |
| 206596_s_at, 206597_at                                                              | neural retina leucine zipper                                                  |
| 201435_s_at, 237718_at,<br>201437_s_at, 201436_at                                   | eukaryotic translation initiation factor 4e                                   |
| 204614_at                                                                           | serpin peptidase inhibitor, clade b (ovalbumin), member 2                     |
| 204711_at                                                                           | kiaa0753                                                                      |
| 241135_at                                                                           | hypothetical loc401385                                                        |
| 1554646_at, 241693_at,<br>208158_s_at, 209485_s_at                                  | oxysterol-binding protein-related protein 1                                   |
| 1552628_a_at, 1556239_a_at,<br>1558699_a_at, 1556238_at,<br>222751_at               | hypothetical protein flj22313                                                 |
| 56256_at                                                                            | sid1 transmembrane family, member 2                                           |
| 221865_at                                                                           | chromosome 9 open reading frame 91                                            |
| 1569421_at, 201428_at                                                               | claudin 4                                                                     |
| 203592_s_at, 241921_x_at                                                            | follistatin-like 3 (secreted glycoprotein)                                    |
| 227249_at, 228134_at,<br>228133_s_at                                                | myosin, heavy polypeptide 11, smooth muscle                                   |
| 201142_at, 201144_s_at,<br>201143_s_at                                              | eukaryotic translation initiation factor 2, subunit 1 alpha, 35kda            |
| 209173_at, 228969_at                                                                | anterior gradient 2 homolog (xenopus laevis)                                  |

|                                                                        |                                                           |                                                                                                                                                                                                                                                                                          |
|------------------------------------------------------------------------|-----------------------------------------------------------|------------------------------------------------------------------------------------------------------------------------------------------------------------------------------------------------------------------------------------------------------------------------------------------|
| 1553191_at,<br>204455_at,<br>215810_x_at,<br>215814_at,<br>212253_x_at | 1563797_at,<br>212254_s_at,<br>220154_at,<br>215016_x_at, | dystonin                                                                                                                                                                                                                                                                                 |
| 221890_at, 78330_at, 222059_at                                         |                                                           | zinc finger protein 335                                                                                                                                                                                                                                                                  |
| 208937_s_at                                                            |                                                           | inhibitor of dna binding 1, dominant negative helix-loop-helix protein                                                                                                                                                                                                                   |
| 236501_at                                                              |                                                           | ,consensus includes gb:ai279296 /fea=est /db_xref=gi:3917530 /db_xref=est:qm24h01.x1 /clone=image:1882801 /ug=hs.149458 ests,gb:ai279296 /db_xref=gi:3917530 /db_xref=qm24h01.x1 /clone=image:1882801 /fea=est /cnt=7 /tid=hs.149458.0 /tier=consend /stk=6 /ug=hs.149458 /ug_title=ests |
| 219490_s_at,<br>236221_at                                              | 222889_at,                                                | dna cross-link repair 1b (pso2 homolog, s. cerevisiae)                                                                                                                                                                                                                                   |
| 219361_s_at                                                            |                                                           | interferon stimulated exonuclease gene 20kda-like 1                                                                                                                                                                                                                                      |
| 225283_at                                                              |                                                           | arrestin domain containing 4                                                                                                                                                                                                                                                             |
| 1558678_s_at,<br>224568_x_at,<br>226675_s_at, 228582_x_at              | 224567_x_at,<br>224558_s_at,                              | metastasis associated lung adenocarcinoma transcript 1 (non-coding rna)                                                                                                                                                                                                                  |
| 214740_at,<br>216242_x_at                                              | 228823_at,                                                | dna directed rna polymerase ii polypeptide j-related gene                                                                                                                                                                                                                                |
| 200606_at, 240382_at                                                   |                                                           | desmoplakin                                                                                                                                                                                                                                                                              |
| 1554757_a_at,<br>1561733_at                                            | 203006_at,                                                | inositol polyphosphate-5-phosphatase, 40kda                                                                                                                                                                                                                                              |
| 205349_at                                                              |                                                           | guanine nucleotide binding protein (g protein), alpha 15 (gq class)                                                                                                                                                                                                                      |
| 201534_s_at,<br>201535_at                                              | 243072_at,                                                | ubiquitin-like 3                                                                                                                                                                                                                                                                         |
| 229804_x_at                                                            |                                                           | hypothetical protein from clone 1659351                                                                                                                                                                                                                                                  |
| 208864_s_at, 216609_at                                                 |                                                           | thioredoxin                                                                                                                                                                                                                                                                              |
| 228609_at                                                              |                                                           | loc440545                                                                                                                                                                                                                                                                                |
| 1553642_at                                                             |                                                           | hypothetical protein flj36779                                                                                                                                                                                                                                                            |
| 205847_at                                                              |                                                           | protease, serine, 22                                                                                                                                                                                                                                                                     |
| 237092_at                                                              |                                                           | ,consensus includes gb:ai198906 /fea=est /db_xref=gi:3751512 /db_xref=est:qf55b10.x1 /clone=image:1753915 /ug=hs.148452 ests,gb:ai198906 /db_xref=gi:3751512 /db_xref=qf55b10.x1 /clone=image:1753915 /fea=est /cnt=6 /tid=hs.148452.0 /tier=consend /stk=5 /ug=hs.148452 /ug_title=ests |
| 218744_s_at                                                            |                                                           | protein kinase c and casein kinase substrate in neurons 3                                                                                                                                                                                                                                |
| 202153_s_at,<br>236505_at                                              | 207740_s_at,                                              | nucleoporin 62kda                                                                                                                                                                                                                                                                        |
| 1554728_at, 209453_at                                                  |                                                           | solute carrier family 9 (sodium/hydrogen exchanger), member 1                                                                                                                                                                                                                            |

|                                                                                                                                         |                                                                                                                                                                                                                                                                                                                                       |
|-----------------------------------------------------------------------------------------------------------------------------------------|---------------------------------------------------------------------------------------------------------------------------------------------------------------------------------------------------------------------------------------------------------------------------------------------------------------------------------------|
|                                                                                                                                         | (antiporter, na+/h+, amiloride sensitive)                                                                                                                                                                                                                                                                                             |
| 218325_s_at, 227335_at,<br>239075_at, 222595_s_at                                                                                       | death inducer-obliterator 1                                                                                                                                                                                                                                                                                                           |
| 205062_x_at, 244566_at                                                                                                                  | at rich interactive domain 4a (rbp1-like)                                                                                                                                                                                                                                                                                             |
| 229582_at                                                                                                                               | chromosome 18 open reading frame 37                                                                                                                                                                                                                                                                                                   |
| 1552971_at                                                                                                                              | sarcoglycan zeta                                                                                                                                                                                                                                                                                                                      |
| 1558093_s_at, 1564907_s_at,<br>1564911_at, 1564906_at,<br>1565325_at, 200626_s_at,<br>238993_at, 242260_at,<br>214363_s_at, 200624_s_at | matrin 3                                                                                                                                                                                                                                                                                                                              |
| 241886_x_at                                                                                                                             | loc440115                                                                                                                                                                                                                                                                                                                             |
| 221347_at                                                                                                                               | cholinergic receptor, muscarinic 5                                                                                                                                                                                                                                                                                                    |
| 218396_at, 220517_at,<br>235023_at, 232386_at                                                                                           | vacuolar protein sorting 13c (yeast)                                                                                                                                                                                                                                                                                                  |
| 200693_at, 212426_s_at                                                                                                                  | tyrosine 3-monooxygenase/tryptophan 5-monooxygenase activation protein, theta polypeptide                                                                                                                                                                                                                                             |
| 207589_at                                                                                                                               | adrenergic, alpha-1b-, receptor                                                                                                                                                                                                                                                                                                       |
| 216782_at                                                                                                                               | similar to sperm protein ssp411                                                                                                                                                                                                                                                                                                       |
| 214469_at                                                                                                                               | histone 1, h2ae                                                                                                                                                                                                                                                                                                                       |
| 205717_x_at, 211066_x_at,<br>211876_x_at, 209079_x_at,<br>215836_s_at                                                                   | protocadherin gamma subfamily a, 6                                                                                                                                                                                                                                                                                                    |
| 210958_s_at, 225613_at,<br>40016_g_at, 225611_at,<br>222348_at                                                                          | microtubule associated serine/threonine kinase family member 4                                                                                                                                                                                                                                                                        |
| 226154_at                                                                                                                               | tyrosyl-trna synthetase 2 (mitochondrial)                                                                                                                                                                                                                                                                                             |
| 204494_s_at, 204495_s_at                                                                                                                | dkfzp434h132 protein                                                                                                                                                                                                                                                                                                                  |
| 222013_x_at                                                                                                                             | amyloid beta (a4) precursor protein (peptidase nexin-ii, alzheimer disease)                                                                                                                                                                                                                                                           |
| 1554010_at, 202608_s_at,<br>202607_at                                                                                                   | n-deacetylase/n-sulfotransferase (heparan glucosaminyl) 1                                                                                                                                                                                                                                                                             |
| 237290_at                                                                                                                               | ,consensus includes gb:aw138872 /fea=est /db_xref=gi:6143190<br>/db_xref=est:ui-h-bi1-aeq-b-11-0-ui.s1 /clone=image:2720204<br>/ug=hs.135288 ests.gb:aw138872 /db_xref=gi:6143190<br>/db_xref=ui-h-bi1-aeq-b-11-0-ui.s1 /clone=image:2720204 /fea=est<br>/cnt=7 /tid=hs.135288.0 /tier=consend /stk=5 /ug=hs.135288<br>/ug_title=ests |
| 201829_at, 201830_s_at                                                                                                                  | neuroepithelial cell transforming gene 1                                                                                                                                                                                                                                                                                              |
| 214253_s_at, 215565_at,<br>215295_at, 233521_at, 233727_at                                                                              | dystrobrevin, beta                                                                                                                                                                                                                                                                                                                    |

|                                                                                                                                   |                                                                                                                                                                                                                                                                                                      |
|-----------------------------------------------------------------------------------------------------------------------------------|------------------------------------------------------------------------------------------------------------------------------------------------------------------------------------------------------------------------------------------------------------------------------------------------------|
| 201281_at                                                                                                                         | adhesion regulating molecule 1                                                                                                                                                                                                                                                                       |
| 218258_at                                                                                                                         | polymerase (rna) i polypeptide d, 16kda                                                                                                                                                                                                                                                              |
| 202146_at, 202147_s_at                                                                                                            | interferon-related developmental regulator 1                                                                                                                                                                                                                                                         |
| 205375_at                                                                                                                         | myod family inhibitor                                                                                                                                                                                                                                                                                |
| 209407_s_at, 230059_at                                                                                                            | deformed epidermal autoregulatory factor 1 (drosophila)                                                                                                                                                                                                                                              |
| 1557944_s_at, 238884_at,<br>208407_s_at, 208862_s_at                                                                              | catenin (cadherin-associated protein), delta 1                                                                                                                                                                                                                                                       |
| 214457_at                                                                                                                         | homeobox a2                                                                                                                                                                                                                                                                                          |
| 208604_s_at, 235521_at                                                                                                            | homeobox a3                                                                                                                                                                                                                                                                                          |
| 210892_s_at, 229896_at,<br>201065_s_at, 210891_s_at                                                                               | general transcription factor ii, i                                                                                                                                                                                                                                                                   |
| 206754_s_at, 210272_at                                                                                                            | cytochrome p450, family 2, subfamily b, polypeptide 7 pseudogene 1                                                                                                                                                                                                                                   |
| 202704_at, 228834_at                                                                                                              | transducer of erb2, 1                                                                                                                                                                                                                                                                                |
| 236869_at                                                                                                                         | ,consensus includes gb:ai857429 /fea=est /db_xref=gi:5511045<br>/db_xref=est:w157b01.x1 /clone=image:2428969 /ug=hs.171171<br>ests,gb:ai857429 /db_xref=gi:5511045 /db_xref=w157b01.x1<br>/clone=image:2428969 /fea=est /cnt=6 /tid=hs.171171.0 /tier=consend<br>/stk=5 /ug=hs.171171 /ug_title=ests |
| 200789_at                                                                                                                         | enoyl coenzyme a hydratase 1, peroxisomal                                                                                                                                                                                                                                                            |
| 221335_x_at, 223188_at,<br>233990_at                                                                                              | hypothetical protein flj12886                                                                                                                                                                                                                                                                        |
| 219566_at                                                                                                                         | pleckstrin homology domain containing, family f (with fyve domain)<br>member 1                                                                                                                                                                                                                       |
| 210007_s_at, 225447_at,<br>243598_at, 211613_s_at                                                                                 | glycerol-3-phosphate dehydrogenase 2 (mitochondrial)                                                                                                                                                                                                                                                 |
| 217892_s_at, 222456_s_at,<br>222457_s_at                                                                                          | lim domain and actin binding 1                                                                                                                                                                                                                                                                       |
| 219871_at, 235943_at                                                                                                              | hypothetical protein flj13197                                                                                                                                                                                                                                                                        |
| 204682_at, 223690_at                                                                                                              | latent transforming growth factor beta binding protein 2                                                                                                                                                                                                                                             |
| 224762_at                                                                                                                         | serine incorporator 2                                                                                                                                                                                                                                                                                |
| 1568868_at                                                                                                                        | flj16008 protein                                                                                                                                                                                                                                                                                     |
| 1554492_at, 238938_at,<br>237692_at, 234155_at,<br>233692_at, 220212_s_at,<br>1566889_at, 1554493_s_at,<br>1566888_at, 1558306_at | thyroid adenoma associated                                                                                                                                                                                                                                                                           |
| 233740_at, 233810_x_at                                                                                                            | pro1268 protein                                                                                                                                                                                                                                                                                      |
| 213076_at                                                                                                                         | inositol 1,4,5-trisphosphate 3-kinase c                                                                                                                                                                                                                                                              |
| 209531_at                                                                                                                         | glutathione transferase zeta 1 (maleylacetoacetate isomerase)                                                                                                                                                                                                                                        |
| 207575_at                                                                                                                         | similar to golgi autoantigen, golgin subfamily a member 6 (golgin<br>linked to pml) (golgin-like protein)                                                                                                                                                                                            |

|                                                              |                          |                                                                                 |
|--------------------------------------------------------------|--------------------------|---------------------------------------------------------------------------------|
| 206098_at                                                    |                          | zinc finger protein 482                                                         |
| 203254_s_at,<br>236132_at                                    | 232763_at,               | talin 1                                                                         |
| 205278_at,<br>206670_s_at                                    | 206669_at,               | glutamate decarboxylase 1 (brain, 67kda)                                        |
| 225035_x_at, 236841_at                                       |                          | cxyorf1-related protein                                                         |
| 226797_at, 243552_at                                         |                          | mbt domain containing 1                                                         |
| 223599_at                                                    |                          | tripartite motif-containing 6                                                   |
| 1556000_s_at,<br>224945_at, 220297_at, 217141_at             | 224943_at,               | btb (poz) domain containing 7                                                   |
| 1569496_s_at                                                 |                          | hypothetical gene supported by bc044945; bc069032                               |
| 204094_s_at,<br>210953_at, 215547_at                         | 210954_s_at,             | tsc22 domain family, member 2                                                   |
| 204248_at,<br>213944_x_at, 221955_at, 564_at,<br>214679_x_at | 213766_x_at,             | guanine nucleotide binding protein (g protein), alpha 11 (gq class)             |
| 202949_s_at                                                  |                          | four and a half lim domains 2                                                   |
| 217745_s_at,<br>244341_at, 222393_s_at                       | 231199_at,               | mak3 homolog (s. cerevisiae)                                                    |
| 229661_at                                                    |                          | sal-like 4 (drosophila)                                                         |
| 218855_at                                                    |                          | seven transmembrane domain orphan receptor                                      |
| 1552839_at                                                   |                          | chromosome 14 open reading frame 54                                             |
| 1560792_at, 218611_at                                        |                          | immediate early response 5                                                      |
| 220225_at                                                    |                          | iroquois homeobox protein 4                                                     |
| 202568_s_at,<br>202569_s_at                                  | 232537_x_at,             | map/microtubule affinity-regulating kinase 3                                    |
| 211003_x_at, 211573_x_at                                     |                          | transglutaminase 2 (c polypeptide, protein-glutamine-gamma-glutamyltransferase) |
| 230409_at,<br>226770_at                                      | 224307_x_at,             | kiaa1634 protein                                                                |
| 213379_at, 232126_at                                         |                          | coenzyme q2 homolog, prenyltransferase (yeast)                                  |
| 201328_at,<br>201329_s_at, 242784_at                         | 222303_at,<br>241193_at, | v-ets erythroblastosis virus e26 oncogene homolog 2 (avian)                     |
| 236390_at                                                    |                          | chromosome 20 open reading frame 94                                             |
| 214024_s_at                                                  |                          | digeorge syndrome critical region gene 6                                        |
| 203578_s_at, 203580_s_at                                     |                          | solute carrier family 7 (cationic amino acid transporter, y+ system), member 6  |
| 212153_at, 238040_at                                         |                          | pogo transposable element with znf domain                                       |
| 1552619_a_at, 222608_s_at                                    |                          | anillin, actin binding protein (scraps homolog, drosophila)                     |
| 1562765_at,<br>202133_at,                                    |                          | ww domain containing transcription regulator 1                                  |

|                                                                                   |                                                                                                                                                                                                                                                                                          |
|-----------------------------------------------------------------------------------|------------------------------------------------------------------------------------------------------------------------------------------------------------------------------------------------------------------------------------------------------------------------------------------|
| 228629_s_at, 202134_s_at,<br>202132_at                                            |                                                                                                                                                                                                                                                                                          |
| 235675_at, 241727_x_at                                                            | dihydrofolate reductase-like 1                                                                                                                                                                                                                                                           |
| 204393_s_at, 237030_at,<br>237077_at, 231711_at, 240953_at                        | acid phosphatase, prostate                                                                                                                                                                                                                                                               |
| 1554410_a_at, 225906_at                                                           | similar to rcc1-like g exchanging factor-like isoform 1; rcc1-like g exchanging factor-like                                                                                                                                                                                              |
| 225035_x_at, 225995_x_at                                                          | hypothetical protein loc58481                                                                                                                                                                                                                                                            |
| 201087_at, 211823_s_at                                                            | paxillin                                                                                                                                                                                                                                                                                 |
| 1554855_at, 1569947_at,<br>207058_s_at, 1555668_a_at                              | parkinson disease (autosomal recessive, juvenile) 2, parkin                                                                                                                                                                                                                              |
| 200008_s_at, 200009_at                                                            | gdp dissociation inhibitor 2                                                                                                                                                                                                                                                             |
| 203641_s_at, 211032_at,<br>229598_at, 215393_s_at,<br>203642_s_at                 | cobl-like 1                                                                                                                                                                                                                                                                              |
| 231185_at                                                                         | kiaa1161                                                                                                                                                                                                                                                                                 |
| 225343_at, 242617_at                                                              | transmembrane emp24 protein transport domain containing 8                                                                                                                                                                                                                                |
| 212974_at, 212975_at, 240358_at                                                   | denn/madd domain containing 3                                                                                                                                                                                                                                                            |
| 211692_s_at                                                                       | bcl2 binding component 3                                                                                                                                                                                                                                                                 |
| 226608_at, 242555_at                                                              | similar to riken cdna 4921524j17                                                                                                                                                                                                                                                         |
| 1562110_at, 224768_at,<br>224775_at                                               | hypothetical protein loc55677                                                                                                                                                                                                                                                            |
| 219825_at                                                                         | cytochrome p450, family 26, subfamily b, polypeptide 1                                                                                                                                                                                                                                   |
| 215410_at                                                                         | similar to pms4 homolog mismatch repair protein - human                                                                                                                                                                                                                                  |
| 243659_at, 214446_at,<br>226982_at, 235592_at,<br>226099_at, 214445_at, 244026_at | elongation factor, rna polymerase ii, 2                                                                                                                                                                                                                                                  |
| 209452_s_at, 225928_at,<br>225926_at                                              | vesicle transport through interaction with t-snares homolog 1b (yeast)                                                                                                                                                                                                                   |
| 220681_at                                                                         | hypothetical protein flj10945                                                                                                                                                                                                                                                            |
| 216070_at, 219553_at                                                              | non-metastatic cells 7, protein expressed in (nucleoside-diphosphate kinase)                                                                                                                                                                                                             |
| 237303_at                                                                         | ,consensus includes gb:ai126321 /fea=est /db_xref=gi:3594835 /db_xref=est:qd82b11.x1 /clone=image:1735965 /ug=hs.116318 ests,gb:ai126321 /db_xref=gi:3594835 /db_xref=qd82b11.x1 /clone=image:1735965 /fea=est /cnt=7 /tid=hs.116318.0 /tier=consend /stk=6 /ug=hs.116318 /ug_title=ests |
| 218368_s_at                                                                       | tumor necrosis factor receptor superfamily, member 12a                                                                                                                                                                                                                                   |
| 207606_s_at, 243289_at                                                            | hypothetical protein flj10971                                                                                                                                                                                                                                                            |
| 1561015_at, 222913_at,<br>219657_s_at, 225140_at,                                 | kruppel-like factor 3 (basic)                                                                                                                                                                                                                                                            |



|                                                                                           |                                                                                |
|-------------------------------------------------------------------------------------------|--------------------------------------------------------------------------------|
| 230315_at                                                                                 |                                                                                |
| 205717_x_at, 210368_at,<br>209079_x_at, 211066_x_at,<br>215836_s_at                       | protocadherin gamma subfamily b, 4                                             |
| 200885_at, 235742_at                                                                      | ras homolog gene family, member c                                              |
| 217991_x_at, 233794_at,<br>223635_s_at                                                    | single stranded dna binding protein 3                                          |
| 217876_at, 233173_x_at                                                                    | general transcription factor iiic, polypeptide 5, 63kda                        |
| 1554685_a_at, 212942_s_at,<br>239747_s_at, 215140_at                                      | hypothetical protein ir2155535                                                 |
| 210855_at, 210562_at, 205862_at                                                           | greb1 protein                                                                  |
| 220768_s_at, 229702_at,<br>227767_at                                                      | casein kinase 1, gamma 3                                                       |
| 207291_at, 238513_at                                                                      | proline rich gla (g-carboxyglutamic acid) 4 (transmembrane)                    |
| 229156_s_at, 230373_at,<br>229157_at                                                      | loc441301                                                                      |
| 212665_at                                                                                 | tcdd-inducible poly(adp-ribose) polymerase                                     |
| 200693_at                                                                                 | mindbomb homolog 1 (drosophila)                                                |
| 1552287_s_at, 1559863_a_at,<br>236250_at                                                  | afg3 atpase family gene 3-like 1 (yeast)                                       |
| 1555557_a_at, 1556103_at,<br>203838_s_at, 228279_s_at,<br>203839_s_at                     | tyrosine kinase, non-receptor, 2                                               |
| 1554305_at                                                                                | hypothetical protein mgc20647                                                  |
| 207017_at, 207018_s_at                                                                    | rab27b, member ras oncogene family                                             |
| 241749_at                                                                                 | similar to riken cdna 2310039e09                                               |
| 215979_s_at, 212295_s_at,<br>215401_at, 212292_at,<br>1554971_at, 206566_at,<br>212290_at | solute carrier family 7 (cationic amino acid transporter, y+ system), member 1 |
| 1566709_at, 208296_x_at,<br>210260_s_at                                                   | tumor necrosis factor, alpha-induced protein 8                                 |
| 218782_s_at, 228401_at,<br>222740_at, 235266_at                                           | atpase family, aaa domain containing 2                                         |
| 222598_s_at, 222599_s_at,<br>239141_at                                                    | retinoic acid inducible in neuroblastoma                                       |
| 218642_s_at, 222701_s_at                                                                  | coiled-coil-helix-coiled-coil-helix domain containing 7                        |
| 1559034_at                                                                                | signal-regulatory protein beta 2                                               |
| 206029_at                                                                                 | ankyrin repeat domain 1 (cardiac muscle)                                       |
| 1552618_at, 212800_at,<br>214441_at, 212799_at                                            | syntaxin 6                                                                     |

|                                                                                     |                                                                        |                                                                                                                                                                                                                                                                                                                                          |
|-------------------------------------------------------------------------------------|------------------------------------------------------------------------|------------------------------------------------------------------------------------------------------------------------------------------------------------------------------------------------------------------------------------------------------------------------------------------------------------------------------------------|
| 207127_s_at,<br>210588_x_at,<br>244454_at                                           | 210110_x_at,<br>208990_s_at,                                           | heterogeneous nuclear ribonucleoprotein h3 (2h9)                                                                                                                                                                                                                                                                                         |
| 203391_at                                                                           |                                                                        | fk506 binding protein 2, 13kda                                                                                                                                                                                                                                                                                                           |
| 204733_at                                                                           |                                                                        | kallikrein 6 (neurosin, zyme)                                                                                                                                                                                                                                                                                                            |
| 222478_at, 240086_at                                                                |                                                                        | vacuolar protein sorting 36 (yeast)                                                                                                                                                                                                                                                                                                      |
| 205872_x_at,<br>214099_s_at,<br>244511_at,<br>232509_at,<br>214129_at,<br>210305_at | 212390_at,<br>214130_s_at,<br>236704_at,<br>215575_at,<br>212392_s_at, | phosphodiesterase 4d interacting protein (myomegalin)                                                                                                                                                                                                                                                                                    |
| 231788_at                                                                           |                                                                        | g protein-coupled receptor 92                                                                                                                                                                                                                                                                                                            |
| 200810_s_at,<br>230142_s_at,<br>200811_at                                           | 228519_x_at,<br>225191_at,                                             | cold inducible rna binding protein                                                                                                                                                                                                                                                                                                       |
| 228853_at,<br>244030_at, 235180_at                                                  | 242408_at,                                                             | serine/threonine/tyrosine interacting protein                                                                                                                                                                                                                                                                                            |
| 219836_at                                                                           |                                                                        | zinc finger, bed-type containing 2                                                                                                                                                                                                                                                                                                       |
| 212803_at                                                                           |                                                                        | ngfi-a binding protein 2 (egr1 binding protein 2)                                                                                                                                                                                                                                                                                        |
| 1558017_s_at,<br>204005_s_at,<br>226231_at,<br>226223_at, 214090_at                 | 204004_at,<br>214237_x_at,<br>229515_at,                               | prkc, apoptosis, wt1, regulator                                                                                                                                                                                                                                                                                                          |
| 204363_at                                                                           |                                                                        | coagulation factor iii (thromboplastin, tissue factor)                                                                                                                                                                                                                                                                                   |
| 205395_s_at,<br>211334_at                                                           | 242456_at,                                                             | mre11 meiotic recombination 11 homolog a (s. cerevisiae)                                                                                                                                                                                                                                                                                 |
| 220360_at, 230185_at                                                                |                                                                        | thap domain containing 9                                                                                                                                                                                                                                                                                                                 |
| 238144_s_at                                                                         |                                                                        | ,consensus includes gb:bf514993 /fea=est /db_xref=gi:11600172<br>/db_xref=est:ui-h-bw1-anr-b-05-0-ui.s1 /clone=image:3083096<br>/ug=hs.126691 ests.gb:bf514993 /db_xref=gi:11600172<br>/db_xref=ui-h-bw1-anr-b-05-0-ui.s1 /clone=image:3083096 /fea=est<br>/cnt=12 /tid=hs.126691.0 /tier=consend /stk=6 /ug=hs.126691<br>/ug_title=ests |
| 1554414_a_at,<br>41553_at, 214161_at                                                | 204024_at,                                                             | chromosome 8 open reading frame 1                                                                                                                                                                                                                                                                                                        |
| 1562749_at                                                                          |                                                                        | hypothetical protein loc641912                                                                                                                                                                                                                                                                                                           |
| 201547_at,<br>211202_s_at, 201549_x_at                                              | 201548_s_at,                                                           | jumonji, at rich interactive domain 1b (rbp2-like)                                                                                                                                                                                                                                                                                       |
| 204258_at, 235791_x_at                                                              |                                                                        | chromodomain helicase dna binding protein 1                                                                                                                                                                                                                                                                                              |
| 217859_s_at,                                                                        | 222445_at,                                                             | solute carrier family 39 (zinc transporter), member 9                                                                                                                                                                                                                                                                                    |

|                                                                                                          |                                                                                        |                                                                                                                                                                                                                                                                                        |
|----------------------------------------------------------------------------------------------------------|----------------------------------------------------------------------------------------|----------------------------------------------------------------------------------------------------------------------------------------------------------------------------------------------------------------------------------------------------------------------------------------|
| 242115_at                                                                                                |                                                                                        |                                                                                                                                                                                                                                                                                        |
| 1555938_x_at, 201426_s_at                                                                                |                                                                                        | vimentin                                                                                                                                                                                                                                                                               |
| 212615_at,<br>229586_at,<br>235388_at,<br>244157_x_at,<br>240367_at                                      | 220586_at,<br>212616_at,<br>242157_at,<br>243660_at,                                   | hypothetical protein bc022889                                                                                                                                                                                                                                                          |
| 1560281_a_at                                                                                             |                                                                                        | transmembrane protein 95                                                                                                                                                                                                                                                               |
| 1555420_a_at,<br>239809_at, 204334_at                                                                    | 238482_at,                                                                             | kruppel-like factor 7 (ubiquitous)                                                                                                                                                                                                                                                     |
| 238106_at                                                                                                |                                                                                        | ,consensus includes gb:aw771190 /fea=est /db_xref=gi:7703243 /db_xref=est:hn53g10.x1 /clone=image:3027426 /ug=hs.16515 ests,gb:aw771190 /db_xref=gi:7703243 /db_xref=hn53g10.x1 /clone=image:3027426 /fea=est /cnt=15 /tid=hs.16515.0 /tier=consend /stk=3 /ug=hs.16515 /ug_title=ests |
| 204541_at,<br>230316_at,<br>232894_at                                                                    | 240024_at,<br>232895_s_at,                                                             | sec14-like 2 (s. cerevisiae)                                                                                                                                                                                                                                                           |
| 202575_at                                                                                                |                                                                                        | cellular retinoic acid binding protein 2                                                                                                                                                                                                                                               |
| 214604_at                                                                                                |                                                                                        | homeobox d11                                                                                                                                                                                                                                                                           |
| 237603_at                                                                                                |                                                                                        | chromosome 1 open reading frame 100                                                                                                                                                                                                                                                    |
| 1570031_at,<br>227414_at,<br>233164_x_at,<br>236690_at                                                   | 226948_at,<br>226945_at,<br>243898_at,                                                 | rhomboid domain containing 1                                                                                                                                                                                                                                                           |
| 226066_at,<br>240555_at                                                                                  | 207233_s_at,                                                                           | microphthalmia-associated transcription factor                                                                                                                                                                                                                                         |
| 206295_at                                                                                                |                                                                                        | interleukin 18 (interferon-gamma-inducing factor)                                                                                                                                                                                                                                      |
| 207121_s_at                                                                                              |                                                                                        | mitogen-activated protein kinase 6                                                                                                                                                                                                                                                     |
| 215323_at, 216744_at, 216443_at                                                                          |                                                                                        | leucine zipper protein 2                                                                                                                                                                                                                                                               |
| 1557905_s_at,<br>204489_s_at,<br>212014_x_at,<br>217523_at,<br>234411_x_at,<br>216062_at,<br>210916_s_at | 204490_s_at,<br>209835_x_at,<br>216056_at,<br>234418_x_at,<br>229221_at,<br>212063_at, | cd44 antigen (indian blood group)                                                                                                                                                                                                                                                      |
| 1553310_at                                                                                               |                                                                                        | phospholipase b1                                                                                                                                                                                                                                                                       |
| 223417_at,<br>238670_at, 238748_at                                                                       | 224200_s_at,                                                                           | rad18 homolog (s. cerevisiae)                                                                                                                                                                                                                                                          |
| 203431_s_at, 210791_s_at                                                                                 |                                                                                        | rho gtpase-activating protein                                                                                                                                                                                                                                                          |

|                                             |                               |                                                                                                                                                                                                                                                                                     |
|---------------------------------------------|-------------------------------|-------------------------------------------------------------------------------------------------------------------------------------------------------------------------------------------------------------------------------------------------------------------------------------|
| 1559353_at,<br>1559354_a_at,<br>228957_at   | 214915_at,<br>226820_at,      | flj25476 protein                                                                                                                                                                                                                                                                    |
| 226631_at, 226634_at                        |                               | similar to cg9643-pa                                                                                                                                                                                                                                                                |
| 223577_x_at, 223578_x_at                    |                               | pro1073 protein                                                                                                                                                                                                                                                                     |
| 224858_at, 224868_at                        |                               | zinc finger, dhhc-type containing 5                                                                                                                                                                                                                                                 |
| 218466_at                                   |                               | tbc1 domain family, member 17                                                                                                                                                                                                                                                       |
| 203510_at,<br>213816_s_at                   | 213807_x_at,                  | met proto-oncogene (hepatocyte growth factor receptor)                                                                                                                                                                                                                              |
| 1562256_at,<br>211822_s_at,<br>210113_s_at  | 1562257_x_at,<br>211824_x_at, | nacht, leucine rich repeat and pyd (pyrin domain) containing 1                                                                                                                                                                                                                      |
| 205169_at                                   |                               | retinoblastoma binding protein 5                                                                                                                                                                                                                                                    |
| 238092_at                                   |                               | leucine rich repeat and fibronectin type iii domain containing 4                                                                                                                                                                                                                    |
| 1562822_at,<br>242800_at, 237821_at         | 228933_at,                    | nance-horan syndrome (congenital cataracts and dental anomalies)                                                                                                                                                                                                                    |
| 1555666_at,<br>229465_s_at,<br>1556116_s_at | 210823_s_at,<br>226571_s_at,  | protein tyrosine phosphatase, receptor type, d                                                                                                                                                                                                                                      |
| 204729_s_at                                 |                               | syntaxin 1a (brain)                                                                                                                                                                                                                                                                 |
| 1556318_s_at,<br>207483_s_at,<br>208838_at  | 239771_at,<br>208839_s_at,    | cullin-associated and neddylation-dissociated 1                                                                                                                                                                                                                                     |
| 201794_s_at,<br>242575_at, 236367_at        | 201793_x_at,                  | smg-7 homolog, nonsense mediated mrna decay factor (c. elegans)                                                                                                                                                                                                                     |
| 224141_at                                   |                               | hypothetical protein mgc10701                                                                                                                                                                                                                                                       |
| 205717_x_at,<br>215836_s_at,<br>209079_x_at | 210368_at,<br>211066_x_at,    | protocadherin gamma subfamily a, 8                                                                                                                                                                                                                                                  |
| 1554903_at, 1554905_x_at                    |                               | fksg43 gene                                                                                                                                                                                                                                                                         |
| 237830_at                                   |                               | ,consensus includes gb:aa700206 /fea=est /db_xref=gi:2703169 /db_xref=est:zj44g03.s1 /clone=image:453172 /ug=hs.21689 ests,gb:aa700206 /db_xref=gi:2703169 /db_xref=zj44g03.s1 /clone=image:453172 /fea=est /cnt=7 /tid=hs.21689.0 /tier=consend /stk=7 /ug=hs.21689 /ug_title=ests |
| 208748_s_at,<br>213819_s_at, 208749_x_at    | 210142_x_at,                  | flotillin 1                                                                                                                                                                                                                                                                         |
| 237829_at                                   |                               | ,consensus includes gb:ai732280 /fea=est /db_xref=gi:5053393 /db_xref=est:yj73a06.x5 /clone=image:154354 /ug=hs.25996 ests, moderately similar to uqhur7 ubiquitin ribosomal protein s27a, cytosolic h.sapiens,gb:ai732280 /db_xref=gi:5053393                                      |

|                                                  |                                                                                                                                                                                                                                                                                          |
|--------------------------------------------------|------------------------------------------------------------------------------------------------------------------------------------------------------------------------------------------------------------------------------------------------------------------------------------------|
|                                                  | /db_xref=yj73a06.x5 /clone=image:154354 /fea=est /cnt=5 /tid=hs.25996.0 /tier=consend /stk=5 /ug=hs.25996 /ug_title=ests, moderately similar to uqhur7 ubiquitin ribosomal protein s27a, cytosolic (h.sapiens)                                                                           |
| 237820_at                                        | ,consensus includes gb:be327079 /fea=est /db_xref=gi:9200855 /db_xref=est:hw06g10.x1 /clone=image:3182178 /ug=hs.202037 ests,gb:be327079 /db_xref=gi:9200855 /db_xref=hw06g10.x1 /clone=image:3182178 /fea=est /cnt=7 /tid=hs.202037.0 /tier=consend /stk=7 /ug=hs.202037 /ug_title=ests |
| 200634_at                                        | profilin 1                                                                                                                                                                                                                                                                               |
| 202181_at                                        | kiaa0247                                                                                                                                                                                                                                                                                 |
| 1555269_a_at, 218804_at                          | transmembrane protein 16a                                                                                                                                                                                                                                                                |
| 221667_s_at, 233057_at                           | heat shock 22kda protein 8                                                                                                                                                                                                                                                               |
| 210944_s_at, 214475_x_at, 235714_at, 211890_x_at | calpain 3, (p94)                                                                                                                                                                                                                                                                         |
| 201732_s_at, 201733_at, 240237_at, 201735_s_at   | chloride channel 3                                                                                                                                                                                                                                                                       |
| 205133_s_at                                      | heat shock 10kda protein 1 (chaperonin 10)                                                                                                                                                                                                                                               |
| 1563958_at, 1569362_at, 201952_at, 240655_at     | activated leukocyte cell adhesion molecule                                                                                                                                                                                                                                               |
| 1556933_at, 217813_s_at, 222431_at               | spindlin                                                                                                                                                                                                                                                                                 |
| 201502_s_at, 231699_at                           | nuclear factor of kappa light polypeptide gene enhancer in b-cells inhibitor, alpha                                                                                                                                                                                                      |
| 240950_s_at                                      | hypothetical protein flj32658                                                                                                                                                                                                                                                            |
| 231714_s_at, 231962_at                           | adaptor-related protein complex 4, beta 1 subunit                                                                                                                                                                                                                                        |
| 201136_at                                        | proteolipid protein 2 (colonic epithelium-enriched)                                                                                                                                                                                                                                      |
| 1559425_at, 206099_at, 233411_at                 | protein kinase c, eta                                                                                                                                                                                                                                                                    |
| 204726_at, 244091_at                             | cadherin 13, h-cadherin (heart)                                                                                                                                                                                                                                                          |
| 1568981_at                                       | ,gb:bc037911.1 /db_xref=gi:23138683 /tid=hs.2.390530.1 /cnt=13 /fea=mrna /tier=consend /stk=0 /ug=hs.390530 /ug_title=homo sapiens, clone image:5277449, mrna /def=homo sapiens, mrna.                                                                                                   |
| 218530_at                                        | formin homology 2 domain containing 1                                                                                                                                                                                                                                                    |
| 200632_s_at                                      | n-myc downstream regulated gene 1                                                                                                                                                                                                                                                        |
| 220632_s_at, 225560_at, 239535_at                | protein-o-mannosyltransferase 2                                                                                                                                                                                                                                                          |
| 1567679_at, 1567682_x_at, 1567681_at             | rna, u19 small nucleolar                                                                                                                                                                                                                                                                 |
| 212685_s_at                                      | dkfzp434n024 protein                                                                                                                                                                                                                                                                     |
| 207826_s_at                                      | inhibitor of dna binding 3, dominant negative helix-loop-helix protein                                                                                                                                                                                                                   |

|                                                                              |                                                                                                                                                                                                                                                                                         |
|------------------------------------------------------------------------------|-----------------------------------------------------------------------------------------------------------------------------------------------------------------------------------------------------------------------------------------------------------------------------------------|
| 221044_s_at, 224175_s_at                                                     | tripartite motif-containing 34                                                                                                                                                                                                                                                          |
| 202055_at, 202056_at,<br>202057_at, 202058_s_at,<br>213741_s_at, 202059_s_at | karyopherin alpha 1 (importin alpha 5)                                                                                                                                                                                                                                                  |
| 1559436_x_at, 203388_at                                                      | arrestin, beta 2                                                                                                                                                                                                                                                                        |
| 206499_s_at, 215747_s_at                                                     | regulator of chromosome condensation 1                                                                                                                                                                                                                                                  |
| 207561_s_at                                                                  | amiloride-sensitive cation channel 3                                                                                                                                                                                                                                                    |
| 217755_at, 222396_at                                                         | hematological and neurological expressed 1                                                                                                                                                                                                                                              |
| 210119_at, 211806_s_at                                                       | potassium inwardly-rectifying channel, subfamily j, member 15                                                                                                                                                                                                                           |
| 218724_s_at                                                                  | hypothetical protein loc57163                                                                                                                                                                                                                                                           |
| 1552277_a_at, 1555841_at                                                     | chromosome 9 open reading frame 30                                                                                                                                                                                                                                                      |
| 203233_at, 242743_at                                                         | interleukin 4 receptor                                                                                                                                                                                                                                                                  |
| 201561_s_at                                                                  | calsyntenin 1                                                                                                                                                                                                                                                                           |
| 219284_at                                                                    | hs pb (heat shock 27kda) associated protein 1                                                                                                                                                                                                                                           |
| 205192_at                                                                    | mitogen-activated protein kinase kinase kinase 14                                                                                                                                                                                                                                       |
| 203433_at, 210242_x_at                                                       | 5,10-methenyltetrahydrofolate synthetase (5-formyltetrahydrofolate cyclo-ligase)                                                                                                                                                                                                        |
| 228284_at                                                                    | hypothetical gene supported by bc000228; nm_005077                                                                                                                                                                                                                                      |
| 225356_at                                                                    | hypothetical protein mgc12538                                                                                                                                                                                                                                                           |
| 202451_at, 202453_s_at,<br>242656_at                                         | general transcription factor ii h, polypeptide 1, 62kda                                                                                                                                                                                                                                 |
| 242559_at                                                                    | ,consensus includes gb:bf055060 /fea=est /db_xref=gi:10808956 /db_xref=est:7j83c10.x1 /clone=image:3393042 /ug=hs.25006 ests,gb:bf055060 /db_xref=gi:10808956 /db_xref=7j83c10.x1 /clone=image:3393042 /fea=est /cnt=3 /tid=hs.25006.0 /tier=consend /stk=3 /ug=hs.25006 /ug_title=ests |
| 204476_s_at                                                                  | pyruvate carboxylase                                                                                                                                                                                                                                                                    |
| 206110_at, 208496_x_at,<br>214472_at, 239669_at,<br>214522_x_at              | histone 1, h3a                                                                                                                                                                                                                                                                          |
| 220939_s_at                                                                  | dipeptidyl-peptidase 8                                                                                                                                                                                                                                                                  |
| 1554153_a_at, 203278_s_at,<br>227090_at, 1558965_at                          | phd finger protein 21a                                                                                                                                                                                                                                                                  |
| 1552477_a_at, 1552478_a_at                                                   | interferon regulatory factor 6                                                                                                                                                                                                                                                          |
| 232710_at                                                                    | similar to williams beuren syndrome chromosome region 19                                                                                                                                                                                                                                |
| 205284_at                                                                    | kiaa0133                                                                                                                                                                                                                                                                                |
| 201175_at                                                                    | thioredoxin domain containing 14                                                                                                                                                                                                                                                        |
| 1566646_at, 1566647_s_at                                                     | hypothetical protein loc149086                                                                                                                                                                                                                                                          |
| 207643_s_at, 241944_x_at                                                     | tumor necrosis factor receptor superfamily, member 1a                                                                                                                                                                                                                                   |
| 1556456_at, 1556457_s_at,                                                    | flij39739 protein                                                                                                                                                                                                                                                                       |

|                                                                                         |                                                                                        |
|-----------------------------------------------------------------------------------------|----------------------------------------------------------------------------------------|
| 1568609_s_at                                                                            |                                                                                        |
| 209885_at, 31846_at                                                                     | ras homolog gene family, member d                                                      |
| 210214_s_at, 231873_at,<br>238516_at, 238393_at,<br>209920_at, 1556075_at,<br>225144_at | bone morphogenetic protein receptor, type ii (serine/threonine kinase)                 |
| 208200_at, 210118_s_at                                                                  | interleukin 1, alpha                                                                   |
| 207878_at                                                                               | cytokeratin 2                                                                          |
| 202656_s_at, 202657_s_at                                                                | serta domain containing 2                                                              |
| 209026_x_at, 212320_at,<br>211714_x_at                                                  | tubulin, beta                                                                          |
| 200045_at                                                                               | atp-binding cassette, sub-family f (gcn20), member 1                                   |
| 202308_at, 1558875_at                                                                   | sterol regulatory element binding transcription factor 1                               |
| 200838_at, 200839_s_at,<br>243157_at, 213274_s_at                                       | cathepsin b                                                                            |
| 225621_at, 228166_at                                                                    | asparagine-linked glycosylation 2 homolog (yeast, alpha-1,3-mannosyltransferase)       |
| 202351_at, 232797_at,<br>241769_at, 236251_at                                           | integrin, alpha v (vitronectin receptor, alpha polypeptide, antigen cd51)              |
| 207628_s_at, 231415_at                                                                  | putative methyltransferase                                                             |
| 203065_s_at, 212097_at                                                                  | caveolin 1, caveolae protein, 22kda                                                    |
| 209344_at, 235094_at,<br>212481_s_at                                                    | tropomyosin 4                                                                          |
| 224413_s_at                                                                             | tm2 domain containing 2                                                                |
| 220228_at, 220229_s_at,<br>241174_at                                                    | adaptor-related protein complex 4, epsilon 1 subunit                                   |
| 1569696_at                                                                              | similar to hypothetical protein flj20506                                               |
| 231287_s_at                                                                             | plasma kallikrein-like protein 4                                                       |
| 200052_s_at                                                                             | interleukin enhancer binding factor 2, 45kda                                           |
| 203936_s_at                                                                             | matrix metalloproteinase 9 (gelatinase b, 92kda gelatinase, 92kda type iv collagenase) |
| 206151_x_at, 210080_x_at,<br>211738_x_at                                                | elastase 3a, pancreatic                                                                |
| 229054_at                                                                               | flj39779 protein                                                                       |
| 208828_at                                                                               | polymerase (dna directed), epsilon 3 (p17 subunit)                                     |
| 235911_at                                                                               | hypothetical gene supported by bc034933; bc068085                                      |
| 204538_x_at                                                                             | nuclear pore complex interacting protein                                               |
| 232968_at                                                                               | fibronectin type iii and ankyrin repeat domains 1                                      |
| 207611_at                                                                               | histone 1, h2bl                                                                        |
| 1562022_s_at                                                                            | rad9 homolog a (s. pombe)                                                              |

|                                                                                              |                                                                                                                                                                                                                                                                                                                                                                                                                                                                                        |
|----------------------------------------------------------------------------------------------|----------------------------------------------------------------------------------------------------------------------------------------------------------------------------------------------------------------------------------------------------------------------------------------------------------------------------------------------------------------------------------------------------------------------------------------------------------------------------------------|
| 205717_x_at, 211066_x_at,<br>209079_x_at, 211876_x_at,<br>215836_s_at, 211877_s_at           | protocadherin gamma subfamily a, 11                                                                                                                                                                                                                                                                                                                                                                                                                                                    |
| 204055_s_at, 215930_s_at                                                                     | ctage family, member 5                                                                                                                                                                                                                                                                                                                                                                                                                                                                 |
| 231887_s_at                                                                                  | kiaa1274                                                                                                                                                                                                                                                                                                                                                                                                                                                                               |
| 201301_s_at, 201302_at                                                                       | annexin a4                                                                                                                                                                                                                                                                                                                                                                                                                                                                             |
| 201107_s_at, 201108_s_at,<br>201110_s_at, 239336_at,<br>215775_at, 201109_s_at               | thrombospondin 1                                                                                                                                                                                                                                                                                                                                                                                                                                                                       |
| 203966_s_at, 231370_at,<br>210407_at, 229027_at                                              | protein phosphatase 1a (formerly 2c), magnesium-dependent, alpha isoform                                                                                                                                                                                                                                                                                                                                                                                                               |
| 206336_at                                                                                    | chemokine (c-x-c motif) ligand 6 (granulocyte chemotactic protein 2)                                                                                                                                                                                                                                                                                                                                                                                                                   |
| 214462_at, 241335_at                                                                         | suppressor of cytokine signaling 6                                                                                                                                                                                                                                                                                                                                                                                                                                                     |
| 218345_at, 244083_at                                                                         | hepatocellular carcinoma-associated antigen 112                                                                                                                                                                                                                                                                                                                                                                                                                                        |
| 214328_s_at                                                                                  | heat shock protein 90kda alpha (cytosolic), class a member 1                                                                                                                                                                                                                                                                                                                                                                                                                           |
| 210064_s_at, 210065_s_at                                                                     | uroplakin 1b                                                                                                                                                                                                                                                                                                                                                                                                                                                                           |
| 200710_at                                                                                    | acyl-coenzyme a dehydrogenase, very long chain                                                                                                                                                                                                                                                                                                                                                                                                                                         |
| 235005_at                                                                                    | hypothetical protein mgc4562                                                                                                                                                                                                                                                                                                                                                                                                                                                           |
| 212575_at, 213986_s_at,<br>213985_s_at, 230089_s_at                                          | chromosome 19 open reading frame 6                                                                                                                                                                                                                                                                                                                                                                                                                                                     |
| 212551_at, 212554_at                                                                         | cap, adenylate cyclase-associated protein, 2 (yeast)                                                                                                                                                                                                                                                                                                                                                                                                                                   |
| 201398_s_at, 201399_s_at,<br>210733_at                                                       | translocation associated membrane protein 1                                                                                                                                                                                                                                                                                                                                                                                                                                            |
| 242827_x_at                                                                                  | ,consensus includes gb:aa806368 /fea=est /db_xref=gi:2875118 /db_xref=est:oc22e04.s1 /clone=image:1350462 /ug=hs.272159 ests, weakly similar to alu5_human alu subfamily sc sequence contamination warning entry h.sapiens,gb:aa806368 /db_xref=gi:2875118 /db_xref=oc22e04.s1 /clone=image:1350462 /fea=est /cnt=3 /tid=hs.272159.0 /tier=consend /stk=3 /ug=hs.272159 /ug_title=ests, weakly similar to alu5_human alu subfamily sc sequence contamination warning entry (h.sapiens) |
| 225664_at, 231766_s_at,<br>233109_at                                                         | collagen, type xii, alpha 1                                                                                                                                                                                                                                                                                                                                                                                                                                                            |
| 203821_at, 38037_at, 222076_at,<br>244857_at                                                 | heparin-binding egf-like growth factor                                                                                                                                                                                                                                                                                                                                                                                                                                                 |
| 206536_s_at, 206537_at,<br>225859_at, 235222_x_at,<br>243026_x_at, 228363_at,<br>225858_s_at | baculoviral iap repeat-containing 4                                                                                                                                                                                                                                                                                                                                                                                                                                                    |
| 215501_s_at, 221563_at                                                                       | dual specificity phosphatase 10                                                                                                                                                                                                                                                                                                                                                                                                                                                        |
| 201738_at                                                                                    | eukaryotic translation initiation factor 1b                                                                                                                                                                                                                                                                                                                                                                                                                                            |



|                                                                   |                                                                                                                                                                                  |
|-------------------------------------------------------------------|----------------------------------------------------------------------------------------------------------------------------------------------------------------------------------|
| 220744_s_at                                                       | intraflagellar transport 122 homolog (chlamydomonas)                                                                                                                             |
| 1555486_a_at, 233119_at,<br>237846_at, 233379_at, 219383_at       | hypothetical protein flj14213                                                                                                                                                    |
| 229296_at                                                         | loc375758                                                                                                                                                                        |
| 1559526_at, 240305_at                                             | chromosome 10 open reading frame 108                                                                                                                                             |
| 1556034_s_at                                                      | myotubularin related protein 11                                                                                                                                                  |
| 219116_s_at                                                       | dcn1, defective in cullin neddylation 1, domain containing 2 (s. cerevisiae)                                                                                                     |
| 208490_x_at, 214455_at,<br>236193_at, 208527_x_at,<br>208523_x_at | histone 1, h2bd                                                                                                                                                                  |
| 211662_s_at                                                       | voltage-dependent anion channel 2                                                                                                                                                |
| 235096_at                                                         | leo1, paf1/ra polymerase ii complex component, homolog (s. cerevisiae)                                                                                                           |
| 219011_at                                                         | pleckstrin homology domain containing, family a (phosphoinositide binding specific) member 4                                                                                     |
| 224435_at, 228155_at                                              | chromosome 10 open reading frame 58                                                                                                                                              |
| 204342_at, 244481_at, 241229_at                                   | solute carrier family 25 (mitochondrial carrier; phosphate carrier), member 24                                                                                                   |
| 207717_s_at, 214154_s_at                                          | plakophilin 2                                                                                                                                                                    |
| 209069_s_at, 211997_x_at,<br>211998_at                            | h3 histone, family 3a                                                                                                                                                            |
| 204961_s_at, 214084_x_at                                          | neutrophil cytosolic factor 1, (chronic granulomatous disease, autosomal 1)                                                                                                      |
| 213284_at, 211962_s_at,<br>213277_at, 211965_at                   | zinc finger protein 36, c3h type-like 1                                                                                                                                          |
| 1555038_at, 220120_s_at,<br>220119_at, 228259_s_at                | erythrocyte membrane protein band 4.1 like 4a                                                                                                                                    |
| 200758_s_at, 200759_x_at,<br>214179_s_at                          | nuclear factor (erythroid-derived 2)-like 1                                                                                                                                      |
| 244766_at                                                         | nuclear pore complex interacting protein pseudogene                                                                                                                              |
| 201217_x_at, 211666_x_at,<br>211073_x_at, 212039_x_at             | ribosomal protein l3                                                                                                                                                             |
| 202790_at                                                         | claudin 7                                                                                                                                                                        |
| 202727_s_at, 211676_s_at,<br>242903_at                            | interferon gamma receptor 1                                                                                                                                                      |
| 221561_at                                                         | sterol o-acyltransferase (acyl-coenzyme a: cholesterol acyltransferase) 1                                                                                                        |
| 243039_at                                                         | ,consensus includes gb:ai042377 /fea=est /db_xref=gi:3281571 /db_xref=est:ox62c03.x1 /clone=image:1660900 /ug=hs.132156 ests,gb:ai042377 /db_xref=gi:3281571 /db_xref=ox62c03.x1 |

|                                                                                                                                            |                                                                                                                                                                                                                                                                                                                     |
|--------------------------------------------------------------------------------------------------------------------------------------------|---------------------------------------------------------------------------------------------------------------------------------------------------------------------------------------------------------------------------------------------------------------------------------------------------------------------|
|                                                                                                                                            | /clone=image:1660900 /fea=est /cnt=4 /tid=hs.132156.0 /tier=consend /stk=3 /ug=hs.132156 /ug_title=ests                                                                                                                                                                                                             |
| 201631_s_at                                                                                                                                | immediate early response 3                                                                                                                                                                                                                                                                                          |
| 205363_at                                                                                                                                  | butyrobetaine (gamma), 2-oxoglutarate dioxygenase (gamma-butyrobetaine hydroxylase) 1                                                                                                                                                                                                                               |
| 215836_s_at, 205717_x_at, 209079_x_at, 211066_x_at                                                                                         | protocadherin gamma subfamily b, 1                                                                                                                                                                                                                                                                                  |
| 218887_at, 229884_s_at                                                                                                                     | mitochondrial ribosomal protein l2                                                                                                                                                                                                                                                                                  |
| 1560705_at, 223192_at, 221432_s_at                                                                                                         | solute carrier family 25, member 28                                                                                                                                                                                                                                                                                 |
| 201251_at, 213700_s_at, 217581_at                                                                                                          | pyruvate kinase, muscle                                                                                                                                                                                                                                                                                             |
| 218874_s_at, 228510_at                                                                                                                     | chromosome 6 open reading frame 134                                                                                                                                                                                                                                                                                 |
| 218693_at                                                                                                                                  | tetraspanin 15                                                                                                                                                                                                                                                                                                      |
| 221497_x_at, 224314_s_at                                                                                                                   | egl nine homolog 1 (c. elegans)                                                                                                                                                                                                                                                                                     |
| 211764_s_at, 233094_at, 215957_at, 214590_s_at                                                                                             | ubiquitin-conjugating enzyme e2d 1 (ubc4/5 homolog, yeast)                                                                                                                                                                                                                                                          |
| 208324_at, 243450_at, 237018_at, 229783_at, 227039_at, 224884_at, 222024_s_at, 222023_at, 221718_s_at, 208325_s_at, 213516_at, 209534_x_at | lymphoid blast crisis oncogene                                                                                                                                                                                                                                                                                      |
| 219119_at                                                                                                                                  | lsm8 homolog, u6 small nuclear rna associated (s. cerevisiae)                                                                                                                                                                                                                                                       |
| 243101_x_at                                                                                                                                | ,consensus includes gb:aw294701 /fea=est /db_xref=gi:6701337 /db_xref=est:ui-h-bw0-aim-a-10-0-ui.s1 /clone=image:2729754 /ug=hs.31040 ests,gb:aw294701 /db_xref=gi:6701337 /db_xref=ui-h-bw0-aim-a-10-0-ui.s1 /clone=image:2729754 /fea=est /cnt=3 /tid=hs.31040.0 /tier=consend /stk=3 /ug=hs.31040 /ug_title=ests |
| 206607_at, 243475_at, 225231_at, 229010_at, 225234_at                                                                                      | cas-br-m (murine) ecotropic retroviral transforming sequence                                                                                                                                                                                                                                                        |
| 221255_s_at                                                                                                                                | transmembrane protein 93                                                                                                                                                                                                                                                                                            |
| 1568126_at, 210427_x_at, 213503_x_at, 201590_x_at                                                                                          | annexin a2                                                                                                                                                                                                                                                                                                          |
| 243379_at                                                                                                                                  | ,consensus includes gb:ai733037 /fea=est /db_xref=gi:5054150 /db_xref=est:oj31b08.x5 /clone=image:1499895 /ug=hs.129990 ests,gb:ai733037 /db_xref=gi:5054150 /db_xref=oj31b08.x5 /clone=image:1499895 /fea=est /cnt=5 /tid=hs.129990.0 /tier=consend /stk=2 /ug=hs.129990 /ug_title=ests                            |
| 228476_at                                                                                                                                  | kiaa1407                                                                                                                                                                                                                                                                                                            |

|                                                                                                                                    |                                                                                                                                                                                                                                                                                                                                       |
|------------------------------------------------------------------------------------------------------------------------------------|---------------------------------------------------------------------------------------------------------------------------------------------------------------------------------------------------------------------------------------------------------------------------------------------------------------------------------------|
| 229362_at, 1553280_at                                                                                                              | hypothetical protein flj32312                                                                                                                                                                                                                                                                                                         |
| 201841_s_at                                                                                                                        | heat shock 27kda protein 1                                                                                                                                                                                                                                                                                                            |
| 220456_at                                                                                                                          | chromosome 20 open reading frame 38                                                                                                                                                                                                                                                                                                   |
| 1552543_a_at, 227461_at,<br>235852_at, 242583_at                                                                                   | stonin 2                                                                                                                                                                                                                                                                                                                              |
| 205292_s_at, 225932_s_at,<br>244131_at, 235454_at, 225107_at                                                                       | heterogeneous nuclear ribonucleoprotein a2/b1                                                                                                                                                                                                                                                                                         |
| 242993_at                                                                                                                          | phosphoenolpyruvate carboxykinase 2 (mitochondrial)                                                                                                                                                                                                                                                                                   |
| 206421_s_at                                                                                                                        | serpin peptidase inhibitor, clade b (ovalbumin), member 7                                                                                                                                                                                                                                                                             |
| 1565713_at                                                                                                                         | .gb:h72951 /db_xref=gi:1044767 /db_xref=ys05e02.s1<br>/clone=image:213914 /tid=hs2.396576.1 /cnt=4 /fea=mrna<br>/tier=consend /stk=0 /ug=hs.396576 /ug_title=homo sapiens full length<br>insert cdna clone ys05e02                                                                                                                    |
| 1565714_at                                                                                                                         | .gb:af085963.1 /db_xref=gi:3483308 /tid=hs2.396576.1 /cnt=4<br>/fea=mrna /tier=consend /stk=0 /ug=hs.396576 /ug_title=homo<br>sapiens full length insert cdna clone ys05e02 /def=homo sapiens full<br>length insert cdna clone ys05e02.                                                                                               |
| 201615_x_at, 214880_x_at,<br>243084_at, 235834_at,<br>231881_at, 215199_at,<br>215198_s_at, 212077_at,<br>201616_s_at, 201617_x_at | caldesmon 1                                                                                                                                                                                                                                                                                                                           |
| 243288_at                                                                                                                          | .consensus includes gb:aw135582 /fea=est /db_xref=gi:6139715<br>/db_xref=est:ui-h-bi1-acg-h-04-0-ui.s1 /clone=image:2714358<br>/ug=hs.201767 ests,gb:aw135582 /db_xref=gi:6139715<br>/db_xref=ui-h-bi1-acg-h-04-0-ui.s1 /clone=image:2714358 /fea=est<br>/cnt=6 /tid=hs.201767.0 /tier=consend /stk=1 /ug=hs.201767<br>/ug_title=ests |
| 225563_at, 239597_at, 239393_at                                                                                                    | pabp1-dependent poly a-specific ribonuclease subunit pan3                                                                                                                                                                                                                                                                             |
| 238460_at, 239586_at, 242944_at                                                                                                    | family with sequence similarity 83, member a                                                                                                                                                                                                                                                                                          |
| 1557964_at, 217607_x_at,<br>200004_at                                                                                              | eukaryotic translation initiation factor 4 gamma, 2                                                                                                                                                                                                                                                                                   |
| 235797_x_at, 235932_x_at,<br>241650_x_at                                                                                           | hemicentin-2                                                                                                                                                                                                                                                                                                                          |
| 1565947_a_at, 1565949_x_at,<br>224392_s_at, 219032_x_at                                                                            | opsin 3 (encephalopsin, panopsin)                                                                                                                                                                                                                                                                                                     |
| 204667_at, 237086_at                                                                                                               | forkhead box a1                                                                                                                                                                                                                                                                                                                       |
| 239363_at, 223558_at,<br>235917_at, 223559_s_at,<br>1560558_at                                                                     | chromosome 9 open reading frame 80                                                                                                                                                                                                                                                                                                    |
| 1554420_at, 1554980_a_at,                                                                                                          | activating transcription factor 3                                                                                                                                                                                                                                                                                                     |

|                                                    |                                                                                                                                                                                                                                                                                                                                                                                                                                                  |
|----------------------------------------------------|--------------------------------------------------------------------------------------------------------------------------------------------------------------------------------------------------------------------------------------------------------------------------------------------------------------------------------------------------------------------------------------------------------------------------------------------------|
| 202672_s_at                                        |                                                                                                                                                                                                                                                                                                                                                                                                                                                  |
| 206847_s_at, 206848_at                             | homeobox a7                                                                                                                                                                                                                                                                                                                                                                                                                                      |
| 225049_at                                          | biogenesis of lysosome-related organelles complex-1, subunit 2                                                                                                                                                                                                                                                                                                                                                                                   |
| 235399_at, 239853_at                               | kinesin light chain 3                                                                                                                                                                                                                                                                                                                                                                                                                            |
| 1570594_at, 230323_s_at, 226226_at                 | transmembrane protein 45b                                                                                                                                                                                                                                                                                                                                                                                                                        |
| 207368_at                                          | 5-hydroxytryptamine (serotonin) receptor 1d                                                                                                                                                                                                                                                                                                                                                                                                      |
| 209239_at, 239876_at                               | nuclear factor of kappa light polypeptide gene enhancer in b-cells 1 (p105)                                                                                                                                                                                                                                                                                                                                                                      |
| 243641_at                                          | ,consensus includes gb:be219067 /fea=est /db_xref=gi:8906385 /db_xref=est:hv48b03.x1 /clone=image:3176621 /ug=hs.279643 ests, weakly similar to aluc_human !!!! alu class c warning entry !!! h.sapiens,gb:be219067 /db_xref=gi:8906385 /db_xref=hv48b03.x1 /clone=image:3176621 /fea=est /cnt=4 /tid=hs.279643.0 /tier=consend /stk=3 /ug=hs.279643 /ug_title=ests, weakly similar to aluc_human !!!! alu class c warning entry !!! (h.sapiens) |
| 209270_at                                          | laminin, beta 3                                                                                                                                                                                                                                                                                                                                                                                                                                  |
| 205260_s_at                                        | acylphosphatase 1, erythrocyte (common) type                                                                                                                                                                                                                                                                                                                                                                                                     |
| 243584_at                                          | ,consensus includes gb:aw976035 /fea=est /db_xref=gi:8167258 /db_xref=est:est388144 /ug=hs.292396 ests,gb:aw976035 /db_xref=gi:8167258 /db_xref=est388144 /fea=est /cnt=6 /tid=hs.292396.0 /tier=consend /stk=0 /ug=hs.292396 /ug_title=ests                                                                                                                                                                                                     |
| 214838_at                                          | sft2 domain containing 2                                                                                                                                                                                                                                                                                                                                                                                                                         |
| 1553163_at, 238054_at                              | adp-ribosylhydrolase like 1                                                                                                                                                                                                                                                                                                                                                                                                                      |
| 202285_s_at, 227128_s_at, 202287_s_at              | tumor-associated calcium signal transducer 2                                                                                                                                                                                                                                                                                                                                                                                                     |
| 208836_at, 242836_at, 226570_at, 229709_at         | atpase, na+/k+ transporting, beta 3 polypeptide                                                                                                                                                                                                                                                                                                                                                                                                  |
| 204532_x_at, 207126_x_at, 215125_s_at, 208596_s_at | udp glucuronosyltransferase 1 family, polypeptide a7                                                                                                                                                                                                                                                                                                                                                                                             |
| 228892_at, 235768_at, 243582_at, 238827_at         | sh3 domain containing ring finger 2                                                                                                                                                                                                                                                                                                                                                                                                              |
| 1570058_at, 224431_s_at                            | suppressor of variegation 4-20 homolog 2 (drosophila)                                                                                                                                                                                                                                                                                                                                                                                            |
| 238487_at, 239068_at, 228857_at                    | hypothetical protein loc285831                                                                                                                                                                                                                                                                                                                                                                                                                   |
| 207157_s_at                                        | guanine nucleotide binding protein (g protein), gamma 5                                                                                                                                                                                                                                                                                                                                                                                          |
| 242957_at                                          | von willebrand factor c and egf domains                                                                                                                                                                                                                                                                                                                                                                                                          |
| 243532_at                                          | ,consensus includes gb:aa810788 /fea=est /db_xref=gi:2880399 /db_xref=est:oa82f08.s1 /clone=image:1318791 /ug=hs.123337 ests,gb:aa810788 /db_xref=gi:2880399 /db_xref=oa82f08.s1 /clone=image:1318791 /fea=est /cnt=7 /tid=hs.123337.0 /tier=consend /stk=0 /ug=hs.123337 /ug_title=ests                                                                                                                                                         |

|                                                                              |                                                                                                                                                                                                                                                                                          |
|------------------------------------------------------------------------------|------------------------------------------------------------------------------------------------------------------------------------------------------------------------------------------------------------------------------------------------------------------------------------------|
| 244381_at                                                                    | heat repeat containing 1                                                                                                                                                                                                                                                                 |
| 200920_s_at, 200921_s_at                                                     | b-cell translocation gene 1, anti-proliferative                                                                                                                                                                                                                                          |
| 203967_at, 203968_s_at                                                       | cdc6 cell division cycle 6 homolog (s. cerevisiae)                                                                                                                                                                                                                                       |
| 1565669_at                                                                   | tubulin, alpha 3                                                                                                                                                                                                                                                                         |
| 217894_at, 241903_at                                                         | potassium channel tetramerisation domain containing 3                                                                                                                                                                                                                                    |
| 205396_at, 205398_s_at, 239448_at, 205397_x_at                               | smad, mothers against dpp homolog 3 (drosophila)                                                                                                                                                                                                                                         |
| 205717_x_at, 215836_s_at, 211879_x_at, 209079_x_at, 211876_x_at, 211066_x_at | protocadherin gamma subfamily a, 3                                                                                                                                                                                                                                                       |
| 243458_at                                                                    | ,consensus includes gb:aa968473 /fea=est /db_xref=gi:3143653 /db_xref=est:op49f05.s1 /clone=image:1580193 /ug=hs.212644 ests,gb:aa968473 /db_xref=gi:3143653 /db_xref=op49f05.s1 /clone=image:1580193 /fea=est /cnt=6 /tid=hs.212644.0 /tier=consend /stk=2 /ug=hs.212644 /ug_title=ests |
| 201362_at, 244235_at, 239152_at, 201363_s_at, 206245_s_at                    | influenza virus ns1a binding protein                                                                                                                                                                                                                                                     |
| 1568665_at, 202636_at                                                        | ring finger protein 103                                                                                                                                                                                                                                                                  |
| 1563993_at                                                                   | ,gb:ak092055.1 /db_xref=gi:21750558 /tid=hs2.376609.1 /cnt=1 /fea=mrna /tier=consend /stk=0 /ug=hs.376609 /ug_title=homo sapiens cdna flj34736 fis, clone mesan2008222. /def=homo sapiens cdna flj34736 fis                                                                              |
| 243902_at                                                                    | ,consensus includes gb:ai434868 /fea=est /db_xref=gi:4299190 /db_xref=est:ti13c09.x1 /clone=image:2130352 /ug=hs.161492 ests,gb:ai434868 /db_xref=gi:4299190 /db_xref=ti13c09.x1 /clone=image:2130352 /fea=est /cnt=3 /tid=hs.161492.0 /tier=consend /stk=3 /ug=hs.161492 /ug_title=ests |
| 1564121_at                                                                   | ,gb:ak026788.1 /db_xref=gi:10439723 /tid=hs2.375738.1 /cnt=1 /fea=mrna /tier=consend /stk=0 /ug=hs.375738 /ug_title=homo sapiens cdna: flj23135 fis, clone lng08666. /def=homo sapiens cdna: flj23135 fis                                                                                |
| 1569522_at, 209607_x_at, 1569523_a_at, 210580_x_at, 242114_at, 222094_at     | sulfotransferase family, cytosolic, 1a, phenol-preferring, member 3                                                                                                                                                                                                                      |
| 204401_at                                                                    | potassium intermediate/small conductance calcium-activated channel, subfamily n, member 4                                                                                                                                                                                                |
| 202218_s_at, 243953_at                                                       | fatty acid desaturase 2                                                                                                                                                                                                                                                                  |
| 208949_s_at                                                                  | lectin, galactoside-binding, soluble, 3 (galectin 3)                                                                                                                                                                                                                                     |
| 1568898_at, 203038_at, 233609_at, 233770_at                                  | protein tyrosine phosphatase, receptor type, k                                                                                                                                                                                                                                           |

|                                                                                        |                                                        |                                                                        |
|----------------------------------------------------------------------------------------|--------------------------------------------------------|------------------------------------------------------------------------|
| 1556460_a_at,<br>206298_at,<br>1556459_at                                              | 1560765_a_at,<br>1560764_at,                           | rho gtpase activating protein 22                                       |
| 238296_at                                                                              |                                                        | hypothetical protein mgc26856                                          |
| 1555487_a_at,<br>223874_at                                                             | 218868_at,                                             | arp3 actin-related protein 3 homolog b (yeast)                         |
| 205372_at                                                                              |                                                        | pleiomorphic adenoma gene 1                                            |
| 1554213_at,<br>1554703_at,<br>236807_at                                                | 215139_at,<br>216620_s_at,                             | rho guanine nucleotide exchange factor (gef) 10                        |
| 212408_at,<br>216100_s_at                                                              | 212409_s_at,                                           | torsin a interacting protein 1                                         |
| 219388_at                                                                              |                                                        | grainyhead-like 2 (drosophila)                                         |
| 212705_x_at,<br>213862_at                                                              | 39854_r_at,                                            | patatin-like phospholipase domain containing 2                         |
| 1553349_at,<br>225490_at, 225486_at                                                    | 231090_s_at,                                           | kiaa1557 protein                                                       |
| 206503_x_at,<br>210362_x_at,<br>211588_s_at,<br>239582_at,<br>211014_s_at, 211012_s_at | 209640_at,<br>211013_x_at,<br>235508_at,<br>211589_at, | promyelocytic leukemia                                                 |
| 1555920_at,<br>230998_at, 200037_s_at                                                  | 201091_s_at,                                           | chromobox homolog 3 (hp1 gamma homolog, drosophila)                    |
| 203127_s_at,<br>232867_at,<br>203128_at, 216202_s_at                                   | 225095_at,<br>216203_at,                               | serine palmitoyltransferase, long chain base subunit 2                 |
| 1566900_at,<br>244858_at, 203313_s_at                                                  | 1566901_at,                                            | tgfb-induced factor (tale family homeobox)                             |
| 244748_at                                                                              |                                                        | type ii membrane serine protease                                       |
| 206785_s_at                                                                            |                                                        | killer cell lectin-like receptor subfamily c, member 1                 |
| 215169_at, 230694_at                                                                   |                                                        | solute carrier family 35, member e2                                    |
| 1556113_at, 1556114_a_at                                                               |                                                        | dkfzp451a211 protein                                                   |
| 36564_at                                                                               |                                                        | ibr domain containing 3                                                |
| 1555723_at,<br>225589_at                                                               | 225590_at,                                             | sh3 domain containing ring finger 1                                    |
| 230824_at, 237724_at                                                                   |                                                        | ring finger protein 190                                                |
| 1552470_a_at, 1552800_at                                                               |                                                        | abhydrolase domain containing 11                                       |
| 1561301_at                                                                             |                                                        | hypothetical protein loc151877                                         |
| 207598_x_at                                                                            |                                                        | x-ray repair complementing defective repair in chinese hamster cells 2 |
| 203511_s_at, 203512_at                                                                 |                                                        | trafficking protein particle complex 3                                 |

|                                                                                         |                                                                                                                                                                                                                                                                                                                          |
|-----------------------------------------------------------------------------------------|--------------------------------------------------------------------------------------------------------------------------------------------------------------------------------------------------------------------------------------------------------------------------------------------------------------------------|
| 1563881_at, 239965_at                                                                   | hypothetical protein loc151878                                                                                                                                                                                                                                                                                           |
| 239193_at                                                                               | hypothetical protein loc158301                                                                                                                                                                                                                                                                                           |
| 238150_at                                                                               | hypothetical protein dkfzp547b139                                                                                                                                                                                                                                                                                        |
| 244196_at                                                                               | loc440203                                                                                                                                                                                                                                                                                                                |
| 225313_at                                                                               | chromosome 20 open reading frame 177                                                                                                                                                                                                                                                                                     |
| 1569403_at, 219655_at                                                                   | chromosome 7 open reading frame 10                                                                                                                                                                                                                                                                                       |
| 200773_x_at                                                                             | hypothetical gene supported by bc013859; bc070480                                                                                                                                                                                                                                                                        |
| 1557342_a_at, 238058_at                                                                 | hypothetical protein loc150381                                                                                                                                                                                                                                                                                           |
| 244002_at                                                                               | ,consensus includes gb:bf059284 /fea=est /db_xref=gi:10813180 /db_xref=est:7k57e06.x1 /clone=image:3479530 /ug=hs.232186 ests,gb:bf059284 /db_xref=gi:10813180 /db_xref=7k57e06.x1 /clone=image:3479530 /fea=est /cnt=3 /tid=hs.232186.0 /tier=consend /stk=3 /ug=hs.232186 /ug_title=ests                               |
| 212533_at                                                                               | wee1 homolog (s. pombe)                                                                                                                                                                                                                                                                                                  |
| 223786_at                                                                               | carbohydrate (n-acetylglucosamine 6-o) sulfotransferase 6                                                                                                                                                                                                                                                                |
| 1554949_at                                                                              | hypothetical loc554174                                                                                                                                                                                                                                                                                                   |
| 217831_s_at, 232520_s_at, 232519_at, 220248_x_at, 236951_at                             | p47 (rat)                                                                                                                                                                                                                                                                                                                |
| 205543_at                                                                               | heat shock 70kda protein 4-like                                                                                                                                                                                                                                                                                          |
| 215879_at, 215878_at, 216190_x_at, 1553530_a_at, 211945_s_at, 1553678_a_at, 216178_x_at | integrin, beta 1 (fibronectin receptor, beta polypeptide, antigen cd29 includes mdf2, msk12)                                                                                                                                                                                                                             |
| 205717_x_at, 209079_x_at, 215836_s_at, 211066_x_at                                      | protocadherin gamma subfamily a, 7                                                                                                                                                                                                                                                                                       |
| 244036_at                                                                               | ,consensus includes gb:bf510844 /fea=est /db_xref=gi:11594142 /db_xref=est:ui-h-bi4-apo-e-07-0-ui.s1 /clone=image:3088212 /ug=hs.148782 ests,gb:bf510844 /db_xref=gi:11594142 /db_xref=ui-h-bi4-apo-e-07-0-ui.s1 /clone=image:3088212 /fea=est /cnt=6 /tid=hs.148782.0 /tier=consend /stk=2 /ug=hs.148782 /ug_title=ests |
| 1555821_a_at, 224982_at                                                                 | akt1 substrate 1 (proline-rich)                                                                                                                                                                                                                                                                                          |
| 1553281_at, 233478_at, 235230_at                                                        | phosphatidylinositol-specific phospholipase c, x domain containing 2                                                                                                                                                                                                                                                     |
| 215817_at, 216257_at                                                                    | uv-b repressed sequence, hur 7                                                                                                                                                                                                                                                                                           |
| 204750_s_at, 204751_x_at, 226817_at                                                     | desmocollin 2                                                                                                                                                                                                                                                                                                            |
| 243974_at                                                                               | ,consensus includes gb:ai192452 /fea=est /db_xref=gi:3743661 /db_xref=est:qd03g12.x1 /clone=image:1722694 /ug=hs.167793 ests,gb:ai192452 /db_xref=gi:3743661 /db_xref=qd03g12.x1                                                                                                                                         |

|                                                                                           |                                                                                                                                                                                                                                                                                          |
|-------------------------------------------------------------------------------------------|------------------------------------------------------------------------------------------------------------------------------------------------------------------------------------------------------------------------------------------------------------------------------------------|
|                                                                                           | /clone=image:1722694 /fea=est /cnt=6 /tid=hs.167793.0 /tier=consend /stk=2 /ug=hs.167793 /ug_title=ests                                                                                                                                                                                  |
| 240478_at                                                                                 | ,consensus includes gb:aa648983 /fea=est /db_xref=gi:2575412 /db_xref=est:ns41f06.s1 /clone=image:1186211 /ug=hs.212911 ests,gb:aa648983 /db_xref=gi:2575412 /db_xref=ns41f06.s1 /clone=image:1186211 /fea=est /cnt=4 /tid=hs.212911.0 /tier=consend /stk=4 /ug=hs.212911 /ug_title=ests |
| 212670_at, 216269_s_at                                                                    | elastin (supravalvular aortic stenosis, williams-beuren syndrome)                                                                                                                                                                                                                        |
| 203581_at, 203582_s_at                                                                    | rab4a, member ras oncogene family                                                                                                                                                                                                                                                        |
| 220434_at, 242609_x_at, 227324_at                                                         | aarf domain containing kinase 4                                                                                                                                                                                                                                                          |
| 212824_at                                                                                 | far upstream element (fuse) binding protein 3                                                                                                                                                                                                                                            |
| 207506_at, 230095_at, 214205_x_at, 209080_x_at                                            | thioredoxin-like 2                                                                                                                                                                                                                                                                       |
| 204952_at                                                                                 | ly6/plaur domain containing 3                                                                                                                                                                                                                                                            |
| 1554364_at, 1554365_a_at, 201877_s_at, 214083_at, 237181_at, 213305_s_at, 1557718_at      | protein phosphatase 2, regulatory subunit b (b56), gamma isoform                                                                                                                                                                                                                         |
| 201015_s_at                                                                               | junction plakoglobin                                                                                                                                                                                                                                                                     |
| 1552735_at, 205717_x_at, 209079_x_at, 215836_s_at, 211066_x_at                            | protocadherin gamma subfamily a, 4                                                                                                                                                                                                                                                       |
| 200047_s_at, 213494_s_at, 224718_at, 224711_at, 201902_s_at, 201901_s_at                  | yy1 transcription factor                                                                                                                                                                                                                                                                 |
| 218263_s_at, 242552_x_at, 240381_at                                                       | transposon-derived buster1 transposase-like protein gene                                                                                                                                                                                                                                 |
| 236067_at, 230688_at, 232369_at, 232978_at, 232138_at, 205017_s_at, 236699_at, 1560137_at | muscleblind-like 2 (drosophila)                                                                                                                                                                                                                                                          |
| 220547_s_at, 233048_at                                                                    | family with sequence similarity 35, member a                                                                                                                                                                                                                                             |
| 205573_s_at                                                                               | dkfzp564f052 protein                                                                                                                                                                                                                                                                     |
| 200983_x_at, 200984_s_at, 200985_s_at, 228748_at, 212463_at                               | cd59 antigen, complement regulatory protein                                                                                                                                                                                                                                              |
| 201240_s_at, 243570_at                                                                    | signal peptidase complex subunit 2 homolog (s. cerevisiae)                                                                                                                                                                                                                               |
| 232710_at                                                                                 | hypothetical gene supported by ak024602                                                                                                                                                                                                                                                  |
| 1555374_at, 244078_at, 224908_s_at                                                        | tubulin tyrosine ligase                                                                                                                                                                                                                                                                  |



|                                                    |                           |                                                                                                                                                                                                                                                                                                                                                                                                         |
|----------------------------------------------------|---------------------------|---------------------------------------------------------------------------------------------------------------------------------------------------------------------------------------------------------------------------------------------------------------------------------------------------------------------------------------------------------------------------------------------------------|
| 1559939_at,<br>1559940_s_at,<br>1560628_at         | 243085_at,<br>1569900_at, | flj16124 protein                                                                                                                                                                                                                                                                                                                                                                                        |
| 1568805_at, 243807_at                              |                           | nuclear receptor coactivator 7                                                                                                                                                                                                                                                                                                                                                                          |
| 212964_at,<br>233256_at,<br>216911_s_at, 212965_at | 212966_at,<br>233374_at,  | hypermethylated in cancer 2                                                                                                                                                                                                                                                                                                                                                                             |
| 1558557_at,<br>240516_at                           | 203173_s_at,              | esophageal cancer associated protein                                                                                                                                                                                                                                                                                                                                                                    |
| 1558590_at,<br>223988_x_at, 218366_x_at            | 223528_s_at,              | flj20859 gene                                                                                                                                                                                                                                                                                                                                                                                           |
| 216552_x_at                                        |                           | killer cell immunoglobulin-like receptor, two domains, long cytoplasmic tail, 3                                                                                                                                                                                                                                                                                                                         |
| 207785_s_at,<br>211974_x_at                        | 229540_at,                | recombining binding protein suppressor of hairless (drosophila)                                                                                                                                                                                                                                                                                                                                         |
| 203236_s_at                                        |                           | lectin, galactoside-binding, soluble, 9 (galectin 9)                                                                                                                                                                                                                                                                                                                                                    |
| 1565669_at                                         |                           | loc88851                                                                                                                                                                                                                                                                                                                                                                                                |
| 207591_s_at,<br>212152_x_at, 234159_at             | 210649_s_at,              | at rich interactive domain 1a (swi- like)                                                                                                                                                                                                                                                                                                                                                               |
| 202755_s_at,<br>214858_at                          | 202756_s_at,              | glypican 1                                                                                                                                                                                                                                                                                                                                                                                              |
| 207126_x_at,<br>215125_s_at, 208596_s_at           | 204532_x_at,              | udp glucuronosyltransferase 1 family, polypeptide a4                                                                                                                                                                                                                                                                                                                                                    |
| 1554026_a_at,<br>240493_at, 201976_s_at            | 243159_x_at,              | myosin x                                                                                                                                                                                                                                                                                                                                                                                                |
| 1553888_at                                         |                           | lactate dehydrogenase a-like 6a                                                                                                                                                                                                                                                                                                                                                                         |
| 220266_s_at, 221841_s_at                           |                           | kruppel-like factor 4 (gut)                                                                                                                                                                                                                                                                                                                                                                             |
| 240557_at                                          |                           | ,consensus includes gb:n34514 /fea=est /db_xref=gi:1155656 /db_xref=est:yy55b03.s1 /clone=image:277421 /ug=hs.41272 ests, weakly similar to e41925 hypothetical protein 3 h.sapiens,gb:n34514 /db_xref=gi:1155656 /db_xref=yy55b03.s1 /clone=image:277421 /fea=est /cnt=4 /tid=hs.41272.0 /tier=consend /stk=4 /ug=hs.41272 /ug_title=ests, weakly similar to e41925 hypothetical protein 3 (h.sapiens) |
| 1570076_at, 214969_at                              |                           | mitogen-activated protein kinase kinase kinase 9                                                                                                                                                                                                                                                                                                                                                        |
| 1563560_at,<br>235281_x_at,<br>220016_at           | 211986_at,<br>238855_at,  | ahnak nucleoprotein (desmoyokin)                                                                                                                                                                                                                                                                                                                                                                        |
| 207893_at                                          |                           | sex determining region y                                                                                                                                                                                                                                                                                                                                                                                |
| 214580_x_at                                        |                           | keratin 6e                                                                                                                                                                                                                                                                                                                                                                                              |
| 207667_s_at,                                       | 215499_at,                | mitogen-activated protein kinase kinase 3                                                                                                                                                                                                                                                                                                                                                               |

|                                                                        |                                                                             |
|------------------------------------------------------------------------|-----------------------------------------------------------------------------|
| 215498_s_at                                                            |                                                                             |
| 218585_s_at, 222680_s_at                                               | denticleless homolog (drosophila)                                           |
| 228138_at, 242621_at                                                   | zinc finger protein 498                                                     |
| 208534_s_at, 212706_at, 212707_s_at                                    | hypothetical protein flj21767                                               |
| 206200_s_at, 214783_s_at                                               | annexin a11                                                                 |
| 1555062_s_at                                                           | gtp binding protein 3 (mitochondrial)                                       |
| 212106_at, 212108_at                                                   | ubx domain containing 8                                                     |
| 208898_at, 214923_at, 208899_x_at                                      | atpase, h+ transporting, lysosomal 34kda, v1 subunit d                      |
| 227060_at                                                              | tumor necrosis factor receptor superfamily, member 19-like                  |
| 204492_at                                                              | rho gtpase activating protein 11a                                           |
| 203515_s_at                                                            | phosphomevalonate kinase                                                    |
| 232710_at                                                              | similar to williams beuren syndrome chromosome region 19                    |
| 228823_at                                                              | dna directed rna polymerase ii polypeptide j, isoform c                     |
| 200709_at, 210187_at, 214119_s_at, 210186_s_at, 236669_at              | fk506 binding protein 1a, 12kda                                             |
| 201231_s_at, 237691_x_at, 204483_at                                    | enolase 1, (alpha)                                                          |
| 209461_x_at                                                            | wd repeat domain 18                                                         |
| 1556346_at, 224583_at, 221059_s_at                                     | coactosin-like 1 (dictyostelium)                                            |
| 209191_at                                                              | tubulin, beta 6                                                             |
| 1560017_at, 226600_at, 226604_at                                       | transmembrane and tetratricopeptide repeat containing 3                     |
| 1558477_at, 230533_at, 243814_at, 239991_at, 214795_at, 209048_s_at    | protein kinase c binding protein 1                                          |
| 200796_s_at, 214057_at, 227175_at, 214056_at, 200797_s_at, 200798_x_at | myeloid cell leukemia sequence 1 (bcl2-related)                             |
| 201154_x_at, 211710_x_at                                               | ribosomal protein l4                                                        |
| 204765_at, 228596_at                                                   | rho guanine nucleotide exchange factor (gef) 5                              |
| 238151_at                                                              | afg3 atpase family gene 3-like 2 (yeast)                                    |
| 211926_s_at, 236455_at                                                 | myosin, heavy polypeptide 9, non-muscle                                     |
| 214831_at, 225159_s_at                                                 | mediator of rna polymerase ii transcription, subunit 28 homolog (yeast)     |
| 200813_s_at, 200815_s_at, 211547_s_at, 200816_s_at, 244328_x_at        | platelet-activating factor acetylhydrolase, isoform ib, alpha subunit 45kda |

|                                                             |                                          |                                                                                                                                                                                                                                                                                          |
|-------------------------------------------------------------|------------------------------------------|------------------------------------------------------------------------------------------------------------------------------------------------------------------------------------------------------------------------------------------------------------------------------------------|
| 218292_s_at,<br>231224_x_at,<br>238361_s_at,<br>233748_x_at | 222582_at,<br>236670_s_at,<br>238319_at, | protein kinase, amp-activated, gamma 2 non-catalytic subunit                                                                                                                                                                                                                             |
| 202535_at                                                   |                                          | fas (tnfrsf6)-associated via death domain                                                                                                                                                                                                                                                |
| 1553539_at, 231583_at                                       |                                          | keratin 6 irs4                                                                                                                                                                                                                                                                           |
| 226602_s_at                                                 |                                          | similar to breakpoint cluster region isoform 1                                                                                                                                                                                                                                           |
| 205680_at                                                   |                                          | matrix metalloproteinase 10 (stromelysin 2)                                                                                                                                                                                                                                              |
| 213035_at, 226025_at, 229307_at                             |                                          | ankyrin repeat domain 28                                                                                                                                                                                                                                                                 |
| 206429_at                                                   |                                          | coagulation factor ii (thrombin) receptor-like 1                                                                                                                                                                                                                                         |
| 1560695_at,<br>219178_at                                    | 1560696_x_at,                            | queuine trna-ribosyltransferase domain containing 1                                                                                                                                                                                                                                      |
| 200650_s_at                                                 |                                          | lactate dehydrogenase a                                                                                                                                                                                                                                                                  |
| 219513_s_at, 222169_x_at                                    |                                          | sh2 domain containing 3a                                                                                                                                                                                                                                                                 |
| 206127_at, 221773_at                                        |                                          | elk3, ets-domain protein (srf accessory protein 2)                                                                                                                                                                                                                                       |
| 201403_s_at, 233307_x_at                                    |                                          | microsomal glutathione s-transferase 3                                                                                                                                                                                                                                                   |
| 1555529_at, 206050_s_at                                     |                                          | ribonuclease/angiogenin inhibitor 1                                                                                                                                                                                                                                                      |
| 207069_s_at,<br>213565_s_at,                                | 209886_s_at,<br>209887_at                | smad, mothers against dpp homolog 6 (drosophila)                                                                                                                                                                                                                                         |
| 208515_at                                                   |                                          | histone 1, h2bm                                                                                                                                                                                                                                                                          |
| 218414_s_at,<br>230219_at                                   | 222625_s_at,                             | nude nuclear distribution gene e homolog 1 (a. nidulans)                                                                                                                                                                                                                                 |
| 1560636_a_at                                                |                                          | hspc081                                                                                                                                                                                                                                                                                  |
| 227263_at, 236296_x_at                                      |                                          | pdz-lim protein mystique                                                                                                                                                                                                                                                                 |
| 213923_at,<br>238622_at,                                    | 214487_s_at,<br>214488_at                | rap2b, member of ras oncogene family                                                                                                                                                                                                                                                     |
| 219874_at, 240612_at                                        |                                          | hypothetical protein flj23188                                                                                                                                                                                                                                                            |
| 1568883_at, 225081_s_at                                     |                                          | cell division cycle associated 7-like                                                                                                                                                                                                                                                    |
| 240828_at                                                   |                                          | ,consensus includes gb:aw665239 /fea=est /db_xref=gi:7457785 /db_xref=est:hi88d11.x1 /clone=image:2979381 /ug=hs.187778 ests,gb:aw665239 /db_xref=gi:7457785 /db_xref=hi88d11.x1 /clone=image:2979381 /fea=est /cnt=5 /tid=hs.187778.0 /tier=consend /stk=4 /ug=hs.187778 /ug_title=ests |
| 206785_s_at                                                 |                                          | killer cell lectin-like receptor subfamily c, member 2                                                                                                                                                                                                                                   |
| 223815_at, 243206_at, 225705_at                             |                                          | coiled-coil domain containing 45                                                                                                                                                                                                                                                         |
| 1555153_s_at,<br>228220_at,                                 | 1565978_a_at,<br>1565976_at              | fch domain only 2                                                                                                                                                                                                                                                                        |
| 204800_s_at,<br>204801_s_at                                 | 231345_s_at,                             | hypothetical protein flj13639                                                                                                                                                                                                                                                            |
| 200892_s_at,<br>200893_at                                   | 210180_s_at,                             | splicing factor, arginine/serine-rich 10 (transformer 2 homolog, drosophila)                                                                                                                                                                                                             |

|                                                                        |                                                                                                                                                                                                                                                                                          |
|------------------------------------------------------------------------|------------------------------------------------------------------------------------------------------------------------------------------------------------------------------------------------------------------------------------------------------------------------------------------|
| 238495_at                                                              | leucine rich repeat containing 57                                                                                                                                                                                                                                                        |
| 225847_at, 244086_at                                                   | arylamide deacetylase-like 1                                                                                                                                                                                                                                                             |
| 200033_at                                                              | dead (asp-glu-ala-asp) box polypeptide 5                                                                                                                                                                                                                                                 |
| 228226_s_at, 229931_at,<br>228294_s_at                                 | hypothetical protein mgc33584                                                                                                                                                                                                                                                            |
| 216186_at                                                              | chromosome 1 open reading frame 20                                                                                                                                                                                                                                                       |
| 219125_s_at                                                            | recombination activating gene 1 activating protein 1                                                                                                                                                                                                                                     |
| 1552258_at, 236595_at                                                  | hypothetical protein mgc4677                                                                                                                                                                                                                                                             |
| 212908_at, 212911_at                                                   | dnaj (hsp40) homolog, subfamily c, member 16                                                                                                                                                                                                                                             |
| 219598_s_at                                                            | rwd domain containing 1                                                                                                                                                                                                                                                                  |
| 201920_at, 230494_at                                                   | solute carrier family 20 (phosphate transporter), member 1                                                                                                                                                                                                                               |
| 203965_at                                                              | ubiquitin specific peptidase 20                                                                                                                                                                                                                                                          |
| 220602_s_at, 223326_s_at                                               | hypothetical protein flj22795                                                                                                                                                                                                                                                            |
| 218399_s_at                                                            | cell division cycle associated 4                                                                                                                                                                                                                                                         |
| 209517_s_at                                                            | ash2 (absent, small, or homeotic)-like (drosophila)                                                                                                                                                                                                                                      |
| 1560762_at                                                             | hypothetical protein loc285972                                                                                                                                                                                                                                                           |
| 204385_at, 241305_at,<br>217388_s_at, 210662_at,<br>210663_s_at        | kynureninase (l-kynurenine hydrolase)                                                                                                                                                                                                                                                    |
| 205401_at, 225114_at, 225113_at                                        | alkylglycerone phosphate synthase                                                                                                                                                                                                                                                        |
| 203823_at, 220300_at,<br>233390_at, 232223_at,<br>233395_at, 239744_at | regulator of g-protein signalling 3                                                                                                                                                                                                                                                      |
| 206330_s_at                                                            | shc (src homology 2 domain containing) transforming protein 3                                                                                                                                                                                                                            |
| 208806_at, 208807_s_at                                                 | chromodomain helicase dna binding protein 3                                                                                                                                                                                                                                              |
| 219990_at                                                              | e2f transcription factor 8                                                                                                                                                                                                                                                               |
| 217875_s_at, 237166_at                                                 | transmembrane, prostate androgen induced rna                                                                                                                                                                                                                                             |
| 240923_at                                                              | ,consensus includes gb:ai742957 /fea=est /db_xref=gi:5111245 /db_xref=est:wg76d04.x1 /clone=image:2371015 /ug=hs.271569 ests,gb:ai742957 /db_xref=gi:5111245 /db_xref=wg76d04.x1 /clone=image:2371015 /fea=est /cnt=5 /tid=hs.271569.0 /tier=consend /stk=4 /ug=hs.271569 /ug_title=ests |
| 1556468_at, 1556469_s_at                                               | hypothetical gene supported by ak091930                                                                                                                                                                                                                                                  |
| 209340_at                                                              | udp-n-acteylglucosamine pyrophosphorylase 1                                                                                                                                                                                                                                              |
| 200013_at, 214143_x_at                                                 | ribosomal protein l24                                                                                                                                                                                                                                                                    |
| 240948_at                                                              | ,consensus includes gb:t79640 /fea=est /db_xref=gi:698149 /db_xref=est:y71g09.s1 /clone=image:113728 /ug=hs.177864 ests,gb:t79640 /db_xref=gi:698149 /db_xref=y71g09.s1 /clone=image:113728 /fea=est /cnt=4 /tid=hs.177864.0 /tier=consend /stk=4 /ug=hs.177864 /ug_title=ests           |
| 1555245_s_at                                                           | retinitis pigmentosa 1-like 1                                                                                                                                                                                                                                                            |

|                                                                                |                                                                                                                                                                                                                                                                                            |
|--------------------------------------------------------------------------------|--------------------------------------------------------------------------------------------------------------------------------------------------------------------------------------------------------------------------------------------------------------------------------------------|
| 208203_x_at, 211397_x_at                                                       | killer cell immunoglobulin-like receptor, two domains, long cytoplasmic tail, 2                                                                                                                                                                                                            |
| 224093_at                                                                      | interferon, kappa                                                                                                                                                                                                                                                                          |
| 225770_at, 225774_at, 225773_at                                                | ring finger and spry domain containing 1                                                                                                                                                                                                                                                   |
| 1598_g_at, 202177_at, 238127_at, 238097_at                                     | growth arrest-specific 6                                                                                                                                                                                                                                                                   |
| 220157_x_at                                                                    | pleckstrin homology domain containing, family a (phosphoinositide binding specific) member 9                                                                                                                                                                                               |
| 1557910_at, 200064_at, 214359_s_at                                             | heat shock protein 90kda alpha (cytosolic), class b member 1                                                                                                                                                                                                                               |
| 205717_x_at, 211066_x_at, 211876_x_at, 215836_s_at, 211875_x_at, 209079_x_at   | protocadherin gamma subfamily a, 10                                                                                                                                                                                                                                                        |
| 201711_x_at, 201713_s_at, 226922_at, 201712_s_at                               | ran binding protein 2                                                                                                                                                                                                                                                                      |
| 205129_at                                                                      | nucleophosmin/nucleoplasmin, 3                                                                                                                                                                                                                                                             |
| 1562640_at                                                                     | hypothetical protein loc285943                                                                                                                                                                                                                                                             |
| 206632_s_at                                                                    | apolipoprotein b mrna editing enzyme, catalytic polypeptide-like 3b                                                                                                                                                                                                                        |
| 235753_at                                                                      | hypothetical protein loc285944                                                                                                                                                                                                                                                             |
| 209339_at                                                                      | seven in absentia homolog 2 (drosophila)                                                                                                                                                                                                                                                   |
| 243938_x_at, 232381_s_at                                                       | dynein, axonemal, heavy polypeptide 5                                                                                                                                                                                                                                                      |
| 240256_at                                                                      | zinc finger protein 367                                                                                                                                                                                                                                                                    |
| 1555996_s_at, 200912_s_at                                                      | eukaryotic translation initiation factor 4a, isoform 2                                                                                                                                                                                                                                     |
| 218923_at, 218924_s_at                                                         | chitinase, di-n-acetyl-                                                                                                                                                                                                                                                                    |
| 1568765_at, 202628_s_at, 202627_s_at                                           | serpin peptidase inhibitor, clade e (nexin, plasminogen activator inhibitor type 1), member 1                                                                                                                                                                                              |
| 221799_at, 55093_at                                                            | chondroitin sulfate glucuronyltransferase                                                                                                                                                                                                                                                  |
| 214806_at, 240461_at, 242228_at, 242052_at, 204741_at, 1556051_a_at, 228691_at | bicaudal d homolog 1 (drosophila)                                                                                                                                                                                                                                                          |
| 1565669_at                                                                     | region containing high-mobility group (nonhistone chromosomal) protein 17; hypothetical protein mgc5629                                                                                                                                                                                    |
| 1552835_at, 1557309_at                                                         | denn/madd domain containing 1b                                                                                                                                                                                                                                                             |
| 241063_at                                                                      | ,consensus includes gb:be672556 /fea=est /db_xref=gi:10033097 /db_xref=est:7b70a09.x1 /clone=image:3233560 /ug=hs.271200 ests,gb:be672556 /db_xref=gi:10033097 /db_xref=7b70a09.x1 /clone=image:3233560 /fea=est /cnt=4 /tid=hs.271200.0 /tier=consend /stk=4 /ug=hs.271200 /ug_title=ests |
| 1570173_at, 240266_at, 218783_at, 222250_s_at                                  | chromosome 1 open reading frame 73                                                                                                                                                                                                                                                         |

|                                                                                                         |                                                                                                                                                                                                                                                                                                    |
|---------------------------------------------------------------------------------------------------------|----------------------------------------------------------------------------------------------------------------------------------------------------------------------------------------------------------------------------------------------------------------------------------------------------|
| 204460_s_at, 235253_at,<br>210216_x_at, 204461_x_at                                                     | rad1 homolog (s. pombe)                                                                                                                                                                                                                                                                            |
| 1570567_at                                                                                              | ,gb:bc031996.1 /db_xref=gi:21594241 /tid=hs2.382631.1 /cnt=5<br>/fea=mrna /tier=consend /stk=0 /ug=hs.382631 /ug_title=homo<br>sapiens, clone image:4753178, mrna /def=homo sapiens, mrna.                                                                                                         |
| 1555536_at, 225524_at                                                                                   | anthrax toxin receptor 2                                                                                                                                                                                                                                                                           |
| 1570566_at                                                                                              | ,gb:aa604601 /db_xref=gi:2445465 /db_xref=no76d07.s1<br>/clone=image:1112749 /tid=hs2.382631.1 /cnt=5 /fea=mrna<br>/tier=consend /stk=1 /ug=hs.382631 /ug_title=homo sapiens, clone<br>image:4753178, mrna                                                                                         |
| 1560230_at, 1564192_at,<br>202565_s_at, 215279_at,<br>229988_at, 202566_s_at,<br>1569512_at, 1562059_at | supervillin                                                                                                                                                                                                                                                                                        |
| 213075_at                                                                                               | olfactomedin-like 2a                                                                                                                                                                                                                                                                               |
| 212689_s_at, 242758_x_at                                                                                | jumonji domain containing 1a                                                                                                                                                                                                                                                                       |
| 225801_at, 225803_at, 232573_at                                                                         | f-box protein 32                                                                                                                                                                                                                                                                                   |
| 218113_at, 233309_at                                                                                    | transmembrane protein 2                                                                                                                                                                                                                                                                            |
| 1555255_a_at, 204578_at                                                                                 | histidine acid phosphatase domain containing 2a                                                                                                                                                                                                                                                    |
| 205385_at, 211832_s_at,<br>205386_s_at, 217373_x_at,<br>237891_at                                       | mdm2, transformed 3t3 cell double minute 2, p53 binding protein<br>(mouse)                                                                                                                                                                                                                         |
| 200720_s_at, 236713_at,<br>200721_s_at                                                                  | arp1 actin-related protein 1 homolog a, contractin alpha (yeast)                                                                                                                                                                                                                                   |
| 241121_at                                                                                               | ,consensus includes gb:aa426064 /fea=est /db_xref=gi:2106552<br>/db_xref=est:zv52a05.s1 /clone=image:757232 /ug=hs.190117<br>ests,gb:aa426064 /db_xref=gi:2106552 /db_xref=zv52a05.s1<br>/clone=image:757232 /fea=est /cnt=5 /tid=hs.190117.0 /tier=consend<br>/stk=4 /ug=hs.190117 /ug_title=ests |
| 238157_at                                                                                               | vacuolar protein sorting 24 (yeast)                                                                                                                                                                                                                                                                |
| 1553277_at, 227072_at,<br>1557388_at                                                                    | rotatin                                                                                                                                                                                                                                                                                            |
| 219777_at, 229367_s_at                                                                                  | immune associated nucleotide 2                                                                                                                                                                                                                                                                     |
| 240931_s_at                                                                                             | programmed cell death 6                                                                                                                                                                                                                                                                            |
| 1569444_at, 229658_at,<br>213336_at, 208445_s_at                                                        | williams-beuren syndrome chromosome region 10                                                                                                                                                                                                                                                      |
| 238032_at, 241515_at, 202481_at                                                                         | dehydrogenase/reductase (sdr family) member 3                                                                                                                                                                                                                                                      |
| 226575_at, 232393_at                                                                                    | zinc finger protein 462                                                                                                                                                                                                                                                                            |
| 218348_s_at, 226897_s_at                                                                                | zinc finger ccch-type containing 7a                                                                                                                                                                                                                                                                |
| 225327_at, 236237_at, 235193_at                                                                         | kiaa1370                                                                                                                                                                                                                                                                                           |
| 217588_at                                                                                               | cation channel, sperm associated 2 pseudogene                                                                                                                                                                                                                                                      |

|                                                                                                                                                                                           |                                                                                                                                                                                                                                                                                                                                                                                  |
|-------------------------------------------------------------------------------------------------------------------------------------------------------------------------------------------|----------------------------------------------------------------------------------------------------------------------------------------------------------------------------------------------------------------------------------------------------------------------------------------------------------------------------------------------------------------------------------|
| 208917_x_at, 208918_s_at,<br>208919_s_at, 213613_s_at,<br>215159_s_at, 213607_x_at                                                                                                        | nad kinase                                                                                                                                                                                                                                                                                                                                                                       |
| 212542_s_at                                                                                                                                                                               | pleckstrin homology domain interacting protein                                                                                                                                                                                                                                                                                                                                   |
| 211541_s_at, 211079_s_at,<br>209033_s_at, 239308_at,<br>1559551_at                                                                                                                        | dual-specificity tyrosine-(y)-phosphorylation regulated kinase 1a                                                                                                                                                                                                                                                                                                                |
| 202014_at, 37028_at                                                                                                                                                                       | protein phosphatase 1, regulatory (inhibitor) subunit 15a                                                                                                                                                                                                                                                                                                                        |
| 243526_at                                                                                                                                                                                 | hypothetical protein loc349136                                                                                                                                                                                                                                                                                                                                                   |
| 232464_at                                                                                                                                                                                 | tripartite motif-containing pseudogene 1                                                                                                                                                                                                                                                                                                                                         |
| 219953_s_at, 242515_x_at                                                                                                                                                                  | chromosome 11 open reading frame 17                                                                                                                                                                                                                                                                                                                                              |
| 209804_at                                                                                                                                                                                 | dna cross-link repair 1a (pso2 homolog, s. cerevisiae)                                                                                                                                                                                                                                                                                                                           |
| 218537_at, 45714_at                                                                                                                                                                       | host cell factor c1 regulator 1 (xpo1 dependent)                                                                                                                                                                                                                                                                                                                                 |
| 1553675_at, 225596_at                                                                                                                                                                     | kinesin light chain 4                                                                                                                                                                                                                                                                                                                                                            |
| 211805_s_at, 235518_at,<br>241041_at, 244620_at,<br>210804_x_at, 207053_at,<br>1565306_a_at, 1564985_a_at,<br>1561615_s_at, 1561614_at,<br>1557829_at, 241752_at,<br>238546_at, 233816_at | solute carrier family 8 (sodium/calcium exchanger), member 1                                                                                                                                                                                                                                                                                                                     |
| 226763_at                                                                                                                                                                                 | sec14 and spectrin domains 1                                                                                                                                                                                                                                                                                                                                                     |
| 241175_at                                                                                                                                                                                 | ,consensus includes gb:ai357605 /fea=est /db_xref=gi:4109226 /db_xref=est:qu20f04.x1 /clone=image:1965343 /ug=hs.157254 ests, weakly similar to putative p150 h.sapiens,gb:ai357605 /db_xref=gi:4109226 /db_xref=qu20f04.x1 /clone=image:1965343 /fea=est /cnt=4 /tid=hs.157254.0 /tier=consend /stk=4 /ug=hs.157254 /ug_title=ests, weakly similar to putative p150 (h.sapiens) |
| 202712_s_at, 235452_at                                                                                                                                                                    | creatine kinase, mitochondrial 1b                                                                                                                                                                                                                                                                                                                                                |
| 209263_x_at, 209264_s_at                                                                                                                                                                  | tetraspanin 4                                                                                                                                                                                                                                                                                                                                                                    |
| 223014_at, 226954_at                                                                                                                                                                      | ubiquitin-conjugating enzyme e2r 2                                                                                                                                                                                                                                                                                                                                               |
| 225411_at, 225412_at, 241445_at                                                                                                                                                           | transmembrane protein 87b                                                                                                                                                                                                                                                                                                                                                        |
| 205264_at                                                                                                                                                                                 | cd3e antigen, epsilon polypeptide associated protein                                                                                                                                                                                                                                                                                                                             |
| 223852_s_at, 225015_s_at                                                                                                                                                                  | serine/threonine kinase 40                                                                                                                                                                                                                                                                                                                                                       |
| 219222_at, 57540_at                                                                                                                                                                       | ribokinase                                                                                                                                                                                                                                                                                                                                                                       |
| 202491_s_at, 202490_at                                                                                                                                                                    | inhibitor of kappa light polypeptide gene enhancer in b-cells, kinase complex-associated protein                                                                                                                                                                                                                                                                                 |
| 224146_s_at                                                                                                                                                                               | atp-binding cassette transporter mrp8                                                                                                                                                                                                                                                                                                                                            |
| 1557081_at, 212030_at,<br>212033_at, 236613_at,<br>212031_at, 212028_at                                                                                                                   | rna binding motif protein 25                                                                                                                                                                                                                                                                                                                                                     |

|                                                                               |                                                                                                                                                  |
|-------------------------------------------------------------------------------|--------------------------------------------------------------------------------------------------------------------------------------------------|
| 1563573_at, 218501_at                                                         | rho guanine nucleotide exchange factor (gef) 3                                                                                                   |
| 219024_at, 226247_at                                                          | pleckstrin homology domain containing, family a (phosphoinositide binding specific) member 1                                                     |
| 209294_x_at, 209295_at,<br>210405_x_at                                        | tumor necrosis factor receptor superfamily, member 10b                                                                                           |
| 1555811_at, 201288_at,<br>1555812_a_at                                        | rho gdp dissociation inhibitor (gdi) beta                                                                                                        |
| 1552923_a_at, 1552924_a_at,<br>1562550_at, 232950_s_at                        | phosphatidylinositol transfer protein, membrane-associated 2                                                                                     |
| 219177_at, 239298_at                                                          | brix domain containing 2                                                                                                                         |
| 204615_x_at, 242065_x_at,<br>208881_x_at                                      | isopentenyl-diphosphate delta isomerase 1                                                                                                        |
| 209699_x_at, 244266_at,<br>217626_at                                          | aldo-keto reductase family 1, member c2 (dihydrodiol dehydrogenase 2; bile acid binding protein; 3-alpha hydroxysteroid dehydrogenase, type iii) |
| 206277_at                                                                     | purinergic receptor p2y, g-protein coupled, 2                                                                                                    |
| 205436_s_at, 213344_s_at,<br>212525_s_at                                      | h2a histone family, member x                                                                                                                     |
| 211031_s_at, 237534_at                                                        | cytoplasmic linker 2                                                                                                                             |
| 220800_s_at, 223078_s_at,<br>223077_at                                        | tropomodulin 3 (ubiquitous)                                                                                                                      |
| 220048_at                                                                     | ectodysplasin a receptor                                                                                                                         |
| 202987_at                                                                     | chromosome 6 open reading frame 5                                                                                                                |
| 224764_at, 237903_at                                                          | rho gtpase activating protein 21                                                                                                                 |
| 208600_s_at, 238384_x_at,<br>238390_at                                        | g protein-coupled receptor 39                                                                                                                    |
| 213793_s_at                                                                   | homer homolog 1 (drosophila)                                                                                                                     |
| 1555780_a_at, 201452_at,<br>213409_s_at, 241795_at,<br>227633_at, 201453_x_at | ras homolog enriched in brain                                                                                                                    |
| 223627_at                                                                     | ring finger and kh domain containing 3                                                                                                           |
| 209579_s_at, 214048_at,<br>209580_s_at, 214047_s_at                           | methyl-cpg binding domain protein 4                                                                                                              |
| 1558393_at, 1558394_s_at,<br>214031_s_at, 209016_s_at                         | keratin 7                                                                                                                                        |
| 1552897_a_at, 1552898_a_at                                                    | potassium voltage-gated channel, subfamily g, member 3                                                                                           |
| 1558947_at, 213599_at,<br>1558948_a_at                                        | opa interacting protein 5                                                                                                                        |
| 208153_s_at                                                                   | fat tumor suppressor homolog 2 (drosophila)                                                                                                      |
| 219749_at                                                                     | sh2 domain containing 4a                                                                                                                         |
| 204285_s_at, 204286_s_at                                                      | phorbol-12-myristate-13-acetate-induced protein 1                                                                                                |



|                                                                    |                              |                                                                                                                                                                                                                                                                                          |
|--------------------------------------------------------------------|------------------------------|------------------------------------------------------------------------------------------------------------------------------------------------------------------------------------------------------------------------------------------------------------------------------------------|
| 1553039_a_at,<br>1564537_a_at                                      | 1564536_at,                  | ankyrin repeat and socs box-containing 10                                                                                                                                                                                                                                                |
| 241391_at                                                          |                              | ,consensus includes gb:aa654772 /fea=est /db_xref=gi:2590926 /db_xref=est:nt73f05.s1 /clone=image:1204161 /ug=hs.186564 ests,gb:aa654772 /db_xref=gi:2590926 /db_xref=nt73f05.s1 /clone=image:1204161 /fea=est /cnt=7 /tid=hs.186564.0 /tier=consend /stk=0 /ug=hs.186564 /ug_title=ests |
| 204136_at                                                          |                              | collagen, type vii, alpha 1 (epidermolysis bullosa, dystrophic, dominant and recessive)                                                                                                                                                                                                  |
| 205798_at                                                          |                              | interleukin 7 receptor                                                                                                                                                                                                                                                                   |
| 225299_at,<br>237505_at, 240830_at, 240006_at                      | 225301_s_at,                 | myosin vb                                                                                                                                                                                                                                                                                |
| 207178_s_at                                                        |                              | fyn-related kinase                                                                                                                                                                                                                                                                       |
| 241306_at                                                          |                              | ,consensus includes gb:ai346649 /fea=est /db_xref=gi:4083855 /db_xref=est:qp52a06.x1 /clone=image:1926610 /ug=hs.165009 ests,gb:ai346649 /db_xref=gi:4083855 /db_xref=qp52a06.x1 /clone=image:1926610 /fea=est /cnt=4 /tid=hs.165009.0 /tier=consend /stk=4 /ug=hs.165009 /ug_title=ests |
| 1569243_at,<br>212719_at                                           | 210919_at,                   | ph domain and leucine rich repeat protein phosphatase                                                                                                                                                                                                                                    |
| 240646_at                                                          |                              | gtpase, imap family member 8                                                                                                                                                                                                                                                             |
| 210301_at                                                          |                              | xanthine dehydrogenase                                                                                                                                                                                                                                                                   |
| 214580_x_at                                                        |                              | keratin 6c                                                                                                                                                                                                                                                                               |
| 1561146_at,<br>233864_s_at,<br>217727_x_at                         | 222388_s_at,<br>222387_s_at, | vacuolar protein sorting 35 (yeast)                                                                                                                                                                                                                                                      |
| 214868_at                                                          |                              | piwi-like 1 (drosophila)                                                                                                                                                                                                                                                                 |
| 223232_s_at, 223233_s_at                                           |                              | cingulin                                                                                                                                                                                                                                                                                 |
| 209101_at                                                          |                              | connective tissue growth factor                                                                                                                                                                                                                                                          |
| 213867_x_at                                                        |                              | actin, beta                                                                                                                                                                                                                                                                              |
| 208330_at                                                          |                              | aristaless-like homeobox 4                                                                                                                                                                                                                                                               |
| 225533_at,<br>227211_at                                            | 227212_s_at,                 | phd finger protein 19                                                                                                                                                                                                                                                                    |
| 215390_at,<br>223007_s_at,<br>223008_s_at,<br>237841_at, 227831_at | 223006_s_at,<br>223005_s_at, | chromosome 9 open reading frame 5                                                                                                                                                                                                                                                        |
| 241464_s_at                                                        |                              | ,consensus includes gb:ai973033 /fea=est /db_xref=gi:5769859 /db_xref=est:wr46g03.x1 /clone=image:2490772 /ug=hs.126691 ests,gb:ai973033 /db_xref=gi:5769859 /db_xref=wr46g03.x1 /clone=image:2490772 /fea=est /cnt=5 /tid=hs.126691.1 /tier=consend                                     |

|                                                                                                          |                                                                          |                                                                                                                                                                                                                          |
|----------------------------------------------------------------------------------------------------------|--------------------------------------------------------------------------|--------------------------------------------------------------------------------------------------------------------------------------------------------------------------------------------------------------------------|
|                                                                                                          |                                                                          | /stk=4 /ug=hs.126691 /ug_title=ests                                                                                                                                                                                      |
| 1560763_at,<br>1565680_at,<br>238354_x_at,<br>212504_at                                                  | 1565681_s_at,<br>212503_s_at,<br>238358_x_at,                            | dip2 disco-interacting protein 2 homolog c (drosophila)                                                                                                                                                                  |
| 208485_x_at,<br>211316_x_at,<br>237367_x_at,<br>214486_x_at,<br>211317_s_at,<br>209939_x_at, 209508_x_at | 210563_x_at,<br>239629_at,<br>214618_at,<br>211862_x_at,<br>210564_x_at, | cas8 and fadd-like apoptosis regulator                                                                                                                                                                                   |
| 220500_s_at, 219151_s_at                                                                                 |                                                                          | rab, member of ras oncogene family-like 2b                                                                                                                                                                               |
| 1570121_at, 206448_at                                                                                    |                                                                          | zinc finger protein 365                                                                                                                                                                                                  |
| 206675_s_at,<br>217591_at, 244054_at, 232379_at                                                          | 215889_at,                                                               | ski-like                                                                                                                                                                                                                 |
| 218347_at,<br>239868_at                                                                                  | 240800_x_at,                                                             | radical s-adenosyl methionine and flavodoxin domains 1                                                                                                                                                                   |
| 218557_at                                                                                                |                                                                          | nitrilase family, member 2                                                                                                                                                                                               |
| 1555355_a_at,<br>241435_at                                                                               | 214447_at,                                                               | v-ets erythroblastosis virus e26 oncogene homolog 1 (avian)                                                                                                                                                              |
| 218078_s_at, 236507_at                                                                                   |                                                                          | zinc finger, dhhc-type containing 3                                                                                                                                                                                      |
| 207104_x_at,<br>229937_x_at, 207872_s_at                                                                 | 211336_x_at,                                                             | leukocyte immunoglobulin-like receptor, subfamily b (with tm and itm domains), member 1                                                                                                                                  |
| 223839_s_at                                                                                              |                                                                          | stearoyl-coa desaturase (delta-9-desaturase)                                                                                                                                                                             |
| 218108_at                                                                                                |                                                                          | chromosome 14 open reading frame 130                                                                                                                                                                                     |
| 226908_at                                                                                                |                                                                          | leucine-rich repeats and immunoglobulin-like domains 3                                                                                                                                                                   |
| 1569569_x_at                                                                                             |                                                                          | .gb:bc038707.1 /db_xref=gi:24270817 /tid=hs2.385780.1 /cnt=3 /fea=mrna /tier=consend /stk=0 /ug=hs.385780 /ug_title=homo sapiens, similar to neuronal thread protein, clone image:3932744, mrna /def=homo sapiens, mrna. |
| 1569568_at                                                                                               |                                                                          | .gb:bc038707.1 /db_xref=gi:24270817 /tid=hs2.385780.1 /cnt=3 /fea=mrna /tier=consend /stk=0 /ug=hs.385780 /ug_title=homo sapiens, similar to neuronal thread protein, clone image:3932744, mrna /def=homo sapiens, mrna. |
| 218182_s_at,<br>222549_at                                                                                | 238967_at,                                                               | claudin 1                                                                                                                                                                                                                |
| 202196_s_at,<br>232947_at, 230508_at                                                                     | 214247_s_at,                                                             | dickkopf homolog 3 (xenopus laevis)                                                                                                                                                                                      |
| 203759_at, 215710_at                                                                                     |                                                                          | st3 beta-galactoside alpha-2,3-sialyltransferase 4                                                                                                                                                                       |
| 215410_at                                                                                                |                                                                          | postmeiotic segregation increased 2-like 1                                                                                                                                                                               |
| 222760_at, 230586_s_at                                                                                   |                                                                          | zinc finger protein 703                                                                                                                                                                                                  |

|                                             |                              |                                                                                      |
|---------------------------------------------|------------------------------|--------------------------------------------------------------------------------------|
| 220060_s_at,<br>227928_at                   | 224147_at,                   | chromosome 12 open reading frame 48                                                  |
| 206838_at                                   |                              | t-box 19                                                                             |
| 204969_s_at, 212398_at                      |                              | radixin                                                                              |
| 1553031_at, 237690_at                       |                              | g protein-coupled receptor 115                                                       |
| 1552701_a_at, 1552703_s_at                  |                              | caspase-1 dominant-negative inhibitor pseudo-ice                                     |
| 220602_s_at                                 |                              | hypothetical protein flj90297                                                        |
| 204532_x_at,<br>208596_s_at,<br>215125_s_at | 207126_x_at,<br>221305_s_at, | udp glucuronosyltransferase 1 family, polypeptide a8                                 |
| 206800_at, 239035_at, 226929_at             |                              | 5,10-methylenetetrahydrofolate reductase (nadph)                                     |
| 1552703_s_at                                |                              | caspase 1, apoptosis-related cysteine peptidase (interleukin 1, beta, convertase)    |
| 202123_s_at                                 |                              | v-abl abelson murine leukemia viral oncogene homolog 1                               |
| 207396_s_at                                 |                              | asparagine-linked glycosylation 3 homolog (yeast, alpha-1,3-mannosyltransferase)     |
| 200696_s_at,<br>227957_at, 227958_s_at      | 214040_s_at,                 | gelsolin (amyloidosis, finnish type)                                                 |
| 206683_at                                   |                              | zinc finger protein 165                                                              |
| 227379_at                                   |                              | o-acyltransferase (membrane bound) domain containing 1                               |
| 226217_at,<br>239596_at, 243524_at          | 226601_at,                   | solute carrier family 30 (zinc transporter), member 7                                |
| 207795_s_at,<br>210606_x_at                 | 207796_x_at,                 | killer cell lectin-like receptor subfamily d, member 1                               |
| 1561330_at                                  |                              | desmoglein 4                                                                         |
| 208534_s_at,<br>212707_s_at                 | 212706_at,                   | ras p21 protein activator 4                                                          |
| 218520_at                                   |                              | tank-binding kinase 1                                                                |
| 223153_x_at                                 |                              | chromosome 7 open reading frame 21                                                   |
| 208328_s_at,<br>214684_at                   | 239571_at,                   | mads box transcription enhancer factor 2, polypeptide a (myocyte enhancer factor 2a) |
| 205576_at                                   |                              | serpin peptidase inhibitor, clade d (heparin cofactor), member 1                     |
| 1561306_s_at, 240048_at                     |                              | stereocilin                                                                          |
| 203363_s_at,<br>203364_s_at                 | 209021_x_at,                 | kiaa0652                                                                             |
| 224950_at                                   |                              | prostaglandin f2 receptor negative regulator                                         |
| 1562761_at, 219147_s_at                     |                              | chromosome 9 open reading frame 95                                                   |
| 155502_at                                   |                              | novel prostate-specific antigen                                                      |
| 223042_s_at                                 |                              | fun14 domain containing 2                                                            |
| 205717_x_at,<br>211066_x_at,                |                              | protocadherin gamma subfamily b, 6                                                   |

|                                                                                                                              |                                                                                                                                                                                     |
|------------------------------------------------------------------------------------------------------------------------------|-------------------------------------------------------------------------------------------------------------------------------------------------------------------------------------|
| 215836_s_at, 209079_x_at                                                                                                     |                                                                                                                                                                                     |
| 227599_at                                                                                                                    | chromosome 3 open reading frame 59                                                                                                                                                  |
| 204538_x_at                                                                                                                  | hypothetical protein loc339047                                                                                                                                                      |
| 220157_x_at                                                                                                                  | pleckstrin homology domain containing, family a (phosphoinositide binding specific) member 8                                                                                        |
| 1566623_at, 1569054_at, 202800_at, 1566624_at                                                                                | solute carrier family 1 (glial high affinity glutamate transporter), member 3                                                                                                       |
| 229570_at                                                                                                                    | laminin, alpha 5                                                                                                                                                                    |
| 218796_at, 60474_at, 232479_at, 229545_at                                                                                    | chromosome 20 open reading frame 42                                                                                                                                                 |
| 1558969_a_at, 226877_at, 235314_at                                                                                           | hypothetical protein loc132241                                                                                                                                                      |
| 211840_s_at, 210837_s_at, 210836_x_at, 1554717_a_at, 1556331_a_at, 1556763_at, 204491_at, 1556764_s_at, 243586_at, 236610_at | phosphodiesterase 4d, camp-specific (phosphodiesterase e3 dunce homolog, drosophila)                                                                                                |
| 203258_at                                                                                                                    | dr1-associated protein 1 (negative cofactor 2 alpha)                                                                                                                                |
| 206569_at                                                                                                                    | interleukin 24                                                                                                                                                                      |
| 220289_s_at, 220290_at                                                                                                       | absent in melanoma 1-like                                                                                                                                                           |
| 1569504_at                                                                                                                   | .gb:bc032342.1 /db_xref=gi:22749617 /tid=hs.171083.1 /cnt=4 /fea=mrna /tier=consend /stk=0 /ug=hs.171083 /ug_title=homo sapiens, clone image:5206716, mrna /def=homo sapiens, mrna. |
| 227811_at                                                                                                                    | fyve, rhogef and ph domain containing 3                                                                                                                                             |
| 225612_s_at                                                                                                                  | udp-glcnaac:betagal beta-1,3-n-acetylglucosaminyltransferase 5                                                                                                                      |
| 1559125_at, 218300_at                                                                                                        | chromosome 16 open reading frame 53                                                                                                                                                 |
| 205403_at                                                                                                                    | interleukin 1 receptor, type ii                                                                                                                                                     |
| 208198_x_at, 217296_at                                                                                                       | killer cell immunoglobulin-like receptor, two domains, short cytoplasmic tail, 1                                                                                                    |
| 219682_s_at, 229565_x_at, 243234_at, 229576_s_at, 228344_s_at, 222917_s_at, 225544_at                                        | t-box 3 (ulnar mammary syndrome)                                                                                                                                                    |
| 241644_at                                                                                                                    | bola-like 2 (e. coli)                                                                                                                                                               |
| 202239_at                                                                                                                    | poly (adp-ribose) polymerase family, member 4                                                                                                                                       |
| 215694_at, 218933_at, 222163_s_at                                                                                            | spermatogenesis associated 5-like 1                                                                                                                                                 |
| 224826_at, 230492_s_at                                                                                                       | hypothetical protein kiaa1434                                                                                                                                                       |
| 229817_at, 232303_at, 241461_at                                                                                              | dkfzp434m098 protein                                                                                                                                                                |
| 200976_s_at, 200977_s_at, 213786_at                                                                                          | tax1 (human t-cell leukemia virus type i) binding protein 1                                                                                                                         |

|                                                                                 |                                                                                                                                                                                                                                                                                           |
|---------------------------------------------------------------------------------|-------------------------------------------------------------------------------------------------------------------------------------------------------------------------------------------------------------------------------------------------------------------------------------------|
| 202228_s_at, 242865_at                                                          | neuroplastin                                                                                                                                                                                                                                                                              |
| 1557031_at, 236454_at                                                           | hypothetical protein loc285498                                                                                                                                                                                                                                                            |
| 241950_at                                                                       | ,consensus includes gb:bg034847 /fea=est /db_xref=gi:12428532 /db_xref=est:602325304f1 /clone=image:4413361 /ug=hs.71994 ests,gb:bg034847 /db_xref=gi:12428532 /db_xref=602325304f1 /clone=image:4413361 /fea=est /cnt=5 /tid=hs.71994.0 /tier=consend /stk=0 /ug=hs.71994 /ug_title=ests |
| 209369_at                                                                       | annexin a3                                                                                                                                                                                                                                                                                |
| 205516_x_at, 241524_at,<br>211358_s_at, 213977_s_at,<br>213976_at               | cdkn1a interacting zinc finger protein 1                                                                                                                                                                                                                                                  |
| 200595_s_at, 200596_s_at                                                        | eukaryotic translation initiation factor 3, subunit 10 theta, 150/170kda                                                                                                                                                                                                                  |
| 219691_at, 228531_at                                                            | sterile alpha motif domain containing 9                                                                                                                                                                                                                                                   |
| 229890_at, 231739_at                                                            | proline-rich transmembrane protein 1                                                                                                                                                                                                                                                      |
| 208499_s_at, 233351_at                                                          | dnaj (hsp40) homolog, subfamily c, member 3                                                                                                                                                                                                                                               |
| 229125_at                                                                       | ankyrin repeat domain 38                                                                                                                                                                                                                                                                  |
| 211936_at, 230031_at                                                            | heat shock 70kda protein 5 (glucose-regulated protein, 78kda)                                                                                                                                                                                                                             |
| 203696_s_at                                                                     | replication factor c (activator 1) 2, 40kda                                                                                                                                                                                                                                               |
| 203779_s_at, 230518_at,<br>203780_at                                            | epithelial v-like antigen 1                                                                                                                                                                                                                                                               |
| 203191_at, 203192_at                                                            | atp-binding cassette, sub-family b (mdr/tap), member 6                                                                                                                                                                                                                                    |
| 221704_s_at, 236889_at,<br>232354_at                                            | vacuolar protein sorting 37b (yeast)                                                                                                                                                                                                                                                      |
| 209877_at                                                                       | synuclein, gamma (breast cancer-specific protein 1)                                                                                                                                                                                                                                       |
| 228798_x_at, 207824_s_at,<br>212064_x_at, 229807_s_at                           | myc-associated zinc finger protein (purine-binding transcription factor)                                                                                                                                                                                                                  |
| 1562749_at                                                                      | hypothetical protein loc650793                                                                                                                                                                                                                                                            |
| 1557918_s_at, 202235_at,<br>209900_s_at, 202236_s_at,<br>202234_s_at            | solute carrier family 16 (monocarboxylic acid transporters), member 1                                                                                                                                                                                                                     |
| 223538_at, 223539_s_at                                                          | small edrk-rich factor 1a (telomeric)                                                                                                                                                                                                                                                     |
| 200929_at, 212352_s_at,<br>239851_at, 238886_at                                 | transmembrane emp24-like trafficking protein 10 (yeast)                                                                                                                                                                                                                                   |
| 200001_at                                                                       | calpain, small subunit 1                                                                                                                                                                                                                                                                  |
| 1554346_at, 211871_x_at,<br>207124_s_at, 1560094_at,<br>204000_at, 1560095_s_at | guanine nucleotide binding protein (g protein), beta 5                                                                                                                                                                                                                                    |
| 220191_at                                                                       | gastrokine 1                                                                                                                                                                                                                                                                              |
| 1553045_at, 230643_at                                                           | wingless-type mmtv integration site family, member 9a                                                                                                                                                                                                                                     |
| 227475_at                                                                       | forkhead box q1                                                                                                                                                                                                                                                                           |
| 219697_at                                                                       | heparan sulfate (glucosamine) 3-o-sulfotransferase 2                                                                                                                                                                                                                                      |

|                                                             |                                                                                                                                                                                                                                                                                                   |
|-------------------------------------------------------------|---------------------------------------------------------------------------------------------------------------------------------------------------------------------------------------------------------------------------------------------------------------------------------------------------|
| 1563802_at                                                  | hypothetical protein loc284551                                                                                                                                                                                                                                                                    |
| 215083_at,<br>222612_at,<br>226574_at,<br>226724_s_at       | 222611_s_at,<br>218371_s_at,<br>243997_x_at,<br>paraspeckle component 1                                                                                                                                                                                                                           |
| 1553749_at,<br>1553750_a_at, 232048_at                      | 226753_at,<br>family with sequence similarity 76, member b                                                                                                                                                                                                                                        |
| 216149_at                                                   | hypothetical protein dkfzp667m2411                                                                                                                                                                                                                                                                |
| 229539_at                                                   | ,consensus includes gb:aw665395 /fea=est /db_xref=gi:7457941<br>/db_xref=est:hi90c02.x1 /clone=image:2979554 /ug=hs.58185<br>ests,gb:aw665395 /db_xref=gi:7457941 /db_xref=hi90c02.x1<br>/clone=image:2979554 /fea=est /cnt=20 /tid=hs.58185.0 /tier=stack<br>/stk=15 /ug=hs.58185 /ug_title=ests |
| 206458_s_at, 206459_s_at                                    | wingless-type mmtv integration site family, member 2b                                                                                                                                                                                                                                             |
| 204532_x_at,<br>215125_s_at,<br>232654_s_at,<br>206094_x_at | 207126_x_at,<br>232655_at,<br>208596_s_at,<br>udp glucuronosyltransferase 1 family, polypeptide a6                                                                                                                                                                                                |
| 226738_at                                                   | wd repeat domain 81                                                                                                                                                                                                                                                                               |
| 1556753_s_at, 206858_s_at                                   | homeobox c6                                                                                                                                                                                                                                                                                       |
| 201268_at                                                   | non-metastatic cells 2, protein (nm23b) expressed in                                                                                                                                                                                                                                              |
| 212509_s_at                                                 | flj46603 protein                                                                                                                                                                                                                                                                                  |
| 206753_at                                                   | retinol dehydrogenase 16 (all-trans and 13-cis)                                                                                                                                                                                                                                                   |
| 223367_at, 239018_at, 239194_at                             | williams beuren syndrome chromosome region 18                                                                                                                                                                                                                                                     |
| 225135_at, 238189_at                                        | sin3 homolog a, transcription regulator (yeast)                                                                                                                                                                                                                                                   |
| 227598_at                                                   | chromosome 7 open reading frame 29                                                                                                                                                                                                                                                                |
| 229615_at                                                   | ,consensus includes gb:av722510 /fea=est /db_xref=gi:10825071<br>/db_xref=est:av722510 /clone=htbagb11 /ug=hs.5461<br>ests,gb:av722510 /db_xref=gi:10825071 /db_xref=av722510<br>/clone=htbagb11 /fea=est /cnt=18 /tid=hs.5461.0 /tier=stack /stk=12<br>/ug=hs.5461 /ug_title=ests                |
| 1557147_a_at, 218245_at                                     | leucine rich repeat containing 54                                                                                                                                                                                                                                                                 |
| 201921_at, 226859_at                                        | guanine nucleotide binding protein (g protein), gamma 10                                                                                                                                                                                                                                          |
| 208962_s_at,<br>208963_x_at                                 | 208964_s_at,<br>fatty acid desaturase 1                                                                                                                                                                                                                                                           |
| 223058_at,<br>229695_at,<br>244423_at, 237747_at            | 223059_s_at,<br>241548_at,<br>family with sequence similarity 107, member b                                                                                                                                                                                                                       |
| 236646_at                                                   | chromosome 12 open reading frame 59                                                                                                                                                                                                                                                               |
| 222290_at                                                   | olfactory receptor, family 2, subfamily a, member 20 pseudogene                                                                                                                                                                                                                                   |
| 227663_at                                                   | similar to cadherin 12, type 2 preproprotein; br-cadherin; cadherin-12;                                                                                                                                                                                                                           |

|                                                                 |                                                                                                             |
|-----------------------------------------------------------------|-------------------------------------------------------------------------------------------------------------|
|                                                                 | n-cadherin 2; brain-cadherin; neuronal cadherin 2; cadherin, neural type, 2                                 |
| 222228_s_at                                                     | alkb, alkylation repair homolog 4 (e. coli)                                                                 |
| 1559309_at,<br>212246_at                                        | 212245_at, multiple coagulation factor deficiency 2                                                         |
| 225789_at,<br>240496_at, 231299_at                              | 239026_x_at, centaurin, gamma 3                                                                             |
| 201886_at, 216389_s_at                                          | wd repeat domain 23                                                                                         |
| 217848_s_at                                                     | pyrophosphatase (inorganic) 1                                                                               |
| 201294_s_at,<br>210561_s_at,<br>213406_at, 201296_s_at          | 201295_s_at, 227501_at, wd repeat and socs box-containing 1                                                 |
| 201688_s_at,<br>201689_s_at,<br>236655_at, 239862_at, 228818_at | 201690_s_at, 201691_s_at, tumor protein d52                                                                 |
| 1565668_at,<br>1565669_at, 209251_x_at                          | 211750_x_at, tubulin, alpha, ubiquitous                                                                     |
| 208072_s_at                                                     | diacylglycerol kinase, delta 130kda                                                                         |
| 205717_x_at,<br>209079_x_at, 215836_s_at                        | 211066_x_at, protocadherin gamma subfamily a, 2                                                             |
| 1562803_at, 1569839_s_at                                        | chromosome 9 open reading frame 29                                                                          |
| 208924_at                                                       | ring finger protein 11                                                                                      |
| 220321_s_at                                                     | hypothetical protein flj13646                                                                               |
| 203429_s_at                                                     | chromosome 1 open reading frame 9                                                                           |
| 1555175_a_at, 219543_at                                         | mawd binding protein                                                                                        |
| 1552721_a_at                                                    | fibroblast growth factor 1 (acidic)                                                                         |
| 1559208_at                                                      | st7 overlapping transcript 4 (non-coding rna)                                                               |
| 200593_s_at,<br>236244_at,<br>235603_at,<br>200594_x_at         | 225805_at, 236723_at, 221639_x_at, heterogeneous nuclear ribonucleoprotein u (scaffold attachment factor a) |
| 208636_at,<br>237401_at, 208637_x_at                            | 211160_x_at, actinin, alpha 1                                                                               |
| 217104_at                                                       | similar to cervical cancer suppressor-1                                                                     |
| 207650_x_at,<br>231201_at                                       | 214391_x_at, prostaglandin e receptor 1 (subtype ep1), 42kda                                                |
| 202986_at                                                       | aryl-hydrocarbon receptor nuclear translocator 2                                                            |
| 203300_x_at,<br>243745_at, 230264_s_at                          | 228415_at, adaptor-related protein complex 1, sigma 2 subunit                                               |
| 214522_x_at                                                     | histone 1, h2ad                                                                                             |
| 1553101_a_at, 228034_x_at                                       | alkb, alkylation repair homolog 5 (e. coli)                                                                 |

|                                                                       |                                                                                                                                                                                                                                                                                          |
|-----------------------------------------------------------------------|------------------------------------------------------------------------------------------------------------------------------------------------------------------------------------------------------------------------------------------------------------------------------------------|
| 234302_s_at                                                           |                                                                                                                                                                                                                                                                                          |
| 1555306_a_at, 206728_at                                               | endothelin converting enzyme 2                                                                                                                                                                                                                                                           |
| 1556924_at                                                            | amyotrophic lateral sclerosis 2 (juvenile) chromosome region, candidate 10                                                                                                                                                                                                               |
| 204618_s_at, 206173_x_at, 236164_at, 226900_at                        | ga binding protein transcription factor, beta subunit 1, 53kda                                                                                                                                                                                                                           |
| 204361_s_at, 225639_at, 242598_at, 204362_at                          | src family associated phosphoprotein 2                                                                                                                                                                                                                                                   |
| 220936_s_at, 225245_x_at, 228213_at, 224301_x_at                      | h2a histone family, member j                                                                                                                                                                                                                                                             |
| 220240_s_at, 220241_at, 230317_x_at                                   | transmembrane and coiled-coil domains 3                                                                                                                                                                                                                                                  |
| 223109_at                                                             | trub pseudouridine (psi) synthase homolog 2 (e. coli)                                                                                                                                                                                                                                    |
| 1556773_at, 211756_at, 206300_s_at, 210355_at                         | parathyroid hormone-like hormone                                                                                                                                                                                                                                                         |
| 209684_at, 238743_at                                                  | ras and rab interactor 2                                                                                                                                                                                                                                                                 |
| 228008_at                                                             | ,consensus includes gb:ai972511 /fea=est /db_xref=gi:5769257 /db_xref=est:wr38d11.x1 /clone=image:2489973 /ug=hs.144583 ests,gb:ai972511 /db_xref=gi:5769257 /db_xref=wr38d11.x1 /clone=image:2489973 /fea=est /cnt=27 /tid=hs.144583.0 /tier=stack /stk=12 /ug=hs.144583 /ug_title=ests |
| 239024_at, 238711_s_at, 235166_at, 1559707_at, 228545_at, 230821_at   | zinc finger protein 148 (phz-52)                                                                                                                                                                                                                                                         |
| 1552295_a_at, 225277_at                                               | solute carrier family 39 (zinc transporter), member 13                                                                                                                                                                                                                                   |
| 221581_s_at                                                           | linker for activation of t cells family, member 2                                                                                                                                                                                                                                        |
| 208264_s_at, 208985_s_at                                              | eukaryotic translation initiation factor 3, subunit 1 alpha, 35kda                                                                                                                                                                                                                       |
| 204532_x_at, 215125_s_at, 208596_s_at, 207126_x_at                    | udp glucuronosyltransferase 1 family, polypeptide a1                                                                                                                                                                                                                                     |
| 202887_s_at                                                           | dna-damage-inducible transcript 4                                                                                                                                                                                                                                                        |
| 1555645_at, 224992_s_at, 224991_at, 231643_s_at, 243720_at, 238086_at | c-maf-inducing protein                                                                                                                                                                                                                                                                   |
| 205138_s_at, 205139_s_at, 1557742_a_at, 1557741_at                    | uronyl-2-sulfotransferase                                                                                                                                                                                                                                                                |
| 207388_s_at, 210367_s_at                                              | prostaglandin e synthase                                                                                                                                                                                                                                                                 |
| 234343_s_at, 1557432_at, 219026_s_at, 222810_s_at, 234910_at          | ras protein activator like 2                                                                                                                                                                                                                                                             |
| 214577_at, 226084_at                                                  | microtubule-associated protein 1b                                                                                                                                                                                                                                                        |
| 200614_at, 239871_at, 210498_at                                       | clathrin, heavy polypeptide (hc)                                                                                                                                                                                                                                                         |



|                                                                                             |                                                                                                                                                                                                                                                           |
|---------------------------------------------------------------------------------------------|-----------------------------------------------------------------------------------------------------------------------------------------------------------------------------------------------------------------------------------------------------------|
| 201021_s_at, 201022_s_at                                                                    | destrin (actin depolymerizing factor)                                                                                                                                                                                                                     |
| 1557698_at, 229804_x_at, 1557699_x_at                                                       | cobw domain containing 1                                                                                                                                                                                                                                  |
| 210746_s_at, 240274_at                                                                      | erythrocyte membrane protein band 4.2                                                                                                                                                                                                                     |
| 203788_s_at, 203789_s_at                                                                    | sema domain, immunoglobulin domain (ig), short basic domain, secreted, (semaphorin) 3c                                                                                                                                                                    |
| 220106_at, 224305_s_at, 224306_at                                                           | npc1 (niemann-pick disease, type c1, gene)-like 1                                                                                                                                                                                                         |
| 1553025_at                                                                                  | g protein-coupled receptor 126                                                                                                                                                                                                                            |
| 1564165_at, 1564166_s_at, 222615_s_at, 218378_s_at                                          | prkr interacting protein 1 (il11 inducible)                                                                                                                                                                                                               |
| 203627_at, 237377_at, 238544_at, 237881_at, 236934_at                                       | insulin-like growth factor 1 receptor                                                                                                                                                                                                                     |
| 1557350_at, 201514_s_at, 201503_at                                                          | ras-gtpase-activating protein sh3-domain-binding protein                                                                                                                                                                                                  |
| 204275_at, 230295_at                                                                        | small optic lobes homolog (drosophila)                                                                                                                                                                                                                    |
| 1561868_at                                                                                  | .gb:al359058.1 /db_xref=gi:8518184 /tid=hs2.72367.1 /cnt=6 /fea=mrna /tier=consend /stk=0 /ug=hs.72367 /ug_title=homo sapiens mrna full length insert cdna clone euroimage 592473. /def=homo sapiens mrna full length insert cdna clone euroimage 592473. |
| 221371_at                                                                                   | tumor necrosis factor (ligand) superfamily, member 18                                                                                                                                                                                                     |
| 1561863_a_at                                                                                | .gb:h53780 /db_xref=gi:993927 /db_xref=yq85g03.r1 /clone=image:202612 /tid=hs2.36823.1 /cnt=5 /fea=mrna /tier=consend /stk=0 /ug=hs.36823 /ug_title=homo sapiens full length insert cdna yq85g03                                                          |
| 221191_at, 235263_at, 243960_x_at, 223724_s_at                                              | dkfzp434a0131 protein                                                                                                                                                                                                                                     |
| 211665_s_at, 217576_x_at, 217575_s_at, 217644_s_at, 238830_at, 233369_at                    | son of sevenless homolog 2 (drosophila)                                                                                                                                                                                                                   |
| 204036_at, 204037_at, 232716_at, 241773_at, 204038_s_at                                     | endothelial differentiation, lysophosphatidic acid g-protein-coupled receptor, 2                                                                                                                                                                          |
| 212668_at, 215589_at, 236370_at, 237723_at, 212666_at, 1559426_at, 232665_x_at, 215458_s_at | smad specific e3 ubiquitin protein ligase 1                                                                                                                                                                                                               |
| 1554382_at                                                                                  | hypothetical protein loc200261                                                                                                                                                                                                                            |
| 235340_at, 235714_at, 236077_at                                                             | glucosidase, alpha; neutral c                                                                                                                                                                                                                             |
| 225020_at, 235966_at, 228942_s_at                                                           | ngap-like protein                                                                                                                                                                                                                                         |

|                                                                               |                                                                                                                                                                                                                   |
|-------------------------------------------------------------------------------|-------------------------------------------------------------------------------------------------------------------------------------------------------------------------------------------------------------------|
| 202912_at                                                                     | adrenomedullin                                                                                                                                                                                                    |
| 202021_x_at, 212130_x_at,<br>212227_x_at, 212225_at,<br>211956_s_at           | eukaryotic translation initiation factor 1                                                                                                                                                                        |
| 1569573_at, 219366_at                                                         | apoptosis, caspase activation inhibitor                                                                                                                                                                           |
| 202154_x_at, 213476_x_at                                                      | melanocortin 1 receptor (alpha melanocyte stimulating hormone receptor)                                                                                                                                           |
| 200075_s_at, 213621_s_at                                                      | guanylate kinase 1                                                                                                                                                                                                |
| 1561705_at                                                                    | .gb:bc037861.1 /db_xref=gi:23138659 /tid=hs.2.425116.2 /cnt=1 /fea=mrna /tier=consend /stk=1 /ug=hs.425116 /ug_title=homo sapiens cDNA fj23901 fis, clone lng15812. /def=homo sapiens, clone image:5272626, mrna. |
| 220521_s_at, 232612_s_at                                                      | atg16 autophagy related 16-like 1 (s. cerevisiae)                                                                                                                                                                 |
| 202899_s_at, 208673_s_at,<br>232392_at, 208672_s_at,<br>235324_at, 237485_at  | splicing factor, arginine/serine-rich 3                                                                                                                                                                           |
| 201605_x_at                                                                   | calponin 2                                                                                                                                                                                                        |
| 1560105_at, 205846_at,<br>230250_at                                           | protein tyrosine phosphatase, receptor type, b                                                                                                                                                                    |
| 230469_at, 242047_at                                                          | pleckstrin homology domain containing, family k member 1                                                                                                                                                          |
| 205027_s_at, 235421_at                                                        | mitogen-activated protein kinase kinase kinase 8                                                                                                                                                                  |
| 210676_x_at                                                                   | ranbp2-like and grip domain containing 8                                                                                                                                                                          |
| 225650_at, 228276_at                                                          | sterile alpha motif domain containing 1                                                                                                                                                                           |
| 200844_s_at, 200845_s_at                                                      | peroxiredoxin 6                                                                                                                                                                                                   |
| 213982_s_at, 237650_at                                                        | rab gtpase activating protein 1-like                                                                                                                                                                              |
| 1559808_at, 201373_at                                                         | plectin 1, intermediate filament binding protein 500kda                                                                                                                                                           |
| 219151_s_at, 220500_s_at                                                      | rab, member of ras oncogene family-like 2a                                                                                                                                                                        |
| 209929_s_at, 36004_at                                                         | inhibitor of kappa light polypeptide gene enhancer in b-cells, kinase gamma                                                                                                                                       |
| 205623_at                                                                     | aldehyde dehydrogenase 3 family, member 1                                                                                                                                                                         |
| 222206_s_at                                                                   | nicalin homolog (zebrafish)                                                                                                                                                                                       |
| 1569245_at, 1569246_a_at                                                      | similar to riken cDNA 4930578i06                                                                                                                                                                                  |
| 200847_s_at, 242904_x_at,<br>231258_at                                        | transmembrane protein 66                                                                                                                                                                                          |
| 1563509_at, 211794_at,<br>205285_s_at, 211795_s_at,<br>227266_s_at, 224148_at | fyn binding protein (fyn-120/130)                                                                                                                                                                                 |
| 221064_s_at                                                                   | chromosome 16 open reading frame 28                                                                                                                                                                               |
| 219850_s_at, 241397_at,<br>232361_s_at, 232360_at,<br>222932_at, 225645_at,   | ets homologous factor                                                                                                                                                                                             |

|                                                                                         |                                                        |                                                                                         |
|-----------------------------------------------------------------------------------------|--------------------------------------------------------|-----------------------------------------------------------------------------------------|
| 224189_x_at                                                                             |                                                        |                                                                                         |
| 233180_at,<br>1553721_at                                                                | 1553722_s_at,                                          | ring finger protein 152                                                                 |
| 213810_s_at,<br>223143_s_at,<br>223144_s_at                                             | 227368_at,<br>223145_s_at,                             | chromosome 6 open reading frame 166                                                     |
| 1554415_at, 213654_at                                                                   |                                                        | taf5-like rna polymerase ii, p300/cbp-associated factor (pcaf)-associated factor, 65kda |
| 209306_s_at,<br>210369_at                                                               | 209307_at,                                             | swap-70 protein                                                                         |
| 225496_s_at, 232914_s_at                                                                |                                                        | synaptotagmin-like 2                                                                    |
| 1556538_at,<br>239521_at,<br>242087_x_at, 223723_at                                     | 220043_s_at,<br>243629_x_at,                           | antigen p97 (melanoma associated) identified by monoclonal antibodies 133.2 and 96.5    |
| 204204_at, 231099_at                                                                    |                                                        | solute carrier family 31 (copper transporters), member 2                                |
| 227269_s_at,<br>213466_at,<br>227698_s_at                                               | 1569396_at,<br>242449_at,                              | rab40c, member ras oncogene family                                                      |
| 225655_at                                                                               |                                                        | ubiquitin-like, containing phd and ring finger domains, 1                               |
| 219382_at                                                                               |                                                        | serta domain containing 3                                                               |
| 207574_s_at,<br>213560_at, 209304_x_at                                                  | 209305_s_at,                                           | growth arrest and dna-damage-inducible, beta                                            |
| 1561666_a_at                                                                            |                                                        | kiaa1908 protein                                                                        |
| 212093_s_at,<br>212095_s_at,<br>212096_s_at                                             | 240466_at,<br>239576_at,                               | mitochondrial tumor suppressor 1                                                        |
| 203091_at,<br>214094_at, 212847_at, 240307_at                                           | 214093_s_at,                                           | far upstream element (fuse) binding protein 1                                           |
| 221057_at                                                                               |                                                        | spermatogenesis associated 1                                                            |
| 1565653_at,<br>232743_at,<br>232723_at, 232498_at                                       | 241361_at,<br>230361_at,                               | kiaa1833 protein                                                                        |
| 205550_s_at,<br>240994_at,<br>1568768_s_at,<br>1562111_at,<br>1556817_a_at, 212645_x_at | 236628_at,<br>238749_at,<br>1562260_at,<br>1561370_at, | brain and reproductive organ-expressed (tnfrsf1a modulator)                             |
| 202752_x_at,<br>216603_at,<br>216604_s_at                                               | 216092_s_at,<br>217248_s_at,                           | solute carrier family 7 (cationic amino acid transporter, y+ system), member 8          |
| 204473_s_at,                                                                            | 243307_at,                                             | zinc finger protein 592                                                                 |

|                                                                                                          |                                                                                                                                                                                                                                                                                |
|----------------------------------------------------------------------------------------------------------|--------------------------------------------------------------------------------------------------------------------------------------------------------------------------------------------------------------------------------------------------------------------------------|
| 244458_at, 213389_at                                                                                     |                                                                                                                                                                                                                                                                                |
| 200916_at, 210978_s_at                                                                                   | transgelin 2                                                                                                                                                                                                                                                                   |
| 208891_at, 208892_s_at, 208893_s_at                                                                      | dual specificity phosphatase 6                                                                                                                                                                                                                                                 |
| 202186_x_at, 202187_s_at                                                                                 | protein phosphatase 2, regulatory subunit b (b56), alpha isoform                                                                                                                                                                                                               |
| 231936_at                                                                                                | homeobox c9                                                                                                                                                                                                                                                                    |
| 1565832_at, 1565833_at, 213005_s_at, 216763_at, 238789_at, 242936_at, 237162_at, 216762_at, 1565834_a_at | ankyrin repeat domain 15                                                                                                                                                                                                                                                       |
| 1562453_at                                                                                               | ,gb:al833164.1 /db_xref=gi:21733789 /tid=hs.376897.1 /cnt=2 /fea=mrna /tier=consend /stk=0 /ug=hs.376897 /ug_title=homo sapiens mrna; cdna dkfzp686f1318 (from clone dkfzp686f1318) /def=homo sapiens mrna; cdna dkfzp686f1318 (from clone dkfzp686f1318).                     |
| 1558569_at, 1570299_at, 232333_at, 234645_at, 235457_at, 244414_at, 242405_at, 235106_at, 234205_at      | mastermind-like 2 (drosophila)                                                                                                                                                                                                                                                 |
| 206126_at, 216734_s_at, 243798_at                                                                        | burkitt lymphoma receptor 1, gtp binding protein (chemokine (c-x-c motif) receptor 5)                                                                                                                                                                                          |
| 205607_s_at, 41329_at                                                                                    | scy1-like 3 (s. cerevisiae)                                                                                                                                                                                                                                                    |
| 1561631_at, 232961_at, 222154_s_at, 244597_at                                                            | dna polymerase-transactivated protein 6                                                                                                                                                                                                                                        |
| 211170_s_at, 237492_at, 211171_s_at                                                                      | phosphodiesterase 10a                                                                                                                                                                                                                                                          |
| 225948_at, 232814_x_at                                                                                   | chromosome 14 open reading frame 153                                                                                                                                                                                                                                           |
| 235809_at                                                                                                | hypothetical protein dkfzp686l1814                                                                                                                                                                                                                                             |
| 214722_at, 227067_x_at                                                                                   | notch homolog 2 (drosophila) n-terminal like                                                                                                                                                                                                                                   |
| 205220_at                                                                                                | g protein-coupled receptor 109b                                                                                                                                                                                                                                                |
| 218964_at                                                                                                | at rich interactive domain 3b (bright- like)                                                                                                                                                                                                                                   |
| 222302_at                                                                                                | ,consensus includes gb:be813017 /fea=est /db_xref=gi:10245251 /db_xref=est:rc2-an0062-140800-017-g03 /ug=hs.124629 ests,gb:be813017 /db_xref=gi:10245251 /db_xref=rc2-an0062-140800-017-g03 /fea=est /cnt=8 /tid=hs.124629.0 /tier=consend /stk=0 /ug=hs.124629 /ug_title=ests |
| 219427_at                                                                                                | fat tumor suppressor homolog 4 (drosophila)                                                                                                                                                                                                                                    |
| 1558720_at, 212878_s_at, 216187_x_at, 239793_at, 232036_at, 213656_s_at,                                 | kinesin 2                                                                                                                                                                                                                                                                      |

|                                                                        |                                                                                                                                                                                                                                                             |
|------------------------------------------------------------------------|-------------------------------------------------------------------------------------------------------------------------------------------------------------------------------------------------------------------------------------------------------------|
| 212877_at                                                              |                                                                                                                                                                                                                                                             |
| 204028_s_at, 213313_at, 244228_at, 215070_x_at                         | rab gtpase activating protein 1                                                                                                                                                                                                                             |
| 202796_at, 235914_at, 235128_at                                        | synaptopodin                                                                                                                                                                                                                                                |
| 1557070_at, 204654_s_at, 243603_at, 210669_at, 204653_at, 1560503_a_at | transcription factor ap-2 alpha (activating enhancer binding protein 2 alpha)                                                                                                                                                                               |
| 207520_at, 212852_s_at, 210438_x_at, 213027_at                         | trove domain family, member 2                                                                                                                                                                                                                               |
| 218979_at                                                              | chromosome 9 open reading frame 76                                                                                                                                                                                                                          |
| 1569909_at                                                             | keratin 6l                                                                                                                                                                                                                                                  |
| 219179_at                                                              | dapper, antagonist of beta-catenin, homolog 1 (xenopus laevis)                                                                                                                                                                                              |
| 1563010_at, 205816_at, 226189_at, 242982_x_at, 211488_s_at             | integrin, beta 8                                                                                                                                                                                                                                            |
| 213010_at                                                              | protein kinase c, delta binding protein                                                                                                                                                                                                                     |
| 1556227_at, 219810_at, 234988_at, 1556228_a_at                         | valosin containing protein (p97)/p47 complex interacting protein 1                                                                                                                                                                                          |
| 1562274_at                                                             | .gb:al833113.1 /db_xref=gi:21733705 /tid=hs2.407123.1 /cnt=2 /fea=mrna /tier=consend /stk=0 /ug=hs.407123 /ug_title=homo sapiens mrna; cdna dkfzp313i0929 (from clone dkfzp313i0929) /def=homo sapiens mrna; cdna dkfzp313i0929 (from clone dkfzp313i0929). |
| 219474_at                                                              | chromosome 3 open reading frame 52                                                                                                                                                                                                                          |
| 204543_at, 226389_s_at, 225738_at, 244408_at                           | rap guanine nucleotide exchange factor (gef) 1                                                                                                                                                                                                              |
| 1568820_a_at, 231175_at                                                | chromosome 6 open reading frame 65                                                                                                                                                                                                                          |
| 217982_s_at, 224561_s_at                                               | mortality factor 4 like 1                                                                                                                                                                                                                                   |
| 1569392_at, 231556_at                                                  | glycoprotein, synaptic 2                                                                                                                                                                                                                                    |
| 207935_s_at                                                            | keratin 13                                                                                                                                                                                                                                                  |
| 209126_x_at, 213680_at, 214580_x_at                                    | keratin 6b                                                                                                                                                                                                                                                  |
| 1562201_x_at                                                           | .gb:af086001.1 /db_xref=gi:3483346 /tid=hs2.384636.1 /cnt=3 /fea=mrna /tier=consend /stk=0 /ug=hs.384636 /ug_title=homo sapiens full length insert cdna clone yu62c03 /def=homo sapiens full length insert cdna clone yu62c03.                              |
| 208474_at, 237810_at                                                   | claudin 6                                                                                                                                                                                                                                                   |
| 210477_x_at, 210671_x_at, 226048_at, 226046_at                         | mitogen-activated protein kinase 8                                                                                                                                                                                                                          |
| 201169_s_at, 201170_s_at                                               | basic helix-loop-helix domain containing, class b, 2                                                                                                                                                                                                        |
| 205319_at                                                              | prostate stem cell antigen                                                                                                                                                                                                                                  |

|                                                                                                    |                                                                                         |                                                                                                                     |
|----------------------------------------------------------------------------------------------------|-----------------------------------------------------------------------------------------|---------------------------------------------------------------------------------------------------------------------|
| 240329_at,<br>200731_s_at,<br>200730_s_at                                                          | 200733_s_at,<br>1559322_at,                                                             | protein tyrosine phosphatase type iva, member 1                                                                     |
| 220468_at                                                                                          |                                                                                         | adp-ribosylation factor-like 14                                                                                     |
| 1563498_s_at, 236436_at                                                                            |                                                                                         | hypothetical protein loc283130                                                                                      |
| 203711_s_at, 213374_x_at                                                                           |                                                                                         | 3-hydroxyisobutyryl-coenzyme a hydrolase                                                                            |
| 212921_at,<br>212922_s_at                                                                          | 233713_at,                                                                              | set and mynd domain containing 2                                                                                    |
| 211255_x_at, 215158_s_at                                                                           |                                                                                         | death effector domain containing                                                                                    |
| 1557543_at,<br>210756_s_at,<br>212377_s_at                                                         | 202445_s_at,<br>202443_x_at,                                                            | notch homolog 2 (drosophila)                                                                                        |
| 1564435_a_at                                                                                       |                                                                                         | keratin protein k6irs                                                                                               |
| 212185_x_at                                                                                        |                                                                                         | metallothionein 2a                                                                                                  |
| 1557100_s_at,<br>242349_at,<br>224481_s_at, 1570251_at                                             | 241683_at,<br>241955_at,                                                                | hect domain containing 1                                                                                            |
| 221551_x_at,<br>228163_at                                                                          | 223285_s_at,                                                                            | st6<br>(alpha-n-acetyl-neuraminy-2,3-beta-galactosyl-1,3)-n-acetylgalactosa<br>minide alpha-2,6-sialyltransferase 4 |
| 205994_at, 230549_at, 206919_at                                                                    |                                                                                         | elk4, ets-domain protein (srf accessory protein 1)                                                                  |
| 237411_at                                                                                          |                                                                                         | adam metalloproteinase with thrombospondin type 1 motif, 6                                                          |
| 218778_x_at,<br>91826_at,<br>218779_x_at                                                           | 221655_x_at,<br>221665_s_at,                                                            | eps8-like 1                                                                                                         |
| 1553994_at,<br>203939_at, 227486_at                                                                | 1553995_a_at,                                                                           | 5'-nucleotidase, ecto (cd73)                                                                                        |
| 1565483_at,<br>243327_at,<br>233044_at,<br>224999_at,<br>211551_at,<br>201984_s_at,<br>201983_s_at | 210984_x_at,<br>237938_at,<br>232541_at,<br>211607_x_at,<br>211550_at,<br>1565484_x_at, | epidermal growth factor receptor (erythroblastic leukemia viral<br>(v-erb-b) oncogene homolog, avian)               |
| 238020_at                                                                                          |                                                                                         | solute carrier family 26, member 5 (prestin)                                                                        |
| 204306_s_at                                                                                        |                                                                                         | cd151 antigen (raph blood group)                                                                                    |
| 203061_s_at, 203062_s_at                                                                           |                                                                                         | mediator of dna damage checkpoint 1                                                                                 |
| 205080_at, 208530_s_at                                                                             |                                                                                         | retinoic acid receptor, beta                                                                                        |
| 224912_at,<br>240454_at, 240369_at, 224923_at                                                      | 224924_at,                                                                              | tetratricopeptide repeat domain 7a                                                                                  |
| 225300_at                                                                                          |                                                                                         | chromosome 15 open reading frame 23                                                                                 |

|                                       |                              |                                                                                                                  |
|---------------------------------------|------------------------------|------------------------------------------------------------------------------------------------------------------|
| 207931_s_at,<br>209992_at             | 226733_at,                   | 6-phosphofructo-2-kinase/fructose-2,6-biphosphatase 2                                                            |
| 1569353_at, 204662_at                 |                              | cp110 protein                                                                                                    |
| 1552768_at, 223460_at                 |                              | calcium/calmodulin-dependent protein kinase kinase 1, alpha                                                      |
| 208680_at                             |                              | peroxiredoxin 1                                                                                                  |
| 211980_at, 233652_at, 211981_at       |                              | collagen, type iv, alpha 1                                                                                       |
| 232116_at                             |                              | grainyhead-like 3 (drosophila)                                                                                   |
| 202180_s_at, 231878_at                |                              | major vault protein                                                                                              |
| 1554018_at, 201141_at                 |                              | glycoprotein (transmembrane) nmb                                                                                 |
| 207978_s_at, 216979_at                |                              | nuclear receptor subfamily 4, group a, member 3                                                                  |
| 1564653_s_at                          |                              | flj16641 protein                                                                                                 |
| 200019_s_at                           |                              | finkel-biskis-reilly murine sarcoma virus (fbr-musv) ubiquitously expressed (fox derived); ribosomal protein s30 |
| 220532_s_at                           |                              | lr8 protein                                                                                                      |
| 222173_s_at                           |                              | tbc1 domain family, member 2                                                                                     |
| 223784_at                             |                              | transmembrane protein 27                                                                                         |
| 209414_at,<br>240849_at,<br>209415_at | 211865_s_at,<br>209416_s_at, | homolog of yeast cdh1/hct1                                                                                       |
| 218036_x_at,<br>231870_s_at           | 222497_x_at,                 | nmd3 homolog (s. cerevisiae)                                                                                     |
| 204356_at, 204357_s_at                |                              | lim domain kinase 1                                                                                              |
| 205756_s_at                           |                              | coagulation factor viii, procoagulant component (hemophilia a)                                                   |
| 220353_at                             |                              | hypothetical protein flj10661                                                                                    |
| 209558_s_at,<br>209559_at             | 38340_at,                    | huntingtin interacting protein 1 related                                                                         |
| 225763_at, 239328_at, 232623_at       |                              | rcsd domain containing 1                                                                                         |
| 1558195_at                            |                              | hypothetical protein loc283404                                                                                   |
| 1560276_at, 1560277_a_at              |                              | hypothetical protein loc283403                                                                                   |
| 220924_s_at, 222982_x_at              |                              | solute carrier family 38, member 2                                                                               |
| 206763_at                             |                              | fk506 binding protein 6, 36kda                                                                                   |
| 1568913_at, 219458_s_at               |                              | nol1/nop2/sun domain family, member 3                                                                            |
| 1566207_at,<br>216241_s_at            | 241559_at,                   | transcription elongation factor a (sii), 1                                                                       |
| 214192_at,<br>225092_at               | 230274_s_at,                 | rabaptin, rab gtpase binding effector protein 1                                                                  |
| 228558_at                             |                              | chromosome 14 open reading frame 80                                                                              |
| 215043_s_at                           |                              | sma3                                                                                                             |
| 226726_at                             |                              | o-acyltransferase (membrane bound) domain containing 2                                                           |
| 1562849_at                            |                              | .gb:bq002451 /db_xref=gi:19727351                                                                                |

|                                                                     |                                                                                                                                                                                                      |
|---------------------------------------------------------------------|------------------------------------------------------------------------------------------------------------------------------------------------------------------------------------------------------|
|                                                                     | /db_xref=ui-h-ei1-ayw-g-20-0-ui.s1 /clone=image:5844523<br>/tid=hs2.364299.1 /cnt=2 /fea=mrna /tier=consend /stk=0<br>/ug=hs.364299 /ug_title=homo sapiens cdna flj37115 fis, clone<br>brace2022158. |
| 203002_at                                                           | kiaa0989 protein                                                                                                                                                                                     |
| 213230_at                                                           | cerebellar degeneration-related protein 2-like                                                                                                                                                       |
| 205266_at                                                           | leukemia inhibitory factor (cholinergic differentiation factor)                                                                                                                                      |
| 221530_s_at, 223185_s_at,<br>231242_at, 231243_s_at                 | basic helix-loop-helix domain containing, class b, 3                                                                                                                                                 |
| 223869_at                                                           | sclerosteosis                                                                                                                                                                                        |
| 207661_s_at, 224817_at,<br>230767_at, 213252_at, 243853_at          | sh3 and px domains 2a                                                                                                                                                                                |
| 209130_at, 214544_s_at,<br>229773_at, 209131_s_at                   | synaptosomal-associated protein, 23kda                                                                                                                                                               |
| 208112_x_at, 209039_x_at,<br>239060_at, 222221_x_at,<br>209037_s_at | eh-domain containing 1                                                                                                                                                                               |
| 215011_at                                                           | rna, u17d small nucleolar                                                                                                                                                                            |
| 1553535_a_at, 212125_at,<br>212127_at                               | ran gtpase activating protein 1                                                                                                                                                                      |
| 224569_s_at, 227389_x_at,<br>225854_x_at, 224571_at,<br>224572_s_at | interferon regulatory factor 2 binding protein 2                                                                                                                                                     |
| 204351_at                                                           | s100 calcium binding protein p                                                                                                                                                                       |
| 1564459_at, 214347_s_at,<br>236774_at, 205311_at,<br>236775_s_at    | dopa decarboxylase (aromatic l-amino acid decarboxylase)                                                                                                                                             |
| 215161_at, 217128_s_at                                              | calcium/calmodulin-dependent protein kinase ig                                                                                                                                                       |
| 221085_at                                                           | tumor necrosis factor (ligand) superfamily, member 15                                                                                                                                                |
| 215470_at, 221540_x_at,<br>223758_s_at                              | general transcription factor iih, polypeptide 2, 44kda                                                                                                                                               |
| 214693_x_at                                                         | neuroblastoma breakpoint family, member 9                                                                                                                                                            |
| 211389_x_at                                                         | killer cell immunoglobulin-like receptor, three domains, long<br>cytoplasmic tail, 1                                                                                                                 |
| 208188_at                                                           | keratin 9 (epidermolytic palmoplantar keratoderma)                                                                                                                                                   |
| 224915_x_at, 226835_s_at,<br>226227_x_at                            | transaldolase 1                                                                                                                                                                                      |
| 208122_x_at                                                         | killer cell immunoglobulin-like receptor, two domains, short<br>cytoplasmic tail, 3                                                                                                                  |
| 1554280_a_at                                                        | chromosome 9 open reading frame 43                                                                                                                                                                   |
| 206750_at, 236053_at, 226206_at                                     | v-maf musculoaponeurotic fibrosarcoma oncogene homolog k (avian)                                                                                                                                     |



|                                                       |                                                                                                                                                                                                                                                                                                                                                                                                                                                                                                                         |
|-------------------------------------------------------|-------------------------------------------------------------------------------------------------------------------------------------------------------------------------------------------------------------------------------------------------------------------------------------------------------------------------------------------------------------------------------------------------------------------------------------------------------------------------------------------------------------------------|
| 222669_s_at                                           | shwachman-bodian-diamond syndrome                                                                                                                                                                                                                                                                                                                                                                                                                                                                                       |
| 215610_at, 215614_at                                  | hypothetical protein loc442092                                                                                                                                                                                                                                                                                                                                                                                                                                                                                          |
| 1560620_at, 220540_at                                 | potassium channel, subfamily k, member 15                                                                                                                                                                                                                                                                                                                                                                                                                                                                               |
| 219105_x_at                                           | origin recognition complex, subunit 6 homolog-like (yeast)                                                                                                                                                                                                                                                                                                                                                                                                                                                              |
| 1558553_at                                            | .gb:bg005406 /db_xref=gi:12447537<br>/db_xref=pm1-gn0180-241100-003-d07 /tid=hs2.344078.1 /cnt=11<br>/fea=mrna /tier=consend /stk=0 /ug=hs.344078 /ug_title=homo sapiens, clone image:3840457, mrna                                                                                                                                                                                                                                                                                                                     |
| 218328_at, 228931_at                                  | coenzyme q4 homolog (yeast)                                                                                                                                                                                                                                                                                                                                                                                                                                                                                             |
| 203984_s_at, 210775_x_at                              | caspase 9, apoptosis-related cysteine peptidase                                                                                                                                                                                                                                                                                                                                                                                                                                                                         |
| 200625_s_at, 213798_s_at                              | cap, adenylate cyclase-associated protein 1 (yeast)                                                                                                                                                                                                                                                                                                                                                                                                                                                                     |
| 205409_at, 225262_at, 218880_at, 228188_at, 241824_at | fos-like antigen 2                                                                                                                                                                                                                                                                                                                                                                                                                                                                                                      |
| 201653_at                                             | cornichon homolog (drosophila)                                                                                                                                                                                                                                                                                                                                                                                                                                                                                          |
| 1554973_a_at, 227162_at                               | zinc finger and btb domain containing 26                                                                                                                                                                                                                                                                                                                                                                                                                                                                                |
| 221294_at                                             | g protein-coupled receptor 21                                                                                                                                                                                                                                                                                                                                                                                                                                                                                           |
| 218638_s_at                                           | spondin 2, extracellular matrix protein                                                                                                                                                                                                                                                                                                                                                                                                                                                                                 |
| 214365_at, 222976_s_at, 224164_at, 238079_at          | tropomyosin 3                                                                                                                                                                                                                                                                                                                                                                                                                                                                                                           |
| 201031_s_at, 213619_at, 213472_at, 213470_s_at        | heterogeneous nuclear ribonucleoprotein h1 (h)                                                                                                                                                                                                                                                                                                                                                                                                                                                                          |
| 1555862_s_at, 241478_at, 219332_at                    | mical-like 2                                                                                                                                                                                                                                                                                                                                                                                                                                                                                                            |
| 203217_s_at, 239755_at, 216075_at                     | st3 beta-galactoside alpha-2,3-sialyltransferase 5                                                                                                                                                                                                                                                                                                                                                                                                                                                                      |
| 209802_at, 209803_s_at, 229494_s_at                   | pleckstrin homology-like domain, family a, member 2                                                                                                                                                                                                                                                                                                                                                                                                                                                                     |
| 204003_s_at, 230401_at                                | nucleoporin like 2                                                                                                                                                                                                                                                                                                                                                                                                                                                                                                      |
| 1558920_at                                            | .gb:bc043380.1 /db_xref=gi:27694291 /tid=hs2.221776.1 /cnt=6<br>/fea=mrna /tier=consend /stk=0 /ug=hs.221776 /ug_title=homo sapiens, clone image:5223469, mrna /def=homo sapiens, mrna.                                                                                                                                                                                                                                                                                                                                 |
| 217610_at                                             | .consensus includes gb:al047879 /fea=est /db_xref=gi:4728067<br>/db_xref=est:dkfzp586n1222_s1 /clone=dkfzp586n1222<br>/ug=hs.194251 ests, weakly similar to alu2_human alu subfamily sb<br>sequence contamination warning entry h.sapiens.gb:al047879<br>/db_xref=gi:4728067 /db_xref=dkfzp586n1222_s1<br>/clone=dkfzp586n1222 /fea=est /cnt=5 /tid=hs.194251.0 /tier=consend<br>/stk=0 /ug=hs.194251 /ug_title=ests, weakly similar to alu2_human alu<br>subfamily sb sequence contamination warning entry (h.sapiens) |
| 1561056_a_at, 1564378_a_at, 215206_at, 234634_at,     | exostoses (multiple) 1                                                                                                                                                                                                                                                                                                                                                                                                                                                                                                  |

|                                                      |                                       |                                                                                                                                                                                                                                                                                                                                       |
|------------------------------------------------------|---------------------------------------|---------------------------------------------------------------------------------------------------------------------------------------------------------------------------------------------------------------------------------------------------------------------------------------------------------------------------------------|
| 242126_at,<br>239227_at,<br>232174_at,<br>1562863_at | 239414_at,<br>237310_at,<br>201995_at |                                                                                                                                                                                                                                                                                                                                       |
| 244855_at                                            |                                       | ,consensus includes gb:aw295341 /fea=est /db_xref=gi:6701977<br>/db_xref=est:ui-h-bi2-ahv-b-12-0-ui.s1 /clone=image:2727911<br>/ug=hs.173412 ests,gb:aw295341 /db_xref=gi:6701977<br>/db_xref=ui-h-bi2-ahv-b-12-0-ui.s1 /clone=image:2727911 /fea=est<br>/cnt=5 /tid=hs.173412.0 /tier=consend /stk=1 /ug=hs.173412<br>/ug_title=ests |
| 225450_at,<br>235277_at,<br>240877_x_at              | 228840_at,<br>225459_at               | likely ortholog of mouse junction-enriched and associated protein                                                                                                                                                                                                                                                                     |
| 228468_at                                            |                                       | microtubule associated serine/threonine kinase-like                                                                                                                                                                                                                                                                                   |
| 208163_s_at,<br>227946_at                            | 210344_at                             | oxysterol binding protein-like 7                                                                                                                                                                                                                                                                                                      |
| 204538_x_at                                          |                                       | similar to nuclear pore complex interacting protein                                                                                                                                                                                                                                                                                   |
| 219265_at, 226844_at, 229568_at                      |                                       | mob1, mps one binder kinase activator-like 2b (yeast)                                                                                                                                                                                                                                                                                 |
| 209260_at                                            |                                       | stratifin                                                                                                                                                                                                                                                                                                                             |
| 1557068_at, 207649_at                                |                                       | keratin, hair, acidic, 7                                                                                                                                                                                                                                                                                                              |
| 1554283_at, 220671_at                                |                                       | ccr4 carbon catabolite repression 4-like (s. cerevisiae)                                                                                                                                                                                                                                                                              |
| 224624_at, 233487_s_at                               |                                       | leucine rich repeat containing 8 family, member a                                                                                                                                                                                                                                                                                     |
| 1555717_at,<br>231005_at                             | 1555718_x_at                          | set domain containing 6                                                                                                                                                                                                                                                                                                               |
| 212625_at                                            |                                       | syntaxin 10                                                                                                                                                                                                                                                                                                                           |
| 202141_s_at,<br>243152_at,<br>202142_at, 202143_s_at | 236204_at,<br>214260_at               | cop9 constitutive photomorphogenic homolog subunit 8 (arabidopsis)                                                                                                                                                                                                                                                                    |
| 230062_at                                            |                                       | dkfzp434h0735 protein                                                                                                                                                                                                                                                                                                                 |
| 1561080_at, 201266_at                                |                                       | thioredoxin reductase 1                                                                                                                                                                                                                                                                                                               |
| 200908_s_at, 200909_s_at                             |                                       | ribosomal protein, large, p2                                                                                                                                                                                                                                                                                                          |
| 209975_at,<br>222100_at                              | 209976_s_at                           | cytochrome p450, family 2, subfamily e, polypeptide 1                                                                                                                                                                                                                                                                                 |
| 229484_at                                            |                                       | protein phosphatase 1j (pp2c domain containing)                                                                                                                                                                                                                                                                                       |
| 201584_s_at                                          |                                       | dead (asp-glu-ala-asp) box polypeptide 39                                                                                                                                                                                                                                                                                             |
| 206739_at                                            |                                       | homeobox c5                                                                                                                                                                                                                                                                                                                           |
| 209286_at,<br>209288_s_at                            | 209287_s_at                           | cdc42 effector protein (rho gtpase binding) 3                                                                                                                                                                                                                                                                                         |
| 203846_at, 236233_at                                 |                                       | tripartite motif-containing 32                                                                                                                                                                                                                                                                                                        |
| 244077_at                                            |                                       | chromosome 10 open reading frame 113                                                                                                                                                                                                                                                                                                  |
| 1557071_s_at, 1560109_s_at                           |                                       | nedd8 ultimate buster-1                                                                                                                                                                                                                                                                                                               |

|                                                                             |                                                                                                                                                                                                                                                                         |
|-----------------------------------------------------------------------------|-------------------------------------------------------------------------------------------------------------------------------------------------------------------------------------------------------------------------------------------------------------------------|
| 222512_at, 234332_at,<br>1569030_s_at, 1560108_at,<br>1559732_at            |                                                                                                                                                                                                                                                                         |
| 225582_at                                                                   | kiaa1754                                                                                                                                                                                                                                                                |
| 213147_at, 213150_at                                                        | homeobox a10                                                                                                                                                                                                                                                            |
| 202676_x_at, 210975_x_at                                                    | fas-activated serine/threonine kinase                                                                                                                                                                                                                                   |
| 218596_at, 44696_at                                                         | tbc1 domain family, member 13                                                                                                                                                                                                                                           |
| 227680_at, 234093_at, 241720_at                                             | hypothetical protein flj20403 similar to zinc finger protein 326                                                                                                                                                                                                        |
| 236175_at                                                                   | tripartite motif-containing 55                                                                                                                                                                                                                                          |
| 1554148_a_at, 1559232_a_at,<br>203164_at, 203165_s_at                       | solute carrier family 33 (acetyl-coa transporter), member 1                                                                                                                                                                                                             |
| 219515_at, 1570122_at,<br>240224_at                                         | pr domain containing 10                                                                                                                                                                                                                                                 |
| 232710_at                                                                   | loc402553                                                                                                                                                                                                                                                               |
| 209626_s_at, 209627_s_at                                                    | oxysterol binding protein-like 3                                                                                                                                                                                                                                        |
| 1559622_at                                                                  | .gb:al833433.1 /db_xref=gi:21734075 /tid=hs2.407114.1 /cnt=5<br>/fea=mrna /tier=consend /stk=0 /ug=hs.407114 /ug_title=homo<br>sapiens mrna; cdna dkfzp313o2039 (from clone dkfzp313o2039)<br>/def=homo sapiens mrna; cdna dkfzp313o2039 (from clone<br>dkfzp313o2039). |
| 203327_at, 203328_x_at,<br>217496_s_at                                      | insulin-degrading enzyme                                                                                                                                                                                                                                                |
| 201235_s_at, 201236_s_at                                                    | btg family, member 2                                                                                                                                                                                                                                                    |
| 207607_at, 229215_at                                                        | achaete-scute complex-like 2 (drosophila)                                                                                                                                                                                                                               |
| 1559025_at, 1560163_at,<br>208657_s_at, 41220_at,<br>239030_at, 207425_s_at | septin 9                                                                                                                                                                                                                                                                |
| 1558697_a_at, 243596_at                                                     | limkain b1                                                                                                                                                                                                                                                              |
| 1570244_at, 231487_at                                                       | cytochrome c oxidase subunit 8c                                                                                                                                                                                                                                         |
| 1566441_at, 221272_s_at,<br>1566442_at, 223125_s_at,<br>223126_s_at         | chromosome 1 open reading frame 21                                                                                                                                                                                                                                      |
| 219417_s_at, 222882_s_at                                                    | chromosome 17 open reading frame 59                                                                                                                                                                                                                                     |
| 1557079_at, 1557080_s_at,<br>233185_at, 205422_s_at                         | integrin, beta-like 1 (with egf-like repeat domains)                                                                                                                                                                                                                    |
| 218301_at                                                                   | arginyl aminopeptidase (aminopeptidase b)-like 1                                                                                                                                                                                                                        |
| 225890_at, 242453_at                                                        | chromosome 20 open reading frame 72                                                                                                                                                                                                                                     |
| 1559924_at                                                                  | .gb:bc039429.1 /db_xref=gi:24658358 /tid=hs2.344350.1 /cnt=4<br>/fea=mrna /tier=consend /stk=0 /ug=hs.344350 /ug_title=homo<br>sapiens, clone image:5303182, mrna /def=homo sapiens, mrna.                                                                              |
| 1554538_at, 219045_at,                                                      | ras homolog gene family, member f (in filopodia)                                                                                                                                                                                                                        |

|                                                                    |                                                                                                                                                                                                                                                                                          |
|--------------------------------------------------------------------|------------------------------------------------------------------------------------------------------------------------------------------------------------------------------------------------------------------------------------------------------------------------------------------|
| 222812_s_at, 1554539_a_at                                          |                                                                                                                                                                                                                                                                                          |
| 1559925_s_at                                                       | ,gb:bc039429.1 /db_xref=gi:24658358 /tid=hs2.344350.1 /cnt=4 /fea=mrna /tier=consend /stk=0 /ug=hs.344350 /ug_title=homo sapiens, clone image:5303182, mrna /def=homo sapiens, mrna.                                                                                                     |
| 218973_at                                                          | elongation factor tu gtp binding domain containing 1                                                                                                                                                                                                                                     |
| 1554903_at, 210043_at, 1554905_x_at                                | fksg44 gene                                                                                                                                                                                                                                                                              |
| 1568836_at, 228751_at, 241403_at                                   | cdc-like kinase 4                                                                                                                                                                                                                                                                        |
| 1560524_at                                                         | grb2-related adaptor protein-like                                                                                                                                                                                                                                                        |
| 223019_at, 233974_s_at                                             | chromosome 9 open reading frame 88                                                                                                                                                                                                                                                       |
| 205717_x_at, 211066_x_at, 211876_x_at, 209079_x_at, 215836_s_at    | fibroblast cadherin fib3                                                                                                                                                                                                                                                                 |
| 219091_s_at, 222822_s_at                                           | multimerin 2                                                                                                                                                                                                                                                                             |
| 205092_x_at, 213376_at, 242258_at, 238707_at                       | zinc finger and btb domain containing 1                                                                                                                                                                                                                                                  |
| 227915_at, 233857_s_at                                             | ankyrin repeat and socs box-containing 2                                                                                                                                                                                                                                                 |
| 206636_at, 230669_at                                               | ras p21 protein activator 2                                                                                                                                                                                                                                                              |
| 1554165_at, 203206_at, 244634_at, 237297_at                        | family with sequence similarity 53, member b                                                                                                                                                                                                                                             |
| 230769_at, 233294_at                                               | denn/madd domain containing 2c                                                                                                                                                                                                                                                           |
| 1552487_a_at, 206581_at                                            | basonuclin 1                                                                                                                                                                                                                                                                             |
| 221802_s_at                                                        | kiaa1598                                                                                                                                                                                                                                                                                 |
| 239746_at                                                          | mesoderm development candidate 2                                                                                                                                                                                                                                                         |
| 1556554_at, 229949_at, 1565802_at, 231014_at, 240683_at, 238941_at | tripartite motif-containing 50a                                                                                                                                                                                                                                                          |
| 204206_at, 236749_at                                               | max binding protein                                                                                                                                                                                                                                                                      |
| 218644_at                                                          | pleckstrin 2                                                                                                                                                                                                                                                                             |
| 239032_at                                                          | chromosome 1 open reading frame 114                                                                                                                                                                                                                                                      |
| 204856_at                                                          | udp-glcnaц:betagal beta-1,3-n-acetylglucosaminyltransferase 3                                                                                                                                                                                                                            |
| 227148_at, 243650_at, 242436_at, 239568_at                         | pleckstrin homology domain containing, family h (with myth4 domain) member 2                                                                                                                                                                                                             |
| 224915_x_at, 226835_s_at, 229899_s_at, 226227_x_at                 | similar to rpe-spondin                                                                                                                                                                                                                                                                   |
| 244270_at                                                          | ,consensus includes gb:ai125785 /fea=est /db_xref=gi:3594299 /db_xref=est:qd95f06.x1 /clone=image:1737251 /ug=hs.153351 ests,gb:ai125785 /db_xref=gi:3594299 /db_xref=qd95f06.x1 /clone=image:1737251 /fea=est /cnt=3 /tid=hs.153351.0 /tier=consend /stk=3 /ug=hs.153351 /ug_title=ests |

|                                                                                    |                                                                                                                                                                                                                          |
|------------------------------------------------------------------------------------|--------------------------------------------------------------------------------------------------------------------------------------------------------------------------------------------------------------------------|
| 202975_s_at, 216048_s_at,<br>225202_at, 240111_at,<br>216049_at, 202976_s_at       | rho-related btb domain containing 3                                                                                                                                                                                      |
| 1569854_at, 212263_at,<br>212262_at, 234489_at,<br>241938_at, 243638_at, 234492_at | quaking homolog, kh domain rna binding (mouse)                                                                                                                                                                           |
| 201650_at, 228491_at                                                               | keratin 19                                                                                                                                                                                                               |
| 208381_s_at, 212321_at,<br>236895_at, 212322_at                                    | sphingosine-1-phosphate lyase 1                                                                                                                                                                                          |
| 230930_at                                                                          | hypothetical protein loc338620                                                                                                                                                                                           |
| 1554352_s_at, 214787_at,<br>230607_at                                              | denn/madd domain containing 4a                                                                                                                                                                                           |
| 1556042_s_at, 226369_at                                                            | hypothetical locus loc338799                                                                                                                                                                                             |
| 230966_at                                                                          | interleukin 4 induced 1                                                                                                                                                                                                  |
| 239631_at                                                                          | flj43505 protein                                                                                                                                                                                                         |
| 204484_at                                                                          | phosphoinositide-3-kinase, class 2, beta polypeptide                                                                                                                                                                     |
| 230497_at, 232416_at, 231744_at                                                    | bruno-like 5, rna binding protein (drosophila)                                                                                                                                                                           |
| 201065_s_at, 210891_s_at                                                           | general transcription factor ii, i, pseudogene 1                                                                                                                                                                         |
| 219468_s_at, 227667_at                                                             | cue domain containing 1                                                                                                                                                                                                  |
| 209496_at                                                                          | retinoic acid receptor responder (tazarotene induced) 2                                                                                                                                                                  |
| 204790_at                                                                          | smad, mothers against dpp homolog 7 (drosophila)                                                                                                                                                                         |
| 1565863_at, 242991_at,<br>243148_at, 237132_at, 202085_at                          | tight junction protein 2 (zona occludens 2)                                                                                                                                                                              |
| 1559467_at                                                                         | .gb:bi520422 /db_xref=gi:15345214 /db_xref=603071605f1<br>/clone=image:5163721 /tid=hs2.407031.1 /cnt=7 /fea=mrna<br>/tier=consend /stk=0 /ug=hs.407031 /ug_title=homo sapiens cdna<br>flj36734 fis, clone uteru2012890. |
| 201577_at                                                                          | non-metastatic cells 1, protein (nm23a) expressed in                                                                                                                                                                     |
| 209908_s_at, 228121_at,<br>209909_s_at, 220407_s_at,<br>220406_at                  | transforming growth factor, beta 2                                                                                                                                                                                       |
| 205581_s_at, 229093_at                                                             | nitric oxide synthase 3 (endothelial cell)                                                                                                                                                                               |
| 202593_s_at, 226214_at                                                             | membrane interacting protein of rgs16                                                                                                                                                                                    |
| 1560051_at, 204032_at,<br>239908_at, 239156_at                                     | breast cancer anti-estrogen resistance 3                                                                                                                                                                                 |
| 223343_at, 223344_s_at,<br>224358_s_at                                             | membrane-spanning 4-domains, subfamily a, member 7                                                                                                                                                                       |
| 236245_at                                                                          | outer dense fiber of sperm tails 3-like 1                                                                                                                                                                                |
| 219033_at                                                                          | poly (adp-ribose) polymerase family, member 8                                                                                                                                                                            |
| 219146_at, 238295_at                                                               | chromosome 17 open reading frame 42                                                                                                                                                                                      |
| 226579_at                                                                          | x-ray repair complementing defective repair in chinese hamster cells 3                                                                                                                                                   |

|                                                                     |                                                                            |
|---------------------------------------------------------------------|----------------------------------------------------------------------------|
| 1562017_at                                                          | cdna flj37924 fis, clone ctong2000218                                      |
| 204592_at, 210684_s_at                                              | discs, large homolog 4 (drosophila)                                        |
| 205724_at, 221854_at                                                | plakophilin 1 (ectodermal dysplasia/skin fragility syndrome)               |
| 217042_at, 217775_s_at,<br>217776_at, 232359_at                     | retinol dehydrogenase 11 (all-trans and 9-cis)                             |
| 1564823_at                                                          | cdc42 binding protein kinase gamma (dmpk-like)                             |
| 218636_s_at, 65884_at                                               | mannosidase, alpha, class 1b, member 1                                     |
| 221843_s_at, 233423_at,<br>65438_at, 222261_at                      | kiaa1609 protein                                                           |
| 1563743_at                                                          | hypothetical protein flj35487                                              |
| 218383_at                                                           | chromosome 14 open reading frame 94                                        |
| 215410_at, 215412_x_at                                              | postmeiotic segregation increased 2-like 2                                 |
| 208285_at                                                           | olfactory receptor, family 7, subfamily a, member 5                        |
| 1554992_at, 210550_s_at                                             | ras protein-specific guanine nucleotide-releasing factor 1                 |
| 214740_at                                                           | hypothetical protein mgc13098                                              |
| 1555353_at, 1569042_at,<br>200785_s_at, 200784_s_at                 | low density lipoprotein-related protein 1 (alpha-2-macroglobulin receptor) |
| 244766_at                                                           | slc7a5 pseudogene                                                          |
| 210057_at, 224842_at, 244766_at                                     | pi-3-kinase-related kinase smg-1                                           |
| 214143_x_at                                                         | solute carrier family 36 (proton/amino acid symporter), member 2           |
| 203098_at, 203100_s_at,<br>240594_at, 203099_s_at                   | chromodomain protein, y-like                                               |
| 1556056_at, 213221_s_at,<br>233648_at, 223430_at,<br>1557459_at     | snf1-like kinase 2                                                         |
| 232964_at                                                           | williams beuren syndrome chromosome region 19                              |
| 1562648_at, 221078_s_at,<br>238759_at, 239233_at, 225045_at         | hypothetical protein loc55580                                              |
| 204532_x_at, 221304_at,<br>207126_x_at, 208596_s_at,<br>215125_s_at | udp glucuronosyltransferase 1 family, polypeptide a10                      |
| 218965_s_at, 232273_at                                              | rna binding motif protein 21                                               |
| 1560161_at, 232768_at,<br>202705_at                                 | cyclin b2                                                                  |
| 201874_at, 210087_s_at,<br>201875_s_at, 210210_at,<br>210594_x_at   | myelin protein zero-like 1                                                 |
| 218276_s_at, 234491_s_at,<br>238729_x_at, 236606_at,<br>222573_s_at | salvador homolog 1 (drosophila)                                            |
| 217800_s_at, 222423_at,                                             | nedd4 family interacting protein 1                                         |

|                                               |                                                                                                                                                           |
|-----------------------------------------------|-----------------------------------------------------------------------------------------------------------------------------------------------------------|
| 222422_s_at                                   |                                                                                                                                                           |
| 213097_s_at                                   | zuotin related factor 1                                                                                                                                   |
| 1567027_at,<br>1567030_at                     | 1567028_s_at,<br>sh3-domain grb2-like pseudogene 2                                                                                                        |
| 205207_at                                     | interleukin 6 (interferon, beta 2)                                                                                                                        |
| 226545_at, 239719_at, 229900_at               | cd109 antigen (gov platelet alloantigens)                                                                                                                 |
| 201945_at                                     | furin (paired basic amino acid cleaving enzyme)                                                                                                           |
| 223174_at                                     | btb (poz) domain containing 10                                                                                                                            |
| 225331_at                                     | coiled-coil domain containing 50                                                                                                                          |
| 204760_s_at, 31637_s_at                       | nuclear receptor subfamily 1, group d, member 1                                                                                                           |
| 1558560_s_at,<br>32088_at, 203840_at          | 210462_at,<br>basic leucine zipper nuclear factor 1 (jem-1)                                                                                               |
| 1565783_at, 1565784_at                        | cdna flj36796 fis, clone adrgl2006817                                                                                                                     |
| 214168_s_at,<br>202011_at, 243184_at          | 215428_at,<br>tight junction protein 1 (zona occludens 1)                                                                                                 |
| 1563386_at,<br>1564368_a_at                   | 234670_at,<br>amelogenin (amelogenesis imperfecta 1, x-linked)                                                                                            |
| 226837_at,<br>233039_at, 235074_at, 244439_at | 233465_at,<br>sprouty-related, evh1 domain containing 1                                                                                                   |
| 1555167_s_at,<br>217739_s_at, 236495_at       | 243296_at,<br>pre-b-cell colony enhancing factor 1                                                                                                        |
| 204833_at, 213026_at                          | atg12 autophagy related 12 homolog (s. cerevisiae)                                                                                                        |
| 1553613_s_at, 213260_at                       | forkhead box c1                                                                                                                                           |
| 219554_at                                     | rh family, c glycoprotein                                                                                                                                 |
| 227478_at                                     | hypothetical protein loc284262                                                                                                                            |
| 229231_at                                     | leucine rich repeat containing 37b                                                                                                                        |
| 216598_s_at                                   | chemokine (c-c motif) ligand 2                                                                                                                            |
| 208483_x_at                                   | keratin, hair, acidic, 3a                                                                                                                                 |
| 212704_at, 217594_at, 230713_at               | zinc finger, cchc domain containing 11                                                                                                                    |
| 203925_at, 236140_at                          | glutamate-cysteine ligase, modifier subunit                                                                                                               |
| 1555832_s_at,<br>208960_s_at, 208961_s_at     | 211610_at,<br>kruppel-like factor 6                                                                                                                       |
| 1552910_at, 1552911_at                        | sialic acid binding ig-like lectin 11                                                                                                                     |
| 209955_s_at                                   | fibroblast activation protein, alpha                                                                                                                      |
| 226362_at, 226365_at                          | similar to cadherin 12, type 2 preproprotein; br-cadherin; cadherin-12;<br>n-cadherin 2; brain-cadherin; neuronal cadherin 2; cadherin, neural<br>type, 2 |
| 215236_s_at,<br>239274_at,<br>212511_at,      | 236552_at,<br>239102_s_at,<br>212506_at,<br>phosphatidylinositol binding clathrin assembly protein                                                        |

|                                                        |                                                                                                                                                                                                                                                                                                                                                                                                                                                                        |
|--------------------------------------------------------|------------------------------------------------------------------------------------------------------------------------------------------------------------------------------------------------------------------------------------------------------------------------------------------------------------------------------------------------------------------------------------------------------------------------------------------------------------------------|
| 203134_at, 215832_x_at                                 |                                                                                                                                                                                                                                                                                                                                                                                                                                                                        |
| 202609_at, 238371_s_at, 238372_s_at                    | epidermal growth factor receptor pathway substrate 8                                                                                                                                                                                                                                                                                                                                                                                                                   |
| 219950_s_at, 222942_s_at, 234301_s_at                  | t-cell lymphoma invasion and metastasis 2                                                                                                                                                                                                                                                                                                                                                                                                                              |
| 202129_s_at, 202130_at, 202131_s_at, 240583_at         | rio kinase 3 (yeast)                                                                                                                                                                                                                                                                                                                                                                                                                                                   |
| 226264_at                                              | sushi domain containing 1                                                                                                                                                                                                                                                                                                                                                                                                                                              |
| 1570219_at, 227145_at                                  | lysyl oxidase-like 4                                                                                                                                                                                                                                                                                                                                                                                                                                                   |
| 231068_at                                              | hypothetical protein flj31196                                                                                                                                                                                                                                                                                                                                                                                                                                          |
| 202079_s_at, 202080_s_at, 226013_at, 214924_s_at       | trafficking protein, kinesin binding 1                                                                                                                                                                                                                                                                                                                                                                                                                                 |
| 225464_at, 225481_at                                   | ferm domain containing 6                                                                                                                                                                                                                                                                                                                                                                                                                                               |
| 1558356_at, 223279_s_at, 238868_at                     | uveal autoantigen with coiled-coil domains and ankyrin repeats                                                                                                                                                                                                                                                                                                                                                                                                         |
| 1554409_at, 221247_s_at, 238132_at, 1554410_a_at       | williams-beuren syndrome chromosome region 16                                                                                                                                                                                                                                                                                                                                                                                                                          |
| 1562281_at, 213968_at, 209890_at, 225388_at, 237194_at | tetraspanin 5                                                                                                                                                                                                                                                                                                                                                                                                                                                          |
| 205595_at                                              | desmoglein 3 (pemphigus vulgaris antigen)                                                                                                                                                                                                                                                                                                                                                                                                                              |
| 239944_at                                              | baculoviral iap repeat-containing 1                                                                                                                                                                                                                                                                                                                                                                                                                                    |
| 221676_s_at, 222409_at                                 | coronin, actin binding protein, 1c                                                                                                                                                                                                                                                                                                                                                                                                                                     |
| 215182_x_at                                            | ,consensus includes gb:al050122.1 /def=homo sapiens mrna; cdna dkfzp586e121 (from clone dkfzp586e121). /fea=mrna /db_xref=gi:4884330 /ug=hs.274511 homo sapiens mrna; cdna dkfzp586e121 (from clone dkfzp586e121),gb:al050122.1 /db_xref=gi:4884330 /fea=mrna /cnt=6 /tid=hs.274511.0 /tier=consend /stk=0 /ug=hs.274511 /ug_title=homo sapiens mrna; cdna dkfzp586e121 (from clone dkfzp586e121) /def=homo sapiens mrna; cdna dkfzp586e121 (from clone dkfzp586e121). |
| 207723_s_at                                            | killer cell lectin-like receptor subfamily c, member 3                                                                                                                                                                                                                                                                                                                                                                                                                 |
| 209008_x_at                                            | keratin 8                                                                                                                                                                                                                                                                                                                                                                                                                                                              |
| 205931_s_at, 229228_at                                 | camp responsive element binding protein 5                                                                                                                                                                                                                                                                                                                                                                                                                              |
| 215785_s_at, 234143_at                                 | cytoplasmic fmr1 interacting protein 2                                                                                                                                                                                                                                                                                                                                                                                                                                 |
| 221430_s_at, 223886_s_at, 244517_x_at                  | ring finger protein 146                                                                                                                                                                                                                                                                                                                                                                                                                                                |
| 207872_s_at, 210660_at                                 | leukocyte immunoglobulin-like receptor, subfamily a (with tm domain), member 1                                                                                                                                                                                                                                                                                                                                                                                         |
| 210042_s_at, 212562_s_at                               | cathepsin z                                                                                                                                                                                                                                                                                                                                                                                                                                                            |
| 203918_at, 215277_at                                   | protocadherin 1 (cadherin-like 1)                                                                                                                                                                                                                                                                                                                                                                                                                                      |
| 215111_s_at, 235315_at,                                | tsc22 domain family, member 1                                                                                                                                                                                                                                                                                                                                                                                                                                          |



|                                                                                                                                       |                                                                                            |
|---------------------------------------------------------------------------------------------------------------------------------------|--------------------------------------------------------------------------------------------|
| 243133_at, 229990_at                                                                                                                  |                                                                                            |
| 1556145_a_at, 205293_x_at,<br>205294_at, 1562627_at,<br>207832_at, 209502_s_at                                                        | bai1-associated protein 2                                                                  |
| 204479_at                                                                                                                             | osteoclast stimulating factor 1                                                            |
| 1564017_at                                                                                                                            | chromosome 21 open reading frame 123                                                       |
| 209093_s_at, 210589_s_at                                                                                                              | glucosidase, beta; acid (includes glucosylceramidase)                                      |
| 1553103_at, 1553348_a_at,<br>202585_s_at, 210268_at,<br>202584_at                                                                     | nuclear transcription factor, x-box binding 1                                              |
| 240991_at                                                                                                                             | similar to 60s ribosomal protein l32                                                       |
| 240674_at, 203297_s_at,<br>203298_s_at, 232835_at                                                                                     | jumonji, at rich interactive domain 2                                                      |
| 203954_x_at                                                                                                                           | claudin 3                                                                                  |
| 207675_x_at, 210237_at                                                                                                                | artemin                                                                                    |
| 1561276_at, 1570078_a_at,<br>215361_at, 1569590_at,<br>219921_s_at, 230206_at,<br>230263_s_at, 242589_x_at,<br>230207_s_at, 222721_at | dedicator of cytokinesis 5                                                                 |
| 228765_at                                                                                                                             | gtf2i repeat domain containing 2                                                           |
| 227166_at, 238115_at, 227169_at                                                                                                       | dnaj (hsp40) homolog, subfamily c, member 18                                               |
| 204322_at, 204324_s_at,<br>233877_at                                                                                                  | golgi phosphoprotein 4                                                                     |
| 208327_at                                                                                                                             | cytochrome p450, family 2, subfamily a, polypeptide 13                                     |
| 214623_at                                                                                                                             | split hand/foot malformation (ectrodactyly) type 3 pseudogene 1                            |
| 208309_s_at, 210018_x_at,<br>210017_at                                                                                                | mucosa associated lymphoid tissue lymphoma translocation gene 1                            |
| 214693_x_at                                                                                                                           | kiaa1245                                                                                   |
| 233150_at                                                                                                                             | udp-n-acetyl-alpha-d-galactosamine:polypeptide<br>n-acetylgalactosaminyltransferase-like 5 |
| 218921_at, 52940_at                                                                                                                   | single immunoglobulin and toll-interleukin 1 receptor (tir) domain                         |
| 225623_at                                                                                                                             | kiaa1737                                                                                   |
| 202290_at, 217624_at                                                                                                                  | pdgfa associated protein 1                                                                 |
| 206582_s_at, 212070_at                                                                                                                | g protein-coupled receptor 56                                                              |
| 214482_at                                                                                                                             | zinc finger and btb domain containing 25                                                   |
| 209905_at, 214651_s_at,<br>231365_at                                                                                                  | homeobox a9                                                                                |
| 230195_at                                                                                                                             | hypothetical protein                                                                       |
| 207904_s_at, 236728_at,<br>231866_at                                                                                                  | leucyl/cystinyl aminopeptidase                                                             |

|                                                                                                                                                                               |                                                               |
|-------------------------------------------------------------------------------------------------------------------------------------------------------------------------------|---------------------------------------------------------------|
| 201462_at                                                                                                                                                                     | secernin 1                                                    |
| 1552580_at                                                                                                                                                                    | hypothetical protein flj25801                                 |
| 219665_at                                                                                                                                                                     | nudix (nucleoside diphosphate linked moiety x)-type motif 18  |
| 212782_x_at                                                                                                                                                                   | polymerase (rna) ii (dna directed) polypeptide j, 13.3kda     |
| 1564248_at, 238645_at,<br>217234_s_at, 208621_s_at,<br>217230_at, 208623_s_at                                                                                                 | villin 2 (ezrin)                                              |
| 1555594_a_at, 201151_s_at,<br>241681_at, 238558_at,<br>236558_at, 235811_at,<br>233015_at, 215663_at,<br>201153_s_at, 201152_s_at,<br>1558111_at, 1556657_at,<br>1556658_a_at | muscleblind-like (drosophila)                                 |
| 202393_s_at, 244447_at                                                                                                                                                        | kruppel-like factor 10                                        |
| 1554411_at, 223679_at,<br>242558_at, 201533_at                                                                                                                                | catenin (cadherin-associated protein), beta 1, 88kda          |
| 214487_s_at                                                                                                                                                                   | rap2a, member of ras oncogene family                          |
| 213844_at                                                                                                                                                                     | homeobox a5                                                   |
| 203463_s_at, 203464_s_at,<br>241239_at                                                                                                                                        | epsin 2                                                       |
| 209277_at, 209278_s_at                                                                                                                                                        | tissue factor pathway inhibitor 2                             |
| 208690_s_at                                                                                                                                                                   | pdz and lim domain 1 (elfin)                                  |
| 207391_s_at, 210256_s_at,<br>211205_x_at, 235646_at                                                                                                                           | phosphatidylinositol-4-phosphate 5-kinase, type i, alpha      |
| 226810_at, 238469_at, 220324_at                                                                                                                                               | chromosome 6 open reading frame 155                           |
| 201645_at, 243540_at                                                                                                                                                          | tenascin c (hexabrachion)                                     |
| 217802_s_at, 222027_at,<br>222424_s_at, 229353_s_at                                                                                                                           | nuclear casein kinase and cyclin-dependent kinase substrate 1 |
| 223707_at                                                                                                                                                                     | hypothetical protein mgc10850                                 |
| 1559228_at, 208792_s_at,<br>222043_at, 208791_at                                                                                                                              | clusterin                                                     |
| 202442_at, 217698_at                                                                                                                                                          | adaptor-related protein complex 3, sigma 1 subunit            |
| 203491_s_at, 209862_s_at,<br>203494_s_at, 203492_x_at,<br>203493_s_at                                                                                                         | centrosomal protein 57kda                                     |
| 203814_s_at                                                                                                                                                                   | nad(p)h dehydrogenase, quinone 2                              |
| 219936_s_at                                                                                                                                                                   | g protein-coupled receptor 87                                 |
| 201772_at, 240231_at,<br>212461_at, 213747_at                                                                                                                                 | antizyme inhibitor 1                                          |
| 209572_s_at, 210656_at                                                                                                                                                        | embryonic ectoderm development                                |

|                                                                                       |                                                                      |                                                                                                                          |
|---------------------------------------------------------------------------------------|----------------------------------------------------------------------|--------------------------------------------------------------------------------------------------------------------------|
| 219978_s_at,<br>218039_at                                                             | 1562163_at,                                                          | nucleolar and spindle associated protein 1                                                                               |
| 223428_s_at,<br>223429_x_at                                                           | 223831_x_at,                                                         | kiaa1160 protein                                                                                                         |
| 1561243_at                                                                            |                                                                      | transmembrane protein 105                                                                                                |
| 202431_s_at,<br>244089_at                                                             | 239931_at,                                                           | v-myc myelocytomatosis viral oncogene homolog (avian)                                                                    |
| 223158_s_at,<br>237761_at, 223561_at                                                  | 223159_s_at,                                                         | nima (never in mitosis gene a)-related kinase 6                                                                          |
| 202693_s_at,<br>202695_s_at                                                           | 202694_at,                                                           | serine/threonine kinase 17a (apoptosis-inducing)                                                                         |
| 203674_at                                                                             |                                                                      | helicase with zinc finger                                                                                                |
| 203747_at, 39248_at                                                                   |                                                                      | aquaporin 3 (gill blood group)                                                                                           |
| 205387_s_at                                                                           |                                                                      | chorionic gonadotropin, beta polypeptide                                                                                 |
| 233827_s_at, 217815_at                                                                |                                                                      | suppressor of ty 16 homolog (s. cerevisiae)                                                                              |
| 1559289_at                                                                            |                                                                      | transcriptional adaptor 1 (hfi1 homolog, yeast)-like                                                                     |
| 218622_at                                                                             |                                                                      | nucleoporin 37kda                                                                                                        |
| 200638_s_at,<br>200641_s_at, 200639_s_at                                              | 200640_at,                                                           | tyrosine 3-monooxygenase/tryptophan 5-monooxygenase activation protein, zeta polypeptide                                 |
| 1566934_at, 1566935_at                                                                |                                                                      | tyro3p protein tyrosine kinase pseudogene                                                                                |
| 202918_s_at,<br>243845_at                                                             | 202919_at,                                                           | preimplantation protein 3                                                                                                |
| 244766_at                                                                             |                                                                      | kiaa0220-like protein                                                                                                    |
| 1558971_at, 1558972_s_at                                                              |                                                                      | chromosome 6 open reading frame 207                                                                                      |
| 208872_s_at,<br>208873_s_at, 233081_at                                                | 244031_at,                                                           | receptor accessory protein 5                                                                                             |
| 1559249_at,<br>1563023_at,<br>203232_s_at,<br>242230_at,<br>236802_at,<br>203231_s_at | 1565803_at,<br>1565804_at,<br>236404_at,<br>243860_at,<br>230507_at, | ataxin 1                                                                                                                 |
| 207563_s_at,<br>229787_s_at, 212307_s_at                                              | 209240_at,                                                           | o-linked n-acetylglucosamine (glcnac) transferase (udp-n-acetylglucosamine:polypeptide-n-acetylglucosaminyl transferase) |
| 209093_s_at, 210589_s_at                                                              |                                                                      | glucosidase, beta; acid, pseudogene                                                                                      |
| 238107_at                                                                             |                                                                      | cdna flj43318 fis, clone nt2ri2018311                                                                                    |
| 1558534_at,<br>231500_s_at                                                            | 244766_at,                                                           | hypothetical gene loc283846                                                                                              |
| 212056_at, 212057_at, 232988_at                                                       |                                                                      | kiaa0182                                                                                                                 |
| 218198_at                                                                             |                                                                      | hypothetical protein flj10694                                                                                            |

|                                               |                                                                                                                                                                                                                                                                                            |
|-----------------------------------------------|--------------------------------------------------------------------------------------------------------------------------------------------------------------------------------------------------------------------------------------------------------------------------------------------|
| 1553212_at, 1553213_a_at                      | keratin 5b                                                                                                                                                                                                                                                                                 |
| 209674_at                                     | cryptochrome 1 (photolyase-like)                                                                                                                                                                                                                                                           |
| 223276_at                                     | mstp150                                                                                                                                                                                                                                                                                    |
| 232480_at                                     | flj27365 protein                                                                                                                                                                                                                                                                           |
| 235356_at, 236185_at                          | hypothetical protein flj20147                                                                                                                                                                                                                                                              |
| 235693_at                                     | ,consensus includes gb:d81004 /fea=est /db_xref=gi:1178881 /db_xref=est:hum123c07a /clone=gen-123c07 /ug=hs.183526 ests,gb:d81004 /db_xref=gi:1178881 /db_xref=hum123c07a /clone=gen-123c07 /fea=est /cnt=16 /tid=hs.183526.0 /tier=consend /stk=5 /ug=hs.183526 /ug_title=ests            |
| 202012_s_at, 202013_s_at                      | exostoses (multiple) 2                                                                                                                                                                                                                                                                     |
| 218907_s_at                                   | leucine rich repeat containing 61                                                                                                                                                                                                                                                          |
| 202023_at                                     | ephrin-a1                                                                                                                                                                                                                                                                                  |
| 235771_at                                     | ,consensus includes gb:bf594722 /fea=est /db_xref=gi:11687046 /db_xref=est:7o54e09.x1 /clone=image:3577841 /ug=hs.122147 ests,gb:bf594722 /db_xref=gi:11687046 /db_xref=7o54e09.x1 /clone=image:3577841 /fea=est /cnt=9 /tid=hs.122147.0 /tier=consend /stk=6 /ug=hs.122147 /ug_title=ests |
| 1564796_at, 201325_s_at, 213895_at, 201324_at | epithelial membrane protein 1                                                                                                                                                                                                                                                              |
| 218995_s_at                                   | endothelin 1                                                                                                                                                                                                                                                                               |
| 224484_s_at, 226580_at                        | breast cancer metastasis-suppressor 1-like                                                                                                                                                                                                                                                 |
| 207540_s_at, 226068_at, 244023_at             | spleen tyrosine kinase                                                                                                                                                                                                                                                                     |
| 214797_s_at                                   | pctaire protein kinase 3                                                                                                                                                                                                                                                                   |
| 1566105_at, 201155_s_at, 216205_s_at          | mitofusin 2                                                                                                                                                                                                                                                                                |
| 202820_at                                     | aryl hydrocarbon receptor                                                                                                                                                                                                                                                                  |
| 223474_at                                     | chromosome 14 open reading frame 4                                                                                                                                                                                                                                                         |
| 203887_s_at, 203888_at, 237252_at             | thrombomodulin                                                                                                                                                                                                                                                                             |
| 221389_at                                     | phospholipase a2, group iie                                                                                                                                                                                                                                                                |
| 225076_s_at                                   | zinc finger, nfx1-type containing 1                                                                                                                                                                                                                                                        |
| 219037_at                                     | cgi-115 protein                                                                                                                                                                                                                                                                            |
| 218810_at                                     | zinc finger ccch-type containing 12a                                                                                                                                                                                                                                                       |
| 218734_at, 222369_at                          | hypothetical protein flj13848                                                                                                                                                                                                                                                              |
| 244854_at                                     | leupaxin                                                                                                                                                                                                                                                                                   |
| 201482_at, 226706_at                          | quiescin q6                                                                                                                                                                                                                                                                                |
| 223029_s_at, 223031_s_at, 223030_at           | tnf receptor-associated factor 7                                                                                                                                                                                                                                                           |
| 221509_at, 234347_s_at                        | density-regulated protein                                                                                                                                                                                                                                                                  |

|                                                                                               |                                                                                   |
|-----------------------------------------------------------------------------------------------|-----------------------------------------------------------------------------------|
| 238982_at, 239969_at,<br>234915_s_at, 231896_s_at                                             |                                                                                   |
| 206167_s_at, 208085_s_at                                                                      | rho gtpase activating protein 6                                                   |
| 224808_s_at, 227588_s_at,<br>223811_s_at, 224816_at                                           | chromosome 7 open reading frame 20                                                |
| 207856_s_at                                                                                   | hypothetical protein flj20297                                                     |
| 209372_x_at, 214023_x_at                                                                      | tubulin, beta 2b                                                                  |
| 218428_s_at, 222629_at,<br>243592_at, 232236_at,<br>222628_s_at                               | rev1-like (yeast)                                                                 |
| 1562937_at, 201579_at                                                                         | fat tumor suppressor homolog 1 (drosophila)                                       |
| 218224_at                                                                                     | paraneoplastic antigen ma1                                                        |
| 214345_at, 233668_at,<br>233875_at, 225275_at,<br>207379_at, 1558643_s_at                     | egf-like repeats and discoidin i-like domains 3                                   |
| 235419_at                                                                                     | erbb receptor feedback inhibitor 1                                                |
| 1557512_at, 210716_s_at,<br>240444_x_at, 236747_at,<br>201975_at, 1558924_s_at,<br>1568012_at | restin (reed-steinberg cell-expressed intermediate filament-associated protein)   |
| 205249_at                                                                                     | early growth response 2 (krox-20 homolog, drosophila)                             |
| 1562749_at                                                                                    | hypothetical protein loc644090                                                    |
| 230557_at, 237666_at                                                                          | x-ray radiation resistance associated 1                                           |
| 232710_at                                                                                     | hypothetical gene supported by ak024602                                           |
| 203234_at                                                                                     | uridine phosphorylase 1                                                           |
| 214850_at                                                                                     | hypothetical protein loc153561                                                    |
| 222749_at, 224202_at,<br>224203_at, 224201_s_at                                               | suppressor of fused homolog (drosophila)                                          |
| 228073_at                                                                                     | n-acetylneuraminic acid phosphatase                                               |
| 200773_x_at                                                                                   | hypothetical gene supported by bc013859                                           |
| 202002_at, 202003_s_at                                                                        | acetyl-coenzyme a acyltransferase 2 (mitochondrial 3-oxoacyl-coenzyme a thiolase) |
| 205212_s_at, 205213_at,<br>242081_at                                                          | centaurin, beta 1                                                                 |
| 213039_at                                                                                     | rho/rac guanine nucleotide exchange factor (gef) 18                               |
| 1552714_at                                                                                    | cellular repressor of e1a-stimulated genes 2                                      |
| 202680_at                                                                                     | general transcription factor iie, polypeptide 2, beta 34kda                       |
| 228153_at, 239012_at,<br>235549_at, 239704_at,<br>244781_x_at                                 | ibr domain containing 2                                                           |
| 205690_s_at                                                                                   | g10 protein                                                                       |

|                                                                                                                   |                                                                                                      |
|-------------------------------------------------------------------------------------------------------------------|------------------------------------------------------------------------------------------------------|
| 201971_s_at, 201972_at                                                                                            | atpase, h+ transporting, lysosomal 70kda, v1 subunit a                                               |
| 224578_at, 243297_at                                                                                              | regulator of chromosome condensation 2                                                               |
| 1553778_at                                                                                                        | williams beuren syndrome chromosome region 27                                                        |
| 218849_s_at                                                                                                       | protein phosphatase 1, regulatory (inhibitor) subunit 13 like                                        |
| 1559142_at, 202423_at, 242480_at, 221715_at                                                                       | myst histone acetyltransferase (monocytic leukemia) 3                                                |
| 219058_x_at                                                                                                       | tubulointerstitial nephritis antigen-like 1                                                          |
| 1553843_at, 1553844_a_at, 1553845_x_at                                                                            | chromosome 10 open reading frame 67                                                                  |
| 204532_x_at, 207126_x_at, 215125_s_at, 208596_s_at                                                                | udp glucuronosyltransferase 1 family, polypeptide a3                                                 |
| 214716_at, 219546_at, 226853_at, 241205_at, 59644_at, 37170_at, 232688_at                                         | bmp2 inducible kinase                                                                                |
| 1565669_at                                                                                                        | hypothetical gene supported by bc006468                                                              |
| 209711_at, 209712_at, 209713_s_at                                                                                 | solute carrier family 35 (udp-glucuronic acid/udp-n-acetylgalactosamine dual transporter), member d1 |
| 1556116_s_at, 209225_x_at, 212635_at, 225766_s_at, 225765_at, 221829_s_at, 209226_s_at, 207657_x_at, 1557278_s_at | transportin 1                                                                                        |
| 203393_at, 203395_s_at, 203394_s_at                                                                               | hairy and enhancer of split 1, (drosophila)                                                          |
| 228870_at, 225864_at, 230817_at                                                                                   | family with sequence similarity 84, member b                                                         |
| 207602_at                                                                                                         | transmembrane protease, serine 11d                                                                   |
| 206317_s_at                                                                                                       | atp-binding cassette, sub-family b (mdr/tap), member 8                                               |
| 220015_at, 233863_at                                                                                              | castor homolog 1, zinc finger (drosophila)                                                           |
| 204312_x_at, 204314_s_at, 214513_s_at, 204313_s_at, 243625_at                                                     | camp responsive element binding protein 1                                                            |
| 237807_at                                                                                                         | spermatogenesis associated 12                                                                        |
| 201289_at, 210764_s_at                                                                                            | cysteine-rich, angiogenic inducer, 61                                                                |
| 219856_at, 228865_at                                                                                              | hypothetical protein mgc2742                                                                         |
| 228606_at                                                                                                         | hypothetical protein mgc33212                                                                        |
| 225005_at                                                                                                         | phd finger protein 13                                                                                |
| 1553082_at                                                                                                        | crystallin, gamma n                                                                                  |
| 214693_x_at                                                                                                       | hypothetical loc401967                                                                               |
| 207886_s_at, 207887_s_at                                                                                          | calcitonin receptor                                                                                  |
| 209193_at                                                                                                         | pim-1 oncogene                                                                                       |
| 224792_at                                                                                                         | tankyrase 1 binding protein 1, 182kda                                                                |

|                                                                      |                                              |                                                                                                                                                                                                                                                     |
|----------------------------------------------------------------------|----------------------------------------------|-----------------------------------------------------------------------------------------------------------------------------------------------------------------------------------------------------------------------------------------------------|
| 1558523_at,<br>230841_at                                             | 220150_s_at,                                 | chromosome 6 open reading frame 60                                                                                                                                                                                                                  |
| 235174_s_at                                                          |                                              | ,consensus includes gb:aw952781 /fea=est /db_xref=gi:8142464<br>/db_xref=est:est364851 /ug=hs.31209 ests,gb:aw952781<br>/db_xref=gi:8142464 /db_xref=est364851 /fea=est /cnt=16<br>/tid=hs.31209.0 /tier=consend /stk=0 /ug=hs.31209 /ug_title=ests |
| 237998_at                                                            |                                              | dnaj (hsp40) homolog, subfamily c, member 9                                                                                                                                                                                                         |
| 226961_at                                                            |                                              | hypothetical protein loc222171                                                                                                                                                                                                                      |
| 226530_at                                                            |                                              | bcl2 modifying factor                                                                                                                                                                                                                               |
| 1560458_s_at, 224370_s_at                                            |                                              | calcyphosine 2                                                                                                                                                                                                                                      |
| 209566_at                                                            |                                              | insulin induced gene 2                                                                                                                                                                                                                              |
| 1568609_s_at                                                         |                                              | family with sequence similarity 91, member a2                                                                                                                                                                                                       |
| 218138_at, 222530_s_at                                               |                                              | mckusick-kaufman syndrome                                                                                                                                                                                                                           |
| 224724_at                                                            |                                              | sulfatase 2                                                                                                                                                                                                                                         |
| 203220_s_at,<br>215802_at,<br>227130_s_at, 203222_s_at               | 203221_at,<br>228284_at,                     | transducin-like enhancer of split 1 (e(sp1) homolog, drosophila)                                                                                                                                                                                    |
| 218016_s_at,<br>233458_at, 222490_at                                 | 233459_at,                                   | polymerase (rna) iii (dna directed) polypeptide e (80kd)                                                                                                                                                                                            |
| 1552919_at, 238767_at                                                |                                              | hypothetical protein mgc26744                                                                                                                                                                                                                       |
| 1564010_at,<br>209701_at                                             | 212580_at,                                   | type 1 tumor necrosis factor receptor shedding aminopeptidase<br>regulator                                                                                                                                                                          |
| 202613_at                                                            |                                              | ctp synthase                                                                                                                                                                                                                                        |
| 1552482_at,<br>225188_at,<br>243012_at, 225189_s_at                  | 225186_at,<br>231075_x_at,                   | ras association (ralgds/af-6) and pleckstrin homology domains 1                                                                                                                                                                                     |
| 203074_at                                                            |                                              | annexin a8                                                                                                                                                                                                                                          |
| 232024_at                                                            |                                              | gtpase, imap family member 2                                                                                                                                                                                                                        |
| 205717_x_at,<br>214564_s_at,<br>231754_at,<br>214563_at, 209079_x_at | 211066_x_at,<br>231753_s_at,<br>215836_s_at, | protocadherin gamma subfamily c, 3                                                                                                                                                                                                                  |
| 226804_at,<br>242945_at, 243221_at                                   | 241981_at,                                   | family with sequence similarity 20, member a                                                                                                                                                                                                        |
| 206239_s_at                                                          |                                              | serine peptidase inhibitor, kazal type 1                                                                                                                                                                                                            |
| 238696_at                                                            |                                              | heterogeneous nuclear ribonucleoprotein a1-like                                                                                                                                                                                                     |
| 1560917_at,<br>224160_s_at                                           | 239976_at,                                   | acyl-coenzyme a dehydrogenase family, member 9                                                                                                                                                                                                      |
| 205717_x_at,<br>211066_x_at,<br>211807_x_at                          | 209079_x_at,<br>215836_s_at,                 | protocadherin gamma subfamily b, 5                                                                                                                                                                                                                  |

|                                                     |                              |                                                                                                                                                                                                                                                                                                                                                                             |
|-----------------------------------------------------|------------------------------|-----------------------------------------------------------------------------------------------------------------------------------------------------------------------------------------------------------------------------------------------------------------------------------------------------------------------------------------------------------------------------|
| 1556049_at,<br>214629_x_at,<br>239251_at, 243031_at | 211509_s_at,<br>210968_s_at, | reticulon 4                                                                                                                                                                                                                                                                                                                                                                 |
| 212134_at,<br>216019_x_at                           | 216102_at,                   | pleckstrin homology-like domain, family b, member 1                                                                                                                                                                                                                                                                                                                         |
| 227799_at, 244654_at                                |                              | myosin ig                                                                                                                                                                                                                                                                                                                                                                   |
| 230859_at                                           |                              | internexin neuronal intermediate filament protein, alpha                                                                                                                                                                                                                                                                                                                    |
| 1563466_at,<br>1568770_at,<br>202555_s_at           | 230460_at,<br>224823_at,     | myosin, light polypeptide kinase                                                                                                                                                                                                                                                                                                                                            |
| 204636_at                                           |                              | collagen, type xvii, alpha 1                                                                                                                                                                                                                                                                                                                                                |
| 211444_at                                           |                              | smt3 suppressor of mif two 3 homolog 2 (yeast)                                                                                                                                                                                                                                                                                                                              |
| 204373_s_at,<br>213956_at, 213957_s_at              | 213165_at,                   | centrosomal protein 350kda                                                                                                                                                                                                                                                                                                                                                  |
| 244766_at                                           |                              | slc7a5 pseudogene                                                                                                                                                                                                                                                                                                                                                           |
| 227717_at, 241380_at                                |                              | flj41603 protein                                                                                                                                                                                                                                                                                                                                                            |
| 211296_x_at                                         |                              | ubiquitin c                                                                                                                                                                                                                                                                                                                                                                 |
| 231748_at                                           |                              | ul16 binding protein 3                                                                                                                                                                                                                                                                                                                                                      |
| 200924_s_at                                         |                              | solute carrier family 3 (activators of dibasic and neutral amino acid transport), member 2                                                                                                                                                                                                                                                                                  |
| 210710_at,<br>222661_at                             | 218534_s_at,                 | fetal hypothetical protein                                                                                                                                                                                                                                                                                                                                                  |
| 207708_at, 222383_s_at                              |                              | arachidonate lipxygenase 3                                                                                                                                                                                                                                                                                                                                                  |
| 229362_at                                           |                              | similar to ribosomal protein s12                                                                                                                                                                                                                                                                                                                                            |
| 206637_at                                           |                              | purinergic receptor p2y, g-protein coupled, 14                                                                                                                                                                                                                                                                                                                              |
| 234160_at                                           |                              | ,consensus includes gb:ak025324.1 /def=homo sapiens cdna: flj21671 fis, clone col09015. /fea=mrna /db_xref=gi:10437817 /ug=hs.306800 homo sapiens cdna: flj21671 fis,gb:ak025324.1 /db_xref=gi:10437817 /fea=mrna /cnt=2 /tid=hs.306800.0 /tier=consend /stk=0 /ug=hs.306800 /ug_title=homo sapiens cdna: flj21671 fis, clone col09015 /def=homo sapiens cdna: flj21671 fis |
| 1556321_a_at                                        |                              | ,gb:bq184262 /db_xref=gi:20359813 /db_xref=ui-e-ej1-ajs-k-02-0-ui.s1 /clone=ui-e-ej1-ajs-k-02-0-ui /tid=hs2.47578.1 /cnt=11 /fea=mrna /tier=consend /stk=3 /ug=hs.47578 /ug_title=homo sapiens mrna full length insert cdna clone euroimage 283668.                                                                                                                         |
| 208194_s_at,<br>209649_at                           | 215044_s_at,                 | signal transducing adaptor molecule (sh3 domain and itam motif) 2                                                                                                                                                                                                                                                                                                           |
| 205520_at, 240969_at                                |                              | striatin, calmodulin binding protein                                                                                                                                                                                                                                                                                                                                        |
| 226245_at,<br>229183_at,<br>239834_at, 235092_at    | 226246_at,<br>236057_at,     | potassium channel tetramerisation domain containing 1                                                                                                                                                                                                                                                                                                                       |



|                                                                               |                                                                                                                                                                                      |
|-------------------------------------------------------------------------------|--------------------------------------------------------------------------------------------------------------------------------------------------------------------------------------|
| 209653_at, 225267_at, 225268_at                                               | karyopherin alpha 4 (importin alpha 3)                                                                                                                                               |
| 227804_at                                                                     | tlc domain containing 1                                                                                                                                                              |
| 218349_s_at, 222606_at                                                        | zwilch, kinetochore associated, homolog (drosophila)                                                                                                                                 |
| 204268_at                                                                     | s100 calcium binding protein a2                                                                                                                                                      |
| 1556158_at                                                                    | hypothetical protein dkfzp666g057                                                                                                                                                    |
| 202267_at, 207517_at                                                          | laminin, gamma 2                                                                                                                                                                     |
| 210095_s_at, 212143_s_at                                                      | insulin-like growth factor binding protein 3                                                                                                                                         |
| 218317_x_at, 233334_x_at                                                      | giy-yig domain containing 2                                                                                                                                                          |
| 208208_at                                                                     | myosin, heavy polypeptide 13, skeletal muscle                                                                                                                                        |
| 209313_at                                                                     | xpa binding protein 1, gtpase                                                                                                                                                        |
| 242988_at                                                                     | dc-stamp domain containing 2                                                                                                                                                         |
| 1553323_a_at, 217588_at, 1561155_at                                           | cation channel, sperm associated 2                                                                                                                                                   |
| 207639_at                                                                     | frizzled homolog 9 (drosophila)                                                                                                                                                      |
| 218412_s_at, 237947_at                                                        | gtf2i repeat domain containing 1                                                                                                                                                     |
| 225060_at, 1561180_at                                                         | low density lipoprotein receptor-related protein 11                                                                                                                                  |
| 1556970_at                                                                    | .gb:bc029589.1 /db_xref=gi:23271960 /tid=hs2.276855.1 /cnt=3 /fea=mrna /tier=consend /stk=2 /ug=hs.276855 /ug_title=homo sapiens, clone image:5272053, mrna /def=homo sapiens, mrna. |
| 1556971_a_at                                                                  | .gb:bc029589.1 /db_xref=gi:23271960 /tid=hs2.276855.1 /cnt=3 /fea=mrna /tier=consend /stk=2 /ug=hs.276855 /ug_title=homo sapiens, clone image:5272053, mrna /def=homo sapiens, mrna. |
| 206521_s_at                                                                   | general transcription factor iia, 1, 19/37kda                                                                                                                                        |
| 202487_s_at, 212205_at, 227085_at, 212206_s_at                                | h2a histone family, member v                                                                                                                                                         |
| 1553764_a_at, 225807_at, 243446_at, 225806_at                                 | jub, ajuba homolog (xenopus laevis)                                                                                                                                                  |
| 217730_at                                                                     | transmembrane bax inhibitor motif containing 1                                                                                                                                       |
| 208934_s_at, 210732_s_at, 234611_at, 208936_x_at                              | lectin, galactoside-binding, soluble, 8 (galectin 8)                                                                                                                                 |
| 207290_at, 232474_at, 234642_at, 243890_at, 234636_at, 222159_at, 213030_s_at | plexin a2                                                                                                                                                                            |
| 231335_at                                                                     | membrane-spanning 4-domains, subfamily a, member 6e                                                                                                                                  |
| 1555392_at, 202720_at, 244870_at, 202719_s_at                                 | testis derived transcript (3 lim domains)                                                                                                                                            |
| 1553036_at                                                                    | g protein-coupled receptor 111                                                                                                                                                       |
| 223098_s_at, 223099_s_at, 243333_at, 229663_at                                | peroxisomal lon protease like                                                                                                                                                        |
| 206371_at                                                                     | folate receptor 3 (gamma)                                                                                                                                                            |

|                                                                                          |                                                                                                                                                                                                                                         |
|------------------------------------------------------------------------------------------|-----------------------------------------------------------------------------------------------------------------------------------------------------------------------------------------------------------------------------------------|
| 1556735_at                                                                               | ,gb:ai939544 /db_xref=gi:5678333 /db_xref=qy62d05.x5<br>/clone=image:2016585 /tid=hs2.158563.1 /cnt=6 /fea=mrna<br>/tier=consend /stk=2 /ug=hs.158563 /ug_title=homo sapiens cdna<br>flj37075 fis, clone brace2015756.                  |
| 1555186_at, 202284_s_at                                                                  | cyclin-dependent kinase inhibitor 1a (p21, cip1)                                                                                                                                                                                        |
| 223264_at                                                                                | mesoderm development candidate 1                                                                                                                                                                                                        |
| 201415_at                                                                                | glutathione synthetase                                                                                                                                                                                                                  |
| 204141_at, 209372_x_at                                                                   | tubulin, beta 2a                                                                                                                                                                                                                        |
| 233014_at                                                                                | wd repeat domain 37                                                                                                                                                                                                                     |
| 1555841_at                                                                               | transmembrane protein with egf-like and two follistatin-like domains 1                                                                                                                                                                  |
| 234029_at                                                                                | protocadherin gamma subfamily b, 8 pseudogene                                                                                                                                                                                           |
| 208907_s_at, 217408_at                                                                   | mitochondrial ribosomal protein s18b                                                                                                                                                                                                    |
| 231461_at                                                                                | keratin 6 irs                                                                                                                                                                                                                           |
| 1556622_s_at                                                                             | ,gb:af085894.1 /db_xref=gi:3483229 /tid=hs2.407367.1 /cnt=6<br>/fea=mrna /tier=consend /stk=2 /ug=hs.407367 /ug_title=homo<br>sapiens full length insert cdna clone yp97d11 /def=homo sapiens full<br>length insert cdna clone yp97d11. |
| 204780_s_at, 215719_x_at,<br>204781_s_at, 216252_x_at,<br>237522_at                      | fas (tnf receptor superfamily, member 6)                                                                                                                                                                                                |
| 209675_s_at                                                                              | heterogeneous nuclear ribonucleoprotein u-like 1                                                                                                                                                                                        |
| 208678_at                                                                                | atpase, h+ transporting, lysosomal 31kda, v1 subunit e1                                                                                                                                                                                 |
| 221556_at, 234605_at,<br>234740_at, 230887_at,<br>221555_x_at, 211348_s_at,<br>211347_at | cdc14 cell division cycle 14 homolog b (s. cerevisiae)                                                                                                                                                                                  |
| 1554834_a_at, 223322_at                                                                  | ras association (ralgds/af-6) domain family 5                                                                                                                                                                                           |
| 222996_s_at, 233955_x_at,<br>236516_at, 224516_s_at                                      | cxxc finger 5                                                                                                                                                                                                                           |
| 1558273_a_at, 211432_s_at,<br>211431_s_at                                                | tyro3 protein tyrosine kinase                                                                                                                                                                                                           |
| 203301_s_at                                                                              | cyclin d binding myb-like transcription factor 1                                                                                                                                                                                        |
| 211362_s_at, 217272_s_at,<br>211361_s_at, 216258_s_at                                    | serpin peptidase inhibitor, clade b (ovalbumin), member 13                                                                                                                                                                              |
| 1557389_at                                                                               | ,gb:ak056784.1 /db_xref=gi:16552287 /tid=hs2.224056.1 /cnt=6<br>/fea=mrna /tier=consend /stk=1 /ug=hs.224056 /ug_title=homo<br>sapiens cdna flj32222 fis, clone place6004101. /def=homo sapiens<br>cdna flj32222 fis                    |
| 205408_at, 216480_x_at,<br>216506_x_at, 225992_at,<br>238257_at, 243003_at,              | myeloid/lymphoid or mixed-lineage leukemia (trithorax homolog,<br>drosophila); translocated to, 10                                                                                                                                      |

|                                                                     |                                          |                                                                                                                                                                                                                                                                                                                                                                               |
|---------------------------------------------------------------------|------------------------------------------|-------------------------------------------------------------------------------------------------------------------------------------------------------------------------------------------------------------------------------------------------------------------------------------------------------------------------------------------------------------------------------|
| 230122_at,<br>216503_s_at                                           | 216509_x_at,                             |                                                                                                                                                                                                                                                                                                                                                                               |
| 1562413_at                                                          |                                          | chromosome 11 open reading frame 37                                                                                                                                                                                                                                                                                                                                           |
| 208371_s_at                                                         |                                          | ring finger protein 1                                                                                                                                                                                                                                                                                                                                                         |
| 236027_at                                                           |                                          | chromosome 10 open reading frame 78                                                                                                                                                                                                                                                                                                                                           |
| 209386_at,<br>215033_at                                             | 215034_s_at,                             | transmembrane 4 I six family member 1                                                                                                                                                                                                                                                                                                                                         |
| 1557295_a_at,<br>202552_s_at                                        | 228496_s_at,                             | cysteine rich transmembrane bmp regulator 1 (chordin-like)                                                                                                                                                                                                                                                                                                                    |
| 219838_at, 232734_at, 240716_at                                     |                                          | tetratricopeptide repeat domain 23                                                                                                                                                                                                                                                                                                                                            |
| 233485_at                                                           |                                          | ,consensus includes gb:ak001128.1 /def=homo sapiens cdna flj10266 fis, clone hembb1001024. /fea=mrna /db_xref=gi:7022194 /ug=hs.210297 homo sapiens cdna flj10266 fis,gb:ak001128.1 /db_xref=gi:7022194 /fea=mrna /cnt=3 /tid=hs.210297.0 /tier=consend /stk=0 /ug=hs.210297 /ug_title=homo sapiens cdna flj10266 fis, clone hembb1001024 /def=homo sapiens cdna flj10266 fis |
| 229456_s_at,<br>1559780_at                                          | 1553565_s_at,                            | dimethylarginine dimethylaminohydrolase 1                                                                                                                                                                                                                                                                                                                                     |
| 1569477_at,<br>210655_s_at,<br>242320_at,<br>233629_at, 204132_s_at | 204131_s_at,<br>233674_at,<br>239923_at, | forkhead box o3a                                                                                                                                                                                                                                                                                                                                                              |
| 221659_s_at, 221660_at                                              |                                          | myosin light chain 2, precursor lymphocyte-specific                                                                                                                                                                                                                                                                                                                           |
| 1554610_at,<br>210486_at, 220280_s_at                               | 231191_at,                               | ankyrin repeat and mynd domain containing 1                                                                                                                                                                                                                                                                                                                                   |
| 219321_at,<br>226092_at, 241020_at, 242779_at                       | 235864_at,                               | membrane protein, palmitoylated 5 (maguk p55 subfamily member 5)                                                                                                                                                                                                                                                                                                              |
| 233428_at                                                           |                                          | ,consensus includes gb:ak025797.1 /def=homo sapiens cdna: flj22144 fis, clone hep21732. /fea=mrna /db_xref=gi:10438418 /ug=hs.288746 homo sapiens cdna: flj22144 fis,gb:ak025797.1 /db_xref=gi:10438418 /fea=mrna /cnt=3 /tid=hs.288746.0 /tier=consend /stk=0 /ug=hs.288746 /ug_title=homo sapiens cdna: flj22144 fis, clone hep21732 /def=homo sapiens cdna: flj22144 fis   |
| 212823_s_at, 217044_s_at                                            |                                          | spectrin, beta, erythrocytic (includes spherocytosis, clinical type i)                                                                                                                                                                                                                                                                                                        |
| 205286_at, 205287_s_at                                              |                                          | transcription factor ap-2 gamma (activating enhancer binding protein 2 gamma)                                                                                                                                                                                                                                                                                                 |
| 219069_at                                                           |                                          | ankyrin repeat domain 49                                                                                                                                                                                                                                                                                                                                                      |
| 225907_at,<br>225909_at, 235499_at, 241416_at                       | 230517_at,                               | hypothetical protein loc155036                                                                                                                                                                                                                                                                                                                                                |
| 222890_at                                                           |                                          | hspc065 protein                                                                                                                                                                                                                                                                                                                                                               |
| 202315_s_at, 226602_s_at                                            |                                          | breakpoint cluster region                                                                                                                                                                                                                                                                                                                                                     |

|                                                                                     |                                                                                                                                                                                                                                                                                                                                                               |
|-------------------------------------------------------------------------------------|---------------------------------------------------------------------------------------------------------------------------------------------------------------------------------------------------------------------------------------------------------------------------------------------------------------------------------------------------------------|
| 218421_at                                                                           | ceramide kinase                                                                                                                                                                                                                                                                                                                                               |
| 1555123_at, 228821_at                                                               | st6 beta-galactosamide alpha-2,6-sialyltransferase 2                                                                                                                                                                                                                                                                                                          |
| 214599_at                                                                           | involucrin                                                                                                                                                                                                                                                                                                                                                    |
| 235569_at                                                                           | vacuolar protein sorting 37d (yeast)                                                                                                                                                                                                                                                                                                                          |
| 203455_s_at, 210593_at,<br>230333_at, 213988_s_at,<br>210592_s_at                   | spermidine/spermine n1-acetyltransferase                                                                                                                                                                                                                                                                                                                      |
| 204691_x_at, 237726_at,<br>210647_x_at, 215938_s_at                                 | phospholipase a2, group vi (cytosolic, calcium-independent)                                                                                                                                                                                                                                                                                                   |
| 208005_at                                                                           | netrin 1                                                                                                                                                                                                                                                                                                                                                      |
| 226516_at                                                                           | hypothetical protein pp3501                                                                                                                                                                                                                                                                                                                                   |
| 218805_at                                                                           | gtpase, imap family member 5                                                                                                                                                                                                                                                                                                                                  |
| 228256_s_at                                                                         | tiga1                                                                                                                                                                                                                                                                                                                                                         |
| 227586_at, 230414_s_at,<br>228505_s_at                                              | loc124491                                                                                                                                                                                                                                                                                                                                                     |
| 233698_at                                                                           | ,consensus includes gb:aa772874 /fea=est /db_xref=gi:2825716 /db_xref=est:ab70c08.r1 /clone=image:852302 /ug=hs.306800 homo sapiens cdna: flj21671 fis, clone col09015,gb:aa772874 /db_xref=gi:2825716 /db_xref=ab70c08.r1 /clone=image:852302 /fea=mrna /cnt=2 /tid=hs.306800.0 /tier=consend /stk=0 /ug=hs.306800 /ug_title=homo sapiens cdna: flj21671 fis |
| 208054_at, 208055_s_at,<br>225989_at, 233509_at,<br>237114_at, 232026_at, 225988_at | hect domain and rld 4                                                                                                                                                                                                                                                                                                                                         |
| 233612_at                                                                           | ,consensus includes gb:au148260 /fea=est /db_xref=gi:11009781 /db_xref=est:au148260 /clone=mamma1003049 /ug=hs.296723 homo sapiens cdna flj12420 fis, clone mamma1003049,gb:au148260 /db_xref=gi:11009781 /db_xref=au148260 /clone=mamma1003049 /fea=mrna /cnt=3 /tid=hs.296723.0 /tier=consend /stk=1 /ug=hs.296723 /ug_title=homo sapiens cdna flj12420 fis |
| 1556983_a_at                                                                        | ,gb:af075116.1 /db_xref=gi:3377657 /tid=hs2.208511.1 /cnt=3 /fea=mrna /tier=consend /stk=2 /ug=hs.208511 /ug_title=homo sapiens full length insert cdna yw02f03 /def=homo sapiens full length insert cdna yw02f03.                                                                                                                                            |
| 1569439_at, 213012_at                                                               | neural precursor cell expressed, developmentally down-regulated 4                                                                                                                                                                                                                                                                                             |
| 1562238_at, 204190_at                                                               | ubiquitin specific peptidase like 1                                                                                                                                                                                                                                                                                                                           |
| 200770_s_at, 200771_at,<br>243591_at                                                | laminin, gamma 1 (formerly lamb2)                                                                                                                                                                                                                                                                                                                             |
| 221012_s_at, 223131_s_at,<br>223132_s_at, 228015_s_at                               | tripartite motif-containing 8                                                                                                                                                                                                                                                                                                                                 |
| 202996_at                                                                           | polymerase (dna-directed), delta 4                                                                                                                                                                                                                                                                                                                            |

|                                                                                                                                                                           |                                                                                                                                                                                                                                                                                                                                                                                 |
|---------------------------------------------------------------------------------------------------------------------------------------------------------------------------|---------------------------------------------------------------------------------------------------------------------------------------------------------------------------------------------------------------------------------------------------------------------------------------------------------------------------------------------------------------------------------|
| 233820_at                                                                                                                                                                 | ,consensus includes gb:ak026195.1 /def=homo sapiens cdna: flj22542 fis, clone hsi00196. /fea=mrna /db_xref=gi:10438966 /ug=hs.146747 homo sapiens cdna: flj22542 fis,gb:ak026195.1 /db_xref=gi:10438966 /fea=mrna /cnt=2 /tid=hs.146747.0 /tier=consend /stk=2 /ug=hs.146747 /ug_title=homo sapiens cdna: flj22542 fis, clone hsi00196 /def=homo sapiens cdna: flj22542 fis     |
| 210004_at, 242397_at                                                                                                                                                      | oxidised low density lipoprotein (lectin-like) receptor 1                                                                                                                                                                                                                                                                                                                       |
| 227569_at                                                                                                                                                                 | ligand of numb-protein x 2                                                                                                                                                                                                                                                                                                                                                      |
| 230062_at                                                                                                                                                                 | similar to peripheral-type benzodiazepine receptor-associated protein 1 (prax-1) (peripheral benzodiazepine receptor interacting protein) (pbr-ip) (rim binding protein 1) (rim-bp1)                                                                                                                                                                                            |
| 217649_at                                                                                                                                                                 | similar to zinc finger protein 216                                                                                                                                                                                                                                                                                                                                              |
| 204432_at, 228358_at                                                                                                                                                      | sry (sex determining region y)-box 12                                                                                                                                                                                                                                                                                                                                           |
| 1556818_at, 1557707_at,<br>1558822_at, 1566991_at,<br>1566990_x_at, 1566989_at,<br>225184_at, 238043_at,<br>240008_at, 244772_at,<br>240116_at, 239674_at,<br>233339_s_at | dan15 protein                                                                                                                                                                                                                                                                                                                                                                   |
| 216783_at, 242279_at, 228723_at                                                                                                                                           | hypothetical loc283677                                                                                                                                                                                                                                                                                                                                                          |
| 1559807_at, 242495_at                                                                                                                                                     | survival of motor neuron 1, telomeric                                                                                                                                                                                                                                                                                                                                           |
| 207856_s_at                                                                                                                                                               | flj41352 protein                                                                                                                                                                                                                                                                                                                                                                |
| 211987_at                                                                                                                                                                 | topoisomerase (dna) ii beta 180kda                                                                                                                                                                                                                                                                                                                                              |
| 208920_at, 208921_s_at                                                                                                                                                    | sorcin                                                                                                                                                                                                                                                                                                                                                                          |
| 207575_at                                                                                                                                                                 | golgin-like protein                                                                                                                                                                                                                                                                                                                                                             |
| 201931_at, 239830_at                                                                                                                                                      | electron-transfer-flavoprotein, alpha polypeptide (glutaric aciduria ii)                                                                                                                                                                                                                                                                                                        |
| 205933_at, 236317_at,<br>239544_at, 234081_at,<br>240925_at, 242901_at                                                                                                    | set binding protein 1                                                                                                                                                                                                                                                                                                                                                           |
| 213103_at, 233194_at, 233159_at                                                                                                                                           | start domain containing 13                                                                                                                                                                                                                                                                                                                                                      |
| 234067_at                                                                                                                                                                 | ,consensus includes gb:ak001076.1 /def=homo sapiens cdna flj10214 fis, clone hembra1006530. /fea=mrna /db_xref=gi:7022119 /ug=hs.296532 homo sapiens cdna flj10214 fis,gb:ak001076.1 /db_xref=gi:7022119 /fea=mrna /cnt=2 /tid=hs.296532.0 /tier=consend /stk=0 /ug=hs.296532 /ug_title=homo sapiens cdna flj10214 fis, clone hembra1006530 /def=homo sapiens cdna flj10214 fis |
| 232639_at                                                                                                                                                                 | chromosome 3 open reading frame 25                                                                                                                                                                                                                                                                                                                                              |
| 209420_s_at                                                                                                                                                               | sphingomyelin phosphodiesterase 1, acid lysosomal (acid sphingomyelinase)                                                                                                                                                                                                                                                                                                       |
| 215599_at                                                                                                                                                                 | sma4                                                                                                                                                                                                                                                                                                                                                                            |

|                                                                  |                                           |                                                        |
|------------------------------------------------------------------|-------------------------------------------|--------------------------------------------------------|
| 204699_s_at,<br>204700_x_at                                      | 214193_s_at                               | chromosome 1 open reading frame 107                    |
| 225176_at                                                        |                                           | mstp146                                                |
| 238432_at                                                        |                                           | discs, large (drosophila) homolog-associated protein 1 |
| 205479_s_at, 211668_s_at                                         |                                           | plasminogen activator, urokinase                       |
| 1568732_at,<br>209082_s_at                                       | 209081_s_at                               | collagen, type xviii, alpha 1                          |
| 218925_s_at,<br>231538_at, 222785_x_at                           | 231530_s_at                               | chromosome 11 open reading frame 1                     |
| 237797_at,<br>226154_at, 236032_at                               | 203105_s_at                               | dynamamin 1-like                                       |
| 227616_at, 228065_at                                             |                                           | b-cell cll/lymphoma 9-like                             |
| 206951_at,<br>232035_at,<br>208580_x_at,<br>207046_at, 208076_at | 208181_at,<br>214463_x_at,<br>208180_s_at | h4 histone, family 2                                   |
| 209604_s_at,<br>209603_at                                        | 209602_s_at                               | gata binding protein 3                                 |
| 1553127_a_at, 237147_at                                          |                                           | ring finger protein 168                                |
| 202982_s_at                                                      |                                           | acyl-coa thioesterase 2                                |
| 238432_at                                                        |                                           | hypothetical protein mgc11082                          |
| 205717_x_at,<br>211876_x_at,<br>211066_x_at                      | 215836_s_at,<br>209079_x_at               | protocadherin gamma subfamily a, 5                     |
| 203133_at, 244700_at                                             |                                           | sec61 beta subunit                                     |
| 241919_x_at                                                      |                                           | wd repeat domain 31                                    |
| 202440_s_at                                                      |                                           | suppression of tumorigenicity 5                        |
| 1562161_at,<br>224857_s_at                                       | 224874_at                                 | hypothetical protein mgc9850                           |
| 228819_at                                                        |                                           | tetraspanin 18                                         |
| 226829_at                                                        |                                           | kiaa1914                                               |
| 201720_s_at, 201721_s_at                                         |                                           | lysosomal associated multispinning membrane protein 5  |
| 236981_at                                                        |                                           | glpg464                                                |
| 1570021_at                                                       |                                           | homeobox c14                                           |
| 227309_at                                                        |                                           | yod1 otu deubiquinating enzyme 1 homolog ( yeast)      |
| 225449_at,<br>235249_at, 227360_at                               | 225467_s_at                               | retinol dehydrogenase 13 (all-trans and 9-cis)         |
| 231045_x_at,<br>228332_s_at,<br>1557799_at, 1557801_x_at         | 228331_at,<br>224677_x_at                 | chromosome 11 open reading frame 31                    |
| 1555495_a_at,                                                    | 241106_at,                                | serologically defined colon cancer antigen 10          |

|                                                                                         |                                                                                                                                                                                                                                                                                                                                                                                                     |
|-----------------------------------------------------------------------------------------|-----------------------------------------------------------------------------------------------------------------------------------------------------------------------------------------------------------------------------------------------------------------------------------------------------------------------------------------------------------------------------------------------------|
| 1558841_at, 223337_at                                                                   |                                                                                                                                                                                                                                                                                                                                                                                                     |
| 1553359_at, 215068_s_at,<br>1553361_x_at, 216395_at,<br>227500_at, 220896_at            | f-box and leucine-rich repeat protein 18                                                                                                                                                                                                                                                                                                                                                            |
| 225419_at                                                                               | chromosome 7 open reading frame 11                                                                                                                                                                                                                                                                                                                                                                  |
| 218268_at                                                                               | tbc1 domain family, member 15                                                                                                                                                                                                                                                                                                                                                                       |
| 1569041_at, 228793_at,<br>241659_at, 241661_at,<br>230007_at, 224933_s_at,<br>221763_at | thyroid hormone receptor interactor 8                                                                                                                                                                                                                                                                                                                                                               |
| 232699_at                                                                               | ,consensus includes gb:ak021990.1 /def=homo sapiens cdna flj11928<br>fis, clone hembb1000420. /fea=mrna /db_xref=gi:10433299<br>/ug=hs.287466 homo sapiens cdna flj11928 fis,gb:ak021990.1<br>/db_xref=gi:10433299 /fea=mrna /cnt=6 /tid=hs.287466.0<br>/tier=consend /stk=0 /ug=hs.287466 /ug_title=homo sapiens cdna<br>flj11928 fis, clone hembb1000420 /def=homo sapiens cdna flj11928<br>fis   |
| 1554543_at, 206748_s_at,<br>212468_at, 212470_at                                        | sperm associated antigen 9                                                                                                                                                                                                                                                                                                                                                                          |
| 232796_at                                                                               | ,consensus includes gb:ak021556.1 /def=homo sapiens cdna flj11494<br>fis, clone hembra1001942. /fea=mrna /db_xref=gi:10432759<br>/ug=hs.145444 homo sapiens cdna flj11494 fis,gb:ak021556.1<br>/db_xref=gi:10432759 /fea=mrna /cnt=5 /tid=hs.145444.0<br>/tier=consend /stk=0 /ug=hs.145444 /ug_title=homo sapiens cdna<br>flj11494 fis, clone hembra1001942 /def=homo sapiens cdna flj11494<br>fis |
| 1560727_at, 1569419_at,<br>237445_at                                                    | hypothetical mgc48595                                                                                                                                                                                                                                                                                                                                                                               |
| 222290_at                                                                               | olfactory receptor, family 2, subfamily a, member 9 pseudogene                                                                                                                                                                                                                                                                                                                                      |
| 235503_at                                                                               | ankyrin repeat and socs box-containing 5                                                                                                                                                                                                                                                                                                                                                            |
| 233260_at                                                                               | ,consensus includes gb:au157106 /fea=est /db_xref=gi:11018627<br>/db_xref=est:au157106 /clone=place1006143 /ug=hs.288808 homo<br>sapiens cdna flj13528 fis, clone place1006143,gb:au157106<br>/db_xref=gi:11018627 /db_xref=au157106 /clone=place1006143<br>/fea=mrna /cnt=5 /tid=hs.288808.0 /tier=consend /stk=1<br>/ug=hs.288808 /ug_title=homo sapiens cdna flj13528 fis                        |
| 228078_at                                                                               | myosin xva                                                                                                                                                                                                                                                                                                                                                                                          |
| 1562367_at                                                                              | flj39531 protein                                                                                                                                                                                                                                                                                                                                                                                    |
| 218898_at                                                                               | family with sequence similarity 57, member a                                                                                                                                                                                                                                                                                                                                                        |
| 201340_s_at, 201341_at                                                                  | ectodermal-neural cortex (with btb-like domain)                                                                                                                                                                                                                                                                                                                                                     |
| 229252_at                                                                               | atg9 autophagy related 9 homolog b (s. cerevisiae)                                                                                                                                                                                                                                                                                                                                                  |

|                                                                                                             |                                                                                                                                                                                                                                                                                                                                                               |
|-------------------------------------------------------------------------------------------------------------|---------------------------------------------------------------------------------------------------------------------------------------------------------------------------------------------------------------------------------------------------------------------------------------------------------------------------------------------------------------|
| 1563549_a_at                                                                                                | transmembrane protein 16h                                                                                                                                                                                                                                                                                                                                     |
| 202419_at                                                                                                   | follicular lymphoma variant translocation 1                                                                                                                                                                                                                                                                                                                   |
| 233407_at                                                                                                   | ,consensus includes gb:au147282 /fea=est /db_xref=gi:11008803 /db_xref=est:au147282 /clone=mamma1000227 /ug=hs.297706 homo sapiens cdna flj14088 fis, clone mamma1000227,gb:au147282 /db_xref=gi:11008803 /db_xref=au147282 /clone=mamma1000227 /fea=mrna /cnt=5 /tid=hs.297706.0 /tier=consend /stk=1 /ug=hs.297706 /ug_title=homo sapiens cdna flj14088 fis |
| 223748_at                                                                                                   | solute carrier family 4, sodium bicarbonate transporter-like, member 11                                                                                                                                                                                                                                                                                       |
| 233404_at                                                                                                   | ,consensus includes gb:au158588 /fea=est /db_xref=gi:11020109 /db_xref=est:au158588 /clone=place3000365 /ug=hs.301204 homo sapiens cdna flj13756 fis, clone place3000365,gb:au158588 /db_xref=gi:11020109 /db_xref=au158588 /clone=place3000365 /fea=mrna /cnt=4 /tid=hs.301204.0 /tier=consend /stk=1 /ug=hs.301204 /ug_title=homo sapiens cdna flj13756 fis |
| 213605_s_at                                                                                                 | glucuronidase, beta-like 2                                                                                                                                                                                                                                                                                                                                    |
| 201012_at, 233011_at                                                                                        | annexin a1                                                                                                                                                                                                                                                                                                                                                    |
| 238924_at                                                                                                   | hypothetical protein loc255326                                                                                                                                                                                                                                                                                                                                |
| 1565669_at                                                                                                  | hypothetical protein mgc5629                                                                                                                                                                                                                                                                                                                                  |
| 1569660_at                                                                                                  | hypothetical protein pp13439                                                                                                                                                                                                                                                                                                                                  |
| 219041_s_at, 222501_s_at, 228815_s_at                                                                       | zinc finger protein                                                                                                                                                                                                                                                                                                                                           |
| 1557517_a_at, 209512_at, 209513_s_at, 215436_at                                                             | hydroxysteroid dehydrogenase like 2                                                                                                                                                                                                                                                                                                                           |
| 229510_at                                                                                                   | ms4a13 protein                                                                                                                                                                                                                                                                                                                                                |
| 203499_at                                                                                                   | eph receptor a2                                                                                                                                                                                                                                                                                                                                               |
| 205020_s_at                                                                                                 | adp-ribosylation factor-like 4a                                                                                                                                                                                                                                                                                                                               |
| 224747_at                                                                                                   | ubiquitin-conjugating enzyme e2q (putative) 2                                                                                                                                                                                                                                                                                                                 |
| 212296_at                                                                                                   | proteasome (prosome, macropain) 26s subunit, non-atpase, 14                                                                                                                                                                                                                                                                                                   |
| 213246_at                                                                                                   | chromosome 14 open reading frame 109                                                                                                                                                                                                                                                                                                                          |
| 200671_s_at, 215918_s_at, 242220_at, 230540_at, 228246_s_at, 226342_at, 214856_at, 200672_x_at, 213914_s_at | spectrin, beta, non-erythrocytic 1                                                                                                                                                                                                                                                                                                                            |
| 226574_at                                                                                                   | tp53 and pten homologous inositol lipid phosphatase pseudogene                                                                                                                                                                                                                                                                                                |
| 1556385_at, 219500_at, 235525_at                                                                            | cardiotrophin-like cytokine factor 1                                                                                                                                                                                                                                                                                                                          |
| 209351_at                                                                                                   | keratin 14 (epidermolysis bullosa simplex, dowling-meara, koebner)                                                                                                                                                                                                                                                                                            |
| 208512_s_at, 210409_at                                                                                      | myeloid/lymphoid or mixed-lineage leukemia (trithorax homolog,                                                                                                                                                                                                                                                                                                |



|                                                                                                                |                                                                                                                                                                                                                                                                                                                                         |
|----------------------------------------------------------------------------------------------------------------|-----------------------------------------------------------------------------------------------------------------------------------------------------------------------------------------------------------------------------------------------------------------------------------------------------------------------------------------|
| 229775_s_at, 238871_at,<br>230622_at, 224685_at                                                                | drosophila); translocated to, 4                                                                                                                                                                                                                                                                                                         |
| 212447_at, 223584_s_at,<br>223585_x_at                                                                         | kelch repeat and btb (poz) domain containing 2                                                                                                                                                                                                                                                                                          |
| 213353_at, 241705_at                                                                                           | atp-binding cassette, sub-family a (abc1), member 5                                                                                                                                                                                                                                                                                     |
| 212598_at, 238660_at, 212602_at                                                                                | wd repeat and fyve domain containing 3                                                                                                                                                                                                                                                                                                  |
| 203559_s_at                                                                                                    | amiloride binding protein 1 (amine oxidase (copper-containing))                                                                                                                                                                                                                                                                         |
| 203753_at, 222146_s_at,<br>215164_at, 237749_at,<br>244480_at, 240321_at                                       | transcription factor 4                                                                                                                                                                                                                                                                                                                  |
| 215410_at                                                                                                      | postmeiotic segregation increased 2-like 3                                                                                                                                                                                                                                                                                              |
| 219243_at                                                                                                      | gtpase, imap family member 4                                                                                                                                                                                                                                                                                                            |
| 225129_at                                                                                                      | copine ii                                                                                                                                                                                                                                                                                                                               |
| 1553088_a_at, 1558143_a_at,<br>1553096_s_at, 208536_s_at,<br>222343_at                                         | bcl2-like 11 (apoptosis facilitator)                                                                                                                                                                                                                                                                                                    |
| 233530_at, 236520_at, 239248_at                                                                                | cdna flj44985 fis, clone brawh3005037                                                                                                                                                                                                                                                                                                   |
| 207467_x_at, 208908_s_at,<br>212586_at                                                                         | calpastatin                                                                                                                                                                                                                                                                                                                             |
| 231634_at                                                                                                      | ,consensus includes gb:bf510426 /fea=est /db_xref=gi:11593724<br>/db_xref=est:ui-h-bi4-aoe-d-02-0-ui.s1 /clone=image:3084698<br>/ug=hs.170789 ests.gb:bf510426 /db_xref=gi:11593724<br>/db_xref=ui-h-bi4-aoe-d-02-0-ui.s1 /clone=image:3084698 /fea=est<br>/cnt=20 /tid=hs.170789.0 /tier=stack /stk=18 /ug=hs.170789<br>/ug_title=ests |
| 221350_at                                                                                                      | homeobox c8                                                                                                                                                                                                                                                                                                                             |
| 203366_at, 217635_s_at,<br>217636_at                                                                           | polymerase (dna directed), gamma                                                                                                                                                                                                                                                                                                        |
| 227816_at, 237847_at                                                                                           | hypothetical loc400572                                                                                                                                                                                                                                                                                                                  |
| 209537_at                                                                                                      | exostoses (multiple)-like 2                                                                                                                                                                                                                                                                                                             |
| 227429_at                                                                                                      | hypothetical protein mgc45840                                                                                                                                                                                                                                                                                                           |
| 203574_at                                                                                                      | nuclear factor, interleukin 3 regulated                                                                                                                                                                                                                                                                                                 |
| 1560322_at, 1564840_at,<br>233608_at, 238447_at,<br>240245_at, 243041_s_at,<br>239604_at, 237860_at, 206767_at | rna binding motif, single stranded interacting protein                                                                                                                                                                                                                                                                                  |
| 1565951_s_at, 226350_at,<br>206079_at                                                                          | choroideremia-like (rab escort protein 2)                                                                                                                                                                                                                                                                                               |
| 235788_at, 202702_at                                                                                           | tripartite motif-containing 26                                                                                                                                                                                                                                                                                                          |
| 226293_at, 226300_at                                                                                           | mediator of rna polymerase ii transcription, subunit 19 homolog<br>(yeast)                                                                                                                                                                                                                                                              |

|                                                                                                                                     |                                                                                                                                                                                                                                                                                                                                                                                                                                                                                |
|-------------------------------------------------------------------------------------------------------------------------------------|--------------------------------------------------------------------------------------------------------------------------------------------------------------------------------------------------------------------------------------------------------------------------------------------------------------------------------------------------------------------------------------------------------------------------------------------------------------------------------|
| 203453_at                                                                                                                           | sodium channel, nonvoltage-gated 1 alpha                                                                                                                                                                                                                                                                                                                                                                                                                                       |
| 215392_at, 244392_at,<br>221654_s_at, 226652_at                                                                                     | ubiquitin specific peptidase 3                                                                                                                                                                                                                                                                                                                                                                                                                                                 |
| 1556088_at, 1564301_a_at,<br>228288_at, 228183_s_at                                                                                 | rpa interacting protein                                                                                                                                                                                                                                                                                                                                                                                                                                                        |
| 1555551_at, 204855_at                                                                                                               | serpin peptidase inhibitor, clade b (ovalbumin), member 5                                                                                                                                                                                                                                                                                                                                                                                                                      |
| 1558975_at, 225874_at,<br>1558976_x_at                                                                                              | family with sequence similarity 100, member a                                                                                                                                                                                                                                                                                                                                                                                                                                  |
| 208087_s_at, 242020_s_at                                                                                                            | z-dna binding protein 1                                                                                                                                                                                                                                                                                                                                                                                                                                                        |
| 218200_s_at, 226391_at,<br>240391_at, 218201_at                                                                                     | nadh dehydrogenase (ubiquinone) 1 beta subcomplex, 2, 8kda                                                                                                                                                                                                                                                                                                                                                                                                                     |
| 203695_s_at                                                                                                                         | deafness, autosomal dominant 5                                                                                                                                                                                                                                                                                                                                                                                                                                                 |
| 201798_s_at, 217518_at,<br>211864_s_at                                                                                              | fer-1-like 3, myoferlin (c. elegans)                                                                                                                                                                                                                                                                                                                                                                                                                                           |
| 1559256_at, 1566538_at,<br>206144_at, 222372_at,<br>1555262_a_at, 225474_at,<br>225465_at, 215372_x_at,<br>1566539_at, 1559257_a_at | membrane associated guanylate kinase, ww and pdz domain containing 1                                                                                                                                                                                                                                                                                                                                                                                                           |
| 1557158_s_at, 222414_at,<br>232940_s_at, 244010_at,<br>235859_at, 222415_at,<br>222413_s_at                                         | myeloid/lymphoid or mixed-lineage leukemia 3                                                                                                                                                                                                                                                                                                                                                                                                                                   |
| 204240_s_at, 213253_at                                                                                                              | smc2 structural maintenance of chromosomes 2-like 1 (yeast)                                                                                                                                                                                                                                                                                                                                                                                                                    |
| 205832_at                                                                                                                           | carboxypeptidase a4                                                                                                                                                                                                                                                                                                                                                                                                                                                            |
| 232205_at                                                                                                                           | ,consensus includes gb:al133627.1 /def=homo sapiens mrna; cdna dkfzp434k0722 (from clone dkfzp434k0722). /fea=mrna /db_xref=gi:6599268 /ug=hs.158923 homo sapiens mrna; cdna dkfzp434k0722 (from clone dkfzp434k0722),gb:al133627.1 /db_xref=gi:6599268 /fea=mrna /cnt=9 /tid=hs.158923.0 /tier=consend /stk=0 /ug=hs.158923 /ug_title=homo sapiens mrna; cdna dkfzp434k0722 (from clone dkfzp434k0722) /def=homo sapiens mrna; cdna dkfzp434k0722 (from clone dkfzp434k0722). |
| 223172_s_at                                                                                                                         | mitochondrial protein 18 kda                                                                                                                                                                                                                                                                                                                                                                                                                                                   |
| 201269_s_at, 242696_at,<br>236676_at, 201270_x_at,<br>215648_at                                                                     | nudc domain containing 3                                                                                                                                                                                                                                                                                                                                                                                                                                                       |
| 202900_s_at                                                                                                                         | nucleoporin 88kda                                                                                                                                                                                                                                                                                                                                                                                                                                                              |
| 224276_at, 231864_at                                                                                                                | zinc finger protein 33a                                                                                                                                                                                                                                                                                                                                                                                                                                                        |
| 213893_x_at, 242201_at,<br>214757_at, 239699_s_at,                                                                                  | postmeiotic segregation increased 2-like 5                                                                                                                                                                                                                                                                                                                                                                                                                                     |

|                                                                |                                                                                                                                                                                                                                                                                      |
|----------------------------------------------------------------|--------------------------------------------------------------------------------------------------------------------------------------------------------------------------------------------------------------------------------------------------------------------------------------|
| 215410_at                                                      |                                                                                                                                                                                                                                                                                      |
| 206289_at                                                      | homeobox a4                                                                                                                                                                                                                                                                          |
| 217130_at                                                      | chromosome 9 open reading frame 33                                                                                                                                                                                                                                                   |
| 219050_s_at, 227734_s_at, 222814_s_at                          | zinc finger, hit type 2                                                                                                                                                                                                                                                              |
| 211410_x_at                                                    | killer cell immunoglobulin-like receptor, two domains, long cytoplasmic tail, 5a                                                                                                                                                                                                     |
| 231849_at                                                      | hypothetical protein loc144501                                                                                                                                                                                                                                                       |
| 1554778_at, 1557578_at, 1554779_s_at, 225688_s_at, 238419_at   | pleckstrin homology-like domain, family b, member 2                                                                                                                                                                                                                                  |
| 202015_x_at, 244185_at, 240769_at, 209861_s_at, 213899_at      | methionyl aminopeptidase 2                                                                                                                                                                                                                                                           |
| 206755_at, 217133_x_at                                         | cytochrome p450, family 2, subfamily b, polypeptide 6                                                                                                                                                                                                                                |
| 223271_s_at, 1555106_a_at, 223270_at                           | hypothetical protein hspc058                                                                                                                                                                                                                                                         |
| 213022_s_at, 213023_at                                         | utrophin (homologous to dystrophin)                                                                                                                                                                                                                                                  |
| 205566_at, 225337_at, 221815_at, 228490_at, 87100_at, 63825_at | abhydrolase domain containing 2                                                                                                                                                                                                                                                      |
| 231673_at                                                      | ,consensus includes gb:aw273730 /fea=est /db_xref=gi:6660760 /db_xref=est:xv23d06.x1 /clone=image:2813963 /ug=hs.98901 ests,gb:aw273730 /db_xref=gi:6660760 /db_xref=xv23d06.x1 /clone=image:2813963 /fea=est /cnt=11 /tid=hs.98901.0 /tier=stack /stk=9 /ug=hs.98901 /ug_title=ests |
| 204247_s_at                                                    | cyclin-dependent kinase 5                                                                                                                                                                                                                                                            |
| 200772_x_at, 211921_x_at, 231168_at, 200773_x_at               | prothymosin, alpha (gene sequence 28)                                                                                                                                                                                                                                                |
| 229558_at                                                      | similar to tsg118.1                                                                                                                                                                                                                                                                  |
| 218848_at                                                      | tho complex 6 homolog (drosophila)                                                                                                                                                                                                                                                   |
| 229550_at                                                      | kiaa1409                                                                                                                                                                                                                                                                             |
| 205807_s_at                                                    | tuftelin 1                                                                                                                                                                                                                                                                           |
| 218708_at, 244719_at                                           | ntf2-like export factor 1                                                                                                                                                                                                                                                            |
| 200930_s_at, 200931_s_at                                       | vinculin                                                                                                                                                                                                                                                                             |
| 221779_at, 55081_at                                            | mical-like 1                                                                                                                                                                                                                                                                         |
| 215506_s_at                                                    | diras family, gtp-binding ras-like 3                                                                                                                                                                                                                                                 |
| 214502_at                                                      | histone 1, h2bj                                                                                                                                                                                                                                                                      |
| 220692_at                                                      | hspc047 protein                                                                                                                                                                                                                                                                      |
| 217626_at                                                      | aldo-keto reductase family 1, member c1 (dihydrodiol dehydrogenase 1; 20-alpha (3-alpha)-hydroxysteroid dehydrogenase)                                                                                                                                                               |

|                                                       |                                            |                                                                                                                                                                                                                                                                                        |
|-------------------------------------------------------|--------------------------------------------|----------------------------------------------------------------------------------------------------------------------------------------------------------------------------------------------------------------------------------------------------------------------------------------|
| 205717_x_at,<br>211873_s_at,<br>211066_x_at           | 215836_s_at,<br>209079_x_at,               | protocadherin gamma subfamily a, 9                                                                                                                                                                                                                                                     |
| 1556990_at,<br>222392_x_at                            | 217744_s_at,                               | perp, tp53 apoptosis effector                                                                                                                                                                                                                                                          |
| 225120_at,<br>226762_at, 228467_at, 235711_at         | 227718_at,                                 | purine-rich element binding protein b                                                                                                                                                                                                                                                  |
| 209800_at                                             |                                            | keratin 16 (focal non-epidermolytic palmoplantar keratoderma)                                                                                                                                                                                                                          |
| 218631_at                                             |                                            | arginine vasopressin-induced 1                                                                                                                                                                                                                                                         |
| 231022_at                                             |                                            | ,consensus includes gb:ai139990 /fea=est /db_xref=gi:3647447 /db_xref=est:qa47d03.x1 /clone=image:1689893 /ug=hs.134586 ests,gb:ai139990 /db_xref=gi:3647447 /db_xref=qa47d03.x1 /clone=image:1689893 /fea=est /cnt=9 /tid=hs.134586.0 /tier=stack /stk=8 /ug=hs.134586 /ug_title=ests |
| 206621_s_at                                           |                                            | williams-beuren syndrome chromosome region 1                                                                                                                                                                                                                                           |
| 206428_s_at, 221873_at                                |                                            | zinc finger protein 143 (clone phz-1)                                                                                                                                                                                                                                                  |
| 240192_at, 240827_at                                  |                                            | flj45983 protein                                                                                                                                                                                                                                                                       |
| 221044_s_at, 224175_s_at                              |                                            | tripartite motif-containing 6 and tripartite motif-containing 34                                                                                                                                                                                                                       |
| 200851_s_at,<br>244594_x_at                           | 215585_at,                                 | kiaa0174                                                                                                                                                                                                                                                                               |
| 208644_at                                             |                                            | poly (adp-ribose) polymerase family, member 1                                                                                                                                                                                                                                          |
| 209154_at                                             |                                            | tax1 (human t-cell leukemia virus type i) binding protein 3                                                                                                                                                                                                                            |
| 1558014_s_at,<br>224866_at                            | 224865_at,                                 | male sterility domain containing 2                                                                                                                                                                                                                                                     |
| 1560929_at,<br>224617_at,<br>214698_at, 207223_s_at   | 214697_s_at,<br>224618_at,                 | rod1 regulator of differentiation 1 (s. pombe)                                                                                                                                                                                                                                         |
| 219793_at, 229618_at                                  |                                            | sorting nexin 16                                                                                                                                                                                                                                                                       |
| 220086_at                                             |                                            | zinc finger protein, subfamily 1a, 5                                                                                                                                                                                                                                                   |
| 234633_at                                             |                                            | keratin associated protein 4-14                                                                                                                                                                                                                                                        |
| 201195_s_at                                           |                                            | solute carrier family 7 (cationic amino acid transporter, y+ system), member 5                                                                                                                                                                                                         |
| 1553532_a_at,<br>240449_at                            | 233362_at,                                 | zinc finger protein 341                                                                                                                                                                                                                                                                |
| 203950_s_at                                           |                                            | chloride channel 6                                                                                                                                                                                                                                                                     |
| 1569434_at,<br>237087_at, 236952_at                   | 220084_at,                                 | chromosome 14 open reading frame 105                                                                                                                                                                                                                                                   |
| 1566114_at,<br>241396_at,<br>237498_at,<br>1566115_at | 212448_at,<br>242132_x_at,<br>212445_s_at, | neural precursor cell expressed, developmentally down-regulated 4-like                                                                                                                                                                                                                 |

|                                                                                                                                        |                                                                                                                                                                                                                                                                                       |
|----------------------------------------------------------------------------------------------------------------------------------------|---------------------------------------------------------------------------------------------------------------------------------------------------------------------------------------------------------------------------------------------------------------------------------------|
| 1554616_at, 206034_at                                                                                                                  | serpin peptidase inhibitor, clade b (ovalbumin), member 8                                                                                                                                                                                                                             |
| 1557527_at, 209360_s_at,<br>210805_x_at, 236114_at,<br>217263_x_at, 211180_x_at,<br>210365_at, 209359_x_at,<br>208129_x_at             | runt-related transcription factor 1 (acute myeloid leukemia 1; aml1 oncogene)                                                                                                                                                                                                         |
| 242485_at, 242240_at,<br>241453_at, 241387_at,<br>240543_at, 239121_at,<br>1559529_at, 207821_s_at,<br>208820_at, 234215_at, 234211_at | ptk2 protein tyrosine kinase 2                                                                                                                                                                                                                                                        |
| 200946_x_at, 200947_s_at                                                                                                               | glutamate dehydrogenase 1                                                                                                                                                                                                                                                             |
| 1561054_a_at, 222341_x_at,<br>225017_at, 241638_at, 240884_at                                                                          | coiled-coil domain containing 14                                                                                                                                                                                                                                                      |
| 230846_at                                                                                                                              | ,consensus includes gb:r43202 /fea=est /db_xref=gi:825427 /db_xref=est:yg18g08.s1 /clone=image:32766 /ug=hs.22902 ests,gb:r43202 /db_xref=gi:825427 /db_xref=yg18g08.s1 /clone=image:32766 /fea=est /cnt=8 /tid=hs.22902.0 /tier=stack /stk=8 /ug=hs.22902 /ug_title=ests             |
| 230653_at, 241804_at                                                                                                                   | hypothetical loc389295                                                                                                                                                                                                                                                                |
| 223796_at                                                                                                                              | contactin associated protein-like 3b                                                                                                                                                                                                                                                  |
| 217995_at                                                                                                                              | sulfide quinone reductase-like (yeast)                                                                                                                                                                                                                                                |
| 1557170_at, 1557172_x_at                                                                                                               | nima (never in mitosis gene a)- related kinase 8                                                                                                                                                                                                                                      |
| 231406_at                                                                                                                              | hypothetical loc401394                                                                                                                                                                                                                                                                |
| 200773_x_at                                                                                                                            | similar to prothymosin alpha                                                                                                                                                                                                                                                          |
| 209432_s_at, 236132_at                                                                                                                 | camp responsive element binding protein 3                                                                                                                                                                                                                                             |
| 1554030_at, 206129_s_at,<br>1554032_at                                                                                                 | arylsulfatase b                                                                                                                                                                                                                                                                       |
| 233283_at                                                                                                                              | farnesyltransferase, caax box, beta                                                                                                                                                                                                                                                   |
| 231293_at                                                                                                                              | ,consensus includes gb:bf112037 /fea=est /db_xref=gi:10941650 /db_xref=est:7137h05.x1 /clone=image:3523809 /ug=hs.24418 ests,gb:bf112037 /db_xref=gi:10941650 /db_xref=7137h05.x1 /clone=image:3523809 /fea=est /cnt=8 /tid=hs.24418.0 /tier=stack /stk=8 /ug=hs.24418 /ug_title=ests |
| 1561128_at, 237875_at,<br>40420_at, 203047_at                                                                                          | serine/threonine kinase 10                                                                                                                                                                                                                                                            |
| 1570145_at, 219960_s_at                                                                                                                | ubiquitin carboxyl-terminal hydrolase l5                                                                                                                                                                                                                                              |
| 203367_at                                                                                                                              | dual specificity phosphatase 14                                                                                                                                                                                                                                                       |
| 219933_at                                                                                                                              | glutaredoxin 2                                                                                                                                                                                                                                                                        |
| 207526_s_at, 210442_at,<br>234066_at, 242809_at                                                                                        | interleukin 1 receptor-like 1                                                                                                                                                                                                                                                         |

|                                                                               |                                                                                                                                                                                                                                                                                         |
|-------------------------------------------------------------------------------|-----------------------------------------------------------------------------------------------------------------------------------------------------------------------------------------------------------------------------------------------------------------------------------------|
| 202392_s_at                                                                   | phosphatidylserine decarboxylase                                                                                                                                                                                                                                                        |
| 202804_at, 202805_s_at                                                        | atp-binding cassette, sub-family c (cftr/mrp), member 1                                                                                                                                                                                                                                 |
| 224469_s_at                                                                   | chromosome 14 open reading frame 151                                                                                                                                                                                                                                                    |
| 205945_at, 217489_s_at                                                        | interleukin 6 receptor                                                                                                                                                                                                                                                                  |
| 230062_at                                                                     | similar to peripheral-type benzodiazepine receptor-associated protein 1 (prax-1) (peripheral benzodiazepine receptor interacting protein) (pbr-ip) (rim binding protein 1) (rim-bp1)                                                                                                    |
| 212508_at                                                                     | modulator of apoptosis 1                                                                                                                                                                                                                                                                |
| 207524_at, 207871_s_at                                                        | suppression of tumorigenicity 7                                                                                                                                                                                                                                                         |
| 205717_x_at, 224536_s_at, 224537_at, 215836_s_at, 209079_x_at, 211066_x_at    | protocadherin gamma subfamily c, 5                                                                                                                                                                                                                                                      |
| 200636_s_at, 215066_at, 200635_s_at, 200637_s_at                              | protein tyrosine phosphatase, receptor type, f                                                                                                                                                                                                                                          |
| 1557703_at, 202654_x_at, 1557704_a_at, 202653_s_at                            | membrane-associated ring finger (c3hc4) 7                                                                                                                                                                                                                                               |
| 1558719_s_at                                                                  | complement component 1, q subcomponent binding protein                                                                                                                                                                                                                                  |
| 1556588_at                                                                    | chromosome 15 open reading frame 37                                                                                                                                                                                                                                                     |
| 1564164_at, 219696_at, 234041_at                                              | hypothetical protein flj20054                                                                                                                                                                                                                                                           |
| 231136_at                                                                     | ,consensus includes gb:ai087792 /fea=est /db_xref=gi:3426825 /db_xref=est:oo20c01.x1 /clone=image:1566720 /ug=hs.166545 ests,gb:ai087792 /db_xref=gi:3426825 /db_xref=oo20c01.x1 /clone=image:1566720 /fea=est /cnt=10 /tid=hs.166545.0 /tier=stack /stk=8 /ug=hs.166545 /ug_title=ests |
| 1554663_a_at, 214250_at, 214251_s_at, 200747_s_at                             | nuclear mitotic apparatus protein 1                                                                                                                                                                                                                                                     |
| 219395_at                                                                     | rna binding motif protein 35b                                                                                                                                                                                                                                                           |
| 230660_at, 235337_at                                                          | serta domain containing 4                                                                                                                                                                                                                                                               |
| 207243_s_at, 235190_at, 229571_at, 236159_x_at                                | calmodulin 1 (phosphorylase kinase, delta)                                                                                                                                                                                                                                              |
| 213605_s_at                                                                   | similar to sma5 protein                                                                                                                                                                                                                                                                 |
| 212048_s_at, 238760_at                                                        | tyrosyl-trna synthetase                                                                                                                                                                                                                                                                 |
| 215723_s_at, 226636_at, 232530_at, 215724_at, 205203_at, 177_at, 1557126_a_at | phospholipase d1, phosphatidylcholine-specific                                                                                                                                                                                                                                          |
| 202518_at                                                                     | b-cell cll/lymphoma 7b                                                                                                                                                                                                                                                                  |
| 1555638_a_at, 1569599_at, 220330_s_at                                         | sam domain, sh3 domain and nuclear localisation signals, 1                                                                                                                                                                                                                              |
| 202047_s_at, 202048_s_at                                                      | chromobox homolog 6                                                                                                                                                                                                                                                                     |
| 1556134_a_at                                                                  | mcf.2 cell line derived transforming sequence-like 2                                                                                                                                                                                                                                    |

|                                                                                |                                                                                                                                                                                                                                                                                            |
|--------------------------------------------------------------------------------|--------------------------------------------------------------------------------------------------------------------------------------------------------------------------------------------------------------------------------------------------------------------------------------------|
| 231876_at                                                                      | tripartite motif-containing 56                                                                                                                                                                                                                                                             |
| 222989_s_at, 222990_at, 222991_s_at                                            | ubiquilin 1                                                                                                                                                                                                                                                                                |
| 212901_s_at                                                                    | cleavage stimulation factor, 3' pre-rna, subunit 2, 64kda, tau variant                                                                                                                                                                                                                     |
| 1558310_s_at, 227901_at                                                        | hypothetical protein flj90723                                                                                                                                                                                                                                                              |
| 238017_at                                                                      | retinal short chain dehydrogenase reductase isoform 1                                                                                                                                                                                                                                      |
| 1557545_s_at, 230143_at, 1569080_at                                            | chromosome 18 open reading frame 23                                                                                                                                                                                                                                                        |
| 204795_at, 244204_at                                                           | proline rich 3                                                                                                                                                                                                                                                                             |
| 1559759_at, 209661_at                                                          | kinesin family member c3                                                                                                                                                                                                                                                                   |
| 226390_at                                                                      | start domain containing 4, sterol regulated                                                                                                                                                                                                                                                |
| 214390_s_at, 225285_at, 214452_at                                              | branched chain aminotransferase 1, cytosolic                                                                                                                                                                                                                                               |
| 230048_at                                                                      | ,consensus includes gb:bf061555 /fea=est /db_xref=gi:10820386 /db_xref=est:7j53a06.x1 /clone=image:3390130 /ug=hs.116110 ests,gb:bf061555 /db_xref=gi:10820386 /db_xref=7j53a06.x1 /clone=image:3390130 /fea=est /cnt=11 /tid=hs.116110.0 /tier=stack /stk=11 /ug=hs.116110 /ug_title=ests |
| 223498_at, 244461_at, 240765_at                                                | spectrin domain with coiled-coils 1                                                                                                                                                                                                                                                        |
| 1566476_at, 202211_at, 1566477_at                                              | adp-ribosylation factor gtpase activating protein 3                                                                                                                                                                                                                                        |
| 221620_s_at                                                                    | hypothetical protein mgc4825                                                                                                                                                                                                                                                               |
| 1559437_at                                                                     | similar to cohesin subunit sa-3 (stromal antigen 3) (stromalin 3) (scc3 homolog 3)                                                                                                                                                                                                         |
| 212202_s_at, 223772_s_at, 223771_at, 212204_at                                 | transmembrane protein 87a                                                                                                                                                                                                                                                                  |
| 1570439_at, 204089_x_at, 238623_at, 211437_at                                  | mitogen-activated protein kinase kinase kinase 4                                                                                                                                                                                                                                           |
| 1553906_s_at, 215602_at, 242632_at, 1565754_x_at, 1565751_at, 1565752_at       | fyve, rhogef and ph domain containing 2                                                                                                                                                                                                                                                    |
| 1555240_s_at, 222834_s_at, 212294_at                                           | guanine nucleotide binding protein (g protein), gamma 12                                                                                                                                                                                                                                   |
| 1558392_at, 240777_at, 242774_at, 202761_s_at, 243841_at, 244838_at, 244568_at | spectrin repeat containing, nuclear envelope 2                                                                                                                                                                                                                                             |
| 213649_at, 214141_x_at                                                         | splicing factor, arginine/serine-rich 7, 35kda                                                                                                                                                                                                                                             |
| 201820_at, 214399_s_at, 213240_s_at                                            | keratin 4                                                                                                                                                                                                                                                                                  |
| 226026_at                                                                      | disrupted in renal carcinoma 2                                                                                                                                                                                                                                                             |
| 1554923_at, 226586_at                                                          | ankyrin repeat and sterile alpha motif domain containing 6                                                                                                                                                                                                                                 |

|                                                                                 |                                                                                                                                                                                                                                                                                         |
|---------------------------------------------------------------------------------|-----------------------------------------------------------------------------------------------------------------------------------------------------------------------------------------------------------------------------------------------------------------------------------------|
| 235903_at, 238626_at                                                            |                                                                                                                                                                                                                                                                                         |
| 1553930_at                                                                      | trace amine associated receptor 1                                                                                                                                                                                                                                                       |
| 202619_s_at, 202620_s_at                                                        | procollagen-lysine, 2-oxoglutarate 5-dioxygenase 2                                                                                                                                                                                                                                      |
| 225883_at, 229389_at                                                            | atg16 autophagy related 16-like 2 (s. cerevisiae)                                                                                                                                                                                                                                       |
| 218007_s_at, 222487_s_at                                                        | ribosomal protein s27-like                                                                                                                                                                                                                                                              |
| 202500_at                                                                       | dnaj (hsp40) homolog, subfamily b, member 2                                                                                                                                                                                                                                             |
| 230617_at                                                                       | ,consensus includes gb:ai288796 /fea=est /db_xref=gi:3932299 /db_xref=est:qm06g09.x1 /clone=image:1881088 /ug=hs.134434 ests,gb:ai288796 /db_xref=gi:3932299 /db_xref=qm06g09.x1 /clone=image:1881088 /fea=est /cnt=11 /tid=hs.134434.0 /tier=stack /stk=8 /ug=hs.134434 /ug_title=ests |
| 201717_at                                                                       | mitochondrial ribosomal protein l49                                                                                                                                                                                                                                                     |
| 230499_at                                                                       | baculoviral iap repeat-containing 3                                                                                                                                                                                                                                                     |
| 1555680_a_at, 210357_s_at, 217074_at                                            | spermine oxidase                                                                                                                                                                                                                                                                        |
| 209898_x_at, 210545_at, 241641_at, 242413_at, 241648_at, 240941_at, 209907_s_at | sh3 domain protein 1b                                                                                                                                                                                                                                                                   |
| 201695_s_at                                                                     | nucleoside phosphorylase                                                                                                                                                                                                                                                                |
| 206437_at                                                                       | endothelial differentiation, lysophosphatidic acid g-protein-coupled receptor, 6                                                                                                                                                                                                        |
| 212458_at, 212466_at, 214026_s_at                                               | sprouty-related, evh1 domain containing 2                                                                                                                                                                                                                                               |
| 201506_at                                                                       | transforming growth factor, beta-induced, 68kda                                                                                                                                                                                                                                         |
| 228071_at                                                                       | gtpase, imap family member 7                                                                                                                                                                                                                                                            |
| 211320_s_at                                                                     | protein tyrosine phosphatase, receptor type, u                                                                                                                                                                                                                                          |
| 214936_at, 226795_at, 232817_at, 235012_at, 240977_at, 232937_at                | leucine-rich repeats and calponin homology (ch) domain containing 1                                                                                                                                                                                                                     |
| 225715_at                                                                       | raptor                                                                                                                                                                                                                                                                                  |
| 1553185_at, 1553186_x_at, 1553986_at                                            | ras and ef-hand domain containing                                                                                                                                                                                                                                                       |
| 205032_at, 237728_at                                                            | integrin, alpha 2 (cd49b, alpha 2 subunit of vla-2 receptor)                                                                                                                                                                                                                            |
| 220308_at                                                                       | coiled-coil domain containing 19                                                                                                                                                                                                                                                        |
| 205262_at                                                                       | potassium voltage-gated channel, subfamily h (eag-related), member 2                                                                                                                                                                                                                    |
| 225593_at                                                                       | lsm10, u7 small nuclear rna associated                                                                                                                                                                                                                                                  |
| 231292_at                                                                       | e1a-like inhibitor of differentiation 3                                                                                                                                                                                                                                                 |
| 204120_s_at, 239940_at, 1569921_at, 204119_s_at,                                | adenosine kinase                                                                                                                                                                                                                                                                        |



|                                                |                                                                                                 |
|------------------------------------------------|-------------------------------------------------------------------------------------------------|
| 239501_at                                      |                                                                                                 |
| 218416_s_at, 48106_at                          | 218417_s_at, hypothetical protein flj20489                                                      |
| 202111_at                                      | solute carrier family 4, anion exchanger, member 2 (erythrocyte membrane protein band 3-like 1) |
| 1556009_at, 1558164_s_at, 244560_at, 205246_at | 1558163_at, 232945_at, peroxisome biogenesis factor 13                                          |
| 1554440_at, 204546_at                          | kiaa0513                                                                                        |
| 204172_at, 234059_at                           | coproporphyrinogen oxidase                                                                      |
| 1552878_at, 1552879_a_at                       | atonal homolog 7 (drosophila)                                                                   |
| 1564733_at, 213489_at, 211556_at               | 202501_at, microtubule-associated protein, rp/eb family, member 2                               |
| 201032_at                                      | bladder cancer associated protein                                                               |
| 205211_s_at                                    | ras and rab interactor 1                                                                        |
| 1555000_at, 224480_s_at                        | hypothetical protein mgc11324                                                                   |
| 1553940_a_at, 227423_at, 239471_at             | 238897_at, leucine rich repeat containing 28                                                    |
| 226018_at, 227000_at                           | hypothetical protein ells1                                                                      |
| 206814_at                                      | nerve growth factor, beta polypeptide                                                           |
| 224562_at                                      | was protein family, member 2                                                                    |
| 206194_at                                      | hypothetical gene supported by ak022887; ak056417                                               |
| 241031_at                                      | nuclear localized factor 1                                                                      |
| 225614_at                                      | serum amyloid a-like 1                                                                          |
| 1554934_at, 218352_at                          | regulator of chromosome condensation (rcc1) and btb (poz) domain containing protein 1           |

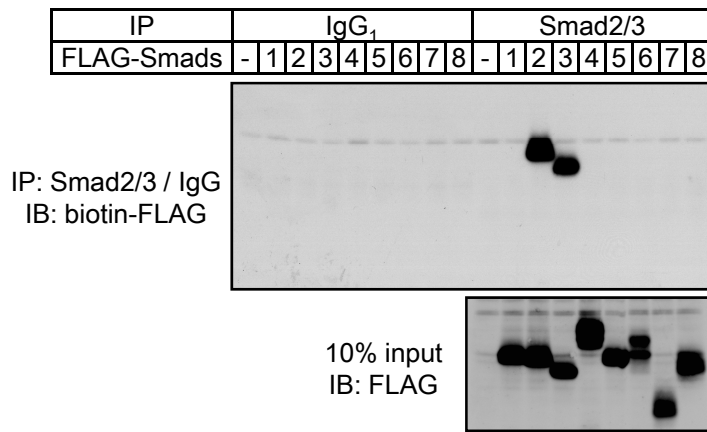

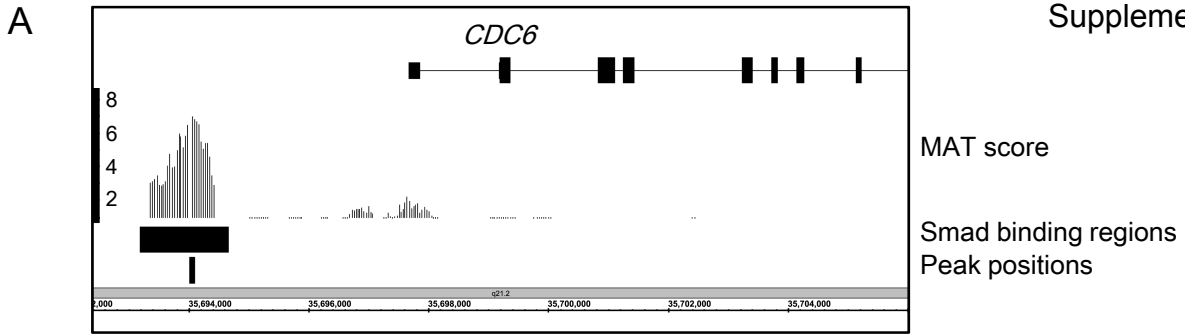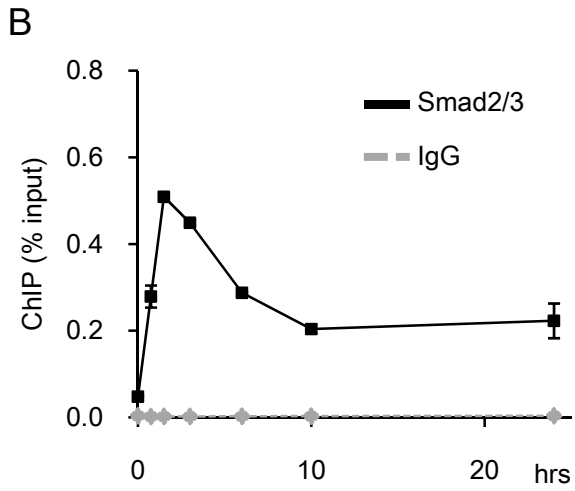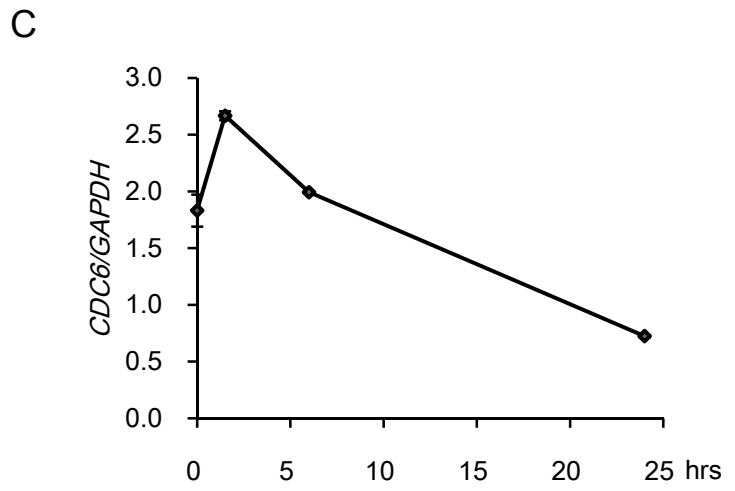

| ChIP       | Smad binding regions                |                    |                    |              |             |             |               |             |              |               |               |               |               | Control      |              |     |
|------------|-------------------------------------|--------------------|--------------------|--------------|-------------|-------------|---------------|-------------|--------------|---------------|---------------|---------------|---------------|--------------|--------------|-----|
| SMAD2/3    | 3.17                                | 3.17               | 3.45               | 3.07         | 3.15        | 3.15        | 3.14          | 3.14        | 3.14         | 3.14          | 3.14          | 3.14          | 3.14          | 1.61         | 1.21         | 1.4 |
| JUN        | 2.11                                | 1.91               | 1.62               | 3.32         | 2.02        | 2.62        | 2.51          | 1.31        | 1.31         | 1.30          | 1.30          | 1.30          | 1.30          | 1.51         | 1.61         | 1.1 |
| ETS1       | 2.12                                | 5.16               | 1.71               | 1.51         | 1.31        | 1.71        | 1.41          | 1.61        | 1.51         | 1.31          | 1.41          | 1.91          | 1.62          | 2.9          |              |     |
| TFAP2A     | 2.62                                | 3.22               | 2.11               | 1.71         | 1.71        | 1.21        | 1.41          | 1.31        | 1.21         | 1.31          | 1.42          | 2.17          | 2.1           |              |              |     |
| Annotation | <i>SERPINE1</i>                     | <i>CDKN1A SBR1</i> | <i>CDKN1A SBR2</i> | <i>SMAD7</i> | <i>EGFR</i> | <i>CDC6</i> | <i>SLC9A1</i> | <i>ETS1</i> | <i>TRAF7</i> | <i>RNF152</i> | <i>TFAP2A</i> | <i>TRIM25</i> | <i>HOXA13</i> | <i>HPRT1</i> | <i>KIF5B</i> |     |
|            | TGF- $\beta$ induced binding (fold) |                    |                    |              |             |             |               |             |              |               |               |               |               |              |              |     |
|            | 3.0 -                               |                    |                    |              |             |             |               |             |              |               |               |               |               |              |              |     |
|            | 2.0 -                               |                    |                    |              |             |             |               |             |              |               |               |               |               |              |              |     |
|            | 1.5 -                               |                    |                    |              |             |             |               |             |              |               |               |               |               |              |              |     |
|            | 1.0 -                               |                    |                    |              |             |             |               |             |              |               |               |               |               |              |              |     |
|            | <1.0                                |                    |                    |              |             |             |               |             |              |               |               |               |               |              |              |     |

A

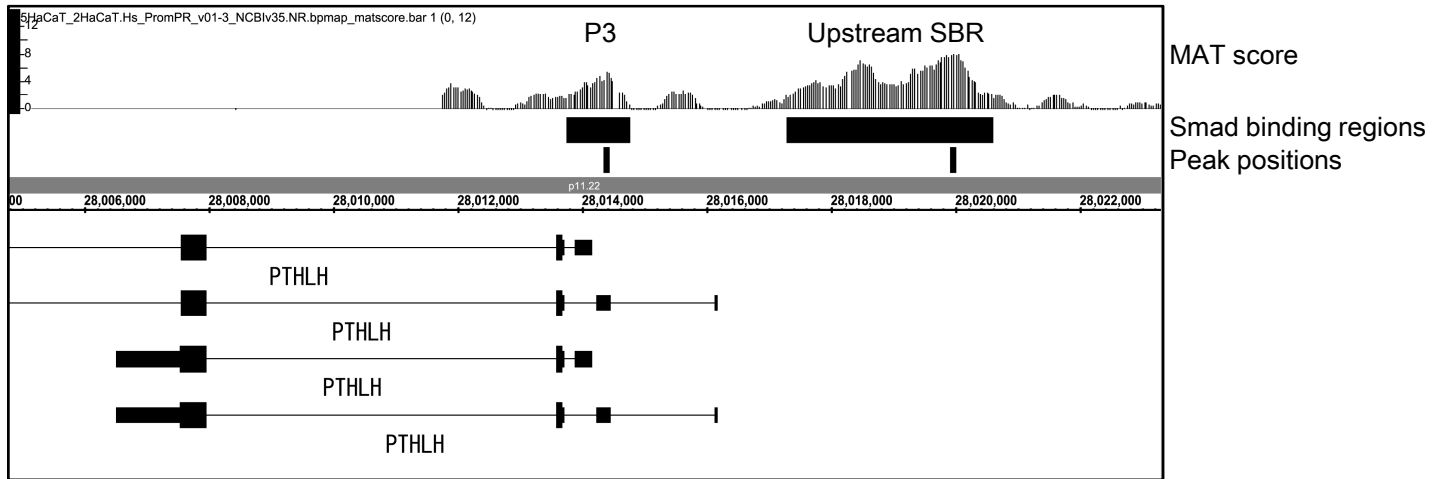

B

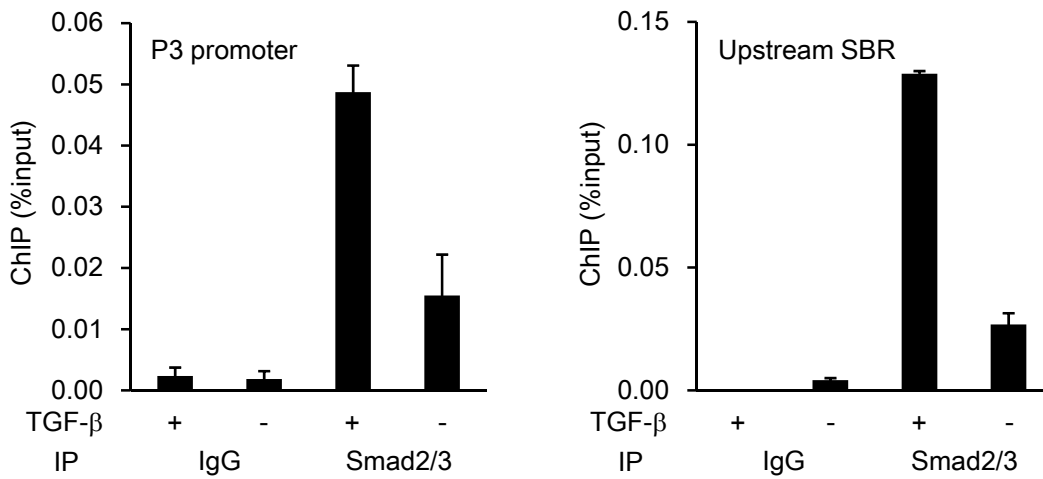

C

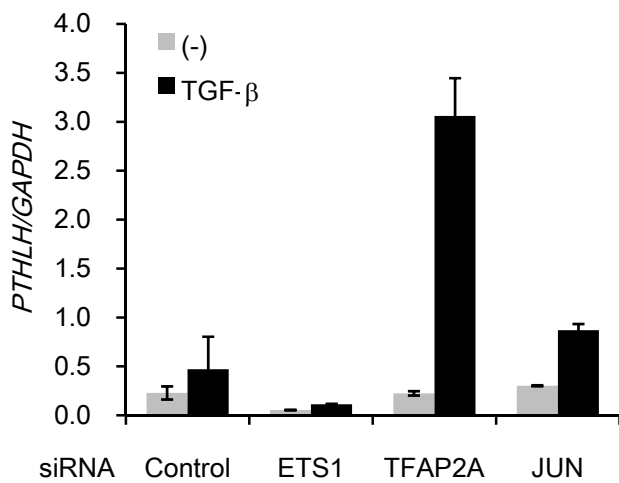

A

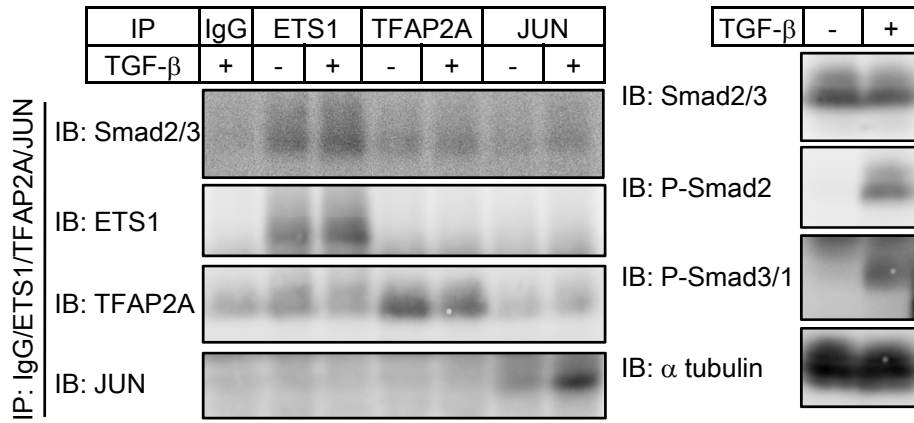

B

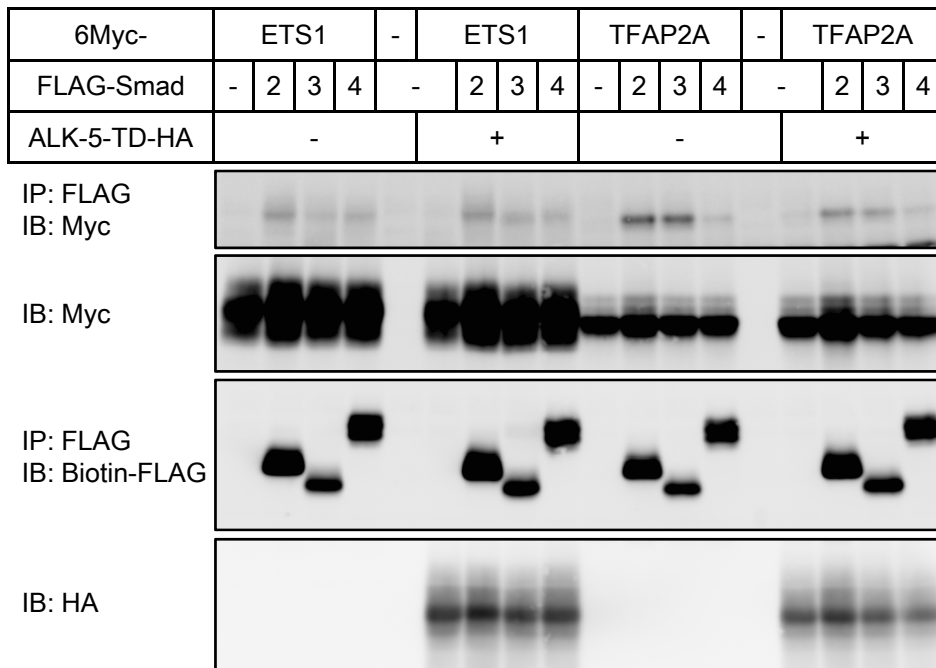

A

Supplementary Figure S6

|                   |         | Genes       |               | SBRs ( $p < 10^{-4}$ ) |              |             |
|-------------------|---------|-------------|---------------|------------------------|--------------|-------------|
|                   |         | *a          | % total genes | *b                     | % total SBRs | *b/ *a (%)  |
| Total             |         | <b>9669</b> | 100           | <b>1329</b>            | 100          | <b>13.7</b> |
| ≥ 2 fold increase | 1.5 hrs | <b>126</b>  | 1.3           | <b>58</b>              | 4.4          | <b>46.0</b> |
|                   | 6 hrs   | <b>342</b>  | 3.5           | <b>152</b>             | 11.4         | <b>44.4</b> |
|                   | 24 hrs  | <b>761</b>  | 7.9           | <b>225</b>             | 16.9         | <b>29.6</b> |
| ≥ 2 fold decrease | 1.5 hrs | <b>27</b>   | 0.3           | <b>4</b>               | 0.3          | <b>14.8</b> |
|                   | 6 hrs   | <b>177</b>  | 1.8           | <b>23</b>              | 1.7          | <b>13.0</b> |
|                   | 24 hrs  | <b>714</b>  | 7.4           | <b>98</b>              | 7.4          | <b>13.7</b> |

B

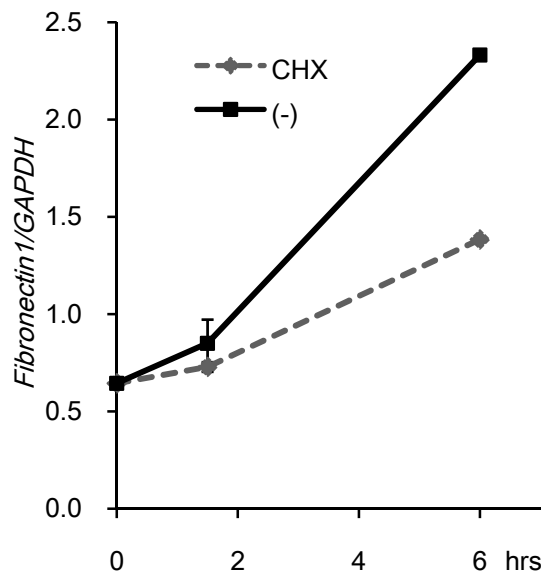

Supplement: MCB.01038-08_1.pdf [file MCB.01038-08_1.pdf]
